# Supplementary material for: Stereo-selective synthesis of complex dienes and eneynes by sequential hydroarylation and olefinic C–H functionalization
Source: Royal Society of Chemistry journal article supplement (doi:10.1039/d4qo00726c), 2024-01-01
Supplement: d4qo00726c1.pdf [file d4qo00726c1.pdf]

## Supporting Information

For the article entitled

### **Stereo-selective synthesis of complex dienes and eneynes by sequential hydroarylation and olefinic C–H functionalization**

Yuhang Zhu, Xiaoli Li, Cheng Zhang, Xiuying Liu, Linzhi Huang, Yongbo Zhang,

Chao Shen,\* Liyuan Ding, Guofu Zhong,\* and Jian Zhang\*

shenchaozju@zjsru.edu.cn; gzhong@eitech.edu.cn; zhangjian@hznu.edu.cn

## Table of Contents

|                                                      |     |
|------------------------------------------------------|-----|
| 1. General Methods .....                             | 2   |
| 2. General Procedure for Substrate Synthesis.....    | 3   |
| 3. General Procedure for C–H Functionalization ..... | 16  |
| 4. Deuterium-Labelled Experiments .....              | 51  |
| 5. KIE Experiments .....                             | 55  |
| 6. Synthetic Applications.....                       | 58  |
| 7. Photophysical properties of the products .....    | 62  |
| 8. References.....                                   | 64  |
| 9. NMR Spectra.....                                  | 65  |
| 10. X-Ray Crystal Data .....                         | 183 |

## 1. General Methods

Analytical thin layer chromatography (TLC) was performed using Merck 60 F254 precoated silica gel plate (0.2 mm thickness). Subsequent to elution, plates were visualized using UV radiation (254 nm) on Spectroline Model ENF-24061/F 254 nm. Further visualization was possible by staining with basic solution of potassium permanganate or acidic solution of ceric molybdate. Flash column chromatography was performed using Merck aluminium oxide 90 active neutral with freshly distilled solvents. Columns were typically packed as slurry and equilibrated with the appropriate solvent system prior to use. Proton nuclear magnetic resonance spectra ( $^1\text{H}$  NMR) were recorded on Bruker AMX 400 spectrophotometer ( $\text{CDCl}_3$  as solvent), and Bruker AMX 500 spectrophotometer ( $\text{CDCl}_3$  as solvent). Chemical shifts for  $^1\text{H}$  NMR spectra are reported as  $\delta$  in units of parts per million (ppm) downfield from  $\text{SiMe}_4$  ( $\delta$  0.0) and relative to the signal of chloroform-*d* ( $\delta$  7.26, singlet). Multiplicities were given as: s (singlet), d (doublet), t (triplet), q (quartets), dd (doublets of doublet) or m (multiplets). The number of protons (n) for a given resonance is indicated by nH. Coupling constants are reported as a *J* value in Hz. Carbon nuclear magnetic resonance spectra ( $^{13}\text{C}$  NMR) are reported as  $\delta$  in units of parts per million (ppm) downfield from  $\text{SiMe}_4$  ( $\delta$  0.0) and relative to the signal of chloroform-*d* ( $\delta$  77.0, triplet). Mass spectrometry was performed by Waters Q-ToF Premier Micromass instrument, using Electro Spray Ionization (ESI) mode. IR spectra were recorded as thin films on KBr plates on a Bio-Rad FTS 165 FTIR spectrometer and are reported in frequency of absorption ( $\text{cm}^{-1}$ ).  $\text{Pd}(\text{OAc})_2$  and  $[\text{Rh}(\text{cod})\text{Cl}]_2$  were purchased from TCI and used directly. Other reagents, unless otherwise noted below, are commercially available from TCI, Energy Chemical, Alfa Aesar (China) Chemical Co. Ltd. and used without further purification. The corresponding alkenes were prepared from the bromides by the reported methods.

## 2. General Procedure for Substrate Synthesis

### 2.1 General Procedure A for Substrate Synthesis

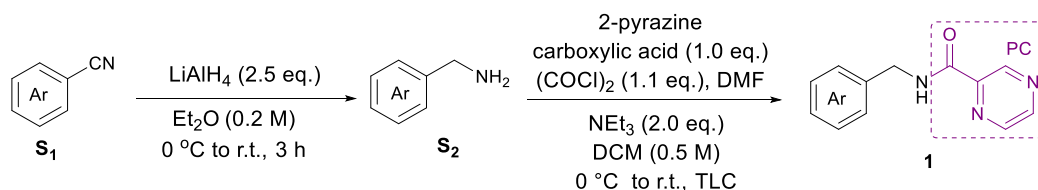

**General Procedure for Benzonitrile Reduction<sup>[1]</sup>:** To a solution of substituted benzonitrile ( $S_1$ ) in  $\text{Et}_2\text{O}$  (0.2 M) was added  $\text{LiAlH}_4$  (2.5 equiv, 2.5 M in  $\text{Et}_2\text{O}$ ) dropwisely over 30 min at  $0\text{ }^\circ\text{C}$  and stirred for 3 h at room temperature. After the reaction was completed (monitored by TLC),  $\text{NaOH}$  (2 N, aq.) was added slowly until a clear solution was obtained. The  $\text{Et}_2\text{O}$  layer was separated and the aqueous phase was extracted with  $\text{Et}_2\text{O}$  (20 mL  $\times$  3). The organic layer was combined and dried over anhydrous  $\text{Na}_2\text{SO}_4$ . After removing the solvent under reduced pressure, the resulting benzylamine ( $S_2$ ) was used in the next step without further purification.

**General Procedure for Amide Preparation<sup>[2]</sup>:** A 50 mL round-bottomed flask immersed in a  $0\text{ }^\circ\text{C}$  bath (ice and water) was charged with 2-pyrazinecarboxylic acid (5.0 mmol, 1.0 equiv) and  $\text{CH}_2\text{Cl}_2$  (10 mL). The stirred suspension was added oxalyl chloride (5.50 mmol, 1.10 equiv, 2.0 mol/L in DCM) dropwisely over a 15 minute period followed by the addition of DMF (0.1 mL, catalytic amount) in one portion, producing a yellow solution with gas evolution. The mixture was kept in the cooling bath for 1 h and then allowed to warm to room temperature. After gas evolution ceased, the mixture was again cooled to  $0\text{ }^\circ\text{C}$  and  $\text{NEt}_3$  (10.0 mmol, 2.0 equiv) was added dropwisely over a 15 minute period followed by dropwise addition of benzylamine ( $S_2$ ) (5.50 mmol, 1.10 equiv) over a 15 minute period. The brown mixture was kept in a cooling bath for 30 minutes and then allowed to warm to room temperature. Stirring was continued at room temperature for 6-8 h. The reaction mixture was quenched with water and extracted with  $\text{CH}_2\text{Cl}_2$  (10 mL  $\times$  3). The organic phase was combined and dried over anhydrous  $\text{Na}_2\text{SO}_4$  and filtered. The solvent was

removed in vacuo, and the resulting residue was purified by silica gel column chromatography (PE/EA mixtures) to obtain the corresponding amide **1**.

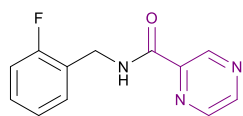

**N-(2-Fluorobenzyl) pyrazine-2-carboxamide (1a)** Following the general procedure A from 2-Fluorobenzylamine, **1a** was obtained as a white solid (89% yield, m.p. = 105.2 °C). **<sup>1</sup>H NMR** (500 MHz, CDCl<sub>3</sub>) δ 9.42 (s, 1H), 8.82 – 8.68 (m, 1H), 8.51 (s, 1H), 8.20 (s, 1H), 7.41 (t, *J* = 7.3 Hz, 1H), 7.28 (d, *J* = 19.2 Hz, 1H), 7.12 (t, *J* = 7.4 Hz, 1H), 7.07 (t, *J* = 9.2 Hz, 1H), 4.73 (d, *J* = 6.1 Hz, 2H). **<sup>13</sup>C NMR** (125 MHz, CDCl<sub>3</sub>) δ 161.93, 161.02, 159.06, 146.32, 143.38 (d, *J*<sub>CF</sub> = 21.9 Hz), 141.52, 129.25 (d, *J*<sub>CF</sub> = 4.1 Hz), 128.50 (d, *J*<sub>CF</sub> = 8.1 Hz), 123.72 (d, *J*<sub>CF</sub> = 14.8 Hz), 123.34 (d, *J*<sub>CF</sub> = 3.6 Hz), 114.45 (d, *J*<sub>CF</sub> = 21.2 Hz), 36.46 (d, *J*<sub>CF</sub> = 4.0 Hz). **<sup>19</sup>F NMR** (471 MHz, CDCl<sub>3</sub>) δ -118.74. **HRMS (ESI)** calcd for C<sub>12</sub>H<sub>10</sub>FN<sub>3</sub>ONa [M+Na]<sup>+</sup>: 254.0700, found: 254.0703. **FTIR** (KBr, cm<sup>-1</sup>) 2965.42, 2836.45, 2710.28, 1605.61, 1358.88, 1070.09, 775.70.

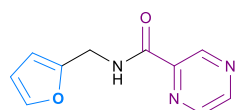

**N-(Furan-2-ylmethyl)pyrazine-2-carboxamide (1j)** Following the general procedure A from 2-Furfurylamine, **1j** was obtained as a white solid (68% yield, m.p. = 116.7 °C). **<sup>1</sup>H NMR** (500 MHz, CDCl<sub>3</sub>) δ 9.43 (s, 1H), 8.75 (d, *J* = 2.4 Hz, 1H), 8.60 – 8.50 (m, 1H), 8.13 (s, 1H), 7.38 (s, 1H), 6.38 – 6.23 (m, 2H), 4.68 (d, *J* = 5.9 Hz, 2H). **<sup>13</sup>C NMR** (125 MHz, CDCl<sub>3</sub>) δ 161.77, 149.71, 146.35, 143.49, 143.25, 141.53, 141.41, 109.47, 106.78, 35.37. **HRMS (ESI)** calcd for C<sub>10</sub>H<sub>9</sub>N<sub>3</sub>O<sub>2</sub>Na [M+Na]<sup>+</sup>: 226.0587, found: 226.0596. **FTIR** (KBr, cm<sup>-1</sup>) 2968.22, 2713.08, 1602.80, 1361.68, 1078.50, 778.50.

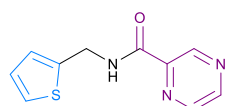

**N-(Thiophen-2-ylmethyl)pyrazine-2-carboxamide (1k)** Following the general procedure A from 2-Thiophenemethylamine, **1k** was obtained as a white solid (89% yield, m.p. = 114.8 °C). **<sup>1</sup>H NMR** (500 MHz, CDCl<sub>3</sub>) δ 9.48 – 9.38 (m, 1H), 8.75 (d, *J* = 2.3 Hz, 1H), 8.60 – 8.47 (m, 1H), 8.17 (s, 1H), 7.27 – 7.22 (m, 1H), 7.07 (d, *J* = 2.9

Hz, 1H), 6.98 (dd,  $J = 5.0, 3.6$  Hz, 1H), 4.85 (d,  $J = 6.0$  Hz, 2H). **<sup>13</sup>C NMR** (125 MHz, CDCl<sub>3</sub>)  $\delta$  162.70, 147.42, 144.53, 144.22, 142.59, 140.16, 127.01, 126.42, 125.49, 38.17. **HRMS (ESI)** calcd for C<sub>10</sub>H<sub>9</sub>N<sub>3</sub>OSNa [M+Na]<sup>+</sup>: 242.0359, found: 242.0367. **FTIR** (KBr, cm<sup>-1</sup>) 2954.21, 2833.64, 2713.08, 1597.20, 1361.68, 1081.31, 775.70.

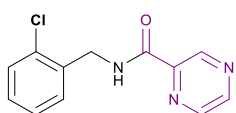

**N-(2-Chlorobenzyl)pyrazine-2-carboxamide (1l)** Following the general procedure A from 2-Chlorobenzylamine, **1l** was obtained as a white solid (88% yield, m.p. = 103.3 °C). **<sup>1</sup>H NMR** (500 MHz, CDCl<sub>3</sub>)  $\delta$  9.42 (s, 1H), 8.75 (s, 1H), 8.52 (s, 1H), 8.27 (s, 1H), 7.43 (d,  $J = 33.8$  Hz, 2H), 7.30 – 7.15 (m, 2H), 4.77 (d,  $J = 5.3$  Hz, 2H). **<sup>13</sup>C NMR** (125 MHz, CDCl<sub>3</sub>)  $\delta$  161.93, 146.34, 143.48, 143.30, 141.55, 134.16, 132.74, 129.19, 128.60, 128.12, 126.13, 40.42. **HRMS (ESI)** calcd for C<sub>12</sub>H<sub>10</sub>ClN<sub>3</sub>ONa [M+Na]<sup>+</sup>: 270.0405, found: 270.0408. **FTIR** (KBr, cm<sup>-1</sup>) 2830.84, 2713.08, 1597.20, 1361.68, 1067.29, 775.70.

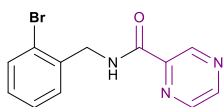

**N-(2-Bromobenzyl)pyrazine-2-carboxamide (1m)** Following the general procedure A from 2-Bromobenzylamine, **1m** was obtained as a white solid (86% yield, m.p. = 104.5 °C). **<sup>1</sup>H NMR** (500 MHz, CDCl<sub>3</sub>)  $\delta$  9.42 (d,  $J = 1.4$  Hz, 1H), 8.75 (d,  $J = 2.4$  Hz, 1H), 8.55 – 8.50 (m, 1H), 8.30 (s, 1H), 7.61 – 7.53 (m, 1H), 7.46 (dd,  $J = 7.6, 1.5$  Hz, 1H), 7.32 – 7.28 (m, 1H), 7.20 – 7.12 (m, 1H), 4.76 (d,  $J = 6.3$  Hz, 2H). **<sup>13</sup>C NMR** (125 MHz, CDCl<sub>3</sub>)  $\delta$  161.90, 146.34, 143.48, 143.29, 141.56, 135.81, 131.88, 129.34, 128.35, 126.77, 122.82, 42.75. **HRMS (ESI)** calcd for C<sub>12</sub>H<sub>10</sub>BrN<sub>3</sub>ONa [M+Na]<sup>+</sup>: 313.9899, found: 313.9902. **FTIR** (KBr, cm<sup>-1</sup>) 2954.21, 2833.64, 2724.30, 2354.21, 1605.61, 1364.49, 1072.90, 772.90.

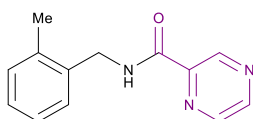

**N-(2-Methylbenzyl)pyrazine-2-carboxamide (1n)** Following the general procedure A from 2-Methylbenzylamine, **1n** was

obtained as a white solid (64% yield, m.p. = 102.0 °C). **<sup>1</sup>H NMR** (500 MHz, CDCl<sub>3</sub>) δ 9.37 (d, *J* = 1.4 Hz, 1H), 8.66 (d, *J* = 2.4 Hz, 1H), 8.44 – 8.39 (m, 1H), 7.89 (s, 1H), 7.23 (d, *J* = 7.3 Hz, 1H), 7.17 – 7.09 (m, 3H), 4.60 (d, *J* = 5.8 Hz, 2H), 2.30 (s, 3H). **<sup>13</sup>C NMR** (125 MHz, CDCl<sub>3</sub>) δ 161.68, 146.28, 143.47, 143.35, 141.48, 135.46, 134.34, 129.59, 127.59, 126.92, 125.27, 40.65, 18.07. **HRMS (ESI)** calcd for C<sub>13</sub>H<sub>13</sub>N<sub>3</sub>ONa [M+Na]<sup>+</sup>: 250.0951, found: 250.0956. **FTIR** (KBr, cm<sup>-1</sup>) 2965.42, 2833.64, 2713.08, 2357.01, 1611.21, 1364.49, 1067.29, 775.70, 565.42.

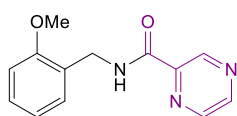

***N*-(2-Methoxybenzyl)pyrazine-2-carboxamide (1o)** Following the general procedure A from 2-Methoxybenzylamine, **1o** was obtained as a white solid (73% yield, m.p. = 114.8 °C). **<sup>1</sup>H**

**NMR** (500 MHz, CDCl<sub>3</sub>) δ 9.41 (d, *J* = 1.4 Hz, 1H), 8.71 (d, *J* = 2.4 Hz, 1H), 8.51 – 8.46 (m, 1H), 8.26 (s, 1H), 7.34 (dd, *J* = 7.4, 1.4 Hz, 1H), 7.31 – 7.25 (m, 2H), 6.98 – 6.87 (m, 2H), 4.68 (d, *J* = 6.2 Hz, 2H), 3.89 (s, 2H). **<sup>13</sup>C NMR** (125 MHz, CDCl<sub>3</sub>) δ 161.64, 156.61, 146.04, 143.73, 143.47, 141.48, 128.71, 128.02, 124.76, 119.65, 109.38, 54.39, 38.22. **HRMS (ESI)** calcd for C<sub>13</sub>H<sub>13</sub>N<sub>3</sub>O<sub>2</sub>Na [M+Na]<sup>+</sup>: 266.0900, found: 266.0892. **FTIR** (KBr, cm<sup>-1</sup>) 2965.42, 2828.04, 2718.69, 1591.59, 1367.29, 1067.29, 775.70, 559.81.

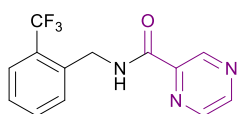

***N*-(2-(Trifluoromethyl)benzyl)pyrazine-2-carboxamide (1p)** Following the general procedure A from 2-(Trifluoromethyl)benzylamine, **1p** was obtained as a white

solid (71% yield, m.p. = 117.8 °C). **<sup>1</sup>H NMR** (500 MHz, CDCl<sub>3</sub>) δ 9.44 (d, *J* = 1.4 Hz, 1H), 8.76 (d, *J* = 2.4 Hz, 1H), 8.52 (dd, *J* = 2.3, 1.5 Hz, 1H), 8.22 (s, 1H), 7.68 (d, *J* = 7.8 Hz, 1H), 7.64 (d, *J* = 7.7 Hz, 1H), 7.54 (t, *J* = 7.5 Hz, 1H), 7.41 (t, *J* = 7.6 Hz, 1H), 4.87 (d, *J* = 6.4 Hz, 2H). **<sup>13</sup>C NMR** (125 MHz, CDCl<sub>3</sub>) δ 162.98, 147.45, 144.52, 144.20, 142.62, 136.10 (d, *J*<sub>CF</sub> = 1.5 Hz), 132.42, 130.76, 128.30 (d, *J*<sub>CF</sub> = 30.5 Hz), 127.84, 126.11 (q, *J*<sub>CF</sub> = 5.6 Hz), 124.43 (d, *J*<sub>CF</sub> = 271.4 Hz), 40.07 (d, *J*<sub>CF</sub> = 2.2 Hz). **<sup>19</sup>F NMR** (471 MHz, CDCl<sub>3</sub>) δ -59.47. **HRMS (ESI)** calcd for C<sub>13</sub>H<sub>10</sub>F<sub>3</sub>N<sub>3</sub>ONa

[M+Na]<sup>+</sup>: 304.0668, found: 304.0672. **FTIR** (KBr, cm<sup>-1</sup>) 2959.81, 2830.84, 2721.50, 1591.59, 1361.68, 1078.50, 775.70.

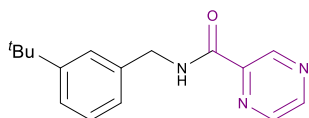

***N*-(3-(Tert-butyl)benzyl)pyrazine-2-carboxamide (1r)**

Following the general procedure A 3-(tert-butyl)benzyl nitrile, **1r** was obtained as a white solid (62% yield for two steps, m.p. = 106.4 °C). **<sup>1</sup>H NMR** (500 MHz, CDCl<sub>3</sub>) δ 9.46 (d, *J* = 1.1 Hz, 1H), 8.74 (d, *J* = 2.4 Hz, 1H), 8.50 (s, 1H), 8.11 (s, 1H), 7.42 – 7.25 (m, 3H), 7.19 (d, *J* = 7.3 Hz, 1H), 4.68 (d, *J* = 6.0 Hz, 2H), 1.32 (s, 9H). **<sup>13</sup>C NMR** (125 MHz, CDCl<sub>3</sub>) δ 161.77, 150.75, 146.24, 143.49, 143.42, 141.50, 136.24, 127.53, 124.00, 123.72, 42.82, 33.66, 30.30. **HRMS (ESI)** calcd for C<sub>16</sub>H<sub>19</sub>N<sub>3</sub>O<sub>2</sub>Na [M+Na]<sup>+</sup>: 292.1420, found: 292.1422. **FTIR** (KBr, cm<sup>-1</sup>) 2959.81, 2830.84, 2713.08, 2351.40, 1597.20, 1358.88, 1070.09, 778.50.

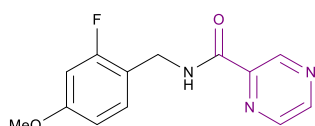

***N*-(2-Fluoro-4-methoxybenzyl)pyrazine-2-carboxamide**

**(1s)** Following the general procedure A from 2-fluoro-4-methoxybenzyl nitrile, **1s** was obtained as a white solid (65% yield for two steps, m.p. = 110.8 °C). **<sup>1</sup>H NMR** (500 MHz, CDCl<sub>3</sub>) δ 9.42 (s, 1H), 8.74 (d, *J* = 2.3 Hz, 1H), 8.52 – 8.46 (m, 1H), 8.12 (s, 1H), 7.32 (t, *J* = 8.6 Hz, 1H), 6.71 – 6.60 (m, 2H), 4.65 (d, *J* = 6.1 Hz, 2H), 3.79 (s, 3H). **<sup>13</sup>C NMR** (125 MHz, CDCl<sub>3</sub>) δ 162.85, 161.62 (d, *J*<sub>CF</sub> = 259.5 Hz), 160.68 (d, *J*<sub>CF</sub> = 2.3 Hz), 147.28, 144.46, 144.40, 142.53, 131.01 (d, *J*<sub>CF</sub> = 6.2 Hz), 116.64 (d, *J*<sub>CF</sub> = 15.5 Hz), 109.90 (d, *J*<sub>CF</sub> = 3.1 Hz), 101.80 (d, *J*<sub>CF</sub> = 25.0 Hz), 55.59, 37.13 (d, *J*<sub>CF</sub> = 3.3 Hz). **<sup>19</sup>F NMR** (471 MHz, CDCl<sub>3</sub>) δ -116.65. **HRMS (ESI)** calcd for C<sub>13</sub>H<sub>12</sub>FN<sub>3</sub>O<sub>2</sub>Na [M+Na]<sup>+</sup>: 284.0806, found: 284.0808. **FTIR** (KBr, cm<sup>-1</sup>) 2962.62, 2830.84, 2710.28, 1600.00, 1367.29, 1070.09, 781.31.



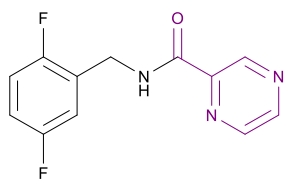

***N*-(2,5-Difluorobenzyl)pyrazine-2-carboxamide (1t)**

Following the general procedure A from 2,5-difluorobenzonitrile, **1t** was obtained as a white solid (60% yield for two steps, m.p. = 132.7 °C). **<sup>1</sup>H NMR** (500 MHz, CDCl<sub>3</sub>) δ 9.43 (s, 1H), 8.77 (d, *J* = 2.4 Hz, 1H), 8.58 – 8.51 (m, 1H), 8.22 (s, 1H), 7.16 – 7.09 (m, 1H), 7.07 – 7.00 (m, 1H), 7.00 – 6.91 (m, 1H), 4.71 (d, *J* = 6.3 Hz, 2H). **<sup>13</sup>C NMR** (125 MHz, CDCl<sub>3</sub>) δ 162.11, 157.69 (dd, *J*<sub>CF</sub> = 230.1, 2.4 Hz), 155.76 (dd, *J*<sub>CF</sub> = 229.2, 2.4 Hz), 146.50, 143.51, 143.09, 141.57, 125.49 (dd, *J*<sub>CF</sub> = 17.5, 7.5 Hz), 115.46 (dd, *J*<sub>CF</sub> = 24.4, 14.4 Hz), 115.44 (dd, *J*<sub>CF</sub> = 24.4, 1.0 Hz), 114.67 (dd, *J*<sub>CF</sub> = 24.1, 8.6 Hz), 36.14 (d, *J*<sub>CF</sub> = 3.2 Hz). **<sup>19</sup>F NMR** (471 MHz, CDCl<sub>3</sub>) δ -118.31 (d, *J*<sub>FF</sub> = 17.8 Hz), -124.84 (d, *J*<sub>FF</sub> = 17.8 Hz). **HRMS (ESI)** calcd for C<sub>12</sub>H<sub>9</sub>F<sub>2</sub>N<sub>3</sub>ONa [M+Na]<sup>+</sup>: 272.0606, found: 272.0599. **FTIR** (KBr, cm<sup>-1</sup>) 2957.01, 2828.04, 2718.69, 2357.01, 1597.20, 1361.68, 1070.09, 781.31.

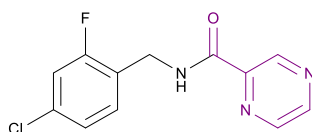

***N*-(4-Chloro-2-fluorobenzyl)pyrazine-2-carboxamide (1u)**

Following the general procedure A from (4-chloro-2-fluorophenyl)methanamine, **1u** was obtained as a white solid (89% yield, m.p. = 128.6 °C). **<sup>1</sup>H NMR** (500 MHz, CDCl<sub>3</sub>) δ 9.42 (s, 1H), 8.76 (d, *J* = 2.3 Hz, 1H), 8.52 (s, 1H), 8.19 (s, 1H), 7.37 (t, *J* = 8.2 Hz, 1H), 7.16 – 7.07 (m, 2H), 4.69 (d, *J* = 6.3 Hz, 2H). **<sup>13</sup>C NMR** (125 MHz, CDCl<sub>3</sub>) δ 163.08, 160.76 (d, *J*<sub>CF</sub> = 250.1 Hz), 147.48, 144.50, 144.16, 142.58, 134.42 (d, *J*<sub>CF</sub> = 10.3 Hz), 131.06 (d, *J*<sub>CF</sub> = 5.1 Hz), 124.75 (d, *J*<sub>CF</sub> = 3.6 Hz), 123.56 (d, *J*<sub>CF</sub> = 15.0 Hz), 116.33 (d, *J*<sub>CF</sub> = 24.8 Hz), 36.99 (d, *J*<sub>CF</sub> = 3.6 Hz). **<sup>19</sup>F NMR** (471 MHz, CDCl<sub>3</sub>) δ -116.10. **HRMS (ESI)** calcd for C<sub>12</sub>H<sub>9</sub>ClFN<sub>3</sub>ONa [M+Na]<sup>+</sup>: 288.0310, found: 288.0303. **FTIR** (KBr, cm<sup>-1</sup>) 2965.55, 2833.78, 2721.63, 1605.75, 1361.83, 1067.44, 773.05.

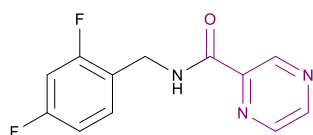

***N*-(2,4-Difluorobenzyl)pyrazine-2-carboxamide (1v)**

Following the general procedure A from

2,4-difluorobenzonitrile, **1v** was obtained as a white solid (63% yield for two steps, m.p. = 131.7 °C). **<sup>1</sup>H NMR** (500 MHz, CDCl<sub>3</sub>) δ 9.42 (s, 1H), 9.42 (d, *J* = 1.4 Hz, 1H), 8.76 (d, *J* = 2.3 Hz, 1H), 8.57 – 8.47 (m, 1H), 8.18 (s, 1H), 7.41 (q, *J* = 8.3 Hz, 1H), 6.91 – 6.74 (m, 2H), 4.69 (d, *J* = 6.2 Hz, 2H). **<sup>13</sup>C NMR** (125 MHz, CDCl<sub>3</sub>) 162.00, 161.52 (dd, *J*<sub>CF</sub> = 249.0, 12.0 Hz), 160.04 (dd, *J*<sub>CF</sub> = 249.1, 12.0 Hz), 146.42, 143.47, 143.18, 141.54, 130.21 (dd, *J*<sub>CF</sub> = 9.7, 5.8 Hz), 119.81 (dd, *J*<sub>CF</sub> = 15.1, 3.8 Hz), 110.43 (dd, *J*<sub>CF</sub> = 21.2, 3.7 Hz), 102.98 (t, *J*<sub>CF</sub> = 25.4 Hz), 35.95 (d, *J*<sub>CF</sub> = 3.4 Hz). **<sup>19</sup>F NMR** (471 MHz, CDCl<sub>3</sub>) δ -110.42 (d, *J*<sub>FF</sub> = 7.4 Hz), -114.52 (d, *J*<sub>FF</sub> = 7.4 Hz). **HRMS (ESI)** calcd for C<sub>12</sub>H<sub>9</sub>F<sub>2</sub>N<sub>3</sub>ONa [M+Na]<sup>+</sup>: 272.0606, found: 272.0611. **FTIR** (KBr, cm<sup>-1</sup>) 2959.81, 2833.64, 2713.08, 2357.01, 1608.41, 1370.09, 1075.70, 778.50.

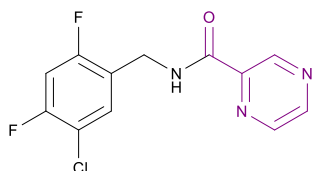

***N*-(5-Chloro-2,4-difluorophenyl)pyrazine-2-carboxamide**

**(1w)** Following the general procedure A from (5-chloro-2,4-difluorophenyl)methanamine, **1w** was

obtained as a white solid (92% yield, m.p. = 142.1 °C). **<sup>1</sup>H NMR** (500 MHz, CDCl<sub>3</sub>) δ 9.43 (s, 1H), 8.78 (d, *J* = 2.4 Hz, 1H), 8.62 – 8.48 (m, 1H), 8.21 (s, 1H), 7.48 (t, *J* = 7.8 Hz, 1H), 6.94 (t, *J* = 9.1 Hz, 1H), 4.67 (d, *J* = 6.4 Hz, 2H). **<sup>13</sup>C NMR** (125 MHz, CDCl<sub>3</sub>) δ 162.14, 158.15 (dd, *J*<sub>CF</sub> = 249.5, 10.4 Hz), 156.49 (dd, *J*<sub>CF</sub> = 251.5, 12.3 Hz), 146.57, 143.50, 142.98, 141.58, 130.21 (d, *J*<sub>CF</sub> = 5.4 Hz), 121.19 (dd, *J*<sub>CF</sub> = 16.4, 4.2 Hz), 115.61 (dd, *J*<sub>CF</sub> = 17.8, 4.2 Hz), 104.18 (dd, *J*<sub>CF</sub> = 26.8, 25.0 Hz), 35.57 (d, *J*<sub>CF</sub> = 3.3 Hz). **<sup>19</sup>F NMR** (471 MHz, CDCl<sub>3</sub>) δ -111.44 (d, *J*<sub>FF</sub> = 7.2 Hz), -116.07 (d, *J*<sub>FF</sub> = 7.4 Hz). **HRMS (ESI)** calcd for C<sub>12</sub>H<sub>8</sub>ClF<sub>2</sub>N<sub>3</sub>ONa [M+Na]<sup>+</sup>: 287.0232, found: 287.0240. **FTIR** (KBr, cm<sup>-1</sup>) 2962.75, 2830.97, 2716.02, 1602.95, 1361.83, 1064.64, 773.05.

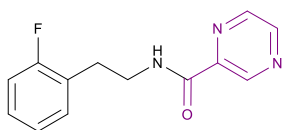

***N*-(2-Fluorophenethyl)pyrazine-2-carboxamide** (**1x**)

Following the general procedure A from 2-Fluorophenethylamine, **1x** was obtained as a white solid

(84% yield, m.p. = 99.0 °C). **<sup>1</sup>H NMR** (500 MHz, CDCl<sub>3</sub>) δ 9.40 (d, *J* = 1.4 Hz, 1H),

8.73 (d,  $J = 2.4$  Hz, 1H), 8.49 (dd,  $J = 2.4, 1.5$  Hz, 1H), 7.94 (s, 1H), 7.27 – 7.19 (m, 2H), 7.12 – 6.99 (m, 2H), 3.76 (q,  $J = 6.9$  Hz, 2H), 3.00 (t,  $J = 7.1$  Hz, 2H). **<sup>13</sup>C NMR** (125 MHz, CDCl<sub>3</sub>)  $\delta$  162.01, 160.26 (d,  $J_{CF} = 245.1$  Hz), 146.20, 143.40, 143.33, 141.50, 130.03 (d,  $J_{CF} = 4.8$  Hz), 127.41 (d,  $J_{CF} = 8.1$  Hz), 124.53 (d,  $J_{CF} = 15.9$  Hz), 123.21 (d,  $J_{CF} = 3.6$  Hz), 114.38 (d,  $J_{CF} = 22.0$  Hz), 38.51, 28.23 (d,  $J_{CF} = 1.7$  Hz). **<sup>19</sup>F NMR** (471 MHz, CDCl<sub>3</sub>) **<sup>19</sup>F NMR** (471 MHz, CDCl<sub>3</sub>)  $\delta$  -118.51. **HRMS (ESI)** calcd for C<sub>13</sub>H<sub>12</sub>FN<sub>3</sub>ONa [M+Na]<sup>+</sup>: 268.0852, found: 268.0857. **FTIR** (KBr, cm<sup>-1</sup>) 2957.01, 2833.64, 2718.69, 1602.80, 1367.29, 1078.50, 770.09.

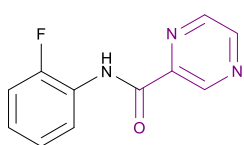

***N*-(2-Fluorophenyl)pyrazine-2-carboxamide** Following the general procedure A from 2-fluoroaniline, ***N*-(2-Fluorophenyl)pyrazine-2-carboxamide** was obtained as a white solid (71% yield, m.p. = 104.8 °C). **<sup>1</sup>H NMR** (500 MHz, CDCl<sub>3</sub>)  $\delta$  9.98 (s, 1H), 9.51 (s, 1H), 8.82 (d,  $J = 2.2$  Hz, 1H), 8.62 (s, 1H), 8.54 (t,  $J = 7.9$  Hz, 1H), 7.24 – 7.05 (m, 3H). **<sup>13</sup>C NMR** (125 MHz, CDCl<sub>3</sub>)  $\delta$  159.72, 151.79 (d,  $J_{CF} = 244.6$  Hz), 146.68, 143.58, 143.15, 141.53, 124.88, 123.89 (d,  $J_{CF} = 7.6$  Hz), 123.68 (d,  $J_{CF} = 3.7$  Hz), 120.36, 113.99 (d,  $J_{CF} = 19.0$  Hz). **<sup>19</sup>F NMR** (471 MHz, CDCl<sub>3</sub>)  $\delta$  -130.70. **HRMS (ESI)** calcd for C<sub>11</sub>H<sub>8</sub>FN<sub>3</sub>ONa [M+Na]<sup>+</sup>: 254.0700, found: 254.0705. **FTIR** (KBr, cm<sup>-1</sup>) 2957.01, 2828.04, 2721.50, 1591.59, 1364.49, 1078.50, 772.90.

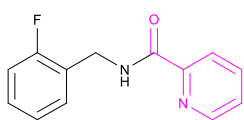

***N*-(2-Fluorobenzyl)picolinamide (1aa)** Following the general procedure A from 2-Fluorobenzylamine and 1-picolinic acid, **1aa** was obtained as a white solid (87% yield, m.p. = 75.8 °C). **<sup>1</sup>H NMR** (500 MHz, CDCl<sub>3</sub>):  $\delta$  8.53 (d,  $J = 4.2$  Hz, 1H), 8.42 (s, 1H), 8.22 (d,  $J = 7.8$  Hz, 1H), 7.88 – 7.80 (m, 1H), 7.42 (t,  $J = 6.7$  Hz, 2H), 7.30 – 7.22 (m, 1H), 7.14 – 7.03 (m, 2H), 4.73 (d,  $J = 6.2$  Hz, 2H). **<sup>13</sup>C NMR** (125 MHz, CDCl<sub>3</sub>)  $\delta$  163.28, 160.00 (d,  $J_{CF} = 246.4$  Hz), 148.70, 147.07, 136.31, 129.14 (d,  $J_{CF} = 4.3$  Hz), 128.22 (d,  $J_{CF} = 8.1$  Hz), 125.21, 124.18 (d,  $J_{CF} = 14.8$  Hz), 123.25 (d,  $J_{CF} = 3.6$  Hz), 121.30, 114.36 (d,  $J_{CF} = 21.3$  Hz), 36.32 (d,  $J_{CF} = 4.2$  Hz). **<sup>19</sup>F NMR** (471 MHz, CDCl<sub>3</sub>)  $\delta$  -118.80.

**HRMS (ESI)** calcd for C<sub>13</sub>H<sub>11</sub>FN<sub>2</sub>ONa [M+Na]<sup>+</sup>: 253.0748, found: 253.0739. **FTIR** (KBr, cm<sup>-1</sup>) 2951.40, 2836.45, 2721.50, 1594.39, 1367.29, 1064.49, 781.31.

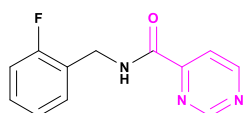

**N-(2-Fluorobenzyl)pyrimidine-4-carboxamide (1bb)**

Following the general procedure A from 2-Fluorobenzylamine and 1-pyrimidine-4-carboxylic acid, **1bb** was obtained as a yellow solid (70% yield, m.p. = 96.8 °C). **<sup>1</sup>H NMR** (500 MHz, CDCl<sub>3</sub>) δ 9.15 (d, *J* = 1.1 Hz, 1H), 8.90 (d, *J* = 5.0 Hz, 1H), 8.30 (s, 1H), 8.06 (dd, *J* = 5.0, 1.3 Hz, 1H), 7.36 – 7.29 (m, 1H), 7.26 – 7.17 (m, 1H), 7.10 – 6.95 (m, 2H), 4.65 (d, *J* = 6.2 Hz, 2H). **<sup>13</sup>C NMR** (125 MHz, CDCl<sub>3</sub>) δ 162.60, 161.06 (d, *J*<sub>CF</sub> = 246.6 Hz), 159.25, 157.78, 156.07, 130.25 (d, *J*<sub>CF</sub> = 4.1 Hz), 129.61 (d, *J*<sub>CF</sub> = 8.2 Hz), 124.51 (d, *J*<sub>CF</sub> = 14.9 Hz), 124.38 (d, *J*<sub>CF</sub> = 3.6 Hz), 118.61, 115.53 (d, *J*<sub>CF</sub> = 21.2 Hz), 37.65 (d, *J*<sub>CF</sub> = 4.0 Hz). **<sup>19</sup>F NMR** (471 MHz, CDCl<sub>3</sub>) δ -118.63. **HRMS (ESI)** calcd for C<sub>12</sub>H<sub>10</sub>FN<sub>3</sub>ONa [M+Na]<sup>+</sup>: 254.0700, found: 254.0705. **FTIR** (KBr, cm<sup>-1</sup>) 2948.60, 2715.89, 1597.20, 1361.68, 1070.09, 772.90.

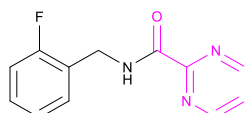

**N-(2-Fluorobenzyl)pyrimidine-2-carboxamide (1cc)**

Following the general procedure A from 2-Fluorobenzylamine and 1-pyrimidine-2-carboxylic acid, **1cc** was obtained as a yellow liquid (27% yield). **<sup>1</sup>H NMR** (500 MHz, CDCl<sub>3</sub>) δ 8.80 (d, *J* = 4.7 Hz, 2H), 8.30 (s, 1H), 7.37 (q, *J* = 8.6, 6.7 Hz, 2H), 7.20 (q, *J* = 6.4 Hz, 1H), 7.08 – 6.93 (m, 2H), 4.69 (d, *J* = 6.1 Hz, 2H). **<sup>13</sup>C NMR** (125 MHz, CDCl<sub>3</sub>) δ 162.17, 161.03 (d, *J*<sub>CF</sub> = 246.4 Hz), 157.48, 130.36 (d, *J*<sub>CF</sub> = 4.1 Hz), 129.47 (d, *J*<sub>CF</sub> = 8.1 Hz), 124.81, 124.66, 124.37 (d, *J*<sub>CF</sub> = 3.6 Hz), 122.63, 115.41 (d, *J*<sub>CF</sub> = 21.2 Hz), 37.77 (d, *J*<sub>CF</sub> = 4.0 Hz). **<sup>19</sup>F NMR** (471 MHz, CDCl<sub>3</sub>) δ -118.75. **HRMS (ESI)** calcd for C<sub>12</sub>H<sub>10</sub>FN<sub>3</sub>O [M+H]<sup>+</sup>: 232.0886, found: 232.0889. **FTIR** (KBr, cm<sup>-1</sup>) 2953.62, 2720.83, 1600.41, 1373.65, 1063.52, 773.91.

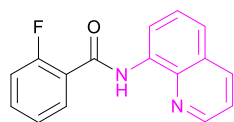

**2-Fluoro-N-(quinolin-8-yl)benzamide (1dd)** was performed according to previous literature<sup>[3]</sup> with 90% yield and the NMR data is consistent with the literature reports.

## 2.2 Procedure for the Synthesis of 1q

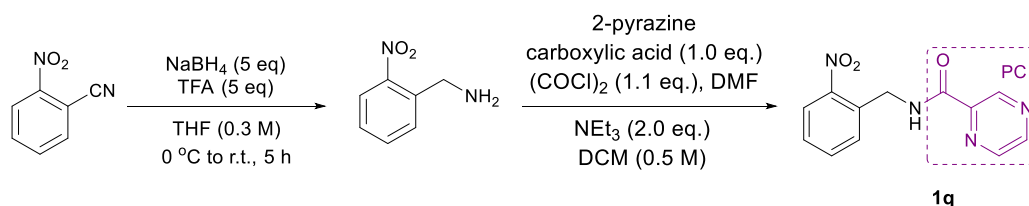

**Benzonitrile Reduction<sup>[4]</sup>:** A round bottom flask equipped with a stirring bar was charged with NaBH<sub>4</sub> (25.0 mmol, 5 equiv) and anhydrous THF (12.5 mL) was added via a syringe. The flask was submerged into an ice/water bath and cooled to 0 °C. The suspension was slowly added trifluoroacetic acid (25 mmol, 5.0 equiv) (Caution: gas evolution observed). A solution of 2-nitrobenzonitrile (5 mmol, 1 equiv) in THF (4 mL) was added. The ice bath was removed and the reaction mixture was stirred at room temperature overnight. After the reaction completed (monitored by TLC), the reaction mixture was poured into an aqueous solution of 1N sodium hydroxide (35 mL), then EtOAc (25 mL) was added and the biphasic mixture was stirred for 1.5 h. The layers were separated and the aqueous layer was extracted with EtOAc (12.5 mL×3). The organic layers were combined and washed with saturated brine. Then, the organic layers were dried over anhydrous Na<sub>2</sub>SO<sub>4</sub> and filtered. The solvent was removed under reduced pressure, and the resulting residue was flushed through a short silica pad, eluting with CH<sub>2</sub>Cl<sub>2</sub>: MeOH (10:1, v/v) to obtain the corresponding crude benzylamine which was used in the next step without further purification.

**Amide Preparation** was performed following the **general procedure A**

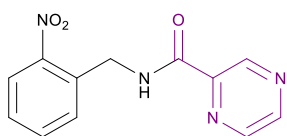

***N*-(2-Nitrobenzyl)pyrazine-2-carboxamide (1q)** Following the general procedure B, **1q** was obtained as a yellow solid (41% yield for two steps, m.p. = 125.5 °C). **<sup>1</sup>H NMR** (500

MHz, CDCl<sub>3</sub>) δ 9.39 (d, *J* = 1.2 Hz, 1H), 8.76 (d, *J* = 2.4 Hz, 1H), 8.62 (s, 1H), 8.58 – 8.49 (m, 1H), 8.11 (d, *J* = 8.8 Hz, 1H), 7.74 (d, *J* = 6.9 Hz, 1H), 7.65 (t, *J* = 8.0 Hz, 1H), 7.49 (t, *J* = 8.4 Hz, 1H), 4.95 (d, *J* = 6.7 Hz, 2H). **<sup>13</sup>C NMR** (125 MHz, CDCl<sub>3</sub>) δ 163.23, 148.30, 147.47, 144.43, 144.19, 142.73, 134.21, 133.15, 132.27, 128.98, 125.28, 41.21. **HRMS (ESI)** calcd for C<sub>12</sub>H<sub>10</sub>N<sub>4</sub>O<sub>3</sub>Na [M+Na]<sup>+</sup>: 281.0645, found: 281.0640. **FTIR** (KBr, cm<sup>-1</sup>) 2951.40, 2833.64, 2718.69, 1605.61, 1367.29, 1070.09, 778.50.

### 2.3 Procedure for the Synthesis of 1a-d

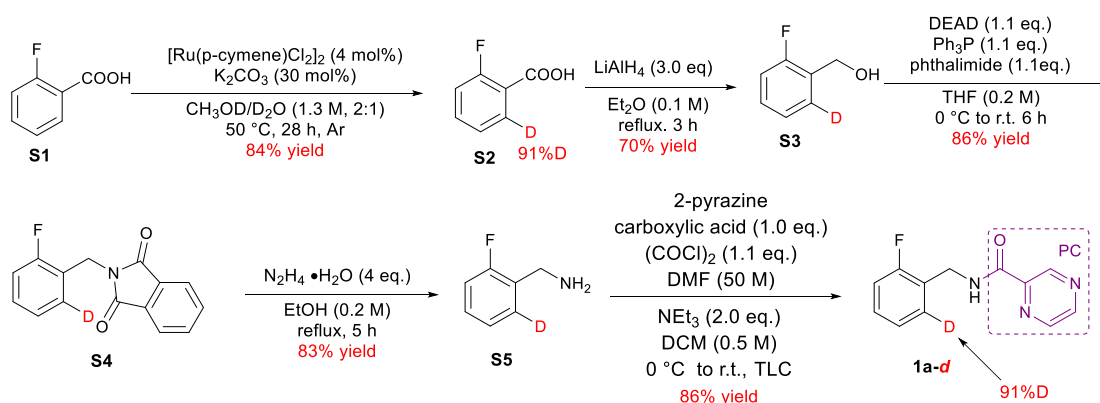

**Preparation of deuterobenzoic acid<sup>[5]</sup>:** A oven-dried Schlenk tube was sequentially added 2-fluorobenzoic acid (2.80 g, 20 mmol, 1 equiv), [Ru(*p*-cymene)Cl<sub>2</sub>]<sub>2</sub> (490.0 mg, 0.8 mmol, 0.04 equiv), and K<sub>2</sub>CO<sub>3</sub> (829.2 mg, 6 mmol, 0.03 equiv) in an open air. After being evacuated and backfilled with nitrogen three times, CH<sub>3</sub>OD (10 mL) and D<sub>2</sub>O (5 mL) were added. Then, the reaction tube was heated to 50 °C with stirring for 28 hours. After 28 hours, 2 N HCl (10 mL) was added, and extracted with ethyl acetate (20 mL × 3). The organic layers were combined and dried over anhydrous Na<sub>2</sub>SO<sub>4</sub>. After filtration and concentration in vacuo, the crude residue was purified by chromatography on silica gel (eluent: PE/EA= 10/1 to 5/1) to obtain deuterated

benzoic acid **S2** as a white solid (2.36 g, 84% yield, 91% deuterium).

**Carboxyl reduction**<sup>[6]</sup>: To a solution of substituted deuterated benzoic acid **S2** in Et<sub>2</sub>O (0.1 M) was added dropwise LiAlH<sub>4</sub> (3.0 equiv, 2.5 M in Et<sub>2</sub>O) over 30 min at 0 °C and then the solvent was heated to reflux with stirring for 3h. After the reaction was completed (monitored by TLC), 1N HCl was added slowly under 0 °C until a clear solution was obtained. The Et<sub>2</sub>O layer was separated and the aqueous phase was extracted with Et<sub>2</sub>O (20 mL × 3). The organic layers were combined and dried over Na<sub>2</sub>SO<sub>4</sub>. After filtrating and removing the solvent under reduced pressure, the crude residual was purified by chromatography on silica gel (eluent: PE/EA= 50/1 to 20/1) to obtain alcohol **S3** as a colorless liquid (70% yield, 91% deuterium).

**Mitsunobu reaction**<sup>[7]</sup>: Alcohol (**S3**) (1.0 equiv) and diethyl azodicarboxylate (DEAD, 1.1 equiv) were added to a solution of triphenylphosphine (1.1 equiv) and phthalimide (1.1 equiv) in dry THF (0.2 M) at 0 °C under a nitrogen atmosphere. The solution was stirred at 0 °C for 10 min and then at room temperature for an additional 6 h. After filtrating and removing the solvent under reduced pressure, the crude residue was purified by silica gel chromatography (eluent: PE/EA = 100:1) to obtain the product (**S4**) as a white solid (86% yield, 91% deuterium).

**Hydrazinolysis**<sup>[7]</sup>: A solution of **S4** (1.0 equiv) and N<sub>2</sub>H<sub>4</sub>·H<sub>2</sub>O (4.0 equiv) in EtOH (0.2 M) was heated to reflux with stirring for 3 h. The reaction was acidified with 1N HCl to pH = 3 and washed with Et<sub>2</sub>O (10 mL × 3). The aqueous phase was treated with 1 N NaOH solution to pH = 12 and extracted with DCM (10 mL × 3). The organic layers were combined and dried over Na<sub>2</sub>SO<sub>4</sub>, and the following filtration and concentration gave the product benzylamine (**S5**) as a yellow liquid (83% yield, 91% deuterium), which was used in the next step without further purification.

**Amide preparation** was performed following **the general procedure A** to obtained amide product **1a-d** as a white solid (86% yield, 91% deuterium).

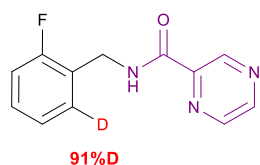

***N*-((2-Fluorocyclohexa-1,3-dien-1-yl-6-d)methyl)pyrazine-2-carboxamide (1a-d)** Following the procedure C, **1a-d** was

obtained as a white solid (36% yield for four steps, 91% deuterium). **<sup>1</sup>H NMR** (500 MHz, CDCl<sub>3</sub>) δ 9.43 (d, *J* = 1.4 Hz, 1H), 8.75 (d, *J* = 2.4 Hz, 1H), 8.52 (dd, *J* = 2.4, 1.5 Hz, 1H), 8.17 (s, 1H), 7.33 – 7.27 (m, 1H), 7.13 (d, *J* = 7.3 Hz, 1H), 7.10 – 7.05 (m, 1H), 4.74 (d, *J* = 6.2 Hz, 2H).

## 2.4 Procedure for the Synthesis of 3a-d

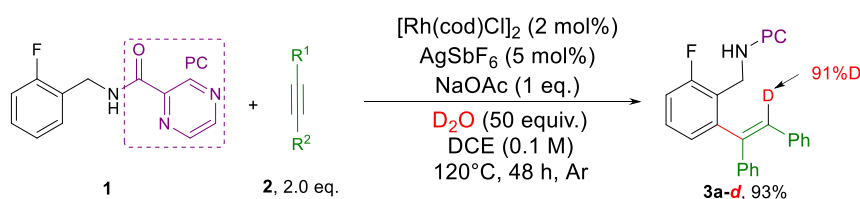

A screw-cap vial was charged with [Rh(cod)Cl]<sub>2</sub> (1.5 mg, 0.003 mmol, 2 mol%), AgSbF<sub>6</sub> (2.6 mg, 0.0075 mmol, 0.05 equiv), NaOAc (12.3 mg, 0.15 mmol, 1.00 equiv), amide **1** (0.15 mmol, 1.0 equiv), diphenylacetylene **2** (53.3 mg, 0.30 mmol, 2.00 equiv), DCE (1.5 mL) and D<sub>2</sub>O (7.5 mmol, 50 equiv) in sequence. The vial was sealed under argon and heated to 120 °C with stirring for 48 h. After cooling down, the mixture was concentrated and directly applied to a flash column chromatography (PE/EA mixtures) to obtain the corresponding product **3a-d** as a white solid (93% yield, 91% deuterium).

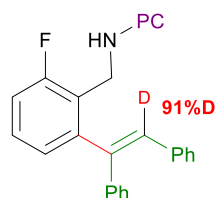

**(*E*)-*N*-(2-(1,2-Diphenylvinyl-2-d)-6-fluorobenzyl)pyrazine-2-carboxamide (3a-d)** Following the procedure D, **3a-d** was obtained

as a white solid (93% yield, 91% deuterium). **<sup>1</sup>H NMR** (500 MHz, CDCl<sub>3</sub>) δ 9.24 (d, *J* = 1.4 Hz, 1H), 8.62 (d, *J* = 2.4 Hz, 1H), 8.34 (dd, *J* = 2.4, 1.5 Hz, 1H), 7.48 (s, 1H), 7.29 – 7.21 (m, 1H), 7.15 – 7.07 (m, 8H), 7.07 – 6.98 (m, 4H), 4.50 (d, *J* = 6.6 Hz, 2H).



### 3. General Procedure for C–H Functionalization

#### 3.1 General Procedure 1 for Hydroarylation

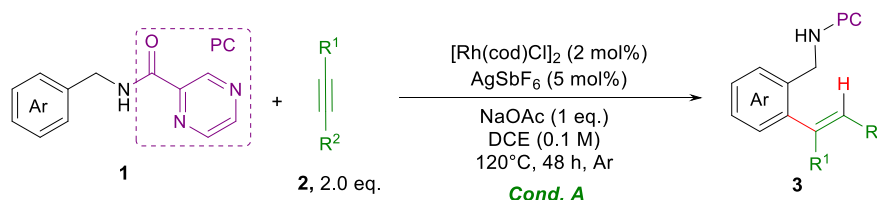

A screw-cap vial was charged with  $[\text{Rh}(\text{cod})\text{Cl}]_2$  (1.5 mg, 0.003 mmol, 2 mol%),  $\text{AgSbF}_6$  (2.6 mg, 0.0075 mmol, 0.05 equiv),  $\text{NaOAc}$  (12.3 mg, 0.15 mmol, 1.0 equiv), amide **1** (1.0 equiv, 0.15 mmol), diphenylacetylene **2** (53.3 mg, 0.30 mmol, 2.0 equiv) and DCE (1.5 mL) in sequence. The vial was sealed under argon and heated to 120 °C with stirring for 48 h. After cooling down, the mixture was concentrated and directly applied to a flash column chromatography (PE/EA mixtures) to obtain product **3**.

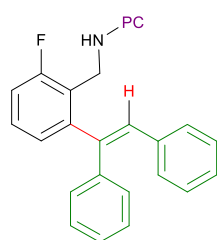

**(E)-N-(2-(2-(Cyclohexa-1,3-dien-1-yl)-1-phenylvinyl)-6-fluorobenzyl)pyrazine-2-carboxamide (3a)** Following the general procedure **1**, **3a** was obtained as a white solid (58.3 mg, 95% yield, m.p. = 111.1 °C). **<sup>1</sup>H NMR** (500 MHz,  $\text{CDCl}_3$ )  $\delta$  9.32 (d,  $J = 1.3$  Hz, 1H), 8.69 (d,  $J = 2.4$  Hz, 1H), 8.45 – 8.38 (m, 1H), 7.56 (s, 1H), 7.36 – 7.29 (m, 1H), 7.23 – 7.15 (m, 8H), 7.14 – 7.05 (m, 4H), 6.71 (s, 1H), 4.58 (d,  $J = 5.5$  Hz, 2H). **<sup>13</sup>C NMR** (125 MHz,  $\text{CDCl}_3$ )  $\delta$  162.04, 161.82 (d,  $J_{\text{CF}} = 248.0$  Hz), 147.01, 146.79 (d,  $J_{\text{CF}} = 3.4$  Hz), 144.44, 144.34, 142.28, 140.54 (d,  $J_{\text{CF}} = 2.6$  Hz), 139.57, 136.61, 131.68, 129.74, 129.42, 129.23 (d,  $J_{\text{CF}} = 9.4$  Hz), 128.61, 128.13, 127.66, 127.31, 126.54 (d,  $J_{\text{CF}} = 2.9$  Hz), 122.77 (d,  $J_{\text{CF}} = 14.9$  Hz), 114.98 (d,  $J_{\text{CF}} = 22.7$  Hz), 35.04 (d,  $J_{\text{CF}} = 4.8$  Hz). **<sup>19</sup>F NMR** (471 MHz,  $\text{CDCl}_3$ )  $\delta$  -115.69. **HRMS (ESI)** calcd for  $\text{C}_{26}\text{H}_{20}\text{FN}_3\text{ONa}$   $[\text{M}+\text{Na}]^+$ : 432.1483, found: 432.1482. **FTIR** (KBr,  $\text{cm}^{-1}$ ) 2962.62, 2830.84, 2718.69, 2348.60, 1605.61, 1361.68, 1067.29, 772.90.

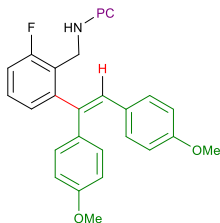

**(E)-N-(2-(1,2-Bis(4-methoxyphenyl)vinyl)-6-fluorobenzyl)pyrazine-2-carboxamide (3b)** Following the general procedure 1 at the conditions of 140°C, **3b** was obtained as a yellow liquid (53.5 mg, 76% yield). **<sup>1</sup>H NMR** (500 MHz, CDCl<sub>3</sub>) δ 9.31 (d, *J* = 1.3 Hz, 1H), 8.68 (d, *J* = 2.4 Hz, 1H), 8.41 (dd, *J* = 2.4, 1.5 Hz, 1H), 7.43 (s, 1H), 7.35 – 7.28 (m, 1H), 7.18 (d, *J* = 6.8 Hz, 1H), 7.10 (dd, *J* = 11.9, 8.7 Hz, 4H), 7.08 – 7.02 (m, 1H), 6.76 – 6.69 (m, 4H), 6.57 (s, 4H), 4.55 (d, *J* = 6.5 Hz, 2H), 3.77 (s, 3H), 3.66 (s, 3H). **<sup>13</sup>C NMR** (125 MHz, CDCl<sub>3</sub>) δ 162.02, 161.77 (d, *J*<sub>CF</sub> = 247.9 Hz), 158.90, 158.66, 147.42 (d, *J*<sub>CF</sub> = 3.3 Hz), 146.95, 144.44, 144.26, 142.34, 138.43 (d, *J*<sub>CF</sub> = 2.6 Hz), 132.23, 130.98, 130.62, 130.18, 129.41, 129.20 (d, *J*<sub>CF</sub> = 9.5 Hz), 126.51 (d, *J*<sub>CF</sub> = 2.8 Hz), 122.60 (d, *J*<sub>CF</sub> = 14.8 Hz), 114.78 (d, *J*<sub>CF</sub> = 22.7 Hz), 114.06, 113.55, 55.19, 55.03, 35.04 (d, *J*<sub>CF</sub> = 4.9 Hz). **<sup>19</sup>F NMR** (471 MHz, CDCl<sub>3</sub>) δ -115.84. **HRMS (ESI)** calcd for C<sub>28</sub>H<sub>24</sub>FN<sub>3</sub>O<sub>3</sub>Na [M+Na]<sup>+</sup>: 492.1694, found: 492.1680. **FTIR** (KBr, cm<sup>-1</sup>) 2962.62, 2828.04, 2724.30, 1611.21, 1361.68, 1067.29, 775.70.

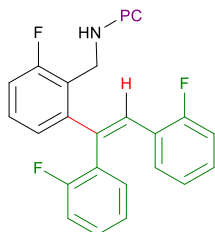

**(Z)-N-(2-(1,2-Bis(2-fluorophenyl)vinyl)-6-fluorobenzyl)pyrazine-2-carboxamide (3c)** Following the general procedure 1 at the conditions of 140°C, **3c** was obtained as a white solid (34.7 mg, 52% yield, m.p. = 143.9 °C). **<sup>1</sup>H NMR** (500 MHz, CDCl<sub>3</sub>) δ 9.34 (d, *J* = 1.2 Hz, 1H), 8.70 (d, *J* = 2.4 Hz, 1H), 8.51 – 8.39 (m, 1H), 7.75 (s, 1H), 7.35 – 7.28 (m, 1H), 7.21 – 7.14 (m, 4H), 7.09 (t, *J* = 8.9 Hz, 1H), 7.05 – 6.97 (m, 2H), 6.97 – 6.91 (m, 2H), 6.89 (s, 1H), 6.85 (t, *J* = 7.5 Hz, 1H), 4.71 (d, *J* = 6.2 Hz, 2H). **<sup>13</sup>C NMR** (125 MHz, CDCl<sub>3</sub>) 162.16, 161.86 (d, *J*<sub>CF</sub> = 247.9 Hz), 160.59 (d, *J*<sub>CF</sub> = 249.0 Hz), 159.65 (d, *J*<sub>CF</sub> = 249.1 Hz), 147.05, 145.44 (d, *J* = 3.4 Hz), 144.42, 144.30, 142.39, 135.89, 131.57 (d, *J*<sub>CF</sub> = 3.3 Hz), 129.96 (d, *J*<sub>CF</sub> = 8.2 Hz), 129.52 (d, *J*<sub>CF</sub> = 3.0 Hz), 129.32 (dd, *J*<sub>CF</sub> = 22.8, 8.9 Hz), 127.29 (d, *J*<sub>CF</sub> = 14.6 Hz), 127.28 (d, *J*<sub>CF</sub> = 4.1 Hz), 126.22 (d, *J*<sub>CF</sub> = 3.0 Hz), 124.48, 124.45, 124.36, 123.57 (d, *J*<sub>CF</sub> = 3.5 Hz), 122.61 (d, *J*<sub>CF</sub> = 15.1 Hz), 116.26 (d, *J*<sub>CF</sub> = 22.0 Hz), 115.43 (d, *J*<sub>CF</sub> = 21.9 Hz), 115.09 (d, *J*<sub>CF</sub> = 22.6 Hz), 35.00 (d, *J*<sub>CF</sub> = 4.7 Hz). **<sup>19</sup>F NMR** (471 MHz, CDCl<sub>3</sub>) δ

-111.98, -115.24, -115.46. **HRMS (ESI)** calcd for  $C_{26}H_{18}F_3N_3ONa$   $[M+Na]^+$ : 468.1294, found: 468.1301. **FTIR** (KBr,  $cm^{-1}$ ) 2959.81, 2828.04, 271308, 1602.80, 1364.49, 1070.09, 778.50.

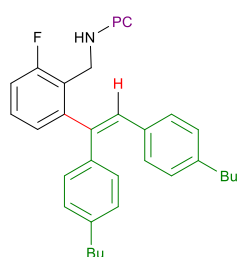

**(E)-N-(2-(1,2-Bis(4-butylphenyl)vinyl)-6-fluorobenzyl)pyrazine-2-carboxamide (3d)** Following the general procedure 1, **3d** was obtained as a yellow liquid (69.6 mg, 89% yield).  **$^1H$  NMR** (500 MHz,  $CDCl_3$ )  $\delta$  9.37 – 9.27 (m, 1H), 8.68 (d,  $J = 2.4$  Hz, 1H), 8.47 – 8.34 (m, 1H), 7.55 (s, 1H), 7.34 – 7.28 (m, 1H), 7.19 (d,  $J = 6.9$  Hz, 1H), 7.11 (d,  $J = 8.1$  Hz, 2H), 7.08 – 7.02 (m, 3H), 6.99 (dd,  $J = 8.1, 4.4$  Hz, 4H), 6.63 (s, 1H), 4.56 (d,  $J = 4.9$  Hz, 2H), 2.55 (t, 2H), 2.44 (t, 2H), 1.60 – 1.52 (m, 2H), 1.49 – 1.41 (m, 2H), 1.38 – 1.31 (m, 2H), 1.30 – 1.22 (m, 2H), 0.91 (t,  $J = 7.4$  Hz, 3H), 0.87 (t,  $J = 7.3$  Hz, 3H).  **$^{13}C$  NMR** (125 MHz,  $CDCl_3$ )  $\delta$  161.99, 161.77 (d,  $J_{CF} = 247.9$  Hz), 147.26 (d,  $J_{CF} = 3.3$  Hz), 146.94, 144.52, 144.43, 142.43, 142.28, 142.13, 139.72 (d,  $J_{CF} = 2.5$  Hz), 137.00, 134.08, 131.21, 129.54, 129.29, 129.13 (d,  $J_{CF} = 9.3$  Hz), 128.57, 128.14, 126.51 (d,  $J_{CF} = 2.9$  Hz), 122.76 (d,  $J_{CF} = 14.7$  Hz), 114.77 (d,  $J_{CF} = 22.7$  Hz), 35.39, 35.30, 35.03 (d,  $J_{CF} = 4.7$  Hz), 33.44, 33.25, 22.37, 22.37, 13.96, 13.94.  **$^{19}F$  NMR** (471 MHz,  $CDCl_3$ )  $\delta$  -115.89. **HRMS (ESI)** calcd for  $C_{34}H_{36}FN_3ONa$   $[M+Na]^+$ : 544.2735, found: 544.2732. **FTIR** (KBr,  $cm^{-1}$ ) 2965.42, 2833.64, 2715.89, 1597.20, 1364.49, 1064.49, 772.90.

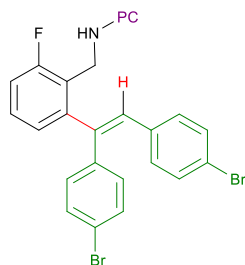

**(E)-N-(2-(1,2-bis(4-bromophenyl)vinyl)-6-fluorobenzyl)pyrazine-2-carboxamide (3e)** Following the general procedure 1, **3e** was obtained as a white solid (64.4 mg, 76% yield, m.p. = 155.7  $^{\circ}C$ ).  **$^1H$  NMR** (500 MHz,  $CDCl_3$ )  $\delta$  9.32 (s, 1H), 8.71 (s, 1H), 8.47 (s, 1H), 7.39 (s, 1H), 7.36 – 7.26 (m, 5H), 7.17 (d,  $J = 7.5$  Hz, 1H), 7.11 (t,  $J = 8.9$  Hz, 1H), 7.06 – 7.01 (m, 2H), 7.02 – 6.96 (m, 2H), 6.64 (s, 1H), 4.56 (d,  $J = 4.7$  Hz, 2H).  **$^{13}C$  NMR** (125 MHz,  $CDCl_3$ )  $\delta$  162.02, 162.02 (d,  $J_{CF} = 248.6$  Hz), 147.18, 146.03 (d,  $J_{CF} = 3.5$  Hz), 144.35, 144.14, 142.49, 140.14 (d,

$J_{CF} = 2.4$  Hz), 138.37, 135.17, 131.99, 131.51, 131.39, 130.91, 130.87, 129.50 (d,  $J_{CF} = 9.2$  Hz), 126.41 (d,  $J_{CF} = 2.7$  Hz), 122.67 (d,  $J_{CF} = 15.1$  Hz), 122.16, 121.54, 115.40 (d,  $J_{CF} = 22.5$  Hz), 35.15 (d,  $J_{CF} = 4.5$  Hz).  **$^{19}\text{F}$  NMR** (471 MHz,  $\text{CDCl}_3$ )  $\delta$  -115.29. **HRMS (ESI)** calcd for  $\text{C}_{26}\text{H}_{18}\text{Br}_2\text{FN}_3\text{ONa}$   $[\text{M}+\text{Na}]^+$ : 587.9693, found: 587.9701. **FTIR** (KBr,  $\text{cm}^{-1}$ ) 2965.55, 2830.97, 2713.22, 2357.15, 1611.36, 1361.83, 1070.24, 775.85.

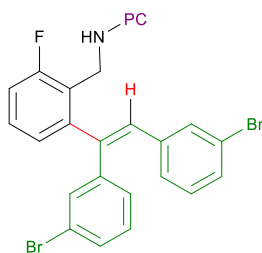

**(E)-N-(2-(1,2-Bis (3-bromophenyl)vinyl)-6-fluorobenzyl)pyrazine-2-carboxamide (3f)** Following the general procedure 1 at the conditions of  $140^\circ\text{C}$ , **3f** was obtained as a yellow solid (72.0 mg, 85% yield, m.p. =  $48.3^\circ\text{C}$ ).  **$^1\text{H}$  NMR** (500 MHz,  $\text{CDCl}_3$ )  $\delta$  9.33 (s, 1H), 8.77 – 8.65 (m, 1H), 8.49 (s, 1H), 7.59 (s, 1H), 7.38 – 7.29 (m, 2H), 7.27 (s, 1H), 7.24 (d,  $J = 7.1$  Hz, 2H), 7.17 – 7.09 (m, 3H), 7.08 – 6.98 (m, 3H), 6.66 (s, 1H), 4.59 (d,  $J = 5.5$  Hz, 2H).  **$^{13}\text{C}$  NMR** (125 MHz,  $\text{CDCl}_3$ )  $\delta$  162.03, 161.91 (d,  $J_{CF} = 248.4$  Hz), 147.21, 145.43 (d,  $J_{CF} = 3.3$  Hz), 144.33, 144.19, 142.41, 141.16, 140.44 (d,  $J_{CF} = 2.6$  Hz), 138.19, 132.33 (d,  $J_{CF} = 2.3$  Hz), 131.11, 131.02, 130.57, 130.12, 129.76, 129.57, 129.49, 128.51, 127.84, 126.44 (d,  $J_{CF} = 3.0$  Hz), 122.83, 122.71, 122.30, 115.52 (d,  $J_{CF} = 22.6$  Hz), 34.97 (d,  $J_{CF} = 4.8$  Hz).  **$^{19}\text{F}$  NMR** (471 MHz,  $\text{CDCl}_3$ )  $\delta$  -115.30. **HRMS (ESI)** calcd for  $\text{C}_{26}\text{H}_{18}\text{Br}_2\text{FN}_3\text{ONa}$   $[\text{M}+\text{Na}]^+$ : 587.9693, found: 587.9700. **FTIR** (KBr,  $\text{cm}^{-1}$ ) 2965.42, 2828.04, 2713.08, 1600.00, 1370.09, 1075.70, 781.31.

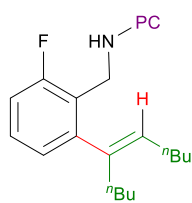

**(E)-N-(2-(Dec-5-en-5-yl)-6-fluorobenzyl)pyrazine-2-carboxamide (3g)** Following the general procedure 1 with the  $[\text{Rh}(\text{cod})\text{Cl}]_2$  (4 mol %),  $\text{AgSbF}_6$  (10 mol %) under  $\text{O}_2$  at  $140^\circ\text{C}$  for 48 h, **3g** was obtained as a yellow liquid (37.1 mg, 67% yield).  **$^1\text{H}$  NMR** (500 MHz,  $\text{CDCl}_3$ )  $\delta$  9.42 (s, 1H), 8.72 (d,  $J = 2.4$  Hz, 1H), 8.47 (dd,  $J = 2.3, 1.5$  Hz, 1H), 7.91 (s, 1H), 7.26 – 7.20 (m, 1H), 6.99 (t,  $J = 8.6$  Hz, 1H), 6.94 (d,  $J = 7.6$  Hz, 1H), 5.32 (t,  $J = 7.2$  Hz, 1H), 4.71 (d,  $J = 6.3$  Hz, 2H), 2.40 – 2.34 (m, 2H), 2.19 (q,  $J = 7.2$

Hz, 2H), 1.41 – 1.30 (m, 4H), 1.30 – 1.21 (m, 4H), 0.87 (t,  $J = 7.1$  Hz, 3H), 0.82 (t,  $J = 6.9$  Hz, 3H). **<sup>13</sup>C NMR** (125 MHz, CDCl<sub>3</sub>)  $\delta$  162.15, 161.91 (d,  $J_{CF} = 247.1$  Hz), 147.54, 147.12, 144.54, 144.43, 142.45, 138.29 (d,  $J_{CF} = 2.2$  Hz), 131.93, 128.77 (d,  $J_{CF} = 9.3$  Hz), 125.22 (d,  $J_{CF} = 2.9$  Hz), 121.97 (d,  $J_{CF} = 14.3$  Hz), 113.59 (d,  $J_{CF} = 22.2$  Hz), 35.49 (d,  $J_{CF} = 3.9$  Hz), 32.06, 31.84, 30.35, 27.85, 22.78, 22.44, 13.97, 13.89. **<sup>19</sup>F NMR** (471 MHz, CDCl<sub>3</sub>)  $\delta$  -116.21. **HRMS (ESI)** calcd for C<sub>22</sub>H<sub>28</sub>FN<sub>3</sub>ONa [M+Na]<sup>+</sup>: 392.2109, found: 392.2114. **FTIR** (KBr, cm<sup>-1</sup>) 2951.40, 2836.45, 2715.89, 1588.79, 1364.49, 1072.90, 781.31.

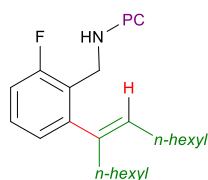

**(E)-N-(2-fluoro-6-(tetradec-7-en-7-yl)benzyl)pyrazine-2-carboxamide (3h)** Following the general procedure 1 with the [Rh(cod)Cl]<sub>2</sub> (4 mol %), AgSbF<sub>6</sub> (10 mol %) under O<sub>2</sub> at 140 °C for

48 h., **3h** was obtained as a yellow liquid (48.4 mg, 67% yield). **<sup>1</sup>H NMR** (500 MHz, CDCl<sub>3</sub>)  $\delta$  9.45 – 9.40 (m, 1H), 8.74 – 8.70 (m, 1H), 8.47 (dd,  $J = 2.3, 1.5$  Hz, 1H), 7.91 (s, 1H), 7.26 – 7.20 (m, 1H), 6.99 (t,  $J = 9.0$  Hz, 1H), 6.94 (d,  $J = 7.6$  Hz, 1H), 5.32 (t,  $J = 7.2$  Hz, 1H), 4.71 (d,  $J = 4.8$  Hz, 2H), 2.37 (t,  $J = 7.1$  Hz, 2H), 2.18 (q,  $J = 7.3$  Hz, 2H), 1.43 – 1.36 (m, 2H), 1.35 – 1.29 (m, 2H), 1.28 – 1.15 (m, 12H), 0.86 (t,  $J = 6.9$  Hz, 3H), 0.82 (t,  $J = 7.0$  Hz, 3H). **<sup>13</sup>C NMR** (125 MHz, CDCl<sub>3</sub>)  $\delta$  162.13, 161.91 (d,  $J_{CF} = 247.1$  Hz), 147.52 (d,  $J_{CF} = 3.3$  Hz), 147.12, 144.53, 144.44, 142.43, 138.30 (d,  $J_{CF} = 2.1$  Hz), 131.96, 128.76 (d,  $J_{CF} = 9.4$  Hz), 125.21 (d,  $J_{CF} = 2.9$  Hz), 121.97 (d,  $J_{CF} = 14.2$  Hz), 113.58 (d,  $J_{CF} = 22.2$  Hz), 35.48 (d,  $J_{CF} = 3.9$  Hz), 32.32, 31.73, 31.64, 29.64, 29.37, 29.07, 28.16, 28.13, 22.60, 22.56, 14.07, 14.02. **<sup>19</sup>F NMR** (471 MHz, CDCl<sub>3</sub>)  $\delta$  -116.19. **HRMS (ESI)** calcd for C<sub>26</sub>H<sub>36</sub>FN<sub>3</sub>ONa [M+Na]<sup>+</sup>: 448.2735, found: 448.2736. **FTIR** (KBr, cm<sup>-1</sup>) 2962.62, 2828.04, 2713.08, 1594.39, 1375.70, 1084.11, 778.50.

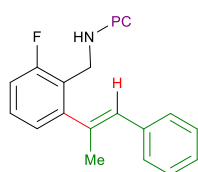

**(E)-N-(2-Fluoro-6-(1-phenylprop-1-en-2-yl)benzyl)pyrazine-2-carboxamide (3i)** Following the general procedure 1 at the conditions of 140°C, **3i** was obtained as a yellow solid (27.1 mg, 52%

yield, m.p. = 79.6 °C). **<sup>1</sup>H NMR** (500 MHz, CDCl<sub>3</sub>) δ 9.41 – 9.37 (m, 1H), 8.70 (d, *J* = 2.4 Hz, 1H), 8.45 (d, *J* = 2.3 Hz, 1H), 8.10 (s, 1H), 7.42 – 7.34 (m, 4H), 7.32 – 7.27 (m, 1H), 7.27 – 7.23 (m, 1H), 7.08 (d, *J* = 7.6 Hz, 1H), 7.04 (t, *J* = 9.1 Hz, 1H), 6.43 (s, 1H), 4.83 (d, *J* = 5.1 Hz, 2H), 2.24 (s, 3H). **<sup>13</sup>C NMR** (125 MHz, CDCl<sub>3</sub>) δ 162.31, 161.90 (d, *J*<sub>CF</sub> = 247.1 Hz), 148.36 (d, *J*<sub>CF</sub> = 3.5 Hz), 147.18, 144.46, 144.42, 142.49, 137.20, 136.56 (d, *J*<sub>CF</sub> = 2.3 Hz), 130.81, 129.24 (d, *J*<sub>CF</sub> = 9.4 Hz), 128.99, 128.27, 126.88, 124.42 (d, *J*<sub>CF</sub> = 3.0 Hz), 121.80 (d, *J*<sub>CF</sub> = 14.4 Hz), 114.06 (d, *J*<sub>CF</sub> = 22.3 Hz), 35.32 (d, *J*<sub>CF</sub> = 4.1 Hz), 20.49. **<sup>19</sup>F NMR** (471 MHz, CDCl<sub>3</sub>) δ -116.12. **HRMS (ESI)** calcd for C<sub>21</sub>H<sub>18</sub>FN<sub>3</sub>ONa [M+Na]<sup>+</sup>: 370.1326, found: 370.1335. **FTIR** (KBr, cm<sup>-1</sup>) 2959.81, 2833.64, 2715.89, 1597.20, 1364.49, 1072.90, 781.31.

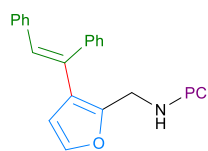

**(E)-N-((3-(1,2-Diphenylvinyl)furan-2-yl)methyl)pyrazine-2-carboxamide (3j)** Following the general procedure 1, 3j was obtained as a yellow solid (30.3 mg, 53% yield, m.p. = 143.2 °C). **<sup>1</sup>H NMR**

(500 MHz, CDCl<sub>3</sub>) δ 9.37 (d, *J* = 1.1 Hz, 1H), 8.72 (d, *J* = 2.4 Hz, 1H), 8.53 – 8.47 (m, 1H), 7.78 (s, 1H), 7.36 (d, *J* = 1.9 Hz, 1H), 7.35 – 7.30 (m, 3H), 7.29 – 7.26 (m, 2H), 7.14 – 7.08 (m, 3H), 7.03 – 7.00 (m, 2H), 6.80 (s, 1H), 6.41 (d, *J* = 1.9 Hz, 1H), 4.31 (d, *J* = 5.8 Hz, 2H). **<sup>13</sup>C NMR** (125 MHz, CDCl<sub>3</sub>) δ 162.49, 147.39, 147.25, 144.51, 144.33, 142.49, 141.75, 139.85, 136.73, 133.85, 129.67, 129.38, 128.88, 128.78, 128.00, 127.88, 126.87, 126.37, 111.45, 35.55. **HRMS (ESI)** calcd for C<sub>24</sub>H<sub>19</sub>N<sub>3</sub>O<sub>2</sub>Na [M+Na]<sup>+</sup>: 404.1369, found: 404.1366. **FTIR** (KBr, cm<sup>-1</sup>) 2957.01, 2830.84, 2718.69, 1602.80, 1367.29, 1070.09, 784.11.

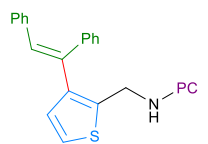

**(E)-N-((3-(1,2-Diphenylvinyl)thiophen-2-yl)methyl)pyrazine-2-carboxamide (3k)** Following the general procedure 1, 3k was obtained as a yellow solid (48.8 mg, 82% yield, m.p. = 50.3

°C). **<sup>1</sup>H NMR** (500 MHz, CDCl<sub>3</sub>) δ 9.38 (d, *J* = 1.4 Hz, 1H), 8.73 (d, *J* = 2.4 Hz, 1H), 8.50 (dd, *J* = 2.4, 1.5 Hz, 1H), 7.85 (s, 1H), 7.32 – 7.26 (m, 3H), 7.25 – 7.21 (m, 2H), 7.19 – 7.12 (m, 4H), 7.07 (dd, *J* = 7.3, 2.0 Hz, 2H), 6.90 (d, *J* = 5.2 Hz, 1H), 6.75 (s,

1H), 4.64 (d,  $J = 6.0$  Hz, 2H). **<sup>13</sup>C NMR** (125 MHz, CDCl<sub>3</sub>)  $\delta$  162.53, 147.30, 144.48, 144.25, 142.74, 142.51, 140.24, 136.82, 136.71, 136.23, 130.59, 129.77, 129.44, 128.72, 128.08, 127.71, 127.05, 123.64, 36.93. **HRMS (ESI)** calcd for C<sub>24</sub>H<sub>19</sub>N<sub>3</sub>OSNa [M+Na]<sup>+</sup>: 420.1141, found: 420.1145. **FTIR** (KBr, cm<sup>-1</sup>) 2951.40, 2825.23, 2718.69, 1602.80, 1372.90, 1199.07, 1075.70, 778.50, 551.40.

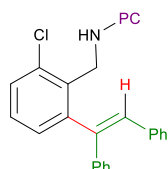

**(E)-N-(2-Chloro-6-(1,2-diphenylvinyl)benzyl)pyrazine-2-carboxamide (3l)** Following the general procedure 1, **3l** was obtained as a white solid (47.2 mg, 74% yield, m.p. = 151.7 °C). **<sup>1</sup>H NMR** (500 MHz, CDCl<sub>3</sub>)  $\delta$  9.30 (s, 1H), 8.67 (d,  $J = 2.1$  Hz, 1H), 8.40 (s, 1H), 7.41 (d,  $J = 7.7$  Hz, 1H), 7.37 (s, 1H), 7.36 – 7.28 (m, 2H), 7.20 – 7.10 (m, 9H), 7.03 (t,  $J = 7.1$  Hz, 1H), 6.69 (s, 1H), 4.70 (d,  $J = 5.3$  Hz, 2H). **<sup>13</sup>C NMR** (125 MHz, CDCl<sub>3</sub>)  $\delta$  161.99, 147.24, 147.00, 144.37, 144.30, 142.23, 141.03, 139.61, 136.59, 136.03, 132.96, 131.60, 129.76, 129.56, 129.40, 129.29, 129.08, 128.59, 128.15, 127.60, 127.33, 39.33. **HRMS (ESI)** calcd for C<sub>26</sub>H<sub>20</sub>ClN<sub>3</sub>ONa [M+Na]<sup>+</sup>: 448.1187, found: 448.1190. **FTIR** (KBr, cm<sup>-1</sup>) 2959.95, 2830.97, 2716.02, 1605.75, 1359.03, 1078.65, 778.66.

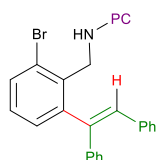

**(E)-N-(2-Bromo-6-(1,2-diphenylvinyl)benzyl)pyrazine-2-carboxamide (3m)** Following the general procedure 1, **3m** was obtained as a white solid (35.2 mg, 50% yield, m.p. = 143.6°C). **<sup>1</sup>H NMR** (500 MHz, CDCl<sub>3</sub>)  $\delta$  9.30 (s, 1H), 8.68 (d,  $J = 2.4$  Hz, 1H), 8.45 – 8.34 (m, 1H), 7.61 (d,  $J = 8.0$  Hz, 1H), 7.39 (d,  $J = 7.4$  Hz, 1H), 7.34 (s, 1H), 7.25 – 7.21 (m, 1H), 7.19 – 7.09 (m, 9H), 7.01 (t,  $J = 7.1$  Hz, 1H), 6.67 (s, 1H), 4.70 (d,  $J = 5.2$  Hz, 2H). **<sup>13</sup>C NMR** (125 MHz, CDCl<sub>3</sub>)  $\delta$  161.95, 147.42, 146.99, 144.34, 144.29, 142.22, 141.17, 139.56, 136.55, 134.49, 132.71, 131.57, 130.23, 129.75, 129.41, 129.38, 128.56, 128.14, 127.57, 127.33, 126.52, 41.94. **HRMS (ESI)** calcd for C<sub>26</sub>H<sub>20</sub>BrN<sub>3</sub>ONa [M+Na]<sup>+</sup>: 492.0682, found: 492.0700. **FTIR** (KBr, cm<sup>-1</sup>) 2959.95, 2830.97, 2716.02, 1605.75, 1359.03, 1078.65, 778.66.

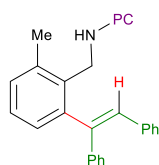

**(E)-N-(2-(1,2-Diphenylvinyl)-6-methylbenzyl)pyrazine-2-carboxamide (3n)** Following the general procedure 1, **3n** was obtained as a white solid (35.9 mg, 59% yield, m.p. = 154.7 °C). **<sup>1</sup>H NMR** (500 MHz, CDCl<sub>3</sub>) δ 9.29 (s, 1H), 8.67 (d, *J* = 2.4 Hz, 1H), 8.37 (dd, *J* = 2.3, 1.6 Hz, 1H), 7.33 – 7.27 (m, 2H), 7.23 – 7.09 (m, 11H), 7.04 – 6.99 (m, 1H), 6.70 (s, 1H), 4.56 (d, *J* = 5.4 Hz, 2H), 2.37 (s, 3H). **<sup>13</sup>C NMR** (125 MHz, CDCl<sub>3</sub>) δ 162.08, 146.95, 145.67, 144.35, 144.20, 142.47, 142.17, 140.31, 138.59, 136.96, 133.15, 130.73, 130.33, 129.71, 129.37, 128.79, 128.55, 128.09, 127.99, 127.37, 127.08, 38.94, 19.60. **HRMS (ESI)** calcd for C<sub>27</sub>H<sub>23</sub>N<sub>3</sub>ONa [M+Na]<sup>+</sup>: 428.1733, found: 428.1732. **FTIR** (KBr, cm<sup>-1</sup>) 2954.21, 2828.04, 2713.08, 1611.21, 1370.09, 1075.70, 778.50.

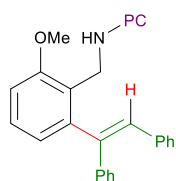

**(E)-N-(2-(1,2-diphenylvinyl)-6-methoxybenzyl)pyrazine-2-carboxamide (3o)** Following the general procedure 1, **3o** was obtained as a yellow solid (53.7 mg, 85% yield, m.p. = 123.9 °C). **<sup>1</sup>H NMR** (500 MHz, CDCl<sub>3</sub>) δ 9.31 (d, *J* = 1.3 Hz, 1H), 8.67 (d, *J* = 2.4 Hz, 1H), 8.45 – 8.38 (m, 1H), 7.62 (s, 1H), 7.31 (t, *J* = 8.0 Hz, 1H), 7.18 (t, *J* = 7.8 Hz, 3H), 7.13 (t, *J* = 8.1 Hz, 6H), 7.03 (t, *J* = 7.3 Hz, 1H), 7.00 (d, *J* = 7.6 Hz, 1H), 6.91 (d, *J* = 8.2 Hz, 1H), 6.66 (s, 1H), 4.64 (d, *J* = 5.4 Hz, 2H), 3.87 (s, 3H). **<sup>13</sup>C NMR** (125 MHz, CDCl<sub>3</sub>) δ 161.90, 158.56, 146.74, 146.27, 144.88, 144.31, 142.25, 141.36, 140.14, 136.97, 131.07, 129.77, 129.41, 128.69, 128.37, 128.04, 127.25, 127.01, 123.55, 123.07, 109.93, 55.80, 36.32. **HRMS (ESI)** calcd for C<sub>27</sub>H<sub>23</sub>N<sub>3</sub>O<sub>2</sub>Na [M+Na]<sup>+</sup>: 444.1682, found: 444.1688. **FTIR** (KBr, cm<sup>-1</sup>) 2954.21, 2828.04, 2713.08, 1602.80, 1370.09, 1070.09, 775.70.

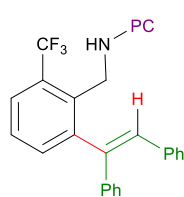

**(E)-N-(2-(1,2-Diphenylvinyl)-6-(trifluoromethyl)benzyl)pyrazine-2-carboxamide (3p)** Following the general procedure 1, **3p** was obtained as a yellow solid (28.9 mg, 42% yield, m.p. = 121.1°C). **<sup>1</sup>H NMR** (500 MHz, CDCl<sub>3</sub>) δ 9.28 (d, *J* = 1.2 Hz, 1H), 8.69 (d, *J* = 2.4



Hz, 1H), 8.39 (dd,  $J = 2.3, 1.5$  Hz, 1H), 7.74 (d,  $J = 7.8$  Hz, 1H), 7.66 (d,  $J = 7.3$  Hz, 1H), 7.52 (t,  $J = 7.7$  Hz, 2H), 7.18 – 7.13 (m, 5H), 7.12 – 7.04 (m, 4H), 6.98 (t,  $J = 7.3$  Hz, 1H), 6.66 (s, 1H), 4.72 (d,  $J = 5.0$  Hz, 2H).  **$^{13}\text{C}$  NMR** (125 MHz,  $\text{CDCl}_3$ )  $\delta$  161.68, 147.51, 147.03, 144.27, 142.24, 140.50, 138.78, 136.41, 134.98, 133.14, 132.08, 130.56 (q,  $J_{CF} = 30.1$  Hz), 129.59, 129.30, 128.46, 128.27, 128.14, 127.62, 127.41, 125.86 (q,  $J_{CF} = 5.9$  Hz), 124.21 (d,  $J_{CF} = 274.3$  Hz), 38.11.  **$^{19}\text{F}$  NMR** (471 MHz,  $\text{CDCl}_3$ )  $\delta$  -58.66. **HRMS (ESI)** calcd for  $\text{C}_{27}\text{H}_{20}\text{F}_3\text{N}_3\text{ONa}$   $[\text{M}+\text{Na}]^+$ : 482.1451, found: 482.1457. **FTIR** (KBr,  $\text{cm}^{-1}$ ) 2963.28, 2831.62, 2725.18, 1601.88, 1360.98, 1192.91, 1078.05, 775.52, 565.43.

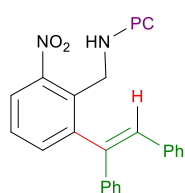

**(E)-N-(2-(1,2-Diphenylvinyl)-6-nitrobenzyl)pyrazine-2-carboxamide (3q)** Following the general procedure 1, **3q** was obtained as a

yellow solid (28.1 mg, 43% yield, m.p. = 80.6 °C).  **$^1\text{H}$  NMR** (500 MHz,  $\text{CDCl}_3$ )  $\delta$  9.29 (d,  $J = 1.3$  Hz, 1H), 8.71 (d,  $J = 2.4$  Hz, 1H),

8.52 – 8.43 (m, 1H), 8.05 (s, 1H), 7.85 (dd,  $J = 8.1, 1.2$  Hz, 1H), 7.62 (dd,  $J = 7.7, 1.2$  Hz, 1H), 7.48 (t,  $J = 7.9$  Hz, 1H), 7.26 – 7.22 (m, 2H), 7.21 – 7.15 (m, 5H), 7.15 – 7.08 (m, 3H), 6.66 (s, 1H), 4.80 (d,  $J = 5.8$  Hz, 2H).  **$^{13}\text{C}$  NMR** (125 MHz,  $\text{CDCl}_3$ )  $\delta$  162.21, 151.33, 147.68, 147.19, 144.29, 144.21, 142.51, 139.38, 138.91, 136.26, 135.45, 133.02, 130.03, 129.82, 129.41, 128.60, 128.52, 128.20, 127.85, 127.58, 123.86, 37.96. **HRMS (ESI)** calcd for  $\text{C}_{26}\text{H}_{20}\text{N}_4\text{O}_3\text{Na}$   $[\text{M}+\text{Na}]^+$ : 459.1428, found: 459.1426. **FTIR** (KBr,  $\text{cm}^{-1}$ ) 2954.21, 2833.64, 2715.89, 1600.00, 1361.8, 1081.31, 775.70, 573.83.

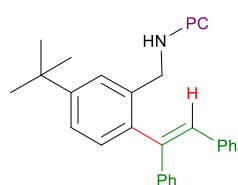

**(E)-N-(5-(Tert-butyl)-2-(1,2-diphenylvinyl)benzyl)pyrazine-2-carboxamide (3r)** Following the general procedure 1 at the

conditions of 140°C, **3r** was obtained as a white solid (61.0 mg, 91% yield, m.p. = 138.7 °C).  **$^1\text{H}$  NMR** (500 MHz,  $\text{CDCl}_3$ )  $\delta$  9.34

(s, 1H), 8.72 – 8.65 (m, 1H), 8.43 (s, 1H), 7.69 (s, 1H), 7.40 (s, 1H), 7.34 (q,  $J = 8.2$  Hz, 2H), 7.22 – 7.13 (m, 8H), 7.11 (d,  $J = 7.7$  Hz, 2H), 6.71 (s, 1H), 4.44 (d,  $J = 5.8$

Hz, 2H), 1.33 (s, 9H). **<sup>13</sup>C NMR** (125 MHz, CDCl<sub>3</sub>) δ 162.30, 151.22, 147.02, 144.61, 144.38, 142.31, 141.88, 141.14, 139.95, 137.08, 134.96, 130.92, 130.63, 129.78, 129.41, 128.51, 128.06, 127.49, 127.07, 127.01, 124.81, 42.19, 34.60, 31.36. **HRMS (ESI)** calcd for C<sub>30</sub>H<sub>29</sub>N<sub>3</sub>ONa [M+Na]<sup>+</sup>: 470.2203, found: 470.2196. **FTIR** (KBr, cm<sup>-1</sup>) 2965.42, 2836.45, 2721.50, 1591.59, 1364.49, 1070.09, 775.70.

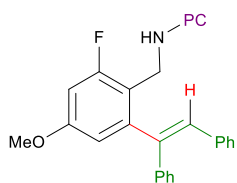

**(E)-N-(2-(1,2-Diphenylvinyl)-6-fluoro-4-methoxybenzyl)pyrazine-2-carboxamide (3s)** Following the general procedure 1 at the conditions of 140°C, **3s** was obtained as a white solid (42.2 mg, 65% yield, m.p. = 152.9 °C). **<sup>1</sup>H NMR** (500 MHz, CDCl<sub>3</sub>) δ

9.30 (s, 1H), 8.68 (d, *J* = 2.4 Hz, 1H), 8.44 – 8.37 (m, 1H), 7.44 (s, 1H), 7.23 – 7.14 (m, 7H), 7.14 – 7.06 (m, 3H), 6.78 (d, *J* = 2.0 Hz, 1H), 6.72 (s, 1H), 6.65 (dd, *J* = 11.4, 2.5 Hz, 1H), 4.49 (d, *J* = 4.5 Hz, 2H), 3.81 (s, 3H). **<sup>13</sup>C NMR** (125 MHz, CDCl<sub>3</sub>) δ 162.44 (d, *J*<sub>CF</sub> = 247.2 Hz), 161.97, 160.04 (d, *J*<sub>CF</sub> = 12.4 Hz), 147.26 (d, *J*<sub>CF</sub> = 5.3 Hz), 146.95, 144.48, 144.28, 142.26, 140.75 (d, *J*<sub>CF</sub> = 3.0 Hz), 139.35, 136.54, 131.46, 129.68, 129.41, 128.61, 128.13, 127.67, 127.33, 114.74 (d, *J*<sub>CF</sub> = 15.6 Hz), 112.51 (d, *J*<sub>CF</sub> = 2.4 Hz), 100.95 (d, *J*<sub>CF</sub> = 26.5 Hz), 55.67, 34.68 (d, *J*<sub>CF</sub> = 4.4 Hz). **<sup>19</sup>F NMR** (471 MHz, CDCl<sub>3</sub>) δ -113.59. **HRMS (ESI)** calcd for C<sub>27</sub>H<sub>22</sub>FN<sub>3</sub>O<sub>2</sub>Na [M+Na]<sup>+</sup>: 462.1588, found: 462.1585. **FTIR** (KBr, cm<sup>-1</sup>) 2954.21, 2828.04, 2718.69, 1600.00, 1364.49, 1072.90, 775.70.

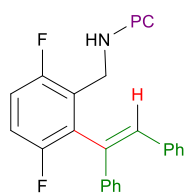

**(E)-N-(2-(1,2-Diphenylvinyl)-3,6-difluorobenzyl)pyrazine-2-carboxamide (3t)** Following the general procedure 1 at the conditions of 140°C, **3t** was obtained as a white solid (59.6 mg, 93% yield, m.p. = 125.1 °C). **<sup>1</sup>H NMR** (500 MHz, CDCl<sub>3</sub>) δ 9.33 (d, *J* = 1.3 Hz, 1H),

8.70 (d, *J* = 2.4 Hz, 1H), 8.41 (dd, *J* = 2.3, 1.6 Hz, 1H), 7.71 (s, 1H), 7.24 – 7.21 (m, 2H), 7.20 – 7.11 (m, 8H), 7.11 – 7.03 (m, 2H), 6.71 (s, 1H), 4.69 (s, 2H). **<sup>13</sup>C NMR** (125 MHz, CDCl<sub>3</sub>) δ 162.13, 157.60 (dd, *J*<sub>CF</sub> = 244.4, 2.4 Hz), 156.29 (dd, *J*<sub>CF</sub> = 241.5, 2.3 Hz), 147.17, 144.40, 144.29, 142.30, 138.63, 136.10, 133.73, 133.45 (dd,

$J_{CF} = 19.0, 3.5$  Hz), 133.02 (d,  $J_{CF} = 1.6$  Hz), 129.43, 129.36, 128.54, 128.17, 127.69, 127.57, 124.65 (dd,  $J_{CF} = 16.7, 2.2$  Hz), 116.30 (dd,  $J_{CF} = 26.0, 9.3$  Hz), 115.67 (dd,  $J_{CF} = 25.2, 8.7$  Hz), 35.02 (d,  $J_{CF} = 5.4$  Hz).  **$^{19}\text{F}$  NMR** (471 MHz,  $\text{CDCl}_3$ )  $\delta$  -118.83 (d,  $J_{FF} = 17.5$  Hz), -120.62 (d,  $J_{FF} = 17.5$  Hz). **HRMS (ESI)** calcd for  $\text{C}_{26}\text{H}_{19}\text{F}_2\text{N}_3\text{ONa}$   $[\text{M}+\text{Na}]^+$ : 450.1388, found: 450.1381. **FTIR** (KBr,  $\text{cm}^{-1}$ ) 2957.01, 2839.25, 2715.89, 1608.41, 1358.88, 1078.50, 775.70.

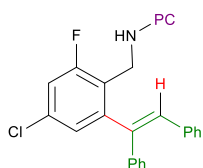

**(E)-N-(4-Chloro-2-(1,2-diphenylvinyl)-6-fluorobenzyl)pyrazine-**

**2-carboxamide (3u)** Following the general procedure 1 at the

conditions of  $140^\circ\text{C}$ , **3u** was obtained as a white solid (54.5 mg, 82%

yield, m.p. =  $224.7^\circ\text{C}$ ).  **$^1\text{H}$  NMR** (500 MHz,  $\text{CDCl}_3$ )  $\delta$  9.31 (s, 1H), 8.70 (d,  $J = 2.4$  Hz, 1H), 8.45 – 8.40 (m, 1H), 7.52 (s, 1H), 7.24 – 7.17 (m, 8H), 7.16 – 7.09 (m, 4H), 6.71 (s, 1H), 4.52 (d,  $J = 5.6$  Hz, 2H).  **$^{13}\text{C}$  NMR** (125 MHz,  $\text{CDCl}_3$ )  $\delta$  162.08, 161.61 (d,  $J_{CF} = 251.4$  Hz), 147.68 (d,  $J_{CF} = 4.2$  Hz), 147.14, 144.36, 144.27, 142.27, 139.46 (d,  $J_{CF} = 2.7$  Hz), 138.92, 136.20, 134.26 (d,  $J_{CF} = 12.0$  Hz), 132.35, 129.69, 129.43, 128.77, 128.19, 127.94, 127.58, 126.69 (d,  $J_{CF} = 3.1$  Hz), 121.69 (d,  $J_{CF} = 15.0$  Hz), 115.67 (d,  $J_{CF} = 26.4$  Hz), 34.61 (d,  $J_{CF} = 4.4$  Hz).  **$^{19}\text{F}$  NMR** (471 MHz,  $\text{CDCl}_3$ )  $\delta$  -112.92. **HRMS (ESI)** calcd for  $\text{C}_{26}\text{H}_{19}\text{ClFN}_3\text{ONa}$   $[\text{M}+\text{Na}]^+$ : 466.1093, found: 466.1088. **FTIR** (KBr,  $\text{cm}^{-1}$ ) 2968.22, 2830.84, 2715.89, 1594.39, 1367.29, 1081.31, 778.50.

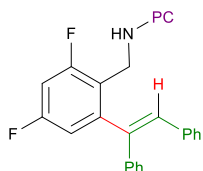

**(E)-N-(2-(1,2-Diphenylvinyl)-4,6-difluorobenzyl)pyrazine-2-carb**

**oxamide (3v)** Following the general procedure 1 at the conditions

of  $140^\circ\text{C}$ , **3v** was obtained as a white solid (46.1 mg, 72% yield,

m.p. =  $139.7^\circ\text{C}$ ).  **$^1\text{H}$  NMR** (500 MHz,  $\text{CDCl}_3$ )  $\delta$  9.32 (s, 1H), 8.70

(d,  $J = 2.3$  Hz, 1H), 8.42 (s, 1H), 7.51 (s, 1H), 7.22 – 7.16 (m, 7H), 7.15 – 7.09 (m, 3H), 6.96 (d,  $J = 8.8$  Hz, 1H), 6.87 – 6.81 (m, 1H), 6.71 (s, 1H), 4.53 (d,  $J = 5.0$  Hz, 2H).  **$^{13}\text{C}$  NMR** (125 MHz,  $\text{CDCl}_3$ ) 162.05, 162.03 (dd,  $J_{CF} = 250.1, 8.0$  Hz), 161.92 (dd,  $J_{CF} = 250.1, 7.0$  Hz), 147.86 (dd,  $J_{CF} = 9.1, 4.9$  Hz), 147.09, 144.35, 144.30,

142.25, 139.69, 138.97, 136.19, 132.20, 129.65, 129.41, 128.73, 128.17, 127.90, 127.55, 119.00 (dd,  $J_{CF} = 15.1, 3.9$  Hz), 113.68 (dd,  $J_{CF} = 21.3, 3.2$  Hz), 103.29 (dd,  $J_{CF} = 26.5, 25.4$  Hz), 34.56 (d,  $J_{CF} = 4.4$  Hz).  **$^{19}\text{F}$  NMR** (471 MHz,  $\text{CDCl}_3$ )  $\delta$  -110.38 (d,  $J_{FF} = 8.2$  Hz), -111.18 (d,  $J_{FF} = 8.1$  Hz). **HRMS (ESI)** calcd for  $\text{C}_{26}\text{H}_{19}\text{F}_2\text{N}_3\text{ONa}$   $[\text{M}+\text{Na}]^+$ : 450.1388, found: 450.1381. **FTIR** (KBr,  $\text{cm}^{-1}$ ) 2965.42, 2828.04, 2713.08, 1600.00, 1361.68, 1075.70, 772.90.

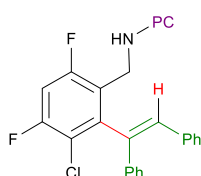

**(E)-N-(3-chloro-2-(1,2-diphenylvinyl)-4,6-difluorobenzyl)pyrazine-2-carboxamide (3w)** Following the general procedure 1 at the

conditions of  $140^\circ\text{C}$ , **3w** was obtained as a white solid (48.4 mg, 70% yield, m.p. =  $161.1^\circ\text{C}$ ).  **$^1\text{H}$  NMR** (500 MHz,  $\text{CDCl}_3$ )  $\delta$  9.32 (d,  $J =$

1.2 Hz, 1H), 8.70 (d,  $J = 2.4$  Hz, 1H), 8.45 – 8.33 (m, 1H), 7.61 (s, 1H), 7.24 – 7.18 (m, 7H), 7.18 – 7.10 (m, 3H), 6.99 (t,  $J = 8.9$  Hz, 1H), 6.68 (s, 1H), 4.73 – 4.59 (m, 2H).  **$^{13}\text{C}$  NMR** (125 MHz,  $\text{CDCl}_3$ )  $\delta$  162.10, 159.92 (dd,  $J_{CF} = 236.0, 11.9$  Hz), 157.92 (dd,  $J_{CF} = 238.0, 12.8$  Hz), 147.20, 145.99 (d,  $J_{CF} = 4.6$  Hz), 144.34, 144.17, 142.28, 137.43, 135.99, 135.58 (t,  $J_{CF} = 2.1$  Hz), 133.79, 129.42, 129.38, 128.55, 128.30, 127.94, 127.78, 120.76 (dd,  $J_{CF} = 15.7, 4.1$  Hz), 117.67 (dd,  $J_{CF} = 16.9, 4.2$  Hz), 104.35 (dd,  $J_{CF} = 27.8, 25.4$  Hz), 35.00 (d,  $J_{CF} = 3.7$  Hz).  **$^{19}\text{F}$  NMR** (471 MHz,  $\text{CDCl}_3$ )  $\delta$  -107.72 (d,  $J_{FF} = 8.0$  Hz), -112.71 (d,  $J_{FF} = 8.0$  Hz). **HRMS (ESI)** calcd for  $\text{C}_{26}\text{H}_{18}\text{ClF}_2\text{N}_3\text{ONa}$   $[\text{M}+\text{Na}]^+$ : 484.0999, found: 484.0992. **FTIR** (KBr,  $\text{cm}^{-1}$ ) 2957.01, 2828.04, 2724.30, 1608.41, 1370.09, 1207.48, 1070.09, 772.90, 565.42.

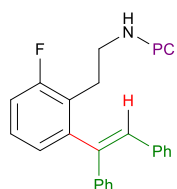

**(E)-N-(2-(1,2-Diphenylvinyl)-6-fluorophenethyl)pyrazine-2-carboxamide (3x)** Following the general procedure 1 at

the conditions of  $140^\circ\text{C}$ , **3x** was obtained as a yellow liquid (17.1 mg, 27% yield).  **$^1\text{H}$  NMR** (500 MHz,  $\text{CDCl}_3$ )  $\delta$  9.34 (s, 1H), 8.71 (d,  $J =$

2.3 Hz, 1H), 8.48 (s, 1H), 7.67 (s, 1H), 7.28 – 7.20 (m, 4H), 7.20 – 7.13 (m, 6H), 7.09 – 7.00 (m, 3H), 6.65 (s, 1H), 3.38 (q,  $J = 6.8$  Hz, 2H), 2.87 (t,  $J = 6.8$  Hz, 2H).  **$^{13}\text{C}$  NMR** (125 MHz,  $\text{CDCl}_3$ )  $\delta$  162.71, 161.84 (d,  $J_{CF} = 245.2$  Hz), 147.06, 146.53 (d,  $J_{CF}$

= 4.1 Hz), 144.53, 144.37, 142.47, 141.33 (d,  $J_{CF} = 2.5$  Hz), 139.79, 136.72, 131.20, 129.80, 129.38, 128.47, 128.11, 127.80 (d,  $J_{CF} = 9.2$  Hz), 127.69, 127.16, 126.54 (d,  $J_{CF} = 2.9$  Hz), 124.36 (d,  $J_{CF} = 15.5$  Hz), 114.66 (d,  $J_{CF} = 23.1$  Hz), 38.94, 26.62 (d,  $J_{CF} = 2.1$  Hz). **<sup>19</sup>F NMR** (471 MHz, CDCl<sub>3</sub>) δ -116.34. **HRMS (ESI)** calcd for C<sub>27</sub>H<sub>22</sub>FN<sub>3</sub>ONa [M+Na]<sup>+</sup>: 446.1639, found: 446.1634. **FTIR** (KBr, cm<sup>-1</sup>) 2959.81, 2833.64, 2724.30, 1600.00, 1370.09, 1070.09, 775.70.

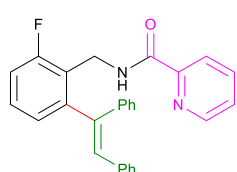

**(E)-N-(2-(1,2-Diphenylvinyl)-6-fluorobenzyl) picolinamide**

**(3aa)** Following the general procedure 1, **3aa** was obtained as a yellow solid (59.4 mg, 97% yield, m.p. = 45.3 °C). **<sup>1</sup>H NMR** (500 MHz, CDCl<sub>3</sub>) δ 8.45 (d,  $J = 4.1$  Hz, 1H), 8.12 (d,  $J = 7.3$  Hz, 1H), 7.93 (s, 1H), 7.76 (t,  $J = 7.7$  Hz, 1H), 7.37 – 7.33 (m, 1H), 7.32 – 7.26 (m, 1H), 7.24 – 7.10 (m, 11H), 7.05 (t,  $J = 8.9$  Hz, 1H), 6.71 (s, 1H), 4.58 (d, 2H). **<sup>13</sup>C NMR** (125 MHz, CDCl<sub>3</sub>) δ 163.46, 161.83 (d,  $J_{CF} = 247.9$  Hz), 149.87, 147.85, 146.76 (d,  $J_{CF} = 3.4$  Hz), 140.67 (d,  $J_{CF} = 2.5$  Hz), 139.55, 137.16, 136.77, 131.62, 129.78, 129.49, 128.99 (d,  $J_{CF} = 9.3$  Hz), 128.58, 128.09, 127.65, 127.20, 126.48 (d,  $J_{CF} = 2.9$  Hz), 125.97, 123.29 (d,  $J_{CF} = 14.8$  Hz), 122.16, 114.91 (d,  $J_{CF} = 22.8$  Hz), 34.95 (d,  $J_{CF} = 4.8$  Hz). **<sup>19</sup>F NMR** (471 MHz, CDCl<sub>3</sub>) δ -115.60. **HRMS (ESI)** calcd for C<sub>27</sub>H<sub>21</sub>FN<sub>2</sub>ONa [M+Na]<sup>+</sup>: 431.1530, found: 431.1531. **FTIR** (KBr, cm<sup>-1</sup>) 2957.01, 2828.04, 2718.69, 1600.00, 1364.49, 1210.28, 1078.50, 778.50, 576.64.

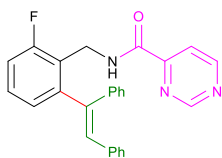

**(E)-N-(2-(1,2-Diphenylvinyl)-6-fluorobenzyl)pyrimidine-4-carb**

**oxamide (3bb)** Following the general procedure 1, **3bb** was obtained as a yellow liquid (54.6 mg, 89% yield). **<sup>1</sup>H NMR** (500 MHz, CDCl<sub>3</sub>) δ 9.06 – 9.01 (m, 1H), 8.81 (d,  $J = 5.0$  Hz, 1H), 7.94 (dd,  $J = 5.0, 1.4$  Hz, 1H), 7.68 (s, 1H), 7.27 – 7.19 (m, 1H), 7.13 – 7.09 (m, 5H), 7.09 – 7.06 (m, 3H), 7.05 – 7.02 (m, 3H), 6.99 (t,  $J = 8.9$  Hz, 1H), 6.62 (s, 1H), 4.48 (d,  $J = 6.5$  Hz, 2H). **<sup>13</sup>C NMR** (125 MHz, CDCl<sub>3</sub>) δ 161.78 (d,  $J_{CF} = 248.1$  Hz), 161.68, 159.05, 157.52, 156.15, 146.78 (d,  $J_{CF} = 3.3$  Hz), 140.52 (d,  $J_{CF} = 2.6$  Hz), 139.52, 136.60, 131.73,

129.73, 129.44, 129.31 (d,  $J_{CF} = 9.4$  Hz), 128.66, 128.15, 127.76, 127.34, 126.58 (d,  $J_{CF} = 3.0$  Hz), 122.58 (d,  $J_{CF} = 14.8$  Hz), 118.49, 115.00 (d,  $J_{CF} = 22.7$  Hz), 35.12 (d,  $J_{CF} = 4.9$  Hz).  **$^{19}\text{F}$  NMR** (471 MHz,  $\text{CDCl}_3$ )  $\delta$  -115.66. **HRMS (ESI)** calcd for  $\text{C}_{26}\text{H}_{20}\text{FN}_3\text{ONa}$   $[\text{M}+\text{Na}]^+$ : 432.1483, found: 432.1480. **FTIR** (KBr,  $\text{cm}^{-1}$ ) 2962.62, 2828.04, 2721.50, 1600.00, 1370.09, 1075.70, 772.90.

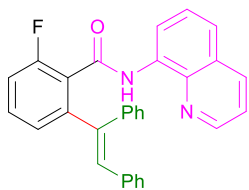

**(E)-2-(1,2-diphenylvinyl)-6-fluoro-N-(quinolin-8-yl)benzamide**

**de (3dd)** Following the general procedure 1, **3dd** was obtained

as a white solid (40.3 mg, 91% yield, m.p. = 89.4 °C).  **$^1\text{H}$  NMR** (500 MHz,  $\text{CDCl}_3$ )  $\delta$  9.95 (s, 1H), 8.74 (dd,  $J = 4.2, 1.7$  Hz, 1H),

8.60 (dd,  $J = 6.2, 2.7$  Hz, 1H), 8.12 (dd,  $J = 8.3, 1.7$  Hz, 1H), 7.47 – 7.39 (m, 4H), 7.25 (d,  $J = 1.0$  Hz, 1H), 7.18 – 7.14 (m, 1H), 7.15 – 7.08 (m, 2H), 7.04 – 6.96 (m, 7H), 6.94 – 6.89 (m, 2H).  **$^{13}\text{C}$  NMR** (125 MHz,  $\text{CDCl}_3$ )  $\delta$  162.81, 159.66 (d,  $J_{CF} = 249.6$  Hz), 147.99, 144.95 (d,  $J_{CF} = 2.9$  Hz), 140.47 (d,  $J_{CF} = 2.2$  Hz), 139.14, 138.31, 136.88, 136.19, 134.27, 131.54, 130.68 (d,  $J_{CF} = 8.9$  Hz), 130.45, 129.36, 128.07, 127.80, 127.76, 127.27, 126.96, 126.21 (d,  $J_{CF} = 3.0$  Hz), 125.53, 125.40, 121.67, 121.49, 116.66, 115.20 (d,  $J_{CF} = 22.2$  Hz).  **$^{19}\text{F}$  NMR** (471 MHz,  $\text{CDCl}_3$ )  $\delta$  -115.37. **HRMS (ESI)** calcd for  $\text{C}_{30}\text{H}_{21}\text{FN}_2\text{ONa}$   $[\text{M}+\text{Na}]^+$ : 467.1530, found: 467.1531. **FTIR** (KBr,  $\text{cm}^{-1}$ ) 3453.27, 2954.21, 2833.64, 2713.08, 2345.79, 1605.61, 1347.66, 1067.29, 772.90.

### 3.2 General Procedure 2 for Olefinic C-H Alkenylation

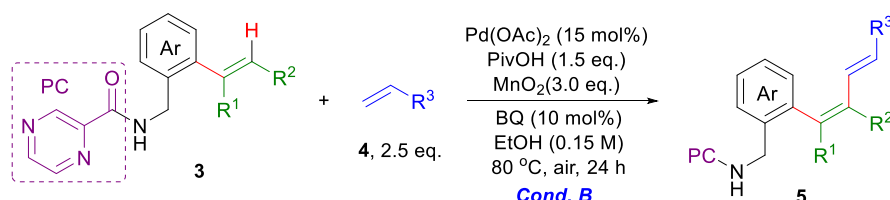

A screw-cap vial was charged with  $\text{Pd}(\text{OAc})_2$  (5.1 mg, 0.0225 mmol, 15 mol%),  $\text{MnO}_2$  (39.1 mg, 0.45 mmol, 3.0 equiv), BQ (1.6 mg, 0.015 mmol, 10 mol%), amide **3** (0.15 mmol, 1.0 equiv), EtOH (1.0 mL). Then, pivalic acid (23.0 mg, 0.18 mmol, 1.5

equiv), and olefin **2** (48.1 mg, 0.375 mmol, 2.5 equiv) were added into the solution in sequence. The vial was sealed under air and heated to 80 °C with stirring for 24 h. After cooling down, the mixture was concentrated and directly applied to a flash column chromatography (PE/EA mixtures) to obtain the diene product **5**.

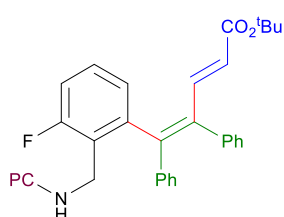

**Tert-butyl(2*E*,4*E*)-5-(3-fluoro-2-((pyrazine-2-carboxamido)methyl)phenyl)-4,5-diphenylpenta-2,4-dienoate (**5a**)**

Following the general procedure **2**, **5a** was obtained as a white solid (73.9 mg, 92% yield, *E/Z* > 99:1, m.p. = 81.3 °C).

**<sup>1</sup>H NMR** (500 MHz, CDCl<sub>3</sub>) δ 9.33 (d, *J* = 1.3 Hz, 1H), 8.67 (d, *J* = 2.4 Hz, 1H), 8.42 – 8.37 (m, 1H), 7.59 (s, 1H), 7.44 – 7.38 (m, 1H), 7.28 (d, *J* = 5.7 Hz, 2H), 7.26 – 7.23 (m, 2H), 7.20 – 7.14 (m, 4H), 7.00 – 6.91 (m, 5H), 5.47 (d, *J* = 15.5 Hz, 1H), 4.68 – 4.54 (m, 2H), 1.33 (s, 9H). **<sup>13</sup>C NMR** (125 MHz, CDCl<sub>3</sub>) δ 166.24, 162.18 (d, *J*<sub>CF</sub> = 248.6 Hz), 162.05, 146.98, 145.11 (d, *J*<sub>CF</sub> = 2.3 Hz), 144.36, 144.26, 143.83, 143.33 (d, *J*<sub>CF</sub> = 3.6 Hz), 142.29, 140.02, 139.22, 138.02, 130.84, 130.35, 129.55 (d, *J*<sub>CF</sub> = 9.3 Hz), 128.40, 127.72, 127.42, 127.34, 127.21 (d, *J*<sub>CF</sub> = 3.0 Hz), 124.49, 123.43 (d, *J*<sub>CF</sub> = 15.1 Hz), 115.60 (d, *J*<sub>CF</sub> = 22.3 Hz), 80.21, 35.00 (d, *J*<sub>CF</sub> = 4.1 Hz), 28.04. **<sup>19</sup>F NMR** (471 MHz, CDCl<sub>3</sub>) δ -115.70. **HRMS (ESI)** calcd for C<sub>33</sub>H<sub>30</sub>FN<sub>3</sub>O<sub>3</sub>Na [M+Na]<sup>+</sup>: 558.2163, found: 558.2164. **FTIR** (KBr, cm<sup>-1</sup>) 2957.01, 2825.23, 2713.08, 1605.61, 1364.49, 1067.29, 778.50.

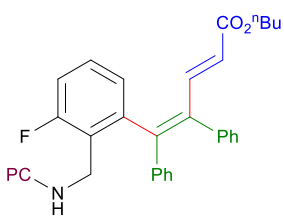

**Butyl (2*E*,4*E*)-5-(3-fluoro-2-((pyrazine-2-carboxamido)methyl)phenyl)-4,5-diphenylpenta-2,4-dienoate (**5b**)**

Following the general procedure **2**, **5b** was obtained as a yellow solid (70.6 mg, 88% yield, *E/Z* > 99:1, m.p. = 63.9 °C).

**<sup>1</sup>H NMR** (500 MHz, CDCl<sub>3</sub>) δ 9.33 (s, 1H), 8.70 – 8.63 (m, 1H), 8.39 (s, 1H), 7.61 (s, 1H), 7.43 – 7.38 (m, 1H), 7.35 (d, *J* = 15.5 Hz, 1H), 7.30 – 7.23 (m, 3H), 7.21 – 7.13 (m, 4H), 7.01 – 6.94 (m, 3H), 6.94 – 6.91 (m, 2H), 5.55 (d, *J* = 15.6 Hz, 1H), 4.62 (d, *J* = 5.6 Hz, 2H), 4.01 – 3.91 (m, 2H), 1.53 – 1.44 (m, 2H), 1.30 – 1.20 (m, 2H), 0.86 (t,

$J = 7.4$  Hz, 3H). **<sup>13</sup>C NMR** (125 MHz, CDCl<sub>3</sub>)  $\delta$  165.89, 161.15 (d,  $J_{CF} = 248.8$  Hz), 161.02, 145.96, 144.51 (d,  $J_{CF} = 2.2$  Hz), 143.78, 143.28, 143.23, 142.24 (d,  $J_{CF} = 3.6$  Hz), 141.22, 138.87, 138.13, 136.82, 129.79, 129.32, 128.54 (d,  $J_{CF} = 9.3$  Hz), 127.42, 126.72, 126.49, 126.45, 126.14 (d,  $J_{CF} = 3.0$  Hz), 122.47 (d,  $J_{CF} = 15.2$  Hz), 121.61, 114.60 (d,  $J_{CF} = 22.4$  Hz), 63.10, 33.98 (d,  $J_{CF} = 4.1$  Hz), 29.52, 18.06, 12.63. **<sup>19</sup>F NMR** (471 MHz, CDCl<sub>3</sub>)  $\delta$  -115.54. **HRMS (ESI)** calcd for C<sub>33</sub>H<sub>30</sub>FN<sub>3</sub>O<sub>3</sub>Na [M+Na]<sup>+</sup>: 558.2163, found: 558.2169. **FTIR** (KBr, cm<sup>-1</sup>) 2968.22, 2830.84, 2718.69, 1585.98, 1356.07, 1070.09, 784.11.

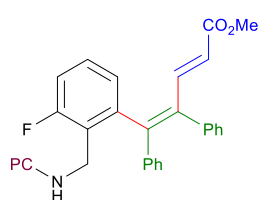

**Methyl (2E,4E)-5-(3-fluoro-2-((pyrazine-2-carboxamido)methyl)phenyl)-4,5-diphenylpenta-2,4-dienoate (5c)**

Following the general procedure 2, 5c was obtained as a white solid (66.6 mg, 90% yield,  $E/Z=97:3$ , m.p. = 57.1 °C). **<sup>1</sup>H**

**NMR** (500 MHz, CDCl<sub>3</sub>)  $\delta$  9.25 (d,  $J = 1.3$  Hz, 1H), 8.60 (d,  $J = 2.4$  Hz, 1H), 8.33 – 8.30 (m, 1H), 7.52 (s, 1H), 7.38 – 7.30 (m, 1H), 7.26 (d,  $J = 15.6$  Hz, 1H), 7.23 – 7.19 (m, 1H), 7.19 – 7.15 (m, 2H), 7.13 – 7.08 (m, 3H), 7.06 (d,  $J = 7.4$  Hz, 1H), 6.94 – 6.87 (m, 3H), 6.86 – 6.82 (m, 2H), 5.47 (d,  $J = 15.6$  Hz, 1H), 4.59 – 4.47 (m, 2H), 3.48 (s, 3H). **<sup>13</sup>C NMR** (125 MHz, CDCl<sub>3</sub>)  $\delta$  166.25, 161.16 (d,  $J_{CF} = 248.8$  Hz), 161.02, 145.97, 144.66 (d,  $J_{CF} = 2.3$  Hz), 143.93, 143.29, 143.26, 142.15 (d,  $J_{CF} = 3.5$  Hz), 141.20, 138.91, 138.13, 136.85, 129.81, 129.31, 128.59 (d,  $J_{CF} = 9.3$  Hz), 127.41, 126.73, 126.51, 126.46, 126.18 (d,  $J_{CF} = 3.1$  Hz), 122.48 (d,  $J_{CF} = 15.2$  Hz), 121.33, 114.71 (d,  $J_{CF} = 22.3$  Hz), 50.40, 33.97 (d,  $J_{CF} = 4.2$  Hz). **<sup>19</sup>F NMR** (471 MHz, CDCl<sub>3</sub>)  $\delta$  -115.47. **HRMS (ESI)** calcd for C<sub>30</sub>H<sub>24</sub>FN<sub>3</sub>O<sub>3</sub>Na [M+Na]<sup>+</sup>: 516.1694, found: 516.1704. **FTIR** (KBr, cm<sup>-1</sup>) 2954.34, 2836.58, 2718.83, 1600.15, 1373.04, 1073.05, 778.66.

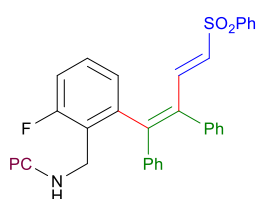

**N-(2-((1E,3E)-1,2-Diphenyl-4-(phenylsulfonyl)buta-1,3-dien-1-yl)-6-fluorobenzyl)pyrazine-2-carboxamide (5d)** Following the general procedure 1, 5d was obtained as a white solid



(64.7 mg, 75% yield, *E/Z*=99:1, m.p. = 62.3 °C). **<sup>1</sup>H NMR** (500 MHz, CDCl<sub>3</sub>) δ 9.34 (s, 1H), 8.71 (d, *J* = 2.4 Hz, 1H), 8.51 – 8.42 (m, 1H), 7.67 (d, *J* = 7.3 Hz, 3H), 7.57 (t, *J* = 7.5 Hz, 1H), 7.49 – 7.39 (m, 3H), 7.25 (dd, *J* = 12.1, 2.3 Hz, 3H), 7.20 (d, *J* = 8.8 Hz, 1H), 7.13 – 7.08 (m, 3H), 6.98 (d, *J* = 7.1 Hz, 3H), 6.93 – 6.87 (m, 2H), 6.05 (d, *J* = 15.0 Hz, 1H), 4.55 – 4.46 (m, 2H). **<sup>13</sup>C NMR** (125 MHz, CDCl<sub>3</sub>) δ 161.20 (d, *J*<sub>CF</sub> = 249.1 Hz), 161.11, 146.93 (d, *J*<sub>CF</sub> = 2.3 Hz), 146.22, 143.21, 143.14, 141.70, 141.53 (d, *J*<sub>CF</sub> = 3.6 Hz), 141.47, 139.46, 138.38, 136.11 (d, *J*<sub>CF</sub> = 6.5 Hz), 132.23, 130.46, 129.63, 129.35, 128.60 (d, *J*<sub>CF</sub> = 9.2 Hz), 128.16, 127.65, 126.88 (d, *J*<sub>CF</sub> = 3.7 Hz), 126.81, 126.44, 126.21 (d, *J*<sub>CF</sub> = 3.0 Hz), 122.66 (d, *J*<sub>CF</sub> = 15.2 Hz), 115.19 (d, *J*<sub>CF</sub> = 22.4 Hz), 33.79 (d, *J*<sub>CF</sub> = 4.0 Hz). **<sup>19</sup>F NMR** (471 MHz, CDCl<sub>3</sub>) δ -115.15. **HRMS (ESI)** calcd for C<sub>34</sub>H<sub>26</sub>FN<sub>3</sub>O<sub>3</sub>SNa [M+Na]<sup>+</sup>: 598.1571, found: 598.1561. **FTIR** (KBr, cm<sup>-1</sup>) 2954.21, 2833.64, 2721.50, 1597.20, 1370.09, 1072.90, 772.90.

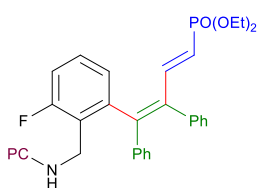

**Diethyl((1*E*,3*E*)-4-(3-fluoro-2-((pyrazine-2-carboxamido)methyl) phenyl)-3,4-diphenyl buta-1,3-dien-1-yl) phosphonate**

**(5e)** Following the general procedure 2, **5e** was obtained as a yellow liquid (43.7 mg, 51% yield, *E/Z* > 99:1). **<sup>1</sup>H NMR** (500

MHz, CDCl<sub>3</sub>) δ 9.32 (s, 1H), 8.69 (d, *J* = 2.4 Hz, 1H), 8.48 – 8.41 (m, 1H), 7.59 (s, 1H), 7.44 – 7.38 (m, 1H), 7.31 – 7.27 (m, 1H), 7.27 – 7.21 (m, 2H), 7.19 – 7.14 (m, 4H), 7.09 (dd, *J* = 21.8, 17.1 Hz, 1H), 7.01 – 6.88 (m, 5H), 5.47 (dd, *J* = 19.7, 17.1 Hz, 1H), 4.56 (d, *J* = 5.6 Hz, 2H), 3.96 – 3.85 (m, 4H), 1.17 (t, *J* = 7.1 Hz, 6H). **<sup>13</sup>C NMR** (125 MHz, CDCl<sub>3</sub>) δ 162.21 (d, *J*<sub>CF</sub> = 248.9 Hz), 162.07, 147.64 (d, *J*<sub>CP</sub> = 8.1 Hz), 147.08, 144.87, 144.27, 144.23, 143.11 (d, *J*<sub>CF</sub> = 3.5 Hz), 142.39, 139.90 (d, *J*<sub>CF</sub> = 2.0 Hz), 139.53 (d, *J*<sub>CP</sub> = 24.5 Hz), 137.58, 130.95, 130.32, 129.49 (d, *J*<sub>CF</sub> = 9.3 Hz), 128.47, 127.77, 127.52 (d, *J*<sub>CF</sub> = 17.2 Hz), 127.42, 127.40, 123.57 (d, *J*<sub>CF</sub> = 15.1 Hz), 119.05 (d, *J*<sub>CP</sub> = 190.2 Hz), 115.70 (d, *J*<sub>CF</sub> = 22.4 Hz), 61.70 (t, *J*<sub>CP</sub> = 6.2 Hz), 34.93 (d, *J*<sub>CF</sub> = 4.1 Hz), 16.24 (dd, *J*<sub>CP</sub> = 6.4, 3.0 Hz). **<sup>19</sup>F NMR** (471 MHz, CDCl<sub>3</sub>) δ -115.38. **<sup>31</sup>P NMR** (202 MHz, CDCl<sub>3</sub>) δ 19.29. **HRMS (ESI)** calcd for C<sub>32</sub>H<sub>31</sub>FN<sub>3</sub>O<sub>4</sub>PNa [M+Na]<sup>+</sup>: 594.1928, found: 594.1924. **FTIR** (KBr, cm<sup>-1</sup>) 2968.22,

2833.64, 2724.30, 1602.80, 1361.68, 1086.92, 775.70.

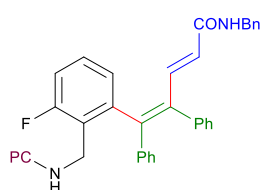

***N*-(2-(((1*E*,3*E*)-5-(Benzylamino)-5-oxo-1,2-diphenylpenta-1,3-dien-1-yl)-6-fluorobenzyl)pyrazine-2-carboxamide (5f)**

Following the general procedure 2 use methanol instead of ethanol, **5f** was obtained as a white solid (77.6 mg, 91% yield, *E/Z*=96:4, m.p. = 81.0 °C). **<sup>1</sup>H NMR** (500 MHz, CDCl<sub>3</sub>) δ 9.26 (d, *J* = 1.2 Hz, 1H), 8.57 (d, *J* = 2.4 Hz, 1H), 8.35 – 8.27 (m, 1H), 7.63 (s, 1H), 7.42 – 7.37 (m, 1H), 7.35 (d, *J* = 15.1 Hz, 1H), 7.30 – 7.26 (m, 2H), 7.26 – 7.20 (m, 4H), 7.20 – 7.11 (m, 6H), 6.99 – 6.88 (m, 5H), 5.67 (s, 1H), 5.46 (d, *J* = 15.1 Hz, 1H), 4.67 (dd, *J* = 14.3, 6.3 Hz, 1H), 4.55 (dd, *J* = 14.4, 4.6 Hz, 1H), 4.37 – 4.27 (m, 2H). **<sup>13</sup>C NMR** (125 MHz, CDCl<sub>3</sub>) δ 165.46, 162.25 (d, *J*<sub>CF</sub> = 248.5 Hz), 162.10, 146.88, 144.60 (d, *J*<sub>CF</sub> = 2.1 Hz), 144.38, 144.10, 143.28 (d, *J*<sub>CF</sub> = 3.6 Hz), 142.37, 141.74, 140.21, 139.10, 138.42, 138.09, 130.88, 130.31, 129.67 (d, *J*<sub>CF</sub> = 9.3 Hz), 128.68, 128.35, 127.95, 127.68, 127.28 (d, *J*<sub>CF</sub> = 14.5 Hz), 127.20, 127.17, 124.98, 123.37 (d, *J*<sub>CF</sub> = 15.0 Hz), 115.59 (d, *J*<sub>CF</sub> = 22.3 Hz), 43.68, 35.15 (d, *J*<sub>CF</sub> = 3.8 Hz). **<sup>19</sup>F NMR** (471 MHz, CDCl<sub>3</sub>) δ -115.65. **HRMS (ESI)** calcd for C<sub>36</sub>H<sub>29</sub>FN<sub>4</sub>O<sub>2</sub>Na [M+Na]<sup>+</sup>: 591.2167, found: 591.2165. **FTIR** (KBr, cm<sup>-1</sup>) 2954.21, 2830.84, 2715.89, 1600.00, 1361.68, 1075.70, 778.50.

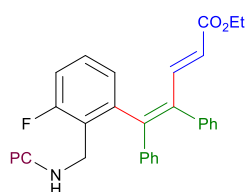

**Ethyl methyl (2*E*,4*E*)-5-(3-fluoro-2-((pyrazine-2-carboxamido)phenyl)-4,5-diphenylpenta-2,4-dienoate (5g)**

Following the general procedure 2, **5g** was obtained as a yellow liquid (54.0 mg, 71% yield, *E/Z*=98:2). **<sup>1</sup>H NMR** (500 MHz, CDCl<sub>3</sub>) δ 9.32 (s, 1H), 8.67 (d, *J* = 2.3 Hz, 1H), 8.42 – 8.37 (m, 1H), 7.61 (s, 1H), 7.44 – 7.38 (m, 1H), 7.35 (d, *J* = 15.5 Hz, 1H), 7.30 – 7.22 (m, 3H), 7.21 – 7.13 (m, 4H), 7.01 – 6.90 (m, 5H), 5.55 (d, *J* = 15.5 Hz, 1H), 4.68 – 4.55 (m, 2H), 4.07 – 3.95 (m, 2H), 1.14 (t, *J* = 7.1 Hz, 3H). **<sup>13</sup>C NMR** (125 MHz, CDCl<sub>3</sub>) δ 166.90, 162.19 (d, *J*<sub>CF</sub> = 248.7 Hz), 162.06, 146.97, 145.57 (d, *J*<sub>CF</sub> = 2.3 Hz), 144.81, 144.33,

144.24, 143.21 (d,  $J_{CF} = 3.5$  Hz), 142.27, 139.96, 139.18, 137.92, 130.83, 130.35, 129.59 (d,  $J_{CF} = 9.3$  Hz), 128.44, 127.75, 127.51, 127.46, 127.22 (d,  $J_{CF} = 3.0$  Hz), 123.48 (d,  $J_{CF} = 15.2$  Hz), 122.69, 115.69 (d,  $J_{CF} = 22.3$  Hz), 60.24, 53.45, 35.02 (d,  $J_{CF} = 4.1$  Hz), 14.13.  **$^{19}\text{F}$  NMR** (471 MHz,  $\text{CDCl}_3$ )  $\delta$  -115.54. **HRMS (ESI)** calcd for  $\text{C}_{31}\text{H}_{26}\text{FN}_3\text{O}_3\text{Na}$   $[\text{M}+\text{Na}]^+$ : 530.1850, found: 530.1856. **FTIR** (KBr,  $\text{cm}^{-1}$ ) 2965.42, 2830.84, 2724.30, 2351.40, 1608.41, 1372.90, 1061.68, 770.09, 568.22.

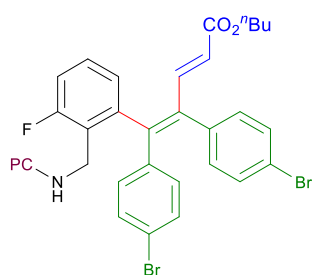

**Butyl(2*E*,4*E*)-4,5-bis(4-bromophenyl)-5-(3-fluoro-2-(((p-hosphaneylmethyl)amino)methyl)phenyl)penta-2,4-dien oate (5h)** Following the general procedure 2 at the conditions of 110 °C, **5h** was obtained as a white solid (71.5 mg, 69% yield, *E/Z*=96:4, m.p. = 58.3 °C).  **$^1\text{H}$  NMR**

(500 MHz,  $\text{CDCl}_3$ )  $\delta$  9.31 (s, 1H), 8.69 (d,  $J = 2.4$  Hz, 1H), 8.46 – 8.39 (m, 1H), 7.52 (s, 1H), 7.45 (d,  $J = 8.5$  Hz, 2H), 7.43 – 7.39 (m, 1H), 7.28 (d,  $J = 15.6$  Hz, 1H), 7.19 (t,  $J = 8.9$  Hz, 1H), 7.14 (d,  $J = 8.6$  Hz, 2H), 7.09 (t,  $J = 7.3$  Hz, 3H), 6.79 (d,  $J = 8.6$  Hz, 2H), 5.51 (d,  $J = 15.6$  Hz, 1H), 4.65 (dd,  $J = 14.3, 6.3$  Hz, 1H), 4.50 (dd,  $J = 14.4, 4.9$  Hz, 1H), 4.01 – 3.92 (m, 2H), 1.54 – 1.46 (m, 2H), 1.31 – 1.22 (m, 2H), 0.87 (t,  $J = 7.4$  Hz, 3H).  **$^{13}\text{C}$  NMR** (125 MHz,  $\text{CDCl}_3$ )  $\delta$  166.65, 162.32 (d,  $J_{CF} = 249.1$  Hz), 162.04, 147.16, 144.62 (d,  $J_{CF} = 2.2$  Hz), 144.16 (d,  $J_{CF} = 14.9$  Hz), 144.06, 142.53, 142.48, 138.72, 138.41, 136.52, 132.44, 131.94, 131.91, 131.21, 129.81 (d,  $J_{CF} = 9.3$  Hz), 127.09 (d,  $J_{CF} = 2.9$  Hz), 123.49 (d,  $J_{CF} = 15.3$  Hz), 123.15, 122.11 (d,  $J_{CF} = 22.6$  Hz), 116.02 (d,  $J_{CF} = 22.3$  Hz), 64.31, 34.95 (d,  $J_{CF} = 3.8$  Hz), 30.53, 19.09, 13.66.  **$^{19}\text{F}$  NMR** (471 MHz,  $\text{CDCl}_3$ )  $\delta$  -115.19. **HRMS (ESI)** calcd for  $\text{C}_{33}\text{H}_{28}\text{Br}_2\text{FN}_3\text{O}_3$   $[\text{M}+\text{Na}]^+$ : 714.0374, found: 714.0371. **FTIR** (KBr,  $\text{cm}^{-1}$ ) 2948.60, 2828.04, 2718.69, 2357.01, 1597.20, 1361.68, 1084.11, 784.11.

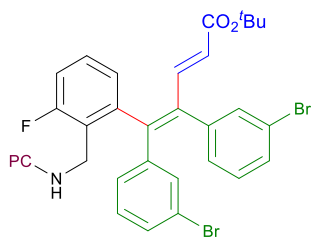

**Tert-butyl(2*E*,4*E*)-4,5-bis(3-bromophenyl)-5-(3-fluoro-2-((pyrazine-2-carboxamido)methyl)phenyl)penta-2,4-dienoate (5i)** Following the general procedure 2 at the conditions of 110 °C, **5i** was obtained as a white solid (78.8 mg, 76% yield, *E/Z*=93:7, m.p. = 56.5 °C). **<sup>1</sup>H NMR** (500 MHz, CDCl<sub>3</sub>) δ 9.34 (s, 1H), 8.69 (d, *J* = 2.3 Hz, 1H), 8.46 – 8.43 (m, 1H), 7.64 (s, 1H), 7.45 – 7.40 (m, 2H), 7.36 (s, 1H), 7.22 – 7.13 (m, 4H), 7.10 (d, *J* = 7.0 Hz, 1H), 7.09 – 7.06 (m, 1H), 7.03 (t, *J* = 1.7 Hz, 1H), 6.91 – 6.87 (m, 1H), 6.84 (t, *J* = 7.8 Hz, 1H), 5.45 (d, *J* = 15.6 Hz, 1H), 4.67 – 4.51 (m, 2H), 1.34 (s, 9H). **<sup>13</sup>C NMR** (125 MHz, CDCl<sub>3</sub>) δ 165.81, 162.22 (d, *J*<sub>CF</sub> = 249.0 Hz), 162.04, 147.14, 144.26, 144.14, 144.03 (d, *J*<sub>CF</sub> = 2.2 Hz), 142.81, 142.38, 142.05 (d, *J*<sub>CF</sub> = 3.5 Hz), 141.67, 139.73, 138.74, 133.38, 132.95, 130.90, 130.64, 130.16, 129.86 (d, *J*<sub>CF</sub> = 9.3 Hz), 129.53, 129.30, 128.97, 127.09 (d, *J*<sub>CF</sub> = 3.2 Hz), 125.42, 123.48 (d, *J*<sub>CF</sub> = 15.3 Hz), 122.44, 122.06, 116.09 (d, *J*<sub>CF</sub> = 22.4 Hz), 80.58, 34.82 (d, *J*<sub>CF</sub> = 4.3 Hz), 28.01. **<sup>19</sup>F NMR** (471 MHz, CDCl<sub>3</sub>) δ -115.36. **HRMS (ESI)** calcd for C<sub>33</sub>H<sub>28</sub>Br<sub>2</sub>FN<sub>3</sub>O<sub>3</sub>Na [M+Na]<sup>+</sup>: 714.0374, found: 714.0373. **FTIR** (KBr, cm<sup>-1</sup>) 2965.42, 2833.64, 2715.89, 1602.80, 1356.07, 1072.90, 781.31.

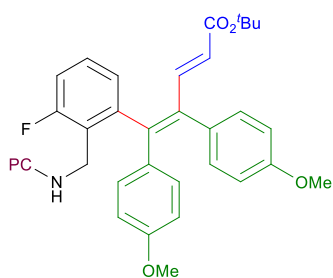

**Tert-butyl(2*E*,4*E*)-5-(3-fluoro-2-((pyrazine-2-carboxamido)methyl)phenyl)-4,5-bis(4-methoxyphenyl)penta-2,4-dienoate (5j)** Following the general procedure 2 at the conditions of 110°C, **5j** was obtained as a white solid (59.8 mg, 67% yield, *E/Z*=98:2, m.p. = 116.6 °C). **<sup>1</sup>H NMR** (500 MHz, CDCl<sub>3</sub>) δ 9.31 (s, 1H), 8.66 (d, *J* = 2.3 Hz, 1H), 8.40 – 8.37 (m, 1H), 7.45 (s, 1H), 7.42 – 7.37 (m, 1H), 7.25 (d, *J* = 15.4 Hz, 1H), 7.14 – 7.08 (m, 4H), 6.84 (d, *J* = 8.8 Hz, 2H), 6.81 (d, *J* = 8.9 Hz, 2H), 6.51 (d, *J* = 8.9 Hz, 2H), 5.48 (d, *J* = 15.4 Hz, 1H), 4.62 (dd, *J* = 14.3, 6.2 Hz, 1H), 4.51 (dd, *J* = 13.7, 4.6 Hz, 1H), 3.81 (s, 3H), 3.59 (s, 3H), 1.34 (s, 9H). **<sup>13</sup>C NMR** (125 MHz, CDCl<sub>3</sub>) δ 166.45, 162.15 (d, *J*<sub>CF</sub> = 248.8 Hz), 161.99, 158.71 (d, *J*<sub>CF</sub> = 12.3 Hz), 146.90, 144.53,

144.37, 144.21, 143.91 (d,  $J_{CF} = 3.5$  Hz), 142.31, 137.50, 132.65, 131.97, 131.87, 130.97, 130.61, 130.50, 129.50 (d,  $J_{CF} = 9.2$  Hz), 127.24 (d,  $J_{CF} = 3.0$  Hz), 123.53, 123.31 (d,  $J_{CF} = 15.1$  Hz), 115.48 (d,  $J_{CF} = 22.4$  Hz), 113.98, 113.22, 80.06, 55.19, 54.95, 34.98 (d,  $J = 4.1$  Hz), 28.05. **<sup>19</sup>F NMR** (471 MHz, CDCl<sub>3</sub>)  $\delta$  -115.71. **HRMS (ESI)** calcd for C<sub>35</sub>H<sub>34</sub>FN<sub>3</sub>O<sub>5</sub>Na [M+Na]<sup>+</sup>: 618.2375, found: 618.2382. **FTIR** (KBr, cm<sup>-1</sup>) 2957.14, 2828.17, 2718.83, 1600.15, 1359.03, 1078.65, 778.66, 568.38.

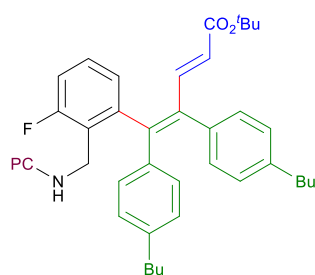

**Tert-butyl(2E,4E)-4,5-bis(4-butylphenyl)-5-(3-fluoro-2-(pyrazine-2-carboxamido)methyl)phenyl)penta-2,4-dienoate (5k)** Following the general procedure 2 at the conditions of 110°C, **5k** was obtained as a yellow liquid (54.4 mg, 56% yield,  $E/Z=98:2$ ). **<sup>1</sup>H NMR** (500 MHz, CDCl<sub>3</sub>)  $\delta$  9.33 (s, 1H), 8.66 (d,  $J = 2.1$  Hz, 1H), 8.39 (s, 1H), 7.58 (s, 1H), 7.43 – 7.37 (m, 1H), 7.26 (d,  $J = 15.4$  Hz, 1H), 7.15 (t,  $J = 7.5$  Hz, 2H), 7.10 – 7.03 (m, 4H), 6.77 (s, 4H), 5.50 (d,  $J = 15.5$  Hz, 1H), 4.57 (d,  $J = 5.4$  Hz, 2H), 2.59 (t,  $J = 7.6$  Hz, 2H), 2.37 – 2.31 (m, 2H), 1.59 (p,  $J = 7.6$  Hz, 2H), 1.41 – 1.34 (m, 3H), 1.33 (s, 9H), 1.24 – 1.16 (m, 3H), 0.92 (t,  $J = 7.4$  Hz, 3H), 0.83 (t,  $J = 7.3$  Hz, 3H). **<sup>13</sup>C NMR** (125 MHz, CDCl<sub>3</sub>)  $\delta$  166.41, 162.12 (d,  $J_{CF} = 248.5$  Hz), 162.02, 146.91, 145.00 (d,  $J_{CF} = 2.3$  Hz), 144.42, 144.31, 144.22, 143.71 (d,  $J_{CF} = 3.4$  Hz), 142.30, 142.23, 141.99, 138.64, 137.34, 135.33, 130.63, 130.29, 129.45 (d,  $J_{CF} = 9.3$  Hz), 128.45, 127.61, 127.24 (d,  $J_{CF} = 3.0$  Hz), 123.91, 123.39 (d,  $J_{CF} = 15.0$  Hz), 115.43 (d,  $J_{CF} = 22.3$  Hz), 80.06, 35.33, 35.14, 35.03 (d,  $J_{CF} = 4.0$  Hz), 33.43, 33.06, 28.04, 22.24, 22.17, 13.98, 13.88.

**<sup>19</sup>F NMR** (471 MHz, CDCl<sub>3</sub>)  $\delta$  -115.86. **HRMS (ESI)** calcd for C<sub>41</sub>H<sub>46</sub>FN<sub>3</sub>O<sub>3</sub>Na [M+Na]<sup>+</sup>: 670.3415, found: 670.3419. **FTIR** (KBr, cm<sup>-1</sup>) 2954.21, 2825.23, 2729.91, 1594.39, 1364.49, 1078.50, 778.50.

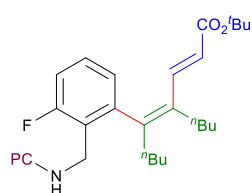

**Tert-butyl(2E,4Z)-4-butyl-5-(3-fluoro-2-(pyrazine-2-carboxamido)methyl)phenyl)nona-2,4-dienoate (5l)** Following the general procedure 2 at the conditions of 110°C, **5l** was obtained

as a yellow liquid (41.6 mg, 56% yield, *E/Z*=96:4). **<sup>1</sup>H NMR** (500 MHz, CDCl<sub>3</sub>) δ 9.36 (s, 1H), 8.69 (d, *J* = 2.1 Hz, 1H), 8.44 (s, 1H), 7.86 (s, 1H), 7.33 – 7.28 (m, 1H), 7.07 (t, *J* = 9.0 Hz, 1H), 6.88 – 6.82 (m, 2H), 5.69 (d, *J* = 15.8 Hz, 1H), 4.72 (dd, *J* = 14.2, 6.0 Hz, 1H), 4.43 (dd, *J* = 14.2, 4.9 Hz, 1H), 2.64 – 2.56 (m, 1H), 2.43 – 2.30 (m, 3H), 1.56 – 1.39 (m, 5H), 1.38 – 1.19 (m, 12H), 0.96 (t, *J* = 6.8 Hz, 3H), 0.83 (t, *J* = 6.9 Hz, 3H). **<sup>13</sup>C NMR** (125 MHz, CDCl<sub>3</sub>) δ 166.51, 162.16, 162.04 (d, *J*<sub>CF</sub> = 248.0 Hz), 147.01, 146.21 (d, *J*<sub>CF</sub> = 1.8 Hz), 144.43, 144.29, 143.90 (d, *J*<sub>CF</sub> = 3.4 Hz), 142.52 (d, *J*<sub>CF</sub> = 10.7 Hz), 135.39, 129.22 (d, *J*<sub>CF</sub> = 9.3 Hz), 125.37 (d, *J*<sub>CF</sub> = 3.0 Hz), 122.34 (d, *J*<sub>CF</sub> = 14.6 Hz), 119.09, 114.54 (d, *J*<sub>CF</sub> = 22.1 Hz), 79.88, 35.21 (d, *J*<sub>CF</sub> = 3.4 Hz), 35.09, 31.37, 30.15, 28.04, 27.67, 23.16, 23.01, 13.95, 13.83. **<sup>19</sup>F NMR** (471 MHz, CDCl<sub>3</sub>) δ -115.96. **HRMS (ESI)** calcd for C<sub>29</sub>H<sub>38</sub>FN<sub>3</sub>O<sub>3</sub>Na [M+Na]<sup>+</sup>: 518.2789, found: 518.2795. **FTIR** (KBr, cm<sup>-1</sup>) 2965.42, 2830.84, 2715.89, 2365.42, 1311.21, 1367.29, 1086.92, 786.92, 565.42.

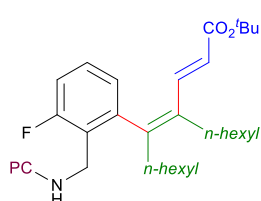

**Tert-butyl (2*E*,4*Z*)-5-(3-fluoro-2-((pyrazine-2-carboxamido)methyl)phenyl)-4-hexylundeca-2,4-dienoate (5m)** Following the general procedure 2 at the conditions of 110°C, **5m** was obtained as a yellow liquid (49.2 mg, 54% yield, *E/Z*=97:3).

**<sup>1</sup>H NMR** (500 MHz, CDCl<sub>3</sub>) δ 9.36 (s, 1H), 8.69 (s, 1H), 8.44 (s, 1H), 7.84 (s, 1H), 7.33 – 7.25 (m, 1H), 7.06 (t, *J* = 9.0 Hz, 1H), 6.91 – 6.82 (m, 2H), 5.69 (d, *J* = 15.8 Hz, 1H), 4.72 (dd, *J* = 14.2, 6.1 Hz, 1H), 4.42 (dd, *J* = 14.5, 4.7 Hz, 1H), 2.62 – 2.53 (m, 1H), 2.38 (t, *J* = 7.9 Hz, 2H), 2.35 – 2.28 (m, 1H), 1.53 – 1.36 (m, 5H), 1.33 (s, 9H), 1.30 – 1.10 (m, 11H), 0.91 (t, *J* = 6.8 Hz, 3H), 0.82 (t, *J* = 7.0 Hz, 3H). **<sup>13</sup>C NMR** (125 MHz, CDCl<sub>3</sub>) δ 166.50, 162.14, 162.03 (d, *J*<sub>CF</sub> = 248.0 Hz), 147.01, 146.23 (d, *J*<sub>CF</sub> = 1.8 Hz), 144.44, 144.31, 143.91 (d, *J*<sub>CF</sub> = 3.4 Hz), 142.56, 142.46, 135.43, 129.21 (d, *J*<sub>CF</sub> = 9.4 Hz), 125.35 (d, *J*<sub>CF</sub> = 2.9 Hz), 122.35 (d, *J*<sub>CF</sub> = 14.7 Hz), 119.11, 114.53 (d, *J*<sub>CF</sub> = 22.1 Hz), 79.87, 35.36, 35.19 (d, *J*<sub>CF</sub> = 3.4 Hz), 31.62, 31.57, 29.76, 29.58, 29.21, 28.04, 27.97, 27.11, 22.65, 22.52, 14.08, 14.00. **<sup>19</sup>F NMR** (471 MHz, CDCl<sub>3</sub>) δ -115.96. **HRMS (ESI)** calcd for C<sub>33</sub>H<sub>46</sub>FN<sub>3</sub>O<sub>3</sub>Na [M+Na]<sup>+</sup>: 574.3415,

found: 574.3418. **FTIR** (KBr,  $\text{cm}^{-1}$ ) 2959.81, 2836.45, 2721.50, 2351.40, 1614.02, 1358.88, 1084.11, 770.09.

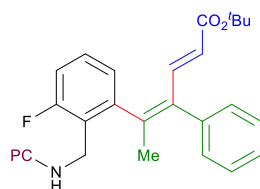

**Tert-butyl (2E,4E)-5-(3-fluoro-2-((pyrazine-2-carboxamido)methyl)phenyl)-4-phenylhexa-2,4-dienoate (5n)** Following the general procedure 2 at the conditions of 110°C, **5n** was obtained as a white solid (59.6 mg, 84% yield,  $E/Z > 99:1$ , m.p. = 59.0 °C). **<sup>1</sup>H NMR** (500 MHz,  $\text{CDCl}_3$ )  $\delta$  9.38 (s, 1H), 8.68 (s, 1H), 8.45 (s, 1H), 8.06 (s, 1H), 7.45 (t,  $J = 7.5$  Hz, 2H), 7.39 – 7.34 (m, 2H), 7.30 (d,  $J = 6.9$  Hz, 2H), 7.14 – 7.08 (m, 2H), 7.02 (d,  $J = 7.6$  Hz, 1H), 5.16 (d,  $J = 15.4$  Hz, 1H), 4.85 (dd,  $J = 14.4, 6.1$  Hz, 1H), 4.63 (dd,  $J = 14.2, 5.6$  Hz, 1H), 1.93 (s, 3H), 1.29 (s, 9H). **<sup>13</sup>C NMR** (125 MHz,  $\text{CDCl}_3$ )  $\delta$  166.35, 162.27, 162.07 (d,  $J_{CF} = 247.7$  Hz), 147.11, 144.38, 144.33, 144.29, 142.84 (d,  $J_{CF} = 2.1$  Hz), 142.72, 142.52, 138.32, 137.81, 129.84 (d,  $J_{CF} = 9.4$  Hz), 129.58, 128.66, 127.39, 124.49 (d,  $J_{CF} = 3.1$  Hz), 122.80, 122.28 (d,  $J_{CF} = 14.8$  Hz), 114.81 (d,  $J_{CF} = 22.1$  Hz), 79.98, 34.95 (d,  $J_{CF} = 3.5$  Hz), 28.01, 24.08. **<sup>19</sup>F NMR** (471 MHz,  $\text{CDCl}_3$ )  $\delta$  -116.16. **HRMS (ESI)** calcd for  $\text{C}_{28}\text{H}_{28}\text{FN}_3\text{O}_3\text{Na}$   $[\text{M}+\text{Na}]^+$ : 496.2007, found: 496.2006. **FTIR** (KBr,  $\text{cm}^{-1}$ ) 2945.79, 2833.64, 2713.08, 1594.39, 1361.68, 1067.29, 778.50.

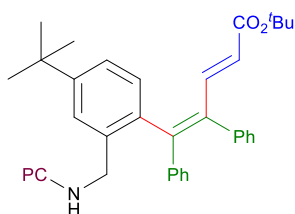

**Tert-butyl (2E,4E)-5-(4-(tert-butyl)-2-(((phosphaneyl)methyl)amino)methyl)phenyl)-4,5-diphenylpenta-2,4-dienoate (5o)** Following the general procedure 2 at the conditions of 140°C, **5o** was obtained as a yellow solid (65.4 mg, 76% yield,  $E/Z = 96:4$ , m.p. = 131.5 °C). **<sup>1</sup>H NMR** (500 MHz,  $\text{CDCl}_3$ )  $\delta$  9.36 (s, 1H), 8.68 (d,  $J = 2.4$  Hz, 1H), 8.43 – 8.38 (m, 1H), 7.63 (s, 1H), 7.46 (d,  $J = 1.9$  Hz, 1H), 7.42 (dd,  $J = 8.0, 2.0$  Hz, 1H), 7.37 (d,  $J = 15.6$  Hz, 1H), 7.28 – 7.22 (m, 4H), 7.13 (d,  $J = 6.4$  Hz, 2H), 7.00 – 6.95 (m, 3H), 6.91 (dd,  $J = 7.5, 2.1$  Hz, 2H), 5.47 (d,  $J = 15.6$  Hz, 1H), 4.51 – 4.42 (m, 2H), 1.36 (s, 9H), 1.34 (s, 9H). **<sup>13</sup>C NMR** (125 MHz,  $\text{CDCl}_3$ )  $\delta$  166.46, 162.30, 151.83, 147.10, 146.98, 144.52,

144.49, 144.28, 142.32, 140.54, 138.62, 138.45, 137.65, 135.39, 131.37, 130.90, 130.41, 128.30, 127.60, 127.21, 127.18, 127.17, 124.94, 123.88, 80.01, 42.06, 34.71, 31.34, 28.06. **HRMS (ESI)** calcd for C<sub>37</sub>H<sub>39</sub>N<sub>3</sub>O<sub>3</sub>Na [M+Na]<sup>+</sup>: 596.2884, found: 296.2875. **FTIR** (KBr, cm<sup>-1</sup>) 2645.79, 2836.45, 2718.69, 2368.22, 1597.20, 1386.92, 1199.07, 1075.70, 767.29, 599.07.

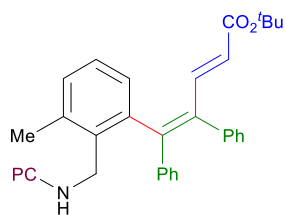

**Tert-butyl(2E,4E)-5-(3-methyl-2-((pyrazine-2-carboxamido)methyl)phenyl)-4,5-diphenylpenta-2,4-dienoate (5p)**

Following the general procedure 2 at the conditions of 110°C, **5p** was obtained as a Orange solid (36.7 mg, 46% yield, *E/Z*=93:7, m.p. = 130.6 °C). **<sup>1</sup>H NMR** (500 MHz, CDCl<sub>3</sub>) δ 9.29 (d, *J* = 1.4 Hz, 1H), 8.63 (d, *J* = 2.4 Hz, 1H), 8.31 (dd, *J* = 2.4, 1.5 Hz, 1H), 7.39 – 7.34 (m, 2H), 7.28 – 7.22 (m, 5H), 7.14 (d, *J* = 6.5 Hz, 2H), 7.08 (s, 1H), 6.97 – 6.92 (m, 2H), 6.92 – 6.85 (m, 3H), 5.48 (d, *J* = 15.5 Hz, 1H), 4.62 (dd, *J* = 14.2, 6.4 Hz, 1H), 4.48 (dd, *J* = 14.2, 4.3 Hz, 1H), 2.40 (s, 3H), 1.35 (s, 9H). **<sup>13</sup>C NMR** (125 MHz, CDCl<sub>3</sub>) δ 166.45, 162.12, 147.52, 146.89, 144.45, 144.26, 144.10, 142.15, 141.98, 140.68, 138.92, 138.49, 138.31, 133.47, 130.94, 130.86, 130.35, 129.42, 128.36, 128.11, 127.69, 127.29, 127.12, 123.81, 80.10, 39.00, 28.07, 19.55. **HRMS (ESI)** calcd for C<sub>34</sub>H<sub>33</sub>N<sub>3</sub>O<sub>3</sub>Na [M+Na]<sup>+</sup>: 554.2414, found: 554.2407. **FTIR** (KBr, cm<sup>-1</sup>) 2951.40, 2836.45, 2718.69, 2368.22, 1597.2, 1358.88, 1199.07, 1070.09, 778.50, 756.64.

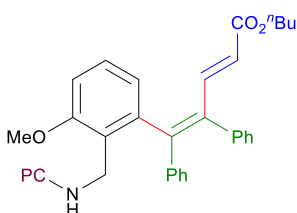

**Butyl (2E,4E)-5-(3-methoxy-2-(((phosphaneyl)methyl)amino)methyl)phenyl)-4,5-diphenylpenta-2,4-dienoate (5q)**

Following the general procedure 2 at the conditions of 110°C, **5q** was obtained as a yellow solid (64.8 mg, 79% yield, *E/Z*>99:1, m.p. = 103.0 °C). **<sup>1</sup>H NMR** (500 MHz, CDCl<sub>3</sub>) δ 9.31 (s, 1H), 8.65 (s, 1H), 8.39 (s, 1H), 7.73 (s, 1H), 7.40 – 7.34 (m, 2H), 7.30 – 7.20 (m, 5H), 7.00 – 6.88 (m, 7H), 5.51 (d, *J* = 15.6 Hz, 1H), 4.70 – 4.58 (m, 2H), 3.98 – 3.85 (m, 5H), 1.51 – 1.42 (m, 2H), 1.29 – 1.20 (m, 2H), 0.85 (t, *J* = 7.4 Hz, 3H). **<sup>13</sup>C NMR**



(125 MHz, CDCl<sub>3</sub>)  $\delta$  166.13, 160.88, 157.69, 145.84, 145.67, 144.33, 143.77, 143.23, 141.41, 141.22, 139.38, 137.60, 137.16, 129.90, 129.32, 128.01, 127.32, 126.50, 126.25, 126.09, 123.15, 122.29, 120.82, 109.34, 62.93, 54.68, 35.20, 29.53, 18.05, 12.65. **HRMS (ESI)** calcd for C<sub>34</sub>H<sub>33</sub>N<sub>3</sub>O<sub>3</sub>Na [M+Na]<sup>+</sup>: 570.2363, found: 570.2362. **FTIR** (KBr, cm<sup>-1</sup>) 2959.81, 2836.45, 2365.42, 1316.82, 1358.88, 1207.48, 1081.31, 778.50.

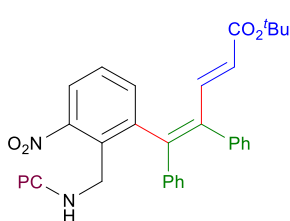

**Tert-butyl (2E,4E)-5-(3-nitro-2-((pyrazine-2-carboxamido)methyl)phenyl)-4,5-diphenylpenta-2,4-dienoate (5r)**

Following the general procedure 2 at the conditions of 110°C, **5r** was obtained as a yellow solid (64.1 mg, 76% yield, *E/Z*>99:1, m.p. = 147.0 °C). **<sup>1</sup>H NMR** (500 MHz, CDCl<sub>3</sub>)  $\delta$  9.37 (s, 1H), 8.68 (d, *J* = 2.4 Hz, 1H), 8.49 – 8.43 (m, 1H), 8.25 (dd, *J* = 7.3, 3.7 Hz, 1H), 7.99 (dd, *J* = 7.9, 1.5 Hz, 1H), 7.68 – 7.57 (m, 2H), 7.34 – 7.22 (m, 5H), 7.10 (d, *J* = 15.4 Hz, 1H), 7.03 – 6.96 (m, 5H), 5.40 (d, *J* = 15.4 Hz, 1H), 4.99 (dd, *J* = 14.1, 7.8 Hz, 1H), 4.48 (dd, *J* = 14.1, 4.0 Hz, 1H), 1.27 (s, 9H). **<sup>13</sup>C NMR** (125 MHz, CDCl<sub>3</sub>)  $\delta$  165.86, 162.05, 151.51, 147.02, 144.39, 144.34, 144.20, 143.92, 143.24, 142.57, 140.33, 139.23, 137.65, 136.16, 130.87, 130.50, 130.43, 129.01, 128.40, 127.76, 127.56, 127.53, 124.92, 124.54, 80.24, 37.51, 27.96. **HRMS (ESI)** calcd for C<sub>33</sub>H<sub>30</sub>N<sub>4</sub>O<sub>5</sub>Na [M+Na]<sup>+</sup>: 585.2108, found: 585.2110. **FTIR** (KBr, cm<sup>-1</sup>) 2957.01, 2825.23, 2715.89, 2359.81, 1602.80, 1364.49, 1210.28, 1072.90, 778.50, 576.64.

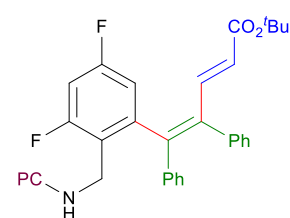

**Tert-butyl(2E,4E)-5-(3,5-difluoro-2-((pyrazine-2-carboxamido)methyl)phenyl)-4,5-diphenylpenta-2,4-dienoate (5s)**

Following the general procedure 2, **5s** was obtained as a yellow solid (59.7 mg, 72% yield, *E/Z*=96:4, m.p. = 60.1 °C). **<sup>1</sup>H NMR** (500 MHz, CDCl<sub>3</sub>)  $\delta$  9.33 (s, 1H), 8.68 (d, *J* = 2.4 Hz, 1H), 8.43 – 8.37 (m, 1H), 7.59 (s, 1H), 7.31 – 7.26 (m, 3H), 7.23 (d, *J* = 15.5 Hz, 1H), 7.20 – 7.16 (m, 2H), 7.03 – 6.96 (m, 3H), 6.95 – 6.90 (m, 4H), 5.49 (d, *J* = 15.5 Hz, 1H), 4.65 – 4.51 (m,

2H), 1.34 (s, 9H). **<sup>13</sup>C NMR** (125 MHz, CDCl<sub>3</sub>) δ 166.05, 162.35 (dd,  $J_{CF}$  = 251.2, 12.8 Hz), 162.16 (dd,  $J_{CF}$  = 251.4, 13.6 Hz), 162.08, 147.06, 144.50 (dd,  $J_{CF}$  = 9.1, 4.9 Hz), 144.26, 144.25, 143.83, 143.24, 142.31, 139.56, 139.36, 137.66, 130.75, 130.24, 128.46, 127.85, 127.59, 127.58, 125.17, 119.74 (dd,  $J_{CF}$  = 15.4, 3.9 Hz), 114.26 (dd,  $J_{CF}$  = 21.1, 3.4 Hz), 104.05 (t,  $J_{CF}$  = 25.2 Hz), 80.39, 34.51 (d,  $J_{CF}$  = 3.6 Hz), 28.02.

**<sup>19</sup>F NMR** (471 MHz, CDCl<sub>3</sub>) δ -109.40 (d,  $J_{FF}$  = 8.5 Hz), -111.03 (d,  $J_{FF}$  = 8.6 Hz).

**HRMS (ESI)** calcd for C<sub>33</sub>H<sub>29</sub>F<sub>2</sub>N<sub>3</sub>O<sub>3</sub> [M+Na]<sup>+</sup>: 576.2069, found: 576.2065. **FTIR** (KBr, cm<sup>-1</sup>) 2962.75, 2833.78, 2721.63, 2357.15, 1616.97, 1375.85, 1196.41, 1064.64, 781.46, 562.77.

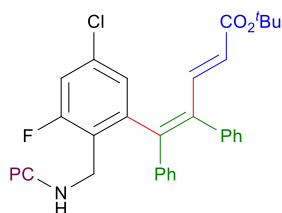

**Tert-butyl(2E,4E)-5-(5-chloro-3-fluoro-2-((pyrazine-2-carboxamido)phenyl)-4,5-diphenylpenta-2,4-dienoate (5t)** Following the general procedure 2 at the conditions of 110°C, 5t was

obtained as a yellow solid (64.9 mg, 76% yield,  $E/Z=96:4$ , m.p. = 105.5 °C). **<sup>1</sup>H NMR** (500 MHz, CDCl<sub>3</sub>) δ 9.33 (s, 1H), 8.68 (d,  $J$  = 2.4 Hz, 1H), 8.41 (dd,  $J$  = 2.3, 1.5 Hz, 1H), 7.63 (s, 1H), 7.31 – 7.25 (m, 3H), 7.24 – 7.15 (m, 5H), 7.02 – 6.96 (m, 3H), 6.94 – 6.90 (m, 2H), 5.50 (d,  $J$  = 15.5 Hz, 1H), 4.65 – 4.54 (m, 2H), 1.34 (s, 9H). **<sup>13</sup>C NMR** (125 MHz, CDCl<sub>3</sub>) δ 166.04, 162.10, 161.97 (d,  $J_{CF}$  = 252.1 Hz), 147.09, 144.34 (d,  $J_{CF}$  = 4.4 Hz), 144.27, 144.21, 143.56 (d,  $J_{CF}$  = 2.3 Hz), 143.21, 142.34, 139.73, 139.37, 137.66, 134.70 (d,  $J_{CF}$  = 11.8 Hz), 130.75, 130.29, 128.46, 127.86, 127.60, 127.07 (d,  $J_{CF}$  = 3.2 Hz), 125.26, 122.40 (d,  $J_{CF}$  = 15.2 Hz), 116.33 (d,  $J_{CF}$  = 25.9 Hz), 80.40, 34.58 (d,  $J_{CF}$  = 3.5 Hz), 28.02. **<sup>19</sup>F NMR** (471 MHz, CDCl<sub>3</sub>) δ -112.84. **HRMS (ESI)** calcd for C<sub>33</sub>H<sub>29</sub>ClF<sub>2</sub>N<sub>3</sub>O<sub>3</sub>Na [M+Na]<sup>+</sup>: 592.1774, found: 592.1768. **FTIR** (KBr, cm<sup>-1</sup>) 2959.81, 2836.45, 2365.42, 1616.82, 1358.88, 1207.48, 1081.31, 778.50.

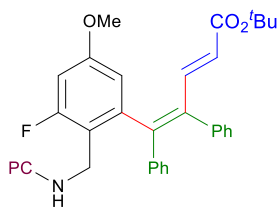

**Tert-butyl(2*E*,4*E*)-5-(3-fluoro-5-methoxy-2-((pyrazine-2-carboxamido) methyl)**

**phenyl)-4,5-diphenylpenta-2,4-dienoate (5u)** Following the

**general procedure 2** at the conditions of 110°C, **5u** was

obtained as a yellow solid (55.4 mg, 68% yield, *E/Z* = 94:6, m.p. = 50.9 °C). **<sup>1</sup>H NMR** (500 MHz, CDCl<sub>3</sub>) δ 9.33 (s, 1H), 8.66 (d, *J* = 2.0 Hz, 1H), 8.41 – 8.35 (m, 1H), 7.52 (s, 1H), 7.32 (d, *J* = 15.5 Hz, 1H), 7.30 – 7.23 (m, 3H), 7.18 (d, *J* = 6.7 Hz, 2H), 6.95 (q, *J* = 5.3 Hz, 5H), 6.74 – 6.68 (m, 2H), 5.47 (d, *J* = 15.5 Hz, 1H), 4.63 – 4.45 (m, 2H), 3.83 (s, 3H), 1.34 (s, 9H). **<sup>13</sup>C NMR** (125 MHz, CDCl<sub>3</sub>) δ 166.25, 162.83 (d, *J*<sub>CF</sub> = 247.8 Hz), 161.97, 160.21 (d, *J*<sub>CF</sub> = 12.2 Hz), 146.92, 145.13 (d, *J*<sub>CF</sub> = 2.7 Hz), 144.39, 144.19, 143.86, 143.73 (d, *J*<sub>CF</sub> = 5.4 Hz), 142.31, 139.70, 139.04, 137.95, 130.82, 130.27, 128.40, 127.71, 127.39 (d, *J*<sub>CF</sub> = 7.0 Hz), 124.43, 115.33 (d, *J*<sub>CF</sub> = 15.8 Hz), 113.17 (d, *J*<sub>CF</sub> = 2.5 Hz), 101.39 (d, *J*<sub>CF</sub> = 26.2 Hz), 80.20, 55.75, 34.61 (d, *J*<sub>CF</sub> = 3.6 Hz), 28.05. **<sup>19</sup>F NMR** (471 MHz, CDCl<sub>3</sub>) δ -113.54. **HRMS (ESI)** calcd for C<sub>34</sub>H<sub>32</sub>FN<sub>3</sub>O<sub>4</sub>Na [M+ H]<sup>+</sup>: 566.2455, found: 566.2452.

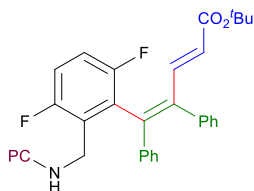

**Tert-butyl(2*E*,4*E*)-5-(3,6-difluoro-2-((pyrazine-2-carboxamido) methyl) phenyl)-4,5-diphenylpenta-2,4-dienoate (5v)**

Following the **general procedure 2** at the conditions of 110°C,

**5v** was obtained as a yellow solid (52.3 mg, 63% yield,

*E/Z*=93:7, m.p. = 145.6 °C). **<sup>1</sup>H NMR** (500 MHz, CDCl<sub>3</sub>) δ 9.35 (s, 1H), 8.67 (d, *J* = 2.3 Hz, 1H), 8.40 (s, 1H), 7.68 (s, 1H), 7.33 – 7.26 (m, 3H), 7.23 – 7.20 (m, 2H), 7.20 – 7.12 (m, 3H), 7.02 – 6.94 (m, 5H), 5.48 (d, *J* = 15.4 Hz, 1H), 4.70 (dd, *J* = 14.2, 7.9 Hz, 1H), 4.57 (dd, *J* = 14.2, 4.5 Hz, 1H), 1.31 (s, 9H). **<sup>13</sup>C NMR** (125 MHz, CDCl<sub>3</sub>) δ 166.03, 162.09, 157.93 (dd, *J*<sub>CF</sub> = 245.1, 2.3 Hz), 155.83 (dd, *J*<sub>CF</sub> = 242.2, 2.1 Hz), 147.08, 144.26, 144.22, 142.85, 142.34, 141.15, 139.02, 138.01 (d, *J*<sub>CF</sub> = 1.3 Hz), 137.56, 130.75, 130.25 (dd, *J*<sub>CF</sub> = 19.7, 3.6 Hz), 129.95, 128.40, 127.80, 127.56, 127.46, 125.36, 124.77 (dd, *J*<sub>CF</sub> = 17.1, 2.1 Hz), 116.69 (dd, *J* = 25.3, 16.6 Hz), 116.69 (d, *J* = 25.1 Hz), 80.29, 34.80, 28.01. **<sup>19</sup>F NMR** (471 MHz, CDCl<sub>3</sub>) δ -118.18

(d,  $J_{FF} = 17.6$  Hz), -120.73 (d,  $J_{FF} = 17.6$  Hz). **HRMS (ESI)** calcd for  $C_{33}H_{29}F_2N_3O_3Na$   $[M+Na]^+$ : 576.2069, found: 576.2065. **FTIR** (KBr,  $cm^{-1}$ ) 2951.40, 2836.45, 2718.69, 2368.22, 1597.20, 1358.88, 1199.07, 1070.09, 778.50, 576.64.

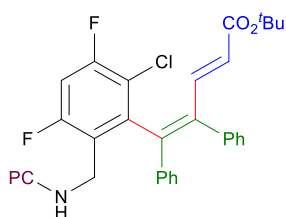

**Tert-butyl(2E,4E)-5-(2-chloro-3,5-difluoro-6-((pyrazine-2-carboxamido)methyl)phenyl)-4,5-diphenylpenta-2,4-dienoate (5w)** Following the general procedure 2 at the conditions of 110°C, **5w** was obtained as a yellow solid

(65.2 mg, 74% yield,  $E/Z=95:5$ , m.p. = 103.3 °C).  **$^1H$  NMR** (500 MHz,  $CDCl_3$ )  $\delta$  9.33 (s, 1H), 8.67 (d,  $J = 2.4$  Hz, 1H), 8.38 (dd,  $J = 2.4, 1.5$  Hz, 1H), 7.60 (s, 1H), 7.34 – 7.28 (m, 3H), 7.27 – 7.23 (m, 2H), 7.08 (d,  $J = 8.8$  Hz, 1H), 7.04 (d,  $J = 15.4$  Hz, 1H), 7.02 – 6.98 (m, 3H), 6.97 – 6.94 (m, 2H), 5.48 (d,  $J = 15.4$  Hz, 1H), 4.70 (dd,  $J = 14.4, 6.9$  Hz, 1H), 4.53 (dd,  $J = 14.9, 5.1$  Hz, 1H), 1.31 (s, 9H).  **$^{13}C$  NMR** (125 MHz,  $CDCl_3$ )  $\delta$  165.88, 162.05, 160.19 (dd,  $J_{CF} = 252.8, 12.7$  Hz), 158.18 (dd,  $J_{CF} = 253.7, 13.6$  Hz), 147.09, 144.21, 144.11, 143.10 (d,  $J_{CF} = 4.7$  Hz), 142.31, 140.68, 139.98, 137.80, 137.48, 130.64, 130.01, 128.54, 127.91, 127.78, 127.75, 125.90, 120.83 (dd,  $J_{CF} = 16.1, 4.1$  Hz), 117.74 (dd,  $J_{CF} = 17.1, 4.0$  Hz), 105.10 (dd,  $J_{CF} = 27.6, 25.3$  Hz), 80.43, 34.77 (d,  $J_{CF} = 3.4$  Hz), 28.01.  **$^{19}F$  NMR** (471 MHz,  $CDCl_3$ )  $\delta$  -107.19 (d,  $J_{FF} = 8.4$  Hz), -112.61 (d,  $J_{FF} = 8.3$  Hz). **HRMS (ESI)** calcd for  $C_{33}H_{28}ClF_2N_3O_3Na$   $[M+Na]^+$ : 610.1679, found: 610.1684. **FTIR** (KBr,  $cm^{-1}$ ) 2951.53, 2836.58, 2713.22, 2354.34, 1594.54, 1364.63, 1207.63, 1070.24, 784.27, 487.07.

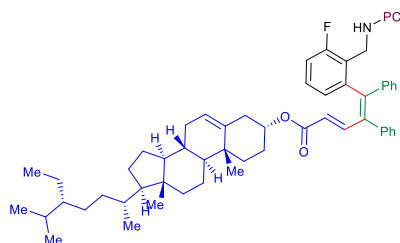

**(3S,8R,9R,10S,13S,14R,17S)-17-((2S,5S)-5-ethyl-6-methylheptan-2-yl)-10,13-dimethyl-2,3,4,7,8,9,10,11,12,13,14,15,16,17-tetradecahydro-1H-cyclopenta[a]phenanthren-3-yl(2E,4E)-5-(3-fluoro-2-((pyrazine-2-carboxamido)methyl)phenyl)-4,5-diphenylpenta-2,4-dienoate (5x)** Following the general procedure 2 at 110 °C, **5x** was

obtained as a yellow solid (68.3 mg, 52% yield,  $E/Z > 99:1$ , m.p. = 72.1 °C).  **$^1H$  NMR**

(500 MHz, CDCl<sub>3</sub>) δ 9.32 (s, 1H), 8.66 (s, 1H), 8.39 (s, 1H), 7.60 (s, 1H), 7.43 – 7.38 (m, 1H), 7.35 (d, *J* = 15.5 Hz, 1H), 7.31 – 7.21 (m, 3H), 7.21 – 7.12 (m, 4H), 7.01 – 6.86 (m, 5H), 5.53 (d, *J* = 15.5 Hz, 1H), 5.33 (d, *J* = 18.7 Hz, 1H), 4.71 – 4.54 (m, 2H), 4.47 (tt, *J* = 10.1, 4.3 Hz, 1H), 2.26 – 2.11 (m, 2H), 2.08 – 1.90 (m, 3H), 1.89 – 1.78 (m, 2H), 1.77 – 1.62 (m, 2H), 1.61 – 1.38 (m, 7H), 10.9, 10.5, 4.9 Hz, 7H), 1.37 – 0.89 (m, 20H), 0.88 – 0.75 (m, 8H), 0.68 (d, *J* = 9.1 Hz, 3H). **<sup>13</sup>C NMR** (125 MHz, CDCl<sub>3</sub>) δ 166.35, 162.20 (d, *J*<sub>CF</sub> = 248.8 Hz), 162.05, 146.97 (d, *J*<sub>CF</sub> = 3.6 Hz), 145.53, 144.75 (d, *J*<sub>CF</sub> = 3.7 Hz), 144.34, 144.25, 143.23 (d, *J*<sub>CF</sub> = 3.1 Hz), 142.28, 139.99 (d, *J*<sub>CF</sub> = 3.0 Hz), 139.62 (d, *J*<sub>CF</sub> = 6.4 Hz), 139.21, 137.95 (d, *J*<sub>CF</sub> = 1.4 Hz), 130.84, 130.36, 129.57 (d, *J*<sub>CF</sub> = 8.5 Hz), 128.44, 127.74, 127.49, 127.44, 127.24 (d, *J*<sub>CF</sub> = 2.9 Hz), 123.49 (d, *J*<sub>CF</sub> = 15.2 Hz), 122.98 (d, *J*<sub>CF</sub> = 6.1 Hz), 122.62, 115.67 (d, *J*<sub>CF</sub> = 22.3 Hz), 73.99, 56.69, 56.04, 49.99, 45.84, 42.31, 39.72, 38.05 (d, *J*<sub>CF</sub> = 5.3 Hz), 36.95 (d, *J*<sub>CF</sub> = 3.2 Hz), 36.58, 36.15, 35.04, 33.95, 31.87 (d, *J*<sub>CF</sub> = 5.9 Hz), 29.16, 28.25, 27.70 (d, *J*<sub>CF</sub> = 2.6 Hz), 26.08, 24.30, 23.08, 21.02, 19.84, 19.27, 19.06, 18.79, 18.28, 12.00, 11.86. **<sup>19</sup>F NMR** (471 MHz, CDCl<sub>3</sub>) δ -115.56. **HRMS (ESI)** calcd for C<sub>58</sub>H<sub>70</sub>FN<sub>3</sub>O<sub>3</sub>Na [M+Na]<sup>+</sup>: 898.2593, found: 898.2595.

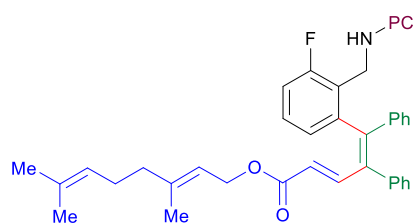

**(E)-3,7-dimethylocta-2,6-dien-1-yl (2E,4E)-5-(3-fluoro-2-((pyrazine-2-carboxamido) methyl)phenyl)-4,5-diphenylpenta-2,4-dienoate (5y)**

Following the general procedure 2 at 110 °C, **5y** was obtained as a yellow liquid (69.7 mg, 53% yield, *E/Z* = 96:4). **<sup>1</sup>H NMR** (500 MHz, CDCl<sub>3</sub>) δ 9.32 (d, *J* = 1.3 Hz, 1H), 8.67 – 8.64 (m, 1H), 8.41 – 8.35 (m, 1H), 7.58 (t, *J* = 5.2 Hz, 1H), 7.44 – 7.38 (m, 1H), 7.36 (d, *J* = 15.5 Hz, 1H), 7.29 – 7.22 (m, 3H), 7.16 (dd, *J* = 15.2, 7.5 Hz, 4H), 7.00 – 6.89 (m, 5H), 5.57 (d, *J* = 15.5 Hz, 1H), 5.23 (t, *J* = 7.0 Hz, 1H), 5.05 (t, *J* = 6.8 Hz, 1H), 4.66 – 4.56 (m, 2H), 4.55 – 4.44 (m, 2H), 2.10 – 2.03 (m, 2H), 2.03 – 1.97 (m, 2H), 1.66 (s, 3H), 1.63 (s, 3H), 1.58 (s, 3H). **<sup>13</sup>C NMR** (125 MHz, CDCl<sub>3</sub>) δ 166.93, 162.19 (d, *J*<sub>CF</sub> = 248.8 Hz), 162.05, 146.97, 145.58 (d, *J*<sub>CF</sub> = 2.3 Hz), 144.89, 144.32, 144.27, 143.24 (d, *J* = 3.5

Hz), 142.41, 142.26, 139.97, 139.21, 137.92, 131.84, 130.82, 130.35, 129.59 (d,  $J_{CF}$  = 9.3 Hz), 128.43, 127.74, 127.50, 127.45, 127.23 (d,  $J_{CF}$  = 3.1 Hz), 123.69, 123.48 (d,  $J_{CF}$  = 15.1 Hz), 122.70, 118.09, 115.69 (d,  $J_{CF}$  = 22.2 Hz), 61.18, 39.51, 35.03 (d,  $J_{CF}$  = 4.0 Hz), 26.28, 25.68, 17.69, 16.45.  **$^{19}\text{F}$  NMR** (471 MHz,  $\text{CDCl}_3$ )  $\delta$  -115.49. **HRMS (ESI)** calcd for  $\text{C}_{39}\text{H}_{38}\text{FN}_3\text{O}_3\text{Na}$   $[\text{M}+\text{Na}]^+$ : 638.2789, found: 638.2788.

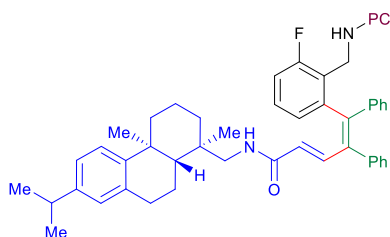

***N*-(2-fluoro-6-((1*E*,3*E*)-5-(((1*S*,4*aR*,10*aS*)-7-isopropyl-1,4*a*-dimethyl-1,2,3,4,4*a*,9,10,10*a*-octahydrophenanthren-1-yl)methyl)amino)-5-oxo-1,2-diphenylpenta-1,3-dien-1-yl)benzyl)pyrazine-2-carboxamide (**5z**)** Following the general procedure 2 at

110 °C, **5z** was obtained as a yellow solid (79.6 mg, 71% yield, *E/Z* > 99:1, m.p. = 193.9 °C).  **$^1\text{H}$  NMR** (500 MHz,  $\text{CDCl}_3$ )  $\delta$  9.28 (s, 1H), 8.61 (d,  $J$  = 12.6 Hz, 1H), 8.37 (d,  $J$  = 14.9 Hz, 1H), 7.66 – 7.53 (m, 1H), 7.41 – 7.05 (m, 10H), 7.02 – 6.85 (m, 7H), 5.45 (dd,  $J$  = 15.1, 10.6 Hz, 1H), 5.38 – 5.31 (m, 1H), 4.64 (dd,  $J$  = 14.1, 5.8 Hz, 1H), 4.57 – 4.49 (m, 1H), 3.18 – 2.95 (m, 2H), 2.93 – 2.69 (m, 3H), 2.24 (d,  $J$  = 12.6 Hz, 1H), 1.86 – 1.75 (m, 1H), 1.73 – 1.52 (m, 3H), 1.35 – 1.11 (m, 13H), 0.86 (s, 3H).  **$^{13}\text{C}$  NMR** (125 MHz,  $\text{CDCl}_3$ )  $\delta$  166.00, 165.85, 162.24 (dd,  $J_{CF}$  = 248.4, 2.4 Hz), 162.09, 147.15, 146.90, 145.69 (d,  $J_{CF}$  = 9.2 Hz), 144.42, 144.15, 143.30, 142.35, 141.38 (d,  $J_{CF}$  = 18.7 Hz), 140.33, 139.15 (d,  $J_{CF}$  = 5.0 Hz), 138.41 (d,  $J_{CF}$  = 3.9 Hz), 134.82 (d,  $J_{CF}$  = 10.8 Hz), 130.94, 130.34 (d,  $J_{CF}$  = 2.1 Hz), 129.56 (t,  $J_{CF}$  = 9.4 Hz), 128.40, 127.68, 127.33 (d,  $J_{CF}$  = 2.8 Hz), 127.26 (d,  $J_{CF}$  = 2.9 Hz), 127.16, 126.93 (d,  $J_{CF}$  = 3.5 Hz), 125.39 (d,  $J_{CF}$  = 16.2 Hz), 124.16, 123.87, 123.39 (d,  $J_{CF}$  = 15.0 Hz), 115.56 (dd,  $J_{CF}$  = 22.2, 2.7 Hz), 49.76 (d,  $J_{CF}$  = 3.1 Hz), 45.03 (d,  $J_{CF}$  = 15.5 Hz), 38.22 (d,  $J_{CF}$  = 3.2 Hz), 37.50 (d,  $J_{CF}$  = 19.4 Hz), 36.10, 35.20 (dd,  $J_{CF}$  = 6.1, 4.4 Hz), 33.45, 29.91 (d,  $J_{CF}$  = 47.9 Hz), 29.53 (d,  $J_{CF}$  = 37.5 Hz), 25.30 (d,  $J_{CF}$  = 6.9 Hz), 24.02, 18.89 (d,  $J_{CF}$  = 4.2 Hz), 18.80 (d,  $J_{CF}$  = 1.7 Hz), 18.55.  **$^{19}\text{F}$  NMR** (471 MHz,  $\text{CDCl}_3$ )  $\delta$  -115.64. **HRMS (ESI)** calcd for  $\text{C}_{49}\text{H}_{51}\text{FN}_4\text{O}_2\text{Na}$   $[\text{M}+\text{Na}]^+$ : 769.3888, found: 769.3890.

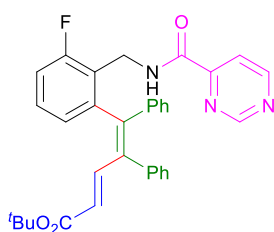

**Tert-butyl(2*E*,4*E*)-5-(3-fluoro-2-((pyrimidine-4-carboxamido) methyl) phenyl)-4,5-diphenylpenta-2,4-dienoate (5bb)**

Following the general procedure 2 at the conditions of 110°C, **5bb** was obtained as a yellow solid (61.0 mg, 76% yield, *E/Z*=96:4, m.p. = 63.8 °C). **<sup>1</sup>H NMR** (500 MHz, CDCl<sub>3</sub>)

δ 9.11 (s, 1H), 8.90 (d, *J* = 5.0 Hz, 1H), 8.05 (d, *J* = 6.1 Hz, 1H), 7.78 (s, 1H), 7.45 – 7.38 (m, 1H), 7.31 – 7.23 (m, 4H), 7.21 – 7.14 (m, 4H), 7.01 – 6.94 (m, 3H), 6.94 – 6.90 (m, 2H), 5.49 (d, *J* = 15.5 Hz, 1H), 4.66 – 4.54 (m, 2H), 1.33 (s, 9H). **<sup>13</sup>C NMR** (125 MHz, CDCl<sub>3</sub>) δ 166.23, 162.15 (d, *J*<sub>CF</sub> = 248.8 Hz), 161.69, 158.95, 157.49, 156.07, 145.07 (d, *J*<sub>CF</sub> = 2.2 Hz), 143.80, 143.31 (d, *J*<sub>CF</sub> = 3.4 Hz), 139.99, 139.24, 138.03, 131.98, 130.84, 130.32, 129.63 (d, *J*<sub>CF</sub> = 9.3 Hz), 128.39, 127.76, 127.43, 127.25 (d, *J*<sub>CF</sub> = 3.1 Hz), 124.55, 123.20 (d, *J*<sub>CF</sub> = 15.1 Hz), 118.43, 115.64 (d, *J*<sub>CF</sub> = 22.4 Hz), 80.28, 35.13 (d, *J*<sub>CF</sub> = 4.2 Hz), 28.03. **<sup>19</sup>F NMR** (471 MHz, CDCl<sub>3</sub>) δ -115.59. **HRMS (ESI)** calcd for C<sub>33</sub>H<sub>30</sub>FN<sub>3</sub>O<sub>3</sub>Na [M+Na]<sup>+</sup>: 558.2163, found: 558.2162. **FTIR** (KBr, cm<sup>-1</sup>) 2948.60, 2833.64, 2713.08, 2348.60, 1616.82, 1367.29, 1204.67, 1078.50, 778.50, 565.42.

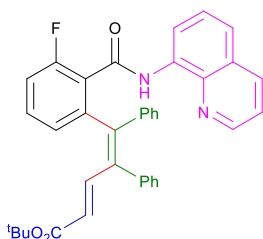

**Tert-butyl(2*E*,4*E*)-5-(3-fluoro-2-(quinolin-8-ylcarbonyl)phenyl)-4,5-diphenylpenta-2,4-dienoate (5dd)**

Following the general procedure 2, **5dd** was obtained as a colorless liquid (26.6 mg, 47% yield, *E/Z* > 99:1). **<sup>1</sup>H NMR** (500 MHz, CDCl<sub>3</sub>)

δ 10.12 (s, 1H), 8.75 (dd, *J* = 4.2, 1.6 Hz, 1H), 8.68 (dd, *J* = 5.2, 3.8 Hz, 1H), 8.12 (dd, *J* = 8.3, 1.6 Hz, 1H), 7.61 (d, *J* = 15.5 Hz, 1H), 7.53 – 7.47 (m, 3H), 7.42 (dd, *J* = 8.2, 4.2 Hz, 1H), 7.27 – 7.23 (m, 1H), 7.19 (d, *J* = 8.4 Hz, 1H), 7.17 – 7.12 (m, 3H), 7.11 – 7.07 (m, 2H), 6.95 – 6.81 (m, 5H), 5.44 (d, *J* = 15.5 Hz, 1H), 1.23 (s, 9H). **<sup>13</sup>C NMR** (125 MHz, CDCl<sub>3</sub>) δ 166.36, 161.89, 159.52 (d, *J*<sub>CF</sub> = 250.1 Hz), 148.12, 146.03 (d, *J*<sub>CF</sub> = 1.9 Hz), 143.92, 142.70 (d, *J*<sub>CF</sub> = 2.7 Hz), 140.61, 138.68, 138.36, 138.05, 136.07, 134.47, 131.00 (d, *J*<sub>CF</sub> = 10.7 Hz), 130.90 (d, *J*<sub>CF</sub> =

15.1 Hz), 128.04, 127.78, 127.61 (d,  $J_{CF} = 3.0$  Hz), 127.32, 127.30, 127.07, 127.04, 126.52, 126.39, 124.04, 121.72, 121.50, 116.53, 115.97 (d,  $J_{CF} = 22.4$  Hz).  **$^{19}\text{F}$  NMR** (471 MHz,  $\text{CDCl}_3$ )  $\delta$  -114.03. **HRMS (ESI)** calcd for  $\text{C}_{37}\text{H}_{31}\text{FN}_2\text{O}_3\text{Na}$   $[\text{M}+\text{Na}]^+$ : 593.2211 found: 593.2214. **FTIR** (KBr,  $\text{cm}^{-1}$ ) 3450.47, 2962.62, 2830.84, 2721.50, 2348.60, 1605.61, 1356.07, 1058.88, 767.29.

### 3.3 General Procedure 3 for Olefinic C-H Alkynylation

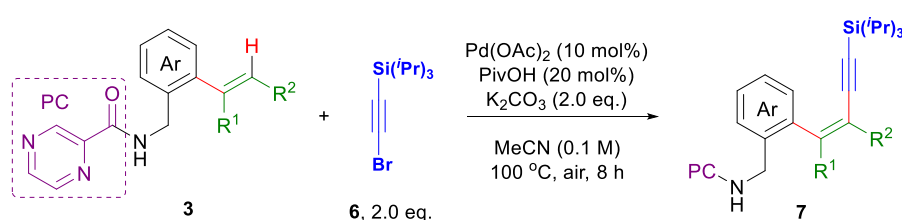

A screw-cap vial was charged with  $\text{Pd}(\text{OAc})_2$  (2.3 mg, 0.01 mmol, 10 mol%),  $\text{K}_2\text{CO}_3$  (27.6 mg, 0.2 mmol, 2.0 equiv), amide **3** (0.1 mmol, 1.0 equiv), MeCN (1.0 mL). Then, pivalic acid (2.1 mg, 0.02 mmol, 20 mol%), and alkyne **6** (52.3 mg, 0.2 mmol, 2.0 equiv) were added into the solution in sequence. The vial was sealed under air and heated to 100 °C with stirring for 8 h. After cooling down, the mixture was concentrated and directly applied to a flash column chromatography (PE/EA mixtures) for separation to obtain the diene product **7**.

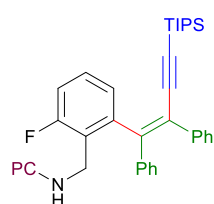

**(Z)-N-(2-(1,2-diphenyl-4-(triisopropylsilyl)but-1-en-3-yn-1-yl)-6-fluorobenzyl)pyrazine-2-carboxamide (7a)** Following the general procedure 3, **7a** was obtained as a yellow oil (42.5 mg, 72% yield,  $Z/E > 99:1$ ).  **$^1\text{H}$  NMR** (500 MHz,  $\text{CDCl}_3$ )  $\delta$  9.35 (s, 1H), 8.70 (d,  $J = 2.3$  Hz, 1H), 8.42 (s, 1H), 7.71 (s, 1H), 7.38 (dd,  $J = 6.5, 3.1$  Hz, 2H), 7.36 – 7.30 (m, 1H), 7.25 (d,  $J = 7.6$  Hz, 1H), 7.23 – 7.19 (m, 3H), 7.09 – 7.04 (m, 1H), 7.06 – 6.97 (m, 5H), 4.83 (dd,  $J = 14.3, 5.5$  Hz, 1H), 4.56 (dd,  $J = 14.2, 4.7$  Hz, 1H), 0.92 – 0.83 (m, 21H).  **$^{13}\text{C}$  NMR** (125 MHz,  $\text{CDCl}_3$ )  $\delta$  162.13, 162.07 (d,  $J_{CF} = 247.4$  Hz), 146.95, 146.18 (d,  $J_{CF} = 2.1$  Hz), 145.54 (d,  $J_{CF} = 3.6$  Hz), 144.56, 144.40, 142.22, 139.41, 138.08, 130.28, 129.95, 129.36, 129.28, 128.00, 127.55 (d,  $J_{CF} = 5.3$



(Hz), 126.73 (d,  $J_{CF} = 2.9$  Hz), 124.85, 123.13, 123.02, 114.86 (d,  $J_{CF} = 22.5$  Hz), 107.71, 97.67, 35.05 (d,  $J_{CF} = 4.5$  Hz), 18.47, 11.15.  **$^{19}\text{F}$  NMR** (471 MHz,  $\text{CDCl}_3$ )  $\delta$  -116.52. **HRMS (ESI)** calcd for  $\text{C}_{37}\text{H}_{40}\text{FN}_3\text{OSiNa}$   $[\text{M}+\text{Na}]^+$ : 612.2817, found: 612.2819.

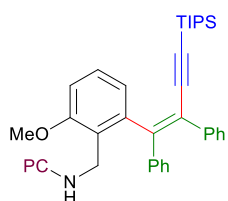

**(Z)-N-(2-(1,2-diphenyl-4-(triisopropylsilyl)but-1-en-3-yn-1-yl)-6-methoxybenzyl)pyrazine-2-carboxamide (7b)** Following the general procedure 3 at 110 °C for 12 h, **7b** was obtained as a yellow oil (18.7 mg, 31% yield,  $Z/E > 99:1$ ).  **$^1\text{H}$  NMR** (500 MHz,  $\text{CDCl}_3$ )  $\delta$  9.35 (s, 1H), 8.67 (d,  $J = 2.3$  Hz, 1H), 8.41 (s, 1H), 7.84 (s, 1H), 7.42 – 7.38 (m, 2H), 7.30 (t,  $J = 8.0$  Hz, 1H), 7.19 (q,  $J = 5.8$  Hz, 3H), 7.02 – 6.93 (m, 6H), 6.87 (d,  $J = 8.2$  Hz, 1H), 4.92 (dd,  $J = 14.0, 6.3$  Hz, 1H), 4.56 (dd,  $J = 14.0, 4.8$  Hz, 1H), 3.88 (s, 3H), 0.86 (d,  $J = 3.1$  Hz, 21H).  **$^{13}\text{C}$  NMR** (125 MHz,  $\text{CDCl}_3$ )  $\delta$  161.96, 158.63, 147.46, 146.68, 145.06, 144.82, 144.41, 142.22, 139.93, 138.40, 130.31, 130.02, 128.81, 127.92, 127.79, 127.29, 127.18, 124.32, 123.87, 122.91, 109.84, 108.03, 96.62, 55.67, 36.27, 18.49, 11.18. **HRMS (ESI)** calcd for  $\text{C}_{38}\text{H}_{44}\text{N}_3\text{O}_2\text{Si}$   $[\text{M}+\text{H}]^+$ : 602.3197, found: 602.3194.

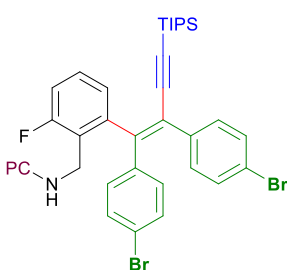

**(Z)-N-(2-(1,2-bis(4-bromophenyl)-4-(triisopropylsilyl)but-1-en-3-yn-1-yl)-6-fluorobenzyl)pyrazine-2-carboxamide (7c)** Following the general procedure 3 at 110 °C for 12 h, **7c** was obtained as a yellow oil (24.6 mg, 33% yield,  $Z/E > 99:1$ ).  **$^1\text{H}$  NMR** (500 MHz,  $\text{CDCl}_3$ )  $\delta$  9.35 – 9.32 (m, 1H), 8.70 (d,  $J = 2.4$  Hz, 1H), 8.44 (dd,  $J = 2.3, 1.5$  Hz, 1H), 7.59 (s, 1H), 7.37 (d,  $J = 8.5$  Hz, 2H), 7.34 – 7.30 (m, 1H), 7.25 (d,  $J = 9.4$  Hz, 2H), 7.20 – 7.15 (m, 3H), 7.08 (t,  $J = 8.7$  Hz, 1H), 6.87 (s, 2H), 4.75 (dd,  $J = 14.5, 5.7$  Hz, 1H), 4.59 (dd,  $J = 14.3, 5.3$  Hz, 1H), 0.87 (s, 21H).  **$^{13}\text{C}$  NMR** (125 MHz,  $\text{CDCl}_3$ )  $\delta$  162.22 (d,  $J_{CF} = 247.4$  Hz), 162.09, 147.16, 145.27 (d,  $J_{CF} = 2.3$  Hz), 144.81 (d,  $J_{CF} = 3.7$  Hz), 144.34, 144.27, 142.43, 138.23, 136.81, 131.86, 131.50, 131.45, 131.43, 129.54 (d,  $J_{CF} = 9.2$  Hz), 126.52 (d,

$J_{CF} = 2.9$  Hz), 124.28, 123.15 (d,  $J_{CF} = 15.3$  Hz), 122.18, 121.99, 115.21 (d,  $J_{CF} = 22.2$  Hz), 106.91, 98.75, 35.04 (d,  $J_{CF} = 4.2$  Hz), 18.45, 11.09.  **$^{19}\text{F}$  NMR** (471 MHz,  $\text{CDCl}_3$ )  $\delta$  -116.16. **HRMS (ESI)** calcd for  $\text{C}_{37}\text{H}_{39}\text{Br}_2\text{FN}_3\text{OSi}$   $[\text{M}+\text{H}]^+$ : 746.1208, found: 746.1207.

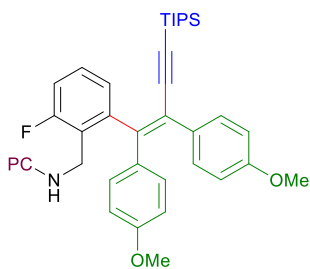

**(Z)-N-(2-(1,2-bis (4-methoxyphenyl)-4-(triisopropylsilyl) but-1-en-3-yn-1-yl)-6-fluorobenzyl)pyrazine-2-carboxamide (7d)** Following the general procedure 3, 7d was obtained as a yellow oil (37.0 mg, 57% yield,  $Z/E > 99:1$ ).

**$^1\text{H}$  NMR** (500 MHz,  $\text{CDCl}_3$ )  $\delta$  9.33 (d,  $J = 1.2$  Hz, 1H), 8.67 (d,  $J = 2.4$  Hz, 1H), 8.41 – 8.37 (m, 1H), 7.58 (s, 1H), 7.33 (d,  $J = 8.8$  Hz, 2H), 7.32 – 7.28 (m, 1H), 7.23 (d,  $J = 6.9$  Hz, 1H), 7.04 (t,  $J = 8.7$  Hz, 1H), 6.91 (d,  $J = 8.8$  Hz, 2H), 6.75 (d,  $J = 8.8$  Hz, 2H), 6.56 (d,  $J = 8.9$  Hz, 2H), 4.74 (dd,  $J = 14.4, 5.5$  Hz, 1H), 4.56 (dd,  $J = 14.3, 5.4$  Hz, 1H), 3.78 (s, 3H), 3.62 (s, 3H), 0.87 (s, 21H).  **$^{13}\text{C}$  NMR** (125 MHz,  $\text{CDCl}_3$ )  $\delta$  162.08, 162.04 (d,  $J_{CF} = 247.4$  Hz), 158.86 (d,  $J_{CF} = 3.2$  Hz), 146.89, 146.08 (d,  $J_{CF} = 3.4$  Hz), 144.64 (d,  $J_{CF} = 2.2$  Hz), 144.56, 144.33, 142.24, 132.08, 131.61, 131.14, 130.61, 129.27 (d,  $J_{CF} = 9.2$  Hz), 126.78 (d,  $J_{CF} = 2.9$  Hz), 123.01, 122.89, 122.85, 114.69 (d,  $J_{CF} = 22.5$  Hz), 113.50, 113.43, 108.18, 96.69, 55.18, 54.99, 35.03 (d,  $J_{CF} = 4.5$  Hz), 18.50, 11.16.  **$^{19}\text{F}$  NMR** (471 MHz,  $\text{CDCl}_3$ )  $\delta$  -116.60. **HRMS (ESI)** calcd for  $\text{C}_{39}\text{H}_{44}\text{FN}_3\text{O}_3\text{SiNa}$   $[\text{M}+\text{Na}]^+$ : 640.3130, found: 640.3131.

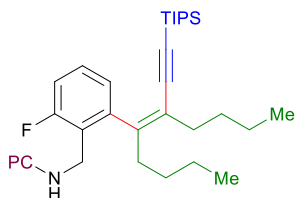

**(Z)-N-(2-fluoro-6-(6-((triisopropylsilyl)ethynyl)dec-5-en-5-yl)benzyl)pyrazine-2-carboxamide (7e)** Following the general procedure 3, 7e was obtained as a yellow oil (35.7 mg, 65% yield,  $Z/E > 99:1$ ).  **$^1\text{H}$  NMR** (500 MHz,  $\text{CDCl}_3$ )  $\delta$

9.40 (s, 1H), 8.70 (d,  $J = 2.3$  Hz, 1H), 8.44 (s, 1H), 7.93 (s, 1H), 7.25 – 7.19 (m, 1H), 6.96 (t,  $J = 9.0$  Hz, 1H), 6.90 (d,  $J = 7.6$  Hz, 1H), 4.87 (dd,  $J = 14.4, 6.7$  Hz, 1H), 4.48 (dd,  $J = 14.4, 4.1$  Hz, 1H), 2.59 – 2.50 (m, 1H), 2.38 – 2.20 (m, 3H), 1.65 – 1.57 (m,

2H), 1.44 – 1.36 (m, 2H), 1.31 – 1.22 (m, 4H), 0.91 (t,  $J = 7.3$  Hz, 3H), 0.87 – 0.78 (m, 24H). **<sup>13</sup>C NMR** (125 MHz, CDCl<sub>3</sub>)  $\delta$  162.26, 162.12 (d,  $J_{CF} = 246.7$  Hz), 147.01, 146.07 (d,  $J_{CF} = 2.1$  Hz), 145.94 (d,  $J_{CF} = 3.6$  Hz), 144.67, 144.48, 142.38, 128.97 (d,  $J_{CF} = 9.4$  Hz), 125.23 (d,  $J_{CF} = 2.9$  Hz), 123.67, 121.99 (d,  $J_{CF} = 14.4$  Hz), 113.86 (d,  $J_{CF} = 22.1$  Hz), 107.10, 93.85, 35.43 (d,  $J_{CF} = 3.5$  Hz), 33.76, 31.37, 30.77, 30.20, 22.88, 22.38, 18.42 (d,  $J = 3.9$  Hz), 14.02, 13.85, 11.11. **<sup>19</sup>F NMR** (471 MHz, CDCl<sub>3</sub>)  $\delta$  -116.86. **HRMS (ESI)** calcd for C<sub>33</sub>H<sub>48</sub>FN<sub>3</sub>OSiNa [M+Na]<sup>+</sup>: 572.3443, found: 572.3443.

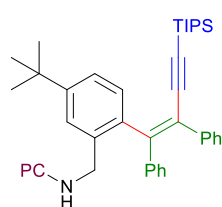

**(Z)-N-(5-(tert-butyl)-2-(1,2-diphenyl-4-(triisopropylsilyl)but-1-en-3-yn-1-yl)benzyl)pyrazine-2-carboxamide (7f)** Following the general procedure 3 for 12 h, **7f** was obtained as a yellow oil (32.7 mg, 52% yield,  $Z/E > 99:1$ ). **<sup>1</sup>H NMR** (500 MHz, CDCl<sub>3</sub>)  $\delta$

9.36 (s, 1H), 8.73 – 8.66 (m, 1H), 8.48 – 8.39 (m, 1H), 7.76 (s, 1H), 7.42 – 7.38 (m, 2H), 7.37 – 7.34 (m, 3H), 7.20 – 7.16 (m, 3H), 7.05 – 7.02 (m, 3H), 7.01 – 6.98 (m, 2H), 4.61 (s, 1H), 4.41 (s, 1H), 1.32 (s, 9H), 0.87 (d,  $J = 4.0$  Hz, 21H). **<sup>13</sup>C NMR** (125 MHz, CDCl<sub>3</sub>)  $\delta$  162.34, 151.04, 148.06, 146.92, 144.73, 144.38, 142.26, 139.99, 139.76, 138.43, 134.72, 130.88, 130.27, 130.00, 127.95, 127.90, 127.39, 127.33, 126.94, 124.96, 124.02, 108.23, 96.73, 42.32, 34.58, 31.36, 18.57, 11.19. **HRMS (ESI)** calcd for C<sub>41</sub>H<sub>49</sub>N<sub>3</sub>OSiNa [M+Na]<sup>+</sup>: 650.3537, found: 650.3538.

### 3.4 General Procedure 4 for Olefinic C-H Alkylation

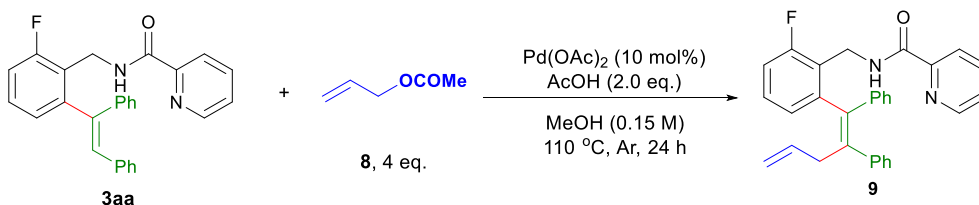

A screw-cap vial was charged with Pd(OAc)<sub>2</sub> (2.3 mg, 0.01 mmol, 10 mol%), amide **3aa** (0.1 mmol, 1.0 equiv), MeOH (0.7 mL). Then, AcOH (12.0 mg, 0.2 mmol, 2.0 equiv), and Allyl acetate **8** (40.0 mg, 0.4 mmol, 4.0 equiv) were added into the

solution in sequence. The vial was sealed under argon and heated to 110°C with stirring for 24 h. After cooling down, the mixture was concentrated and directly applied to a flash column chromatography (PE/EA mixtures) to obtain the diene product **9**.

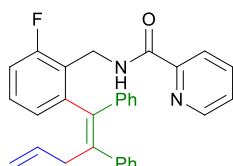

**(E)-N-(2-(1,2-diphenylpenta-1,4-dien-1-yl)-6-fluorobenzyl)picolinamide (9)** Following the **general procedure 4**, **9** was obtained as a yellow oil (19.7 mg, 44% yield, *E/Z* > 99:1). **<sup>1</sup>H NMR** (500 MHz, CDCl<sub>3</sub>) δ 8.51 (d, *J* = 4.4 Hz, 1H), 8.19 (d, *J* = 7.8 Hz, 1H), 7.92 (s, 1H), 7.88 – 7.79 (m, 1H), 7.43 – 7.35 (m, 2H), 7.27 (d, *J* = 6.7 Hz, 2H), 7.21 – 7.14 (m, 4H), 7.10 (t, *J* = 8.9 Hz, 1H), 7.02 – 6.91 (m, 5H), 5.66 – 5.54 (m, 1H), 4.88 – 4.77 (m, 2H), 4.61 (dd, *J* = 14.1, 5.1 Hz, 1H), 4.48 (dd, *J* = 14.2, 7.5 Hz, 1H), 3.14 (dd, *J* = 14.9, 6.4 Hz, 1H), 3.00 (dd, *J* = 14.9, 6.7 Hz, 1H). **<sup>13</sup>C NMR** (125 MHz, CDCl<sub>3</sub>) δ 163.07, 162.26 (d, *J*<sub>CF</sub> = 292.1 Hz), 149.92, 147.83, 144.79 (d, *J*<sub>CF</sub> = 3.4 Hz), 141.18, 140.50, 140.32, 137.23, 137.14 (d, *J*<sub>CF</sub> = 2.4 Hz), 135.28, 130.25, 129.76, 128.98 (d, *J*<sub>CF</sub> = 9.2 Hz), 127.96, 127.68, 126.67, 126.35, 126.32, 126.02, 123.35 (d, *J*<sub>CF</sub> = 14.8 Hz), 122.20, 116.08, 114.74 (d, *J*<sub>CF</sub> = 22.6 Hz), 41.12, 34.74 (d, *J*<sub>CF</sub> = 4.5 Hz). **<sup>19</sup>F NMR** (471 MHz, CDCl<sub>3</sub>) δ -115.90. **HRMS (ESI)** calcd for C<sub>30</sub>H<sub>25</sub>FN<sub>2</sub>ONa [M+Na]<sup>+</sup>: 471.1843, found: 471.1843.

## 4. Deuterium-Labelled Experiments

### 4.1 Rh-Catalyzed H/D Exchange in Hydroarylation

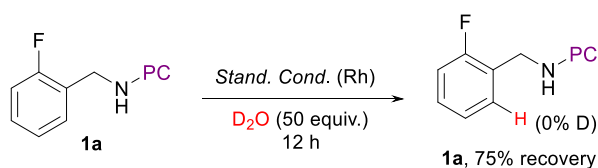

A screw-cap vial was charged with [Rh(cod)Cl]<sub>2</sub> (1.0 mg, 0.002 mmol, 2 mol%), AgSbF<sub>6</sub> (1.7 mg, 0.0050 mmol, 0.05 equiv), NaOAc (8.2 mg, 0.10 mmol, 1.0 equiv),

amide **1a** (23.1 mg, 0.10 mmol, 1.0 equiv), DCE (1.0 mL) and D<sub>2</sub>O (5 mmol, 50.0 equiv) in sequence. The vial was sealed under argon and heated to 120 °C with stirring for 12 h. After cooling down, the mixture was directly applied to a flash column chromatography (PE/EA mixtures) to obtain **1a** and **1a-d**. Deuterium incorporation was determined by <sup>1</sup>H NMR analysis.

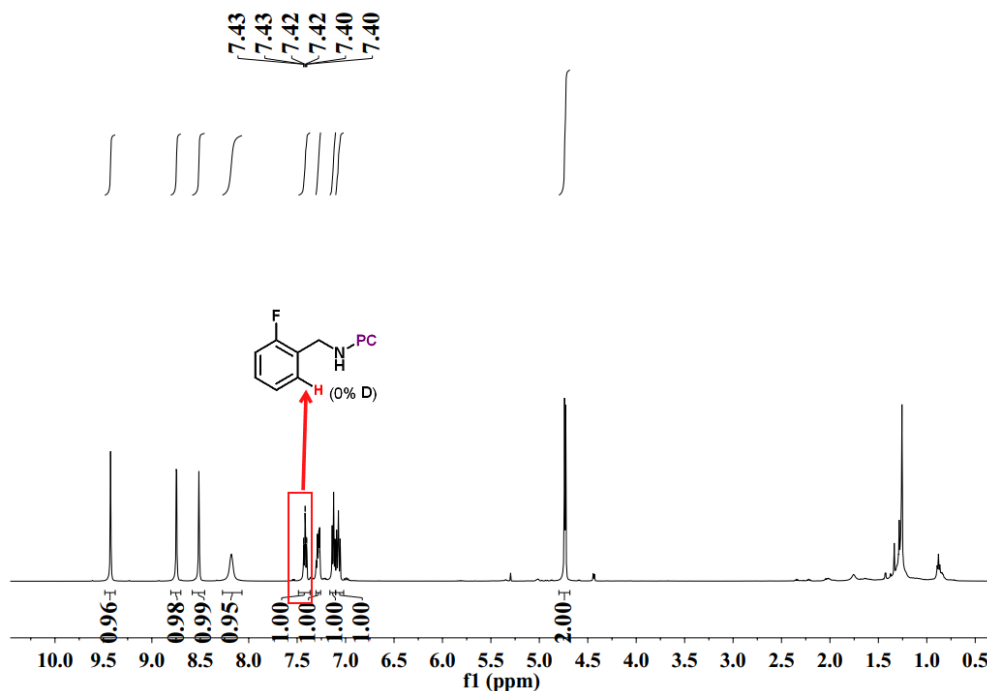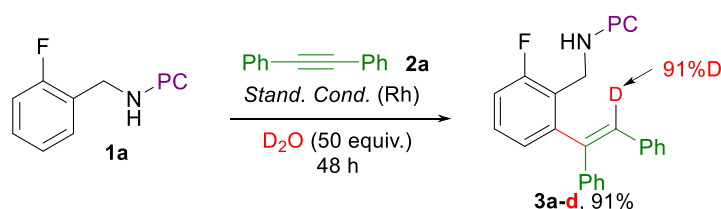

A screw-cap vial was charged with [Rh(cod)Cl]<sub>2</sub> (1.5 mg, 0.003 mmol, 2 mol%), AgSbF<sub>6</sub> (2.6 mg, 0.0075 mmol, 0.05 equiv), NaOAc (12.3 mg, 0.15 mmol, 1.00 equiv), amide **1a** (0.15 mmol, 1.0 equiv), **2a** (53.3 mg, 0.30 mmol, 2.00 equiv), DCE (1.5 mL) and D<sub>2</sub>O (7.5 mmol, 50.0 equiv) in sequence. The vial was sealed under Argon and heated to 120 °C with stirring for 48 h. After cooling down, the mixture was directly applied to a flash column chromatography (PE/EA mixtures) to obtain the corresponding product **3a** and **3a-d**. Deuterium incorporation was determined by <sup>1</sup>H NMR analysis.

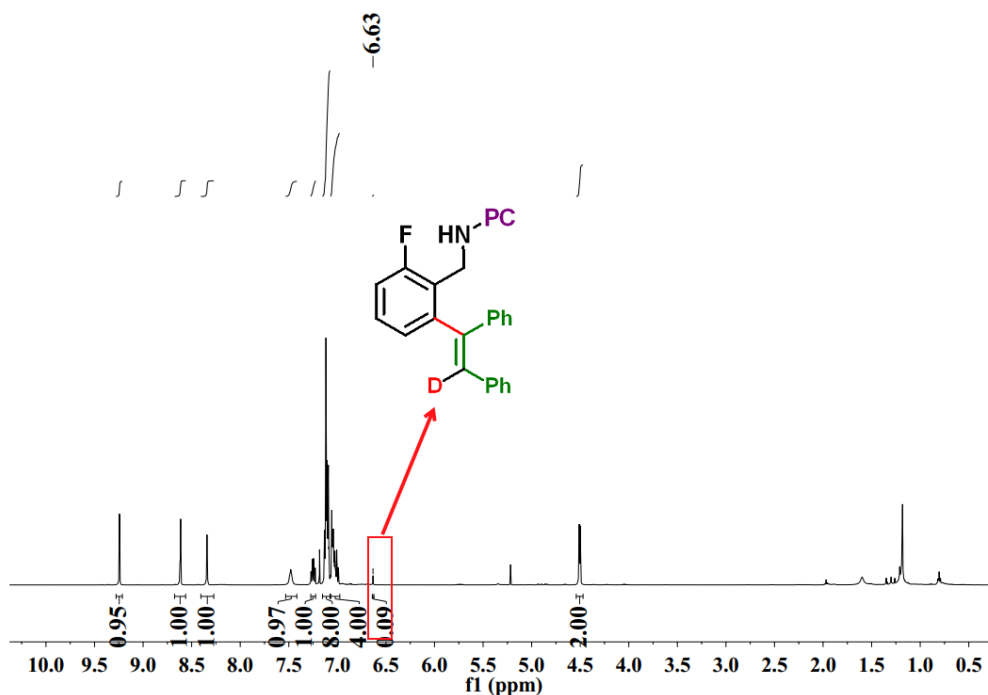

## 4.2 Pd-Catalyzed H/D Exchange

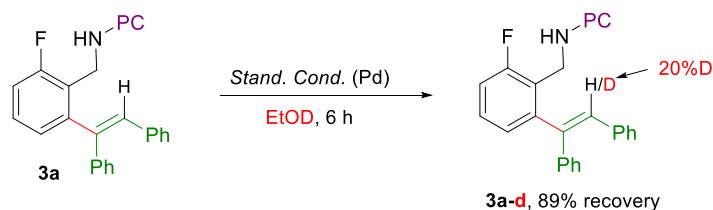

A screw-cap vial was charged with Pd(OAc)<sub>2</sub> (3.4 mg, 0.015 mmol, 15 mol%), MnO<sub>2</sub> (26.1 mg, 0.3 mmol, 3.0 equiv), BQ (1.1 mg, 0.01 mmol, 10 mol%), amide **3a** (40.9 mg, 0.10 mmol, 1.0 equiv), and EtOD (0.7 mL) was added. Then, pivalic acid (15.3 mg, 0.15 mmol, 1.5 equiv) were added into the solution in sequence. The vial was sealed under air and heated to 80 °C with stirring for 6 h. After cooling down, the mixture was directly applied to a flash column chromatography (PE/EA mixtures) to obtain the mixture **3a** and **3a-d**. Deuterium incorporation was determined by <sup>1</sup>H NMR analysis.

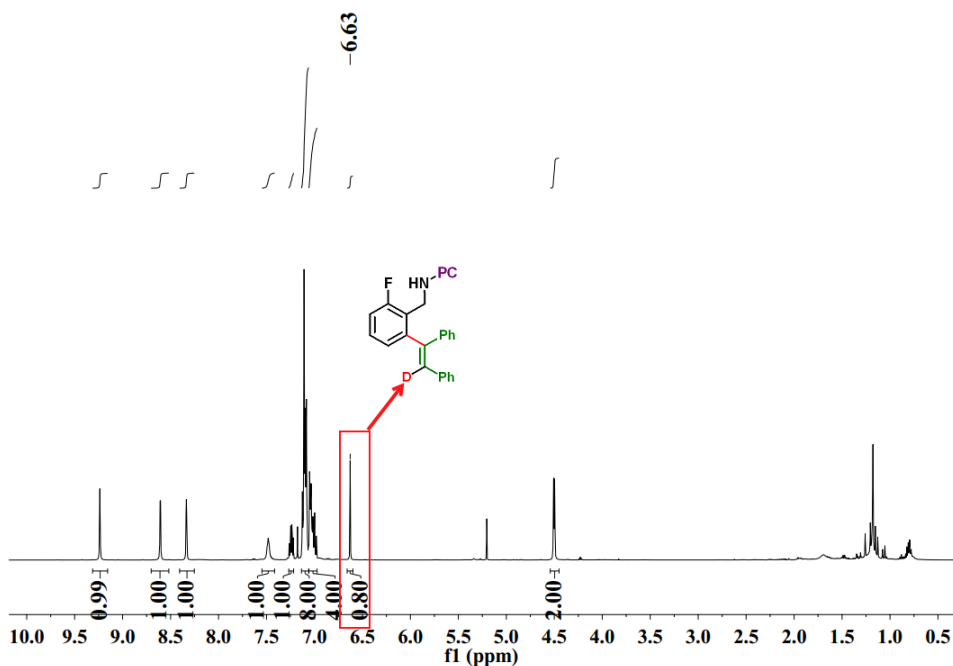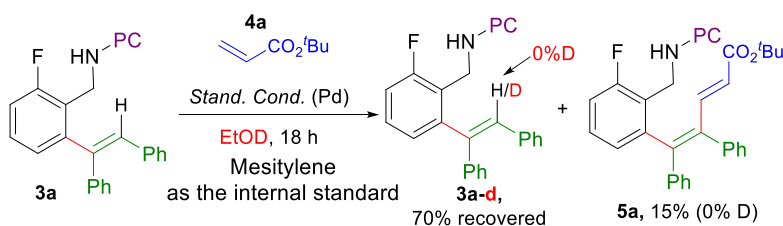

A screw-cap vial was charged with Pd(OAc)<sub>2</sub> (3.4 mg, 15 mol%, 0.015 mmol), MnO<sub>2</sub> (26.1 mg, 0.3 mmol, 3.0 equiv), BQ (1.1 mg, 0.01 mmol, 10 mol%), amide **3a** (40.9 mg, 0.10 mmol, 1.0 equiv) and EtOD (0.7 mL) was added. Then, pivalic acid (15.3 mg, 0.15 mmol, 1.5 equiv), and t-butyl acrylate **4a** (32.0 mg, 0.25 mmol, 2.5 equiv) were added into the solution in sequence. The vial was sealed under air and heated to 80 °C with stirring for 18 h. After cooling down, the mixture was directly applied to a flash column chromatography (PE/EA mixtures) to obtain the mixture **3a-d** and **5a**. To the reaction residue was added mesitylene (0.1 mmol, 13.5 μL, 12.0 mg) as the internal standard. The yield and deuterium incorporation of **3a-d** and **5a** were analyzed with <sup>1</sup>H NMR.

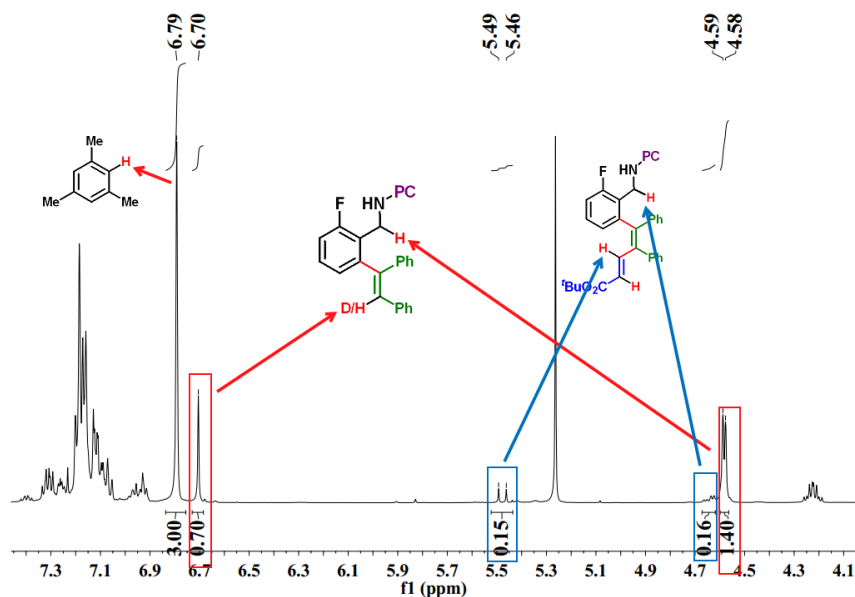

## 5. KIE Experiments

### 5.1 Parallel KIE experiments with **1a** or **1a-d**

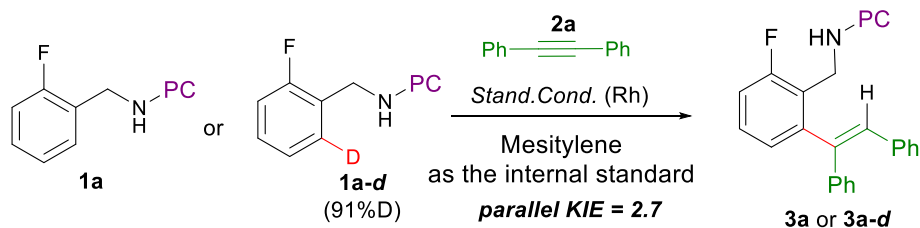

A screw-cap vial was charged with  $[\text{Rh}(\text{cod})\text{Cl}]_2$  (1.0 mg, 0.002 mmol, 2 mol%),  $\text{AgSbF}_6$  (1.7 mg, 0.0050 mmol, 0.05 equiv),  $\text{NaOAc}$  (8.2 mg, 0.10 mmol, 1.00 equiv), amide **1a** (23.1 mg, 0.10 mmol, 1.0 equiv) or **1a-d** (23.2 mg, 0.10 mmol, 1.0 equiv), **2a** (35.6 mg, 0.20 mmol, 2.0 equiv) and DCE (1.0 mL) in sequence. The vial was sealed under argon and heated to 120 °C with stirring for corresponding reaction time. After cooling down, the reaction mixture was filtrated through a short column of silica gel eluted with PE/EA mixtures and concentration in vacuo. To the reaction residue was added mesitylene (0.1 mmol, 13.5  $\mu\text{L}$ , 12.0 mg) as the internal standard and the yield of **3a** or **3a-d** was analyzed with  $^1\text{H}$  NMR measurement. Yields and concentrations of **3a** or **3a-d** were used to obtain reaction rate profiles. A KIE value was determined to be 2.7.



The relevant data are listed below:

| Parallel KIE in Rh-catalysed cross coupling |              |                   |         |              |                   |
|---------------------------------------------|--------------|-------------------|---------|--------------|-------------------|
| 1a-d                                        |              |                   | 1a      |              |                   |
| Time(h)                                     | 5a yield (%) | Concentration [M] | Time(h) | 5a yield (%) | Concentration [M] |
| 4                                           | 9            | 0.009             | 2       | 7            | 0.007             |
| 8                                           | 14           | 0.014             | 4       | 15           | 0.015             |
| 12                                          | 18           | 0.018             | 6       | 20           | 0.02              |
| 16                                          | 21           | 0.021             | 8       | 26           | 0.026             |
| 20                                          | 25           | 0.025             | 10      | 33           | 0.033             |
| (M/h)                                       | 0.0012       |                   | (M/h)   | 0.0032       |                   |
| $k_H/k_D$                                   | 2.7          |                   |         |              |                   |

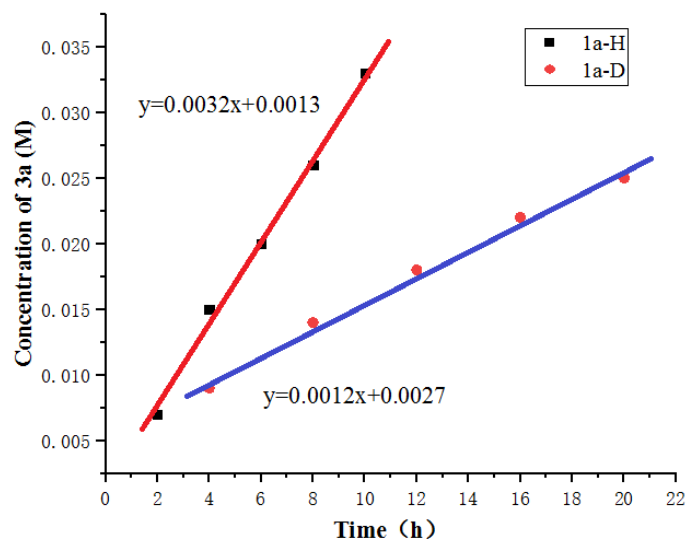

## 5.2 Parallel KIE experiments with 3a and 3a-d

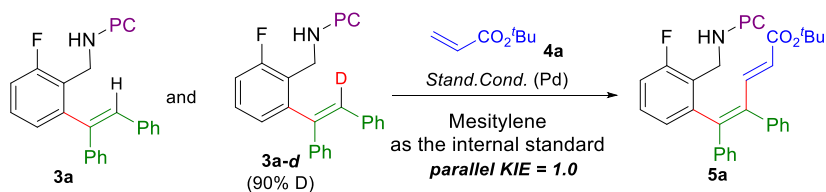

A screw-cap vial was charged with Pd(OAc)<sub>2</sub> (3.4 mg, 15 mol%, 0.015 mmol), MnO<sub>2</sub> (26.1 mg, 0.3 mmol, 3.0 equiv), BQ (1.1 mg, 0.01 mmol, 10 mol%), amide **3a**

(40.9 mg, 0.10 mmol, 1.0 equiv) or **3a-d** (40.9 mg, 0.10 mmol, 1.0 equiv) and EtOH (0.7 mL) was added. Then, pivalic acid (15.3 mg, 0.15 mmol, 1.5 equiv), and tert-butyl acrylate **4a** (32.0 mg, 0.25 mmol, 2.5 equiv) were added into the solution in sequence. The vial was sealed under air and heated to 80 °C with stirring for corresponding reaction time. After cooling down, the reaction mixture was filtrated through a short column of silica gel eluted with PE/EA mixtures and concentration in vacuo. To the reaction residue was added mesitylene (0.1 mmol, 13.5  $\mu$ L, 12.0 mg) as the internal standard and the yield of **5a** was analyzed with  $^1\text{H}$  NMR measurement. Yields and concentrations of **5a** were used to obtain reaction rate profiles. A KIE value was determined to be **1.0**.

The relevant data are listed below:

| Parallel KIE in Pd-catalysed cross coupling |                     |             |
|---------------------------------------------|---------------------|-------------|
|                                             | <b>3a</b>           | <b>3a-d</b> |
| Time (h)                                    | <b>5a</b> yield (%) |             |
| 3                                           | 4                   | 6           |
| 4                                           | 4                   | -           |
| 6                                           | 5                   | 7           |
| 8                                           | 6                   | -           |
| 9                                           | -                   | 9           |
| 10                                          | 8                   | -           |
| 12                                          | 11                  | 13          |
| 15                                          | 18                  | 19          |
| 18                                          | 26                  | 25          |
| 20                                          | 30                  | -           |
| 21                                          | -                   | 33          |
| 22                                          | 39                  | -           |
| 24                                          | 73                  | 62          |
| <i>k<sub>H</sub>/k<sub>D</sub></i>          | <b>1.0</b>          |             |

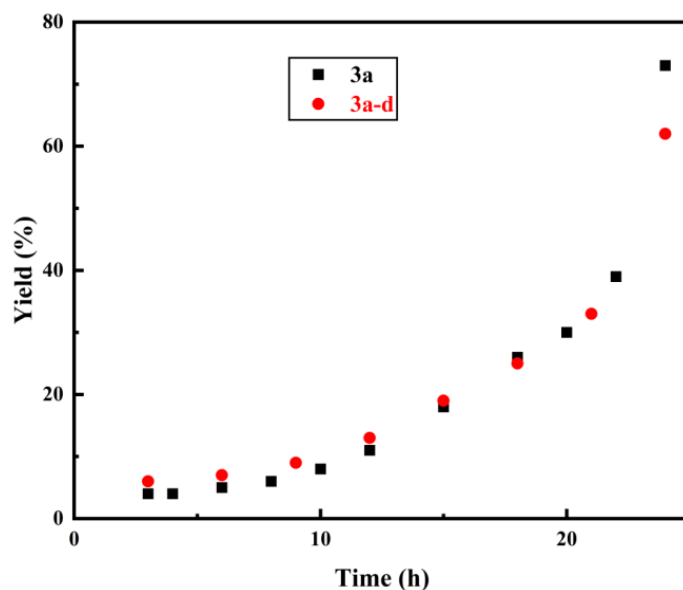

## 6. Synthetic Applications

### 6.1 Scaled-up Preparation

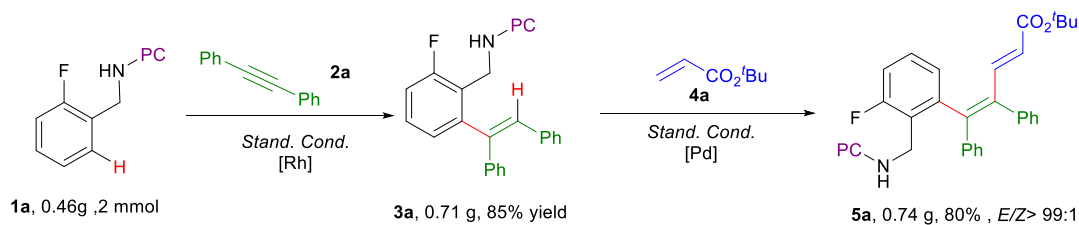

A screw-cap vial was charged with  $[\text{Rh}(\text{cod})\text{Cl}]_2$  (19.9 mg, 0.04 mmol, 2 mol%),  $\text{AgSbF}_6$  (34.4 mg, 0.10 mmol, 0.05 equiv),  $\text{NaOAc}$  (164.1 mg, 2 mmol, 1.0 equiv), amide **1a** (0.46 g, 2.0 mmol, 1.0 equiv), diphenylacetylene (0.71 g, 4 mmol, 2.00 equiv) and DCE (20 mL) in sequence. The vial was sealed under Argon and heated to 120 °C with stirring for 48 h. After cooling down, the mixture was directly applied to a flash column chromatography (PE/EA mixtures) to obtain the corresponding product **3a** (0.71 g, 85% yield).

A screw-cap vial was charged with  $\text{Pd}(\text{OAc})_2$  (38.8 mg, 10 mol%),  $\text{MnO}_2$  (270.6 mg, 3.0 equiv), BQ (11.1 mg, 10 mol%), amide **3a** (0.71 g, 1.73 mmol, 1.0 equiv), EtOH (11 mL). Then, pivalic acid (265.4 mg, 1.5 equiv), and olefin **4a** (332.5 mg, 2.5

equiv) were added into the solution in sequence. The vial was sealed under air and heated to 80 °C with stirring for 24 h. After cooling down, the mixture was directly applied to a flash column chromatography (PE/EA mixtures) to obtain the corresponding product **5a** (0.74 g, 80% yield, *E/Z* > 99:1).

## 6.2 DG Removal

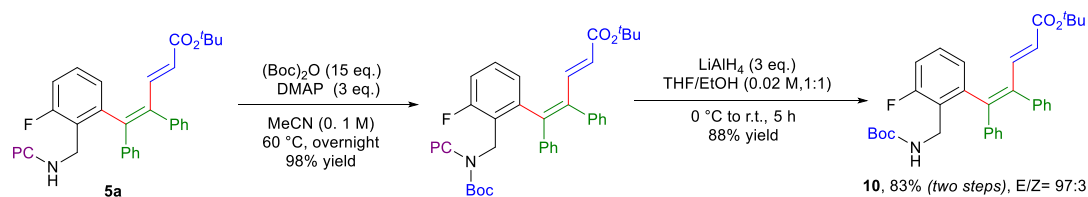

DG removal experiment was performed according to previous literature<sup>[8]</sup>. Boc-anhydride (327.4 mg, 15.0 equiv, 1.5 mmol) was added to a solution of **5a** (53.5 mg, 0.1 mmol, 1.0 equiv) and DMAP (43.3 mg, 0.3 mmol, 3.0 equiv) in MeCN (1 mL) and the reaction mixture was heated to 60 °C and stirred overnight until the reaction is completed. The reaction mixture was quenched with NH<sub>4</sub>Cl (10 mL, sat. aq.) and extracted with CH<sub>2</sub>Cl<sub>2</sub> (20 mL × 3). The organic layers were combined and dried over Na<sub>2</sub>SO<sub>4</sub>. After filtration and concentration in vacuo, the crude residue was purified by chromatography on silica gel (SiO<sub>2</sub>, PE / EA = 40:1 to 20: 1) to give N-Boc-amide as a pale yellow solid (110.9 mg, 76% yield, *E/Z* = 95:5). Then to a solution of N-Boc-amide in THF/EtOH (0.02 M, v:v=1:1) was added LiAlH<sub>4</sub> (3.0 equiv, 2.5 M in Et<sub>2</sub>O) in dropwise over 30 min at 0°C and stirred at room temperature for 5 h, and 2 N NaOH was added slowly at 0°C until a clear solution was obtained. The organic layer was separated and the aqueous phase was extracted with Et<sub>2</sub>O (20 mL × 3). The organic layers were combined and dried over Na<sub>2</sub>SO<sub>4</sub>. After filtration and concentration in vacuo, the crude residue was purified by chromatography on silica gel with PE/EA to result N-boc benzylamine **10** as a white solid (44.0 mg, 88% yield, *E/Z* = 97:3, 83% yield for two steps, m.p. = 73.9 °C).

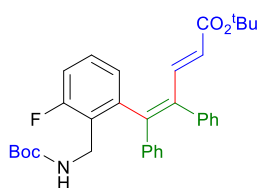

**Tert-Butyl (2E,4E)-5-(2-(((tert-butoxycarbonyl) amino) methyl)-3-fluorophenyl)-4,5-diphenylpenta-2,4-dienoate (10)**

According to previous literature reports, **10** was obtained as a white solid (44.0 mg, 88% yield, *E/Z* = 97:3, 83% yield for two steps, m.p. = 73.9 °C). **<sup>1</sup>H NMR** (500 MHz, CDCl<sub>3</sub>) δ 7.31 – 7.11 (m, 7H), 7.05 – 6.98 (m, 2H), 6.97 – 6.91 (m, 3H), 6.85 – 6.78 (m, 2H), 5.44 (d, *J* = 15.5 Hz, 1H), 4.38 (s, 1H), 4.21 (d, *J* = 5.1 Hz, 2H), 1.31 (s, 9H), 1.30 (s, 9H). **<sup>13</sup>C NMR** (125 MHz, CDCl<sub>3</sub>) δ 166.48, 162.21 (d, *J*<sub>CF</sub> = 248.1 Hz), 155.15, 145.23 (d, *J*<sub>CF</sub> = 2.4 Hz), 144.07, 142.90 (d, *J*<sub>CF</sub> = 2.6 Hz), 140.28, 138.86, 138.12, 130.87, 130.35, 129.16 (d, *J*<sub>CF</sub> = 9.5 Hz), 128.34, 127.68, 127.34 (d, *J* = 2.6 Hz), 126.86, 124.68, 124.53, 124.23, 115.35 (d, *J*<sub>CF</sub> = 21.5 Hz), 80.28, 79.12, 36.39 (d, *J*<sub>CF</sub> = 2.8 Hz), 28.37, 28.09. **<sup>19</sup>F NMR** (471 MHz, CDCl<sub>3</sub>) δ -116.04. **HRMS (ESI)** calcd for C<sub>33</sub>H<sub>2</sub>FNO<sub>4</sub>Na [M+Na]<sup>+</sup>: 552.2521, found: 552.2527. **FTIR** (KBr, cm<sup>-1</sup>) 2959.81, 2830.84, 2718.69, 2348.60, 1608.41, 1210.28, 1064.49, 775.70, 568.22.

### 6.3 Epoxidation Reaction

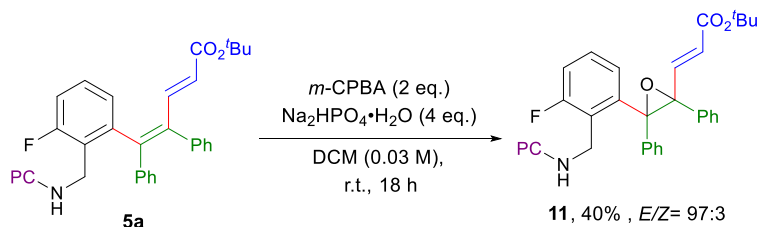

Epoxidation experiment was performed according to previous literature<sup>[9]</sup>. A solution of **5a** (53.6mg, 0.1 mmol, 1.0 equiv) in CH<sub>2</sub>Cl<sub>2</sub> (3.3 mL, 0.03 M) at 0 °C was added *m*-CPBA (49.3 mg, 0.2 mmol, 2.0 equiv, 30% water) and Na<sub>2</sub>HPO<sub>4</sub>·2H<sub>2</sub>O (71.2 mg, 0.4 mmol, 4.0 equiv). The mixture was stirred for 18 h at room temperature. After the reaction was completed (monitored by TLC), the mixture was extracted with CH<sub>2</sub>Cl<sub>2</sub> (30 mL) for three times. The organic layers were combined and washed with Na<sub>2</sub>SO<sub>4</sub> (20 mL, 10% aq.), NaHCO<sub>3</sub> (20 mL, sat. aq) and NaCl (20 mL, sat. aq), dried over Na<sub>2</sub>SO<sub>4</sub> and concentrated in vacuo. The residue was purified by column chromatography on silica gel (petroleum ether/EtOAc) to give epoxy compound **11** as

a colorless liquid (22.0 mg, 40% yield, *E/Z* = 97:3).

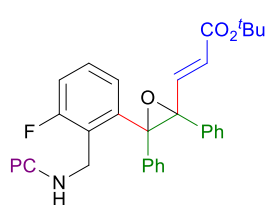

**Tert-butyl(*E*)-3-(((2*R*,3*R*)-3-(3-fluoro-2-((pyrazine-2-carboxamido) methyl) phenyl)-2,3-diphenyloxiran-2-yl)acrylate (**11**)** According to previous literature reports, **11** was obtained as a colorless liquid (22.0 mg, 40 % yield, *E/Z* = 97:3). **<sup>1</sup>H**

**NMR** (500 MHz, CDCl<sub>3</sub>) δ 8.76 (s, 1H), 8.26 (d, *J* = 4.0 Hz, 1H), 8.11 (dd, *J* = 4.0, 1.5 Hz, 1H), 7.54 (s, 1H), 7.46 – 7.40 (m, 1H), 7.32 – 7.23 (m, 4H), 7.21 – 7.13 (m, 4H), 7.03 – 6.95 (m, 3H), 6.93 – 6.87 (m, 2H), 5.49 (d, *J* = 15.5 Hz, 1H), 4.68 – 4.49 (m, 2H), 1.34 (s, 9H). **<sup>13</sup>C NMR** (125 MHz, CDCl<sub>3</sub>) δ 166.31, 162.16 (d, *J*<sub>CF</sub> = 248.8 Hz), 160.06, 149.35, 145.43, 144.98 (d, *J*<sub>CF</sub> = 2.1 Hz), 143.80, 143.30 (d, *J*<sub>CF</sub> = 3.6 Hz), 140.00, 139.30, 137.93, 135.27, 133.57, 130.81, 130.34, 129.81, 128.45, 127.77, 127.45 (d, *J*<sub>CF</sub> = 11.1 Hz), 127.28 (d, *J*<sub>CF</sub> = 3.0 Hz), 124.58, 122.98 (d, *J*<sub>CF</sub> = 15.1 Hz), 115.65 (d, *J*<sub>CF</sub> = 22.3 Hz), 80.33, 53.47, 35.21 (d, *J*<sub>CF</sub> = 4.1 Hz), 29.72, 28.02. **<sup>19</sup>F NMR** (471 MHz, CDCl<sub>3</sub>) δ -115.69. **HRMS (ESI)** calcd for C<sub>33</sub>H<sub>30</sub>FN<sub>3</sub>O<sub>4</sub>Na [M+Na]<sup>+</sup>: 574.2113, found: 574.2118.

## 6.4 Desilylated Reaction

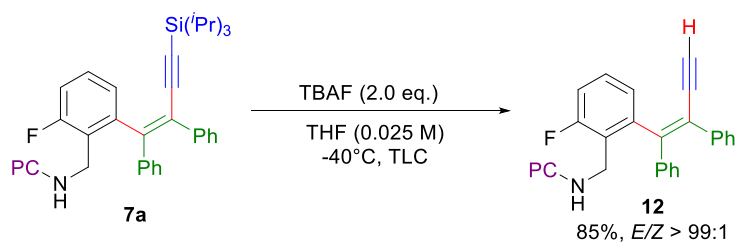

To an oven-dried 25 mL flask was added **7a** (28.9mg, 0.05 mmol), a solution of TBAF (2.0 eq.) in THF (0.025M). The reaction was stirred at -40°C under Ar. After the reaction was completed (monitored by TLC), the reaction was quenched by saturated NaHCO<sub>3</sub> solution (4 mL), extracted by DCM (3 × 10 mL). The combined organic layers were dried over Na<sub>2</sub>SO<sub>4</sub>, filtered, concentrated. The residue was purified by column chromatography on silica gel (PE/EA) to afford the product **12** as colorless liquid (18.4 mg, 85% yield, *E/Z* > 99:1).

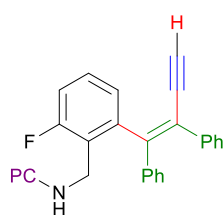

**(E)-N-(2-(1,2-diphenyl but-1-en-3-yn-1-yl)-6-fluorobenzyl) pyrazine-2-carboxamide (12)** According to previous literature reports, **12** was obtained as a colorless liquid (18.4 mg, 85 % yield,  $E/Z > 99:1$ ).  **$^1\text{H NMR}$**  (500 MHz,  $\text{CDCl}_3$ )  $\delta$  9.38 (d,  $J = 1.2$  Hz, 1H), 8.70 (d,  $J = 2.4$  Hz, 1H), 8.48 – 8.40 (m, 1H), 7.86 (s, 1H), 7.40 – 7.34 (m, 1H), 7.34 – 7.29 (m, 2H), 7.23 – 7.18 (m, 4H), 7.11 (t,  $J = 9.0$  Hz, 1H), 7.08 – 7.03 (m, 3H), 7.01 – 6.95 (m, 2H), 4.91 (dd,  $J = 14.0, 5.9$  Hz, 1H), 4.52 (dd,  $J = 13.8, 3.7$  Hz, 1H), 3.06 (s, 1H).  **$^{13}\text{C NMR}$**  (125 MHz,  $\text{CDCl}_3$ )  $\delta$  162.20, 161.98 (d,  $J_{CF} = 248.0$  Hz), 147.37 (d,  $J_{CF} = 2.3$  Hz), 147.02, 144.92 (d,  $J_{CF} = 3.8$  Hz), 144.57, 144.43, 142.30, 139.08, 137.77, 130.19, 129.77, 129.45 (d,  $J_{CF} = 9.2$  Hz), 128.21, 128.08, 127.79, 126.17 (d,  $J_{CF} = 3.2$  Hz), 123.46, 123.11, 122.99, 115.16 (d,  $J_{CF} = 22.3$  Hz), 84.78, 83.25, 35.28 (d,  $J_{CF} = 4.2$  Hz).  **$^{19}\text{F NMR}$**  (471 MHz,  $\text{CDCl}_3$ )  $\delta$  -115.72. **HRMS (ESI)** calcd for  $\text{C}_{28}\text{H}_{20}\text{FN}_3\text{ONa}$   $[\text{M}+\text{Na}]^+$ : 456.1488, found: 456.1489.

## 7. Photophysical properties of products

After developing a method for the synthesis of tetra-substituted olefins, we investigated their AIE performance, the corresponding results are shown in **Figure S1**. The photophysical properties of representative compounds are summarized in **Table S1** and the corresponding spectra are given.

**Supplementary Table 1.** Photophysical data of representative AIE-gens<sup>a</sup>

| Compound                                                                                 | Solution [nm]   |                |                  | Photo<br>imagesc                                                                      |
|------------------------------------------------------------------------------------------|-----------------|----------------|------------------|---------------------------------------------------------------------------------------|
|                                                                                          | $\lambda_{abs}$ | $\lambda_{em}$ | Stoke's<br>shift |                                                                                       |
| 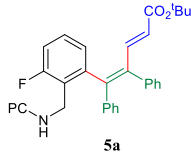<br>5a  | 319             | 449            | 130              |    |
| <br>5j  | 265             | 459            | 194              |    |
| <br>5t  | 260             | 452            | 192              |    |
| <br>5u | 260             | 434            | 174              |  |

<sup>a</sup>  $\lambda_{abs}$  and  $\lambda_{em}$  refer to optimal absorption wavelength and photoluminescence (PL) peak, respectively. <sup>b</sup> Photo images of the solid under UV light ( $\lambda_{ex} = 365$  nm).

### Fluorescence Behaviour of Compounds 5a in 1,4-dioxane/H<sub>2</sub>O Mixture

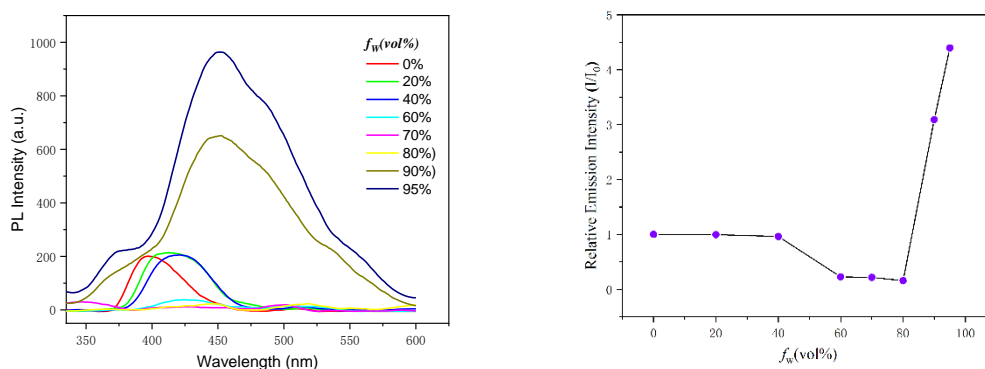

**Supplementary Figure S1.** (a) Emission spectra and (b) emission profile of compound 5a in 1,4-dioxane /H<sub>2</sub>O mixture with increasing  $f_w$  to 95% ( $c = 150$   $\mu$ M,  $\lambda_{ex} = 319$  nm).



## 8. References

- [1] Chreib, B. S.; Carreira, E. M. *J. Am. Chem. Soc.* **2019**, *141*, 8758–8763.
- [2] Martínez, A. M.; Echavarren, J.; Alonso, I.; Rodríguez, N.; Arrayás, R. G.; Carretero, J. C. *Chem. Sci.* **2015**, *6*, 5802–5814.
- [3] Wang, J.; Hu, D.; Sun, X.; Hong, H.; Shi, Y. *Org. Lett.* **2023**, *25*, 2006–2011.
- [4] Ye, Y.; Kevlishvili, I.; Feng, S.; Liu, P.; Buchwald, S. L. *J. Am. Chem. Soc.* **2020**, *142*, 10550–10556.
- [5] Wu, X.; Fan, J.; Fu, C.; Ma, S. *Chem. Sci.* **2019**, *10*, 6316–6321.
- [6] Moghaddam, F. M.; Farimani, M. M.; *Tetrahedron Lett.* **2010**, *51*, 540–542.
- [7] Wei, W.; Liao, L.; Qin, T.; Zhao, X. *Org. Lett.* **2019**, *21*, 7846–7850.
- [8] Shen, Cong.; Zhu, Y.; Jin, S.; Xu, K.; Luo, S.; Xu, L.; Zhong, G.; Zhong, Li.; Zhang, J. *Org. Chem. Front.* **2022**, *9*, 989–994.
- [9] Zezschwitz, P.; Voigt, K.; Lansky, A.; Noltemeyer, M.; Meijere, A. *J. Org. Chem.* **1999**, *64*, 3806–3812.

## 9. NMR Spectra

### 9.1 NMR Spectra of Substrates 1

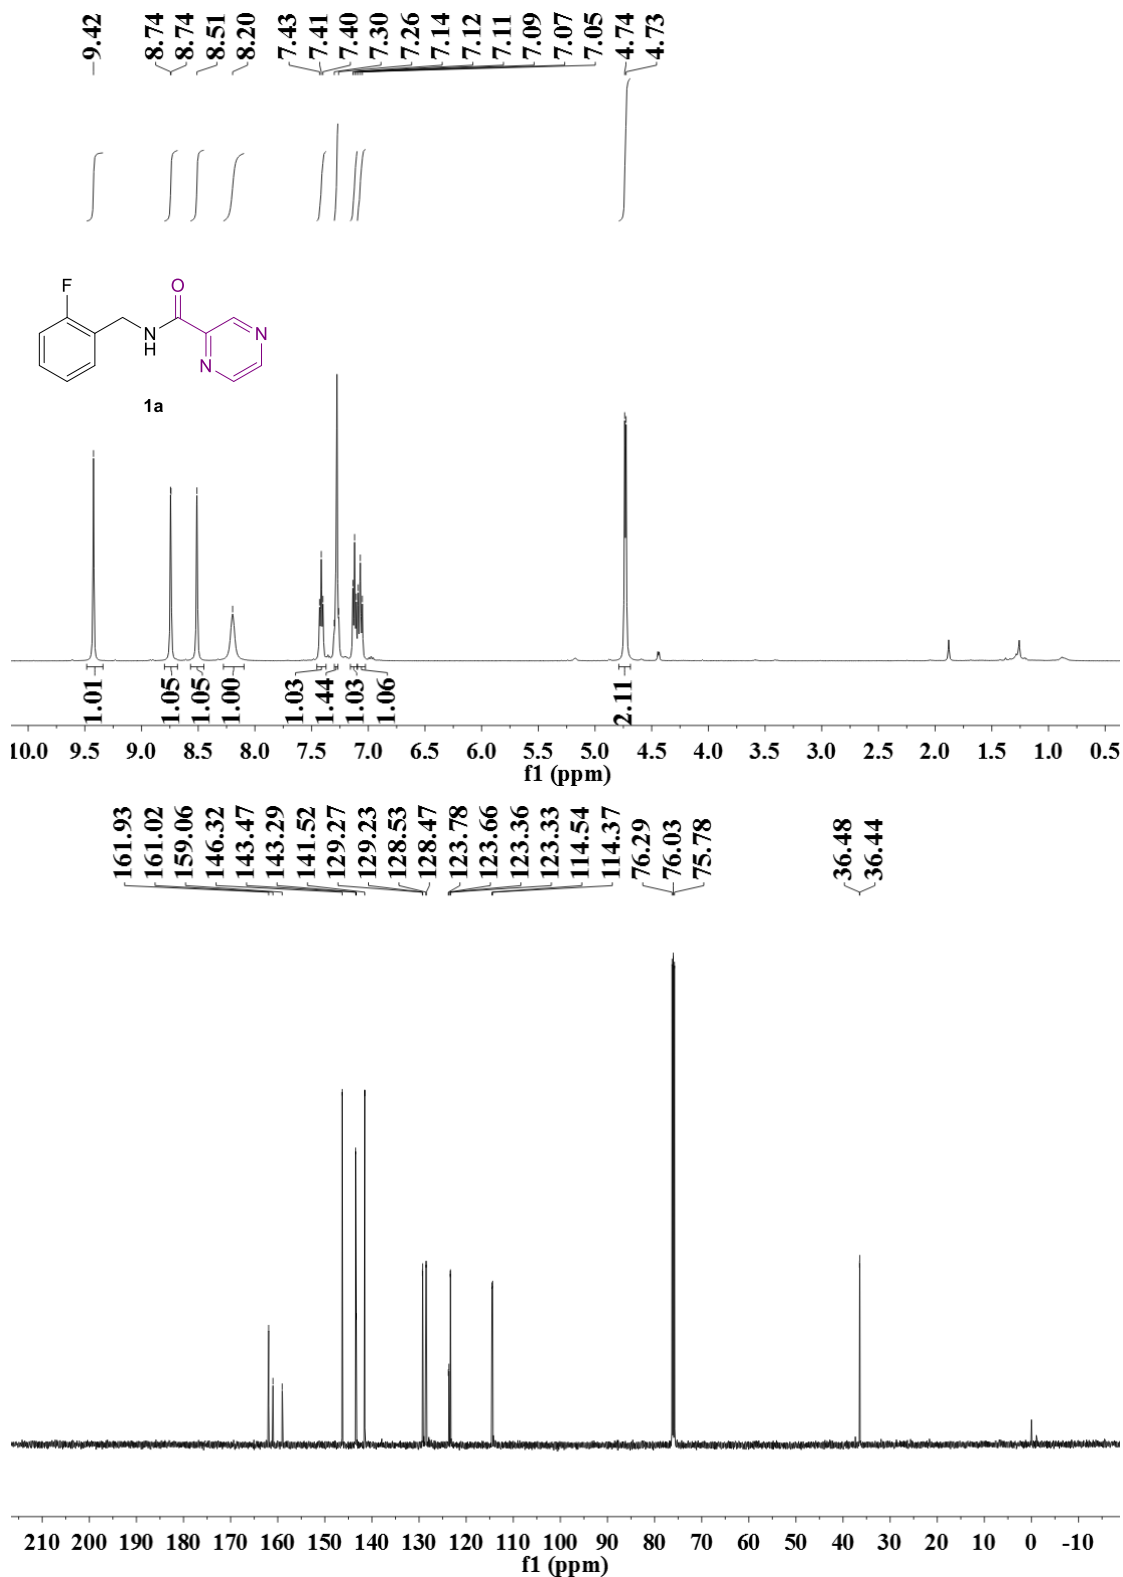

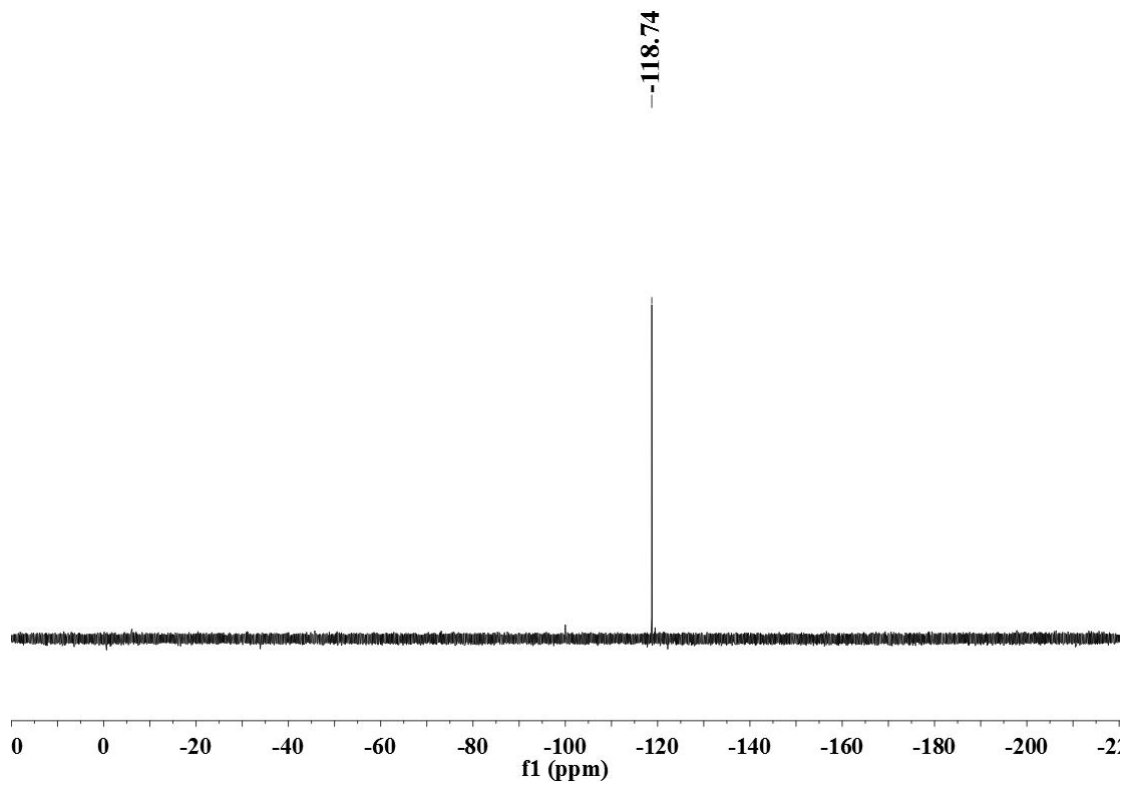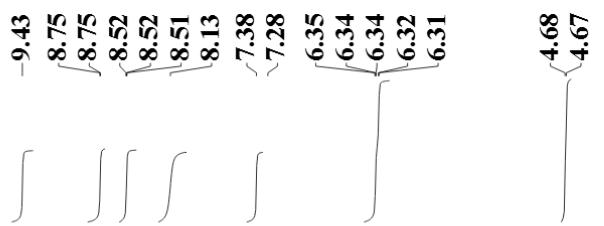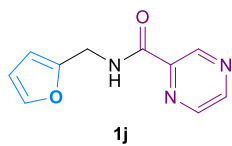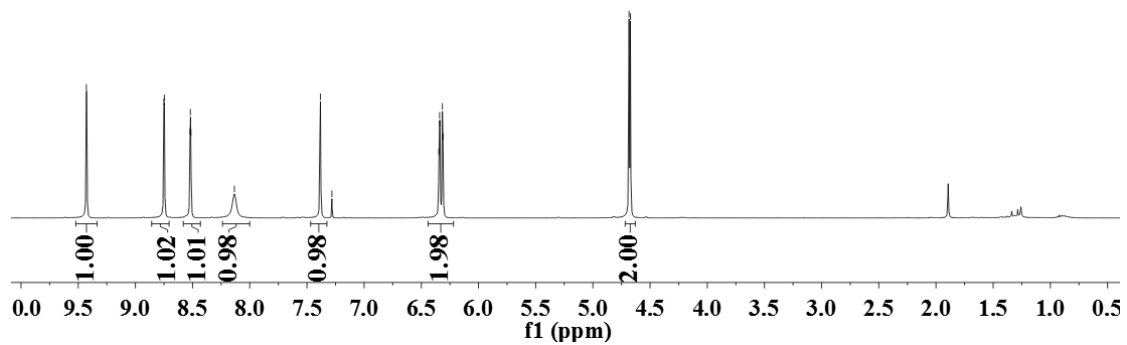

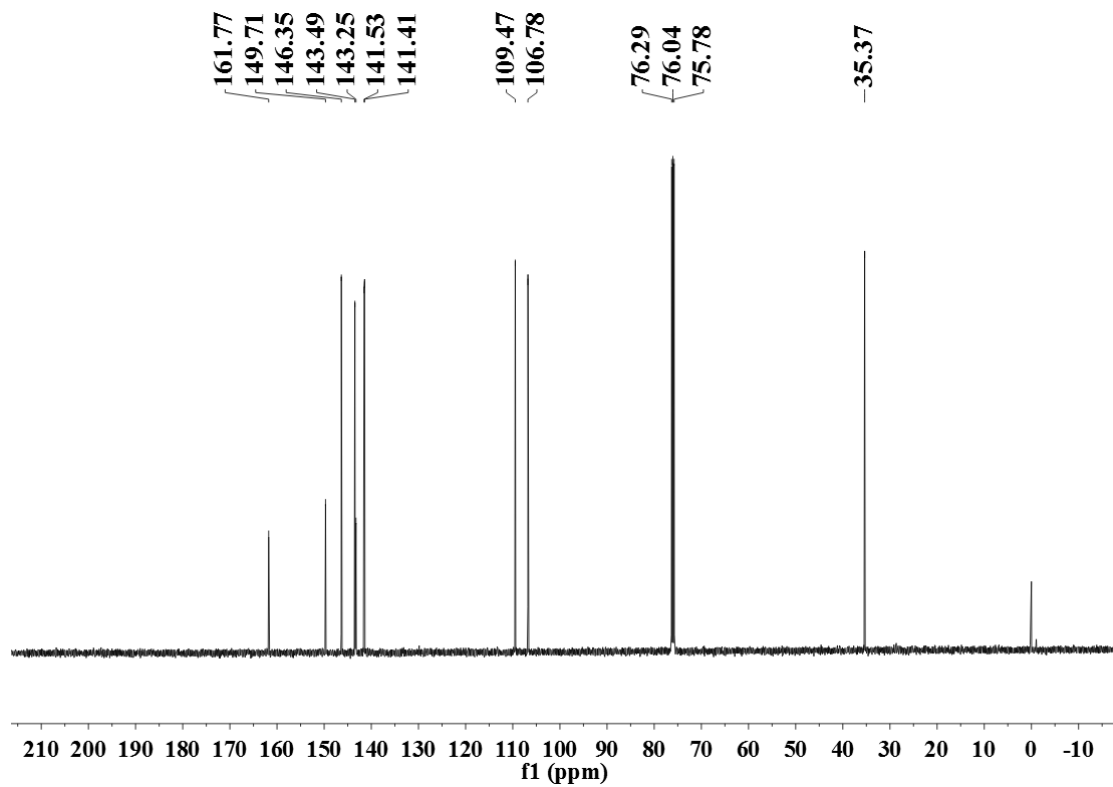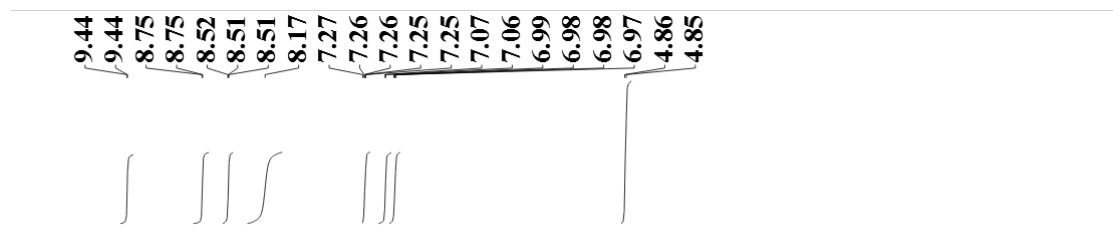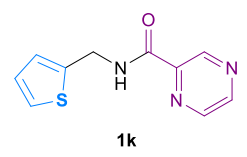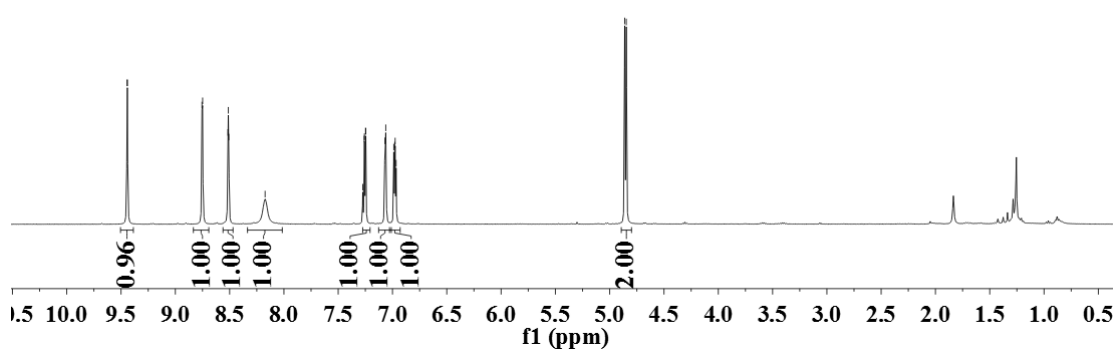

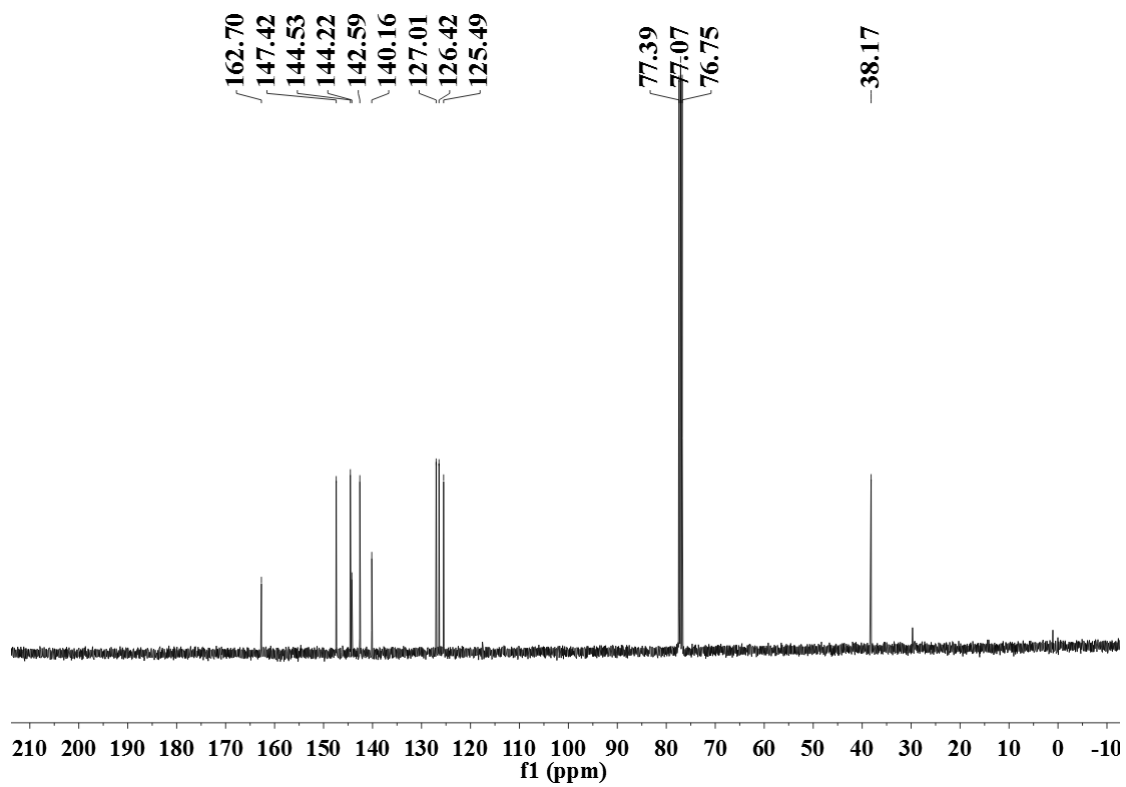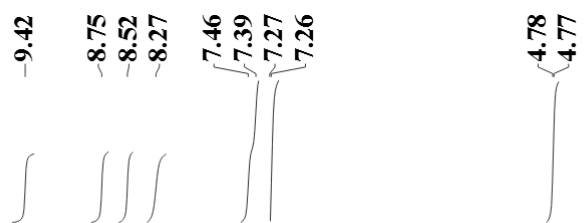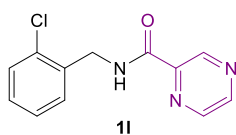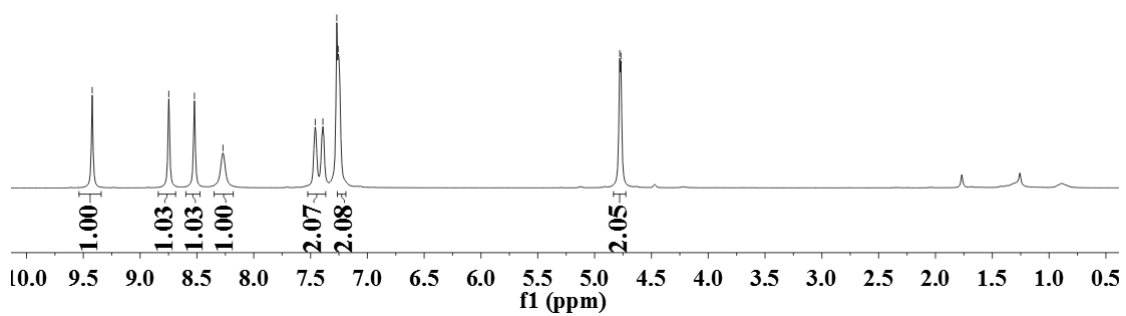

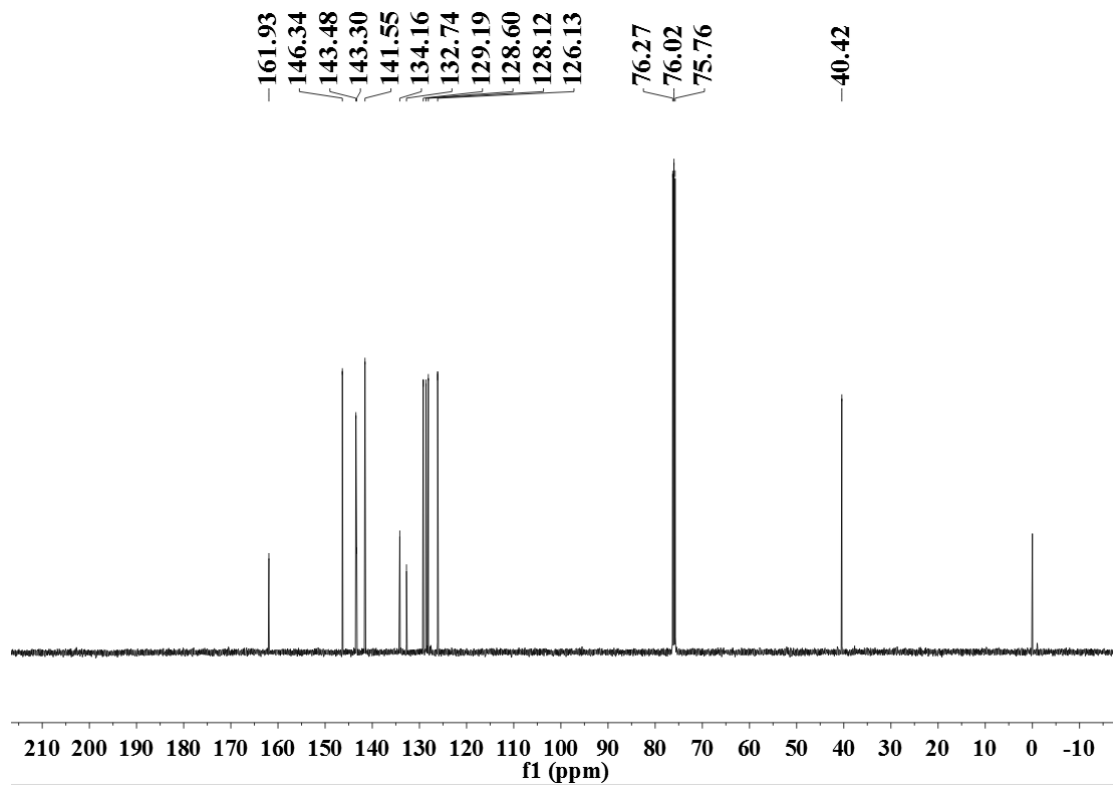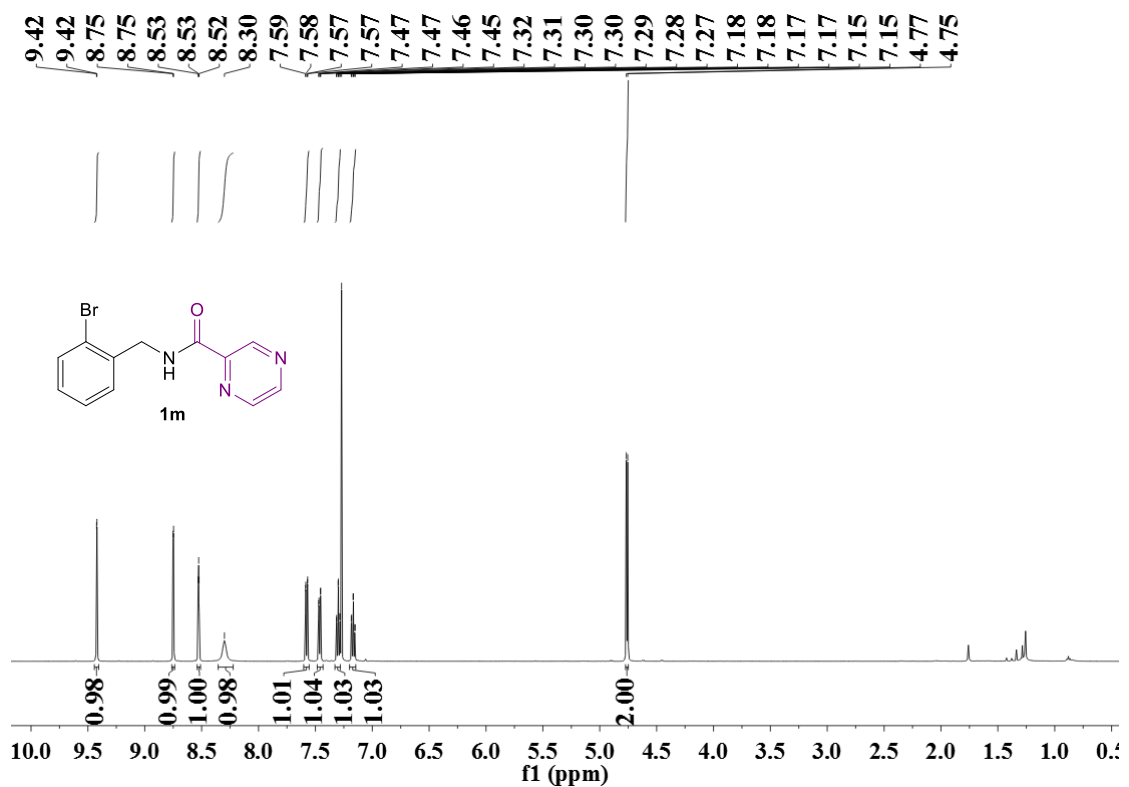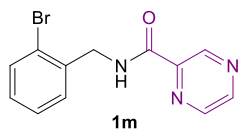

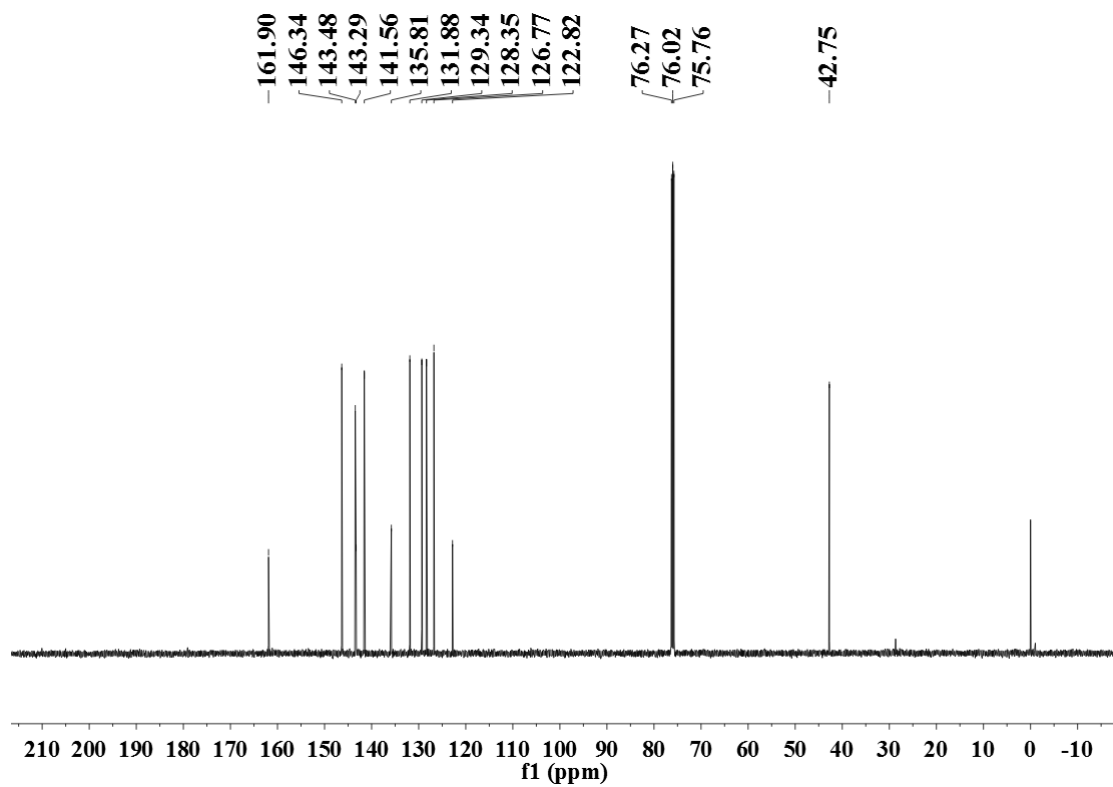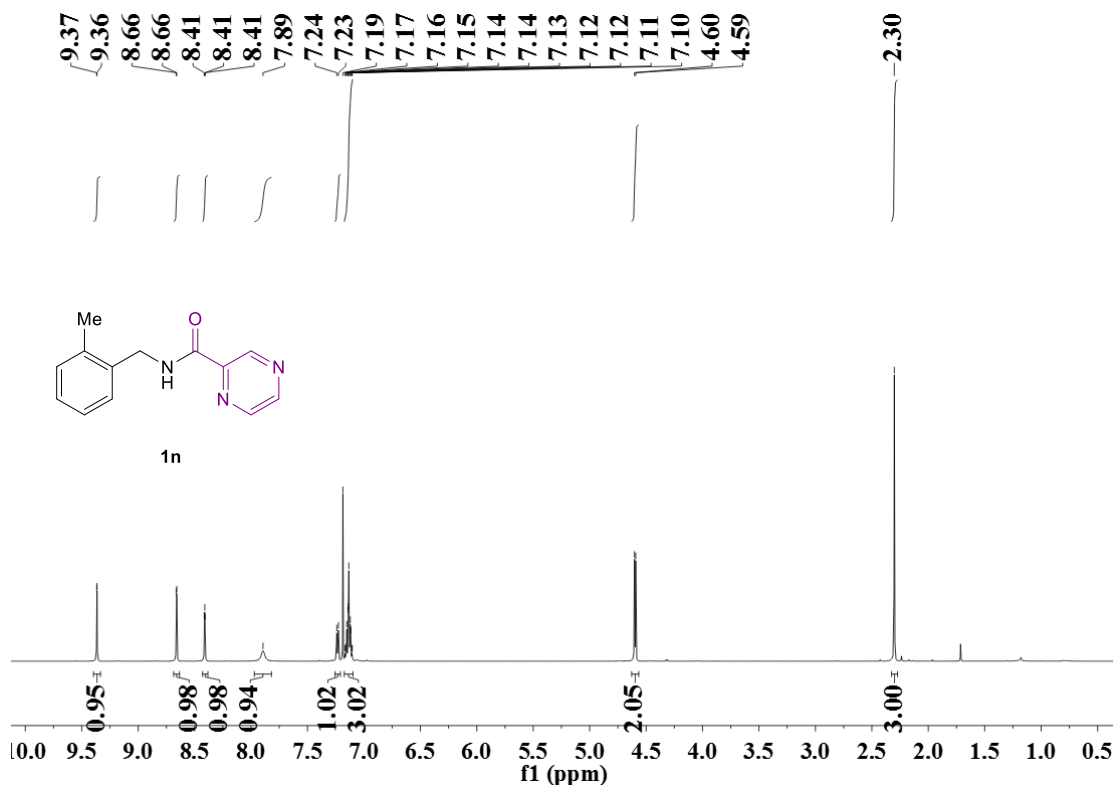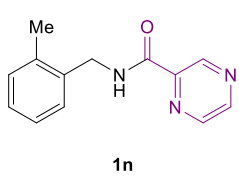





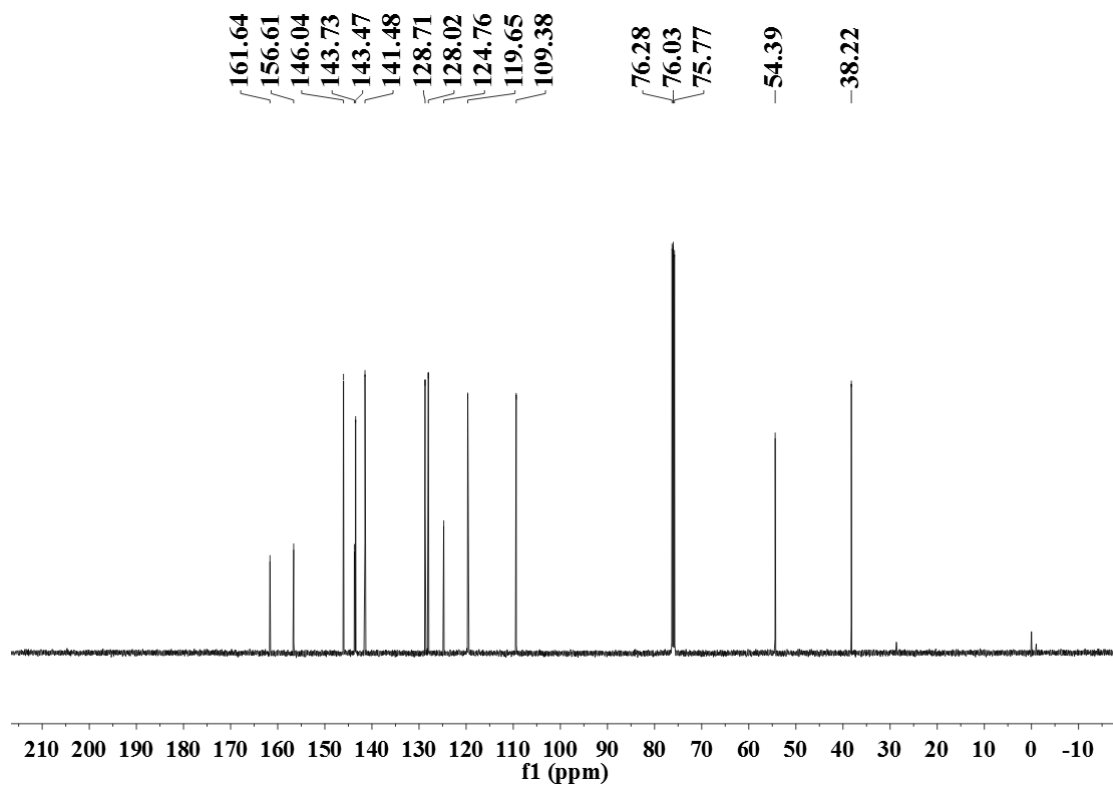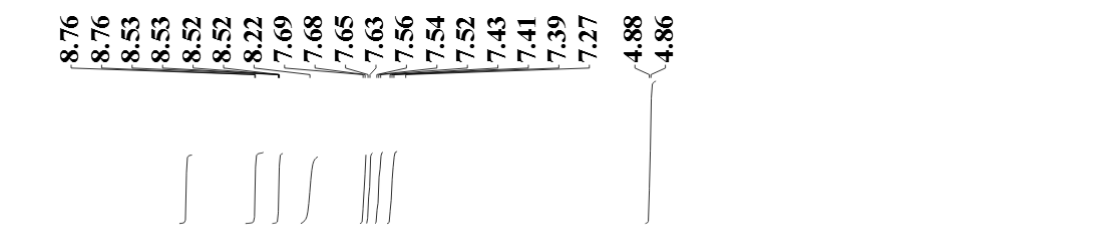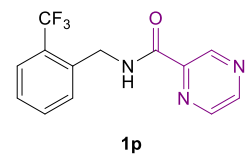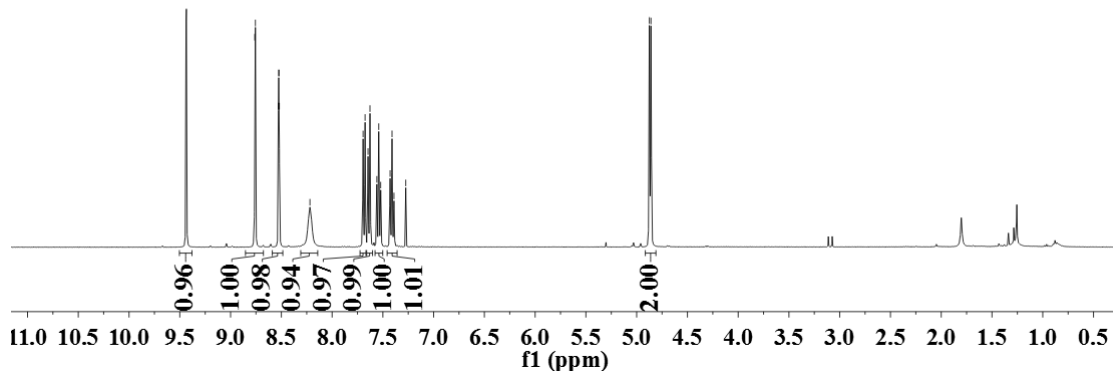

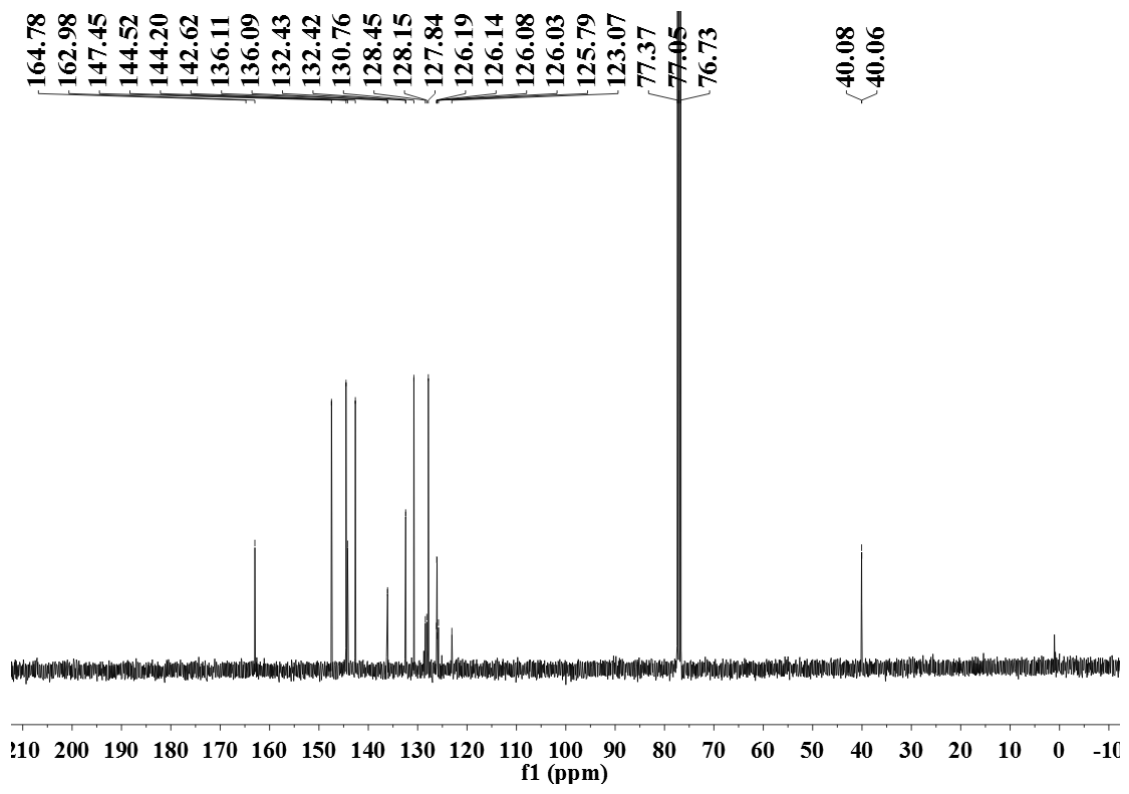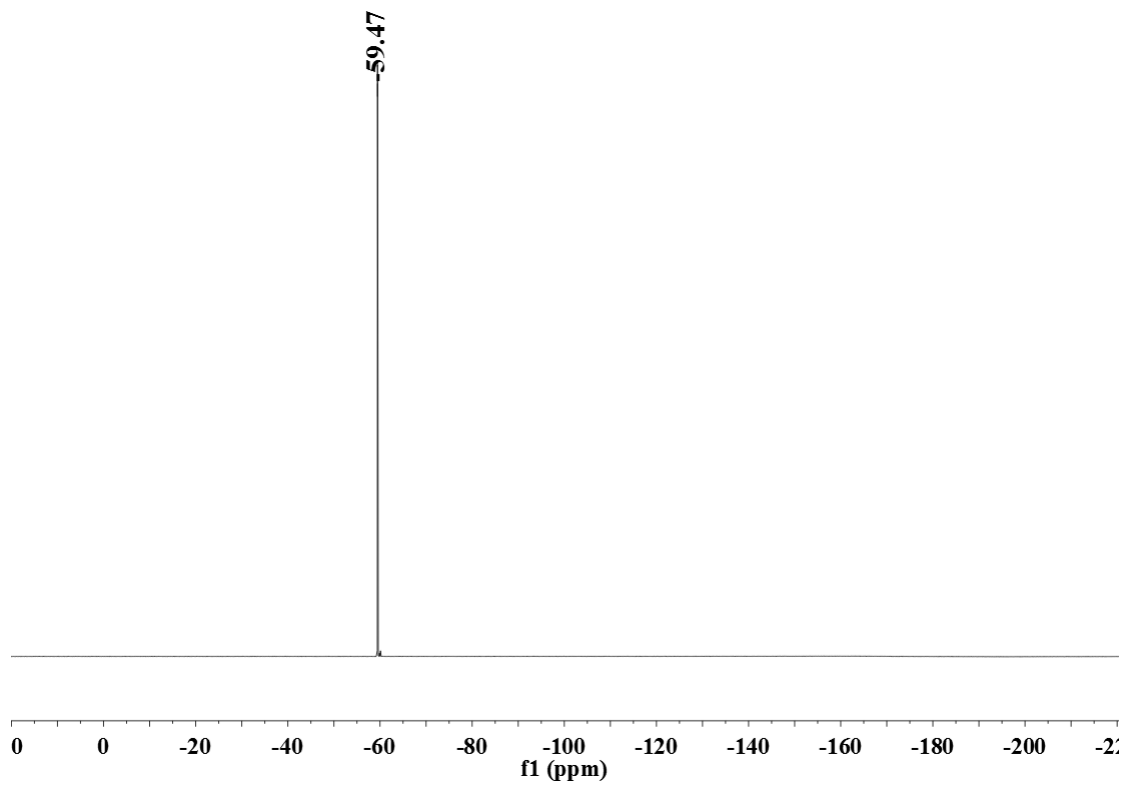

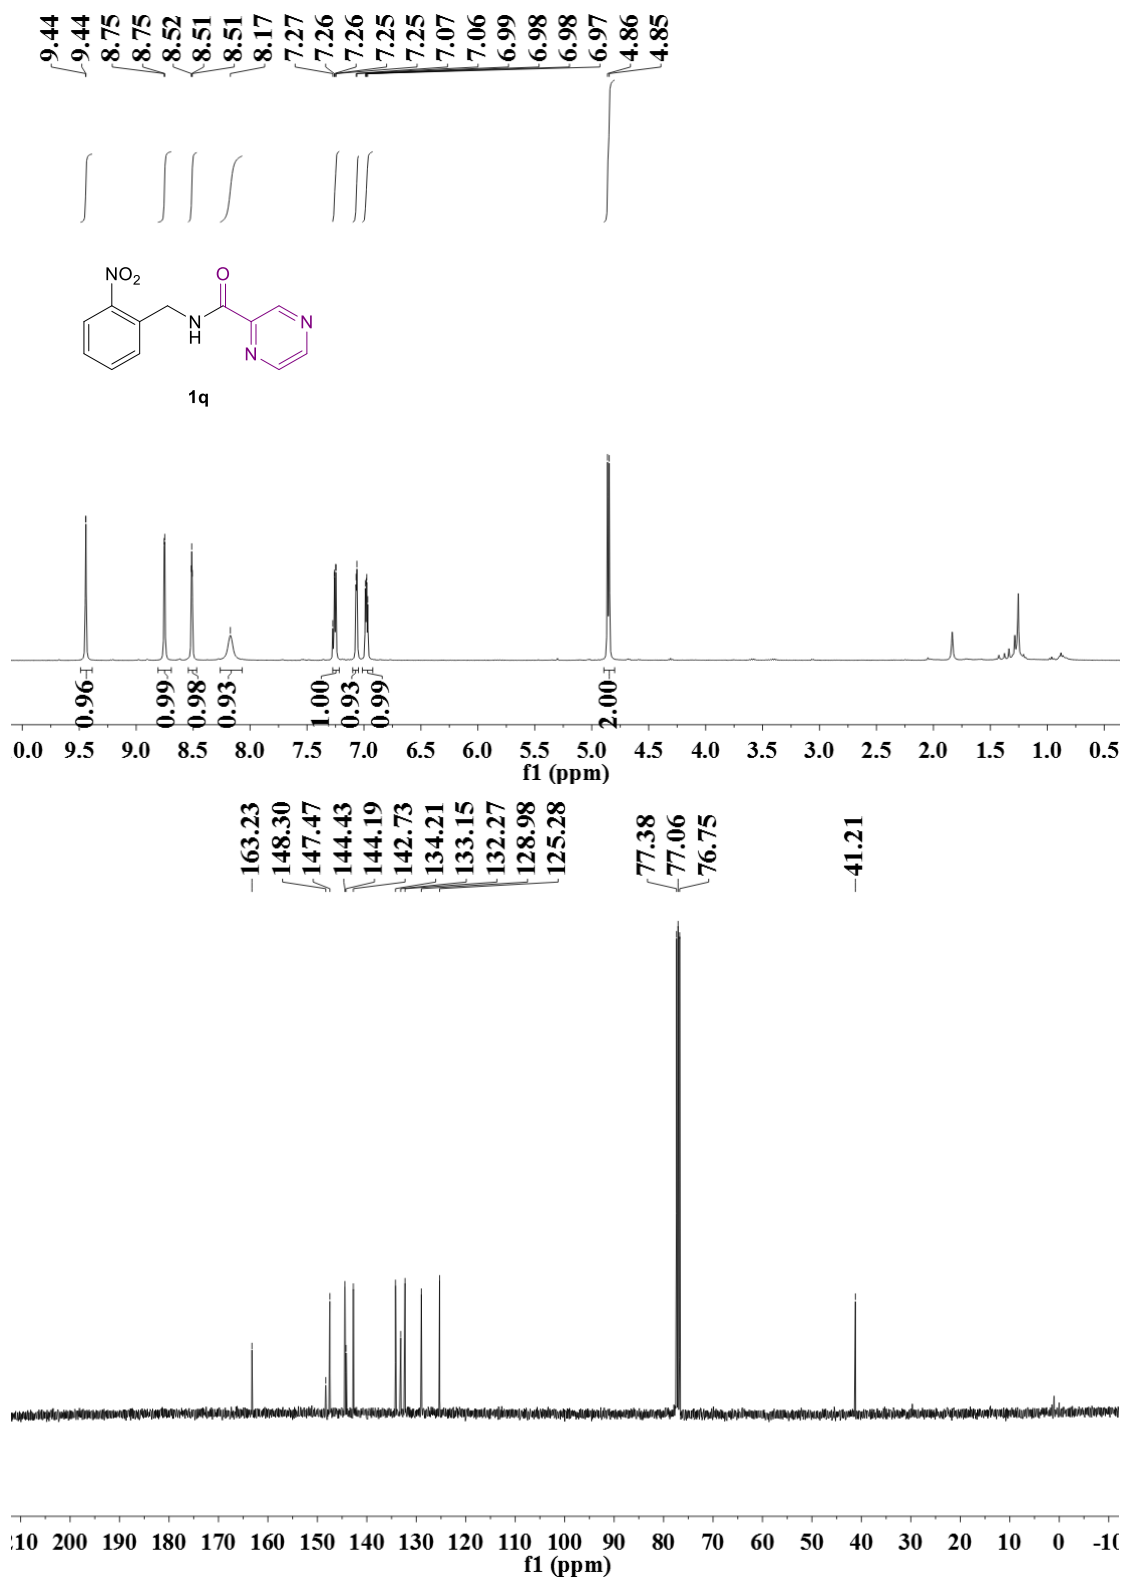

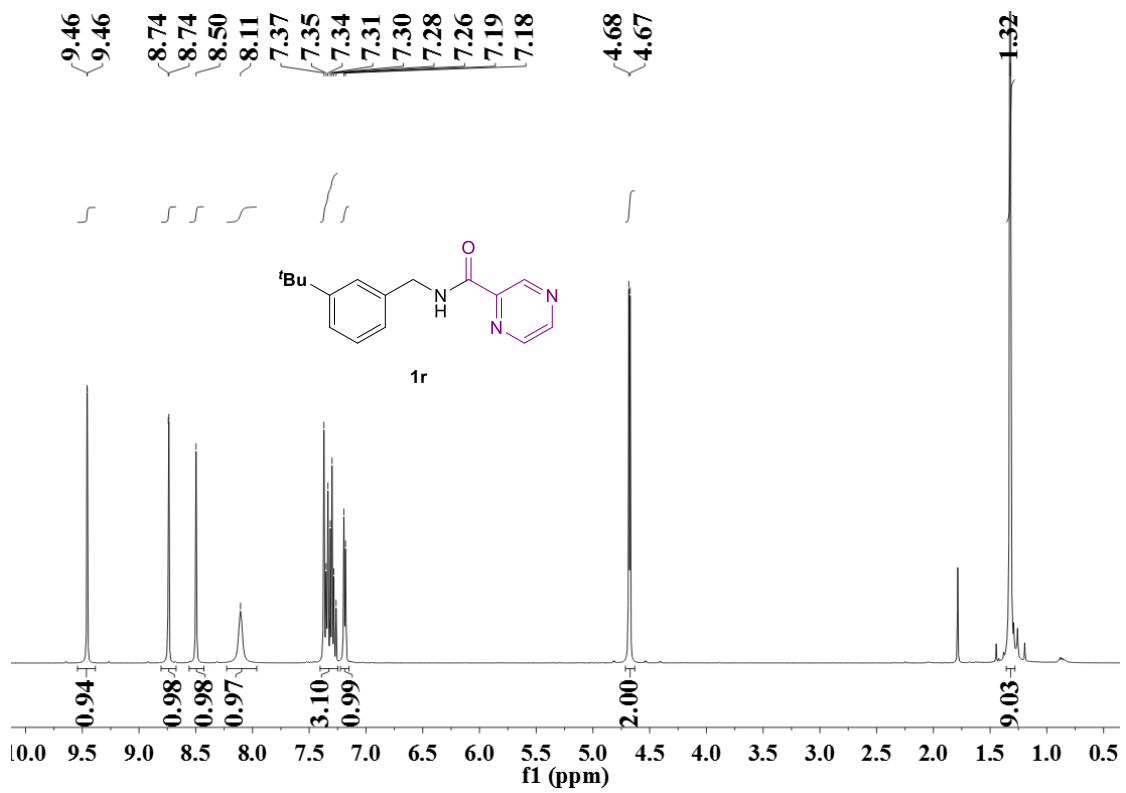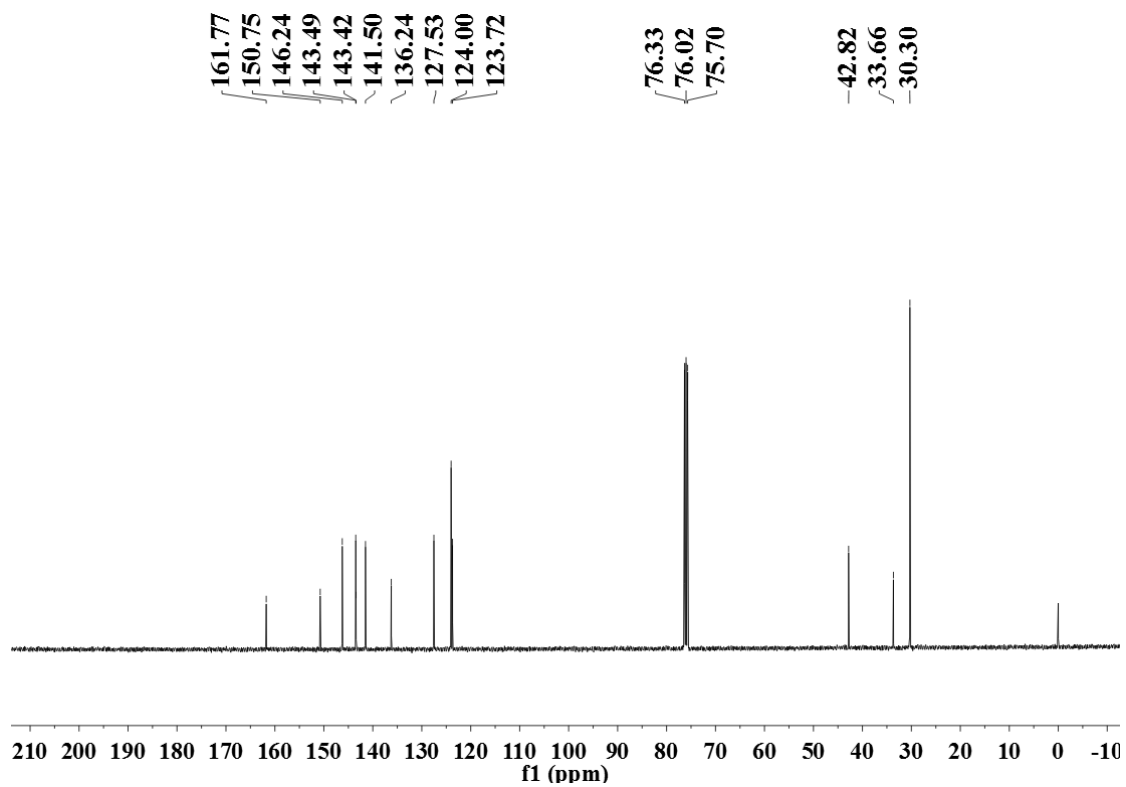

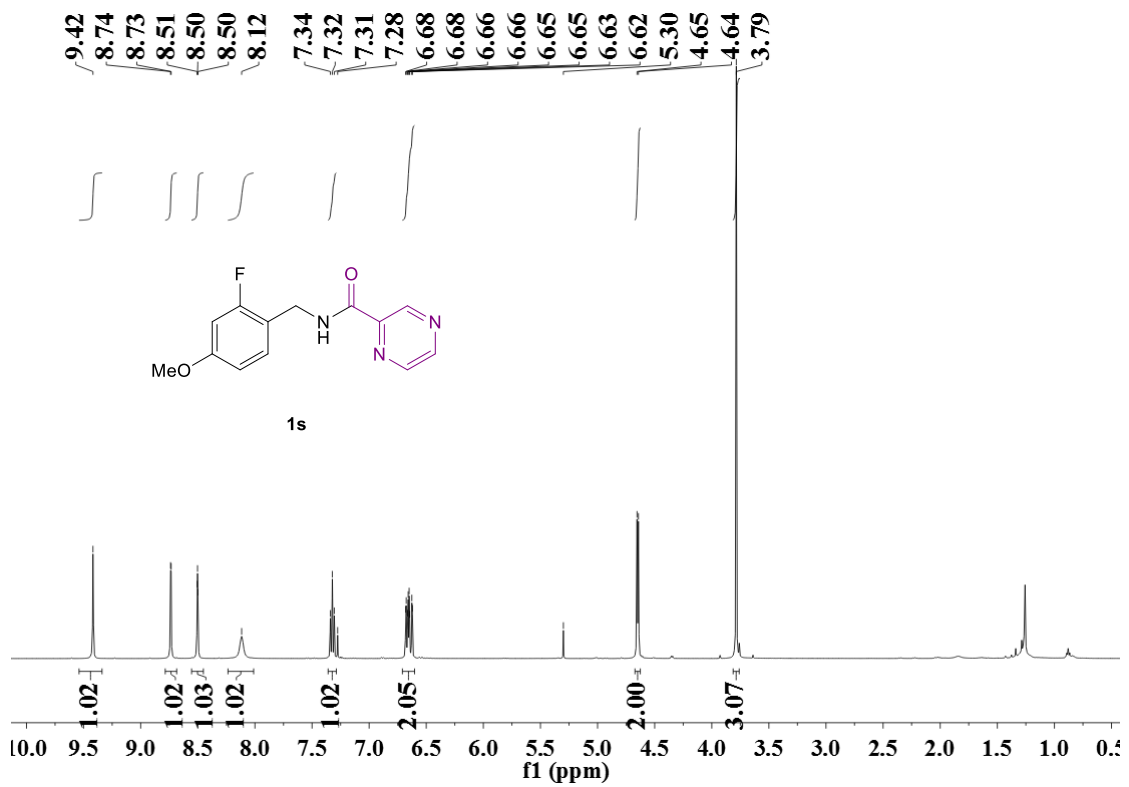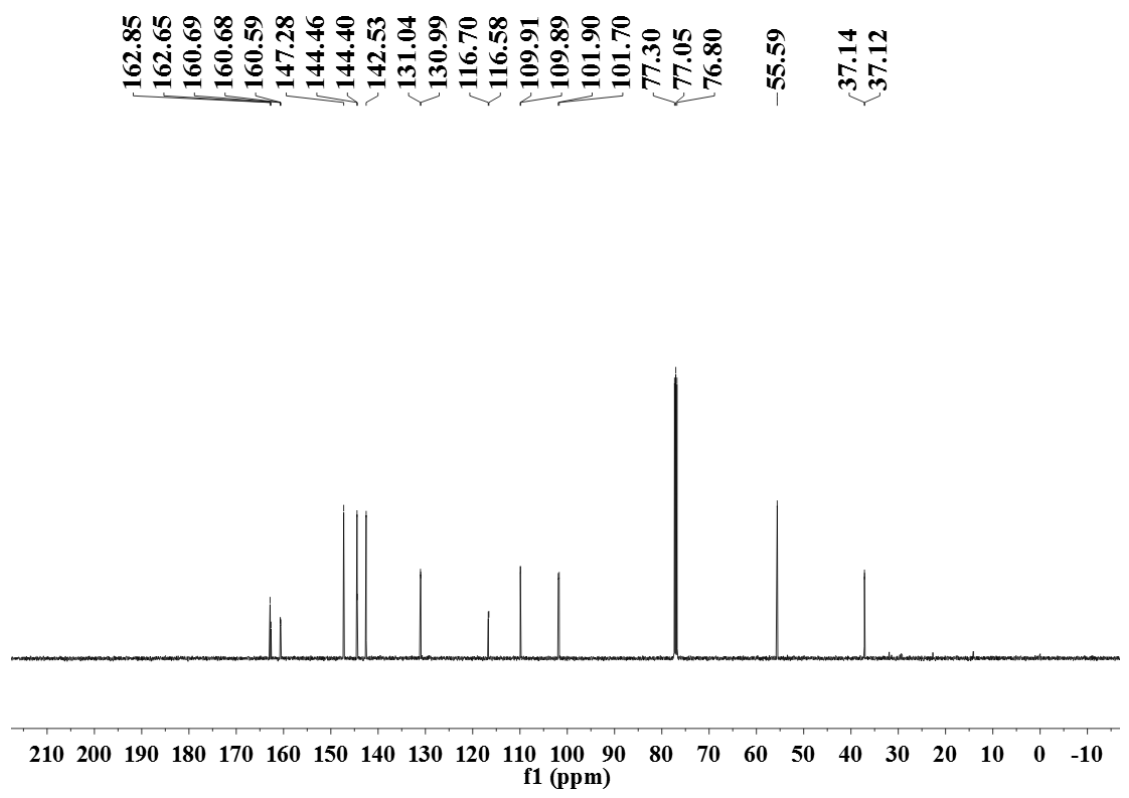

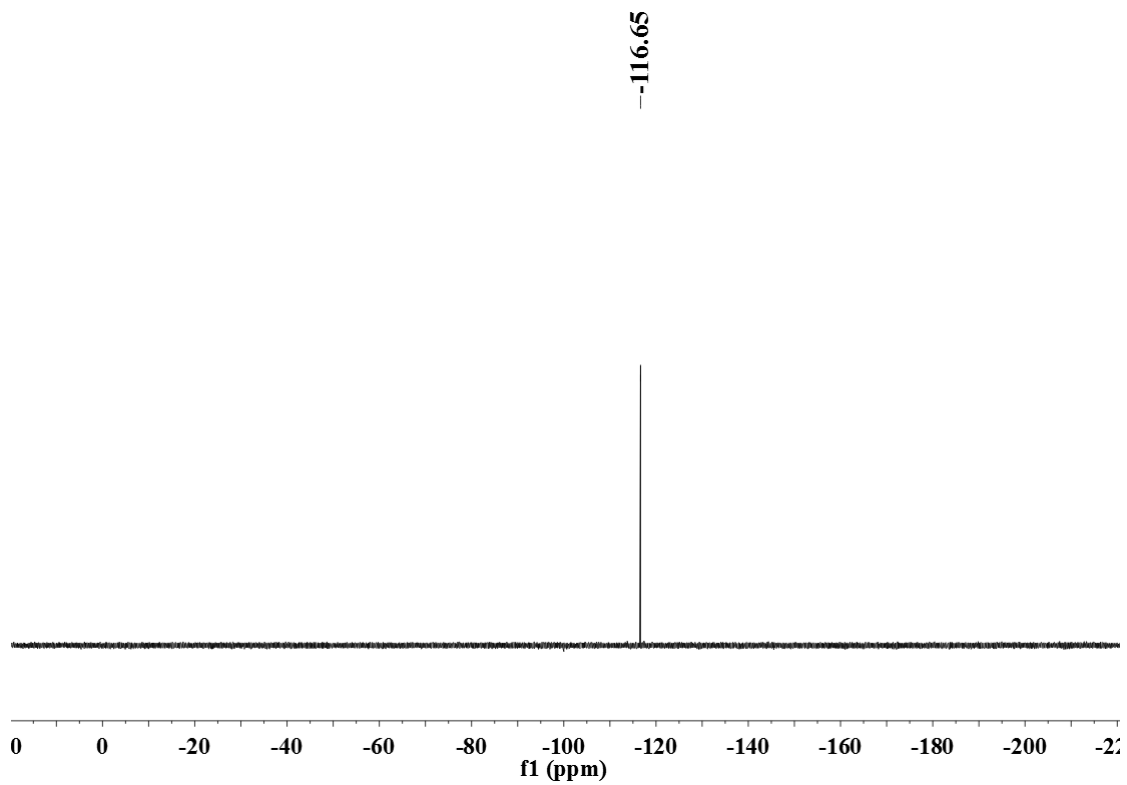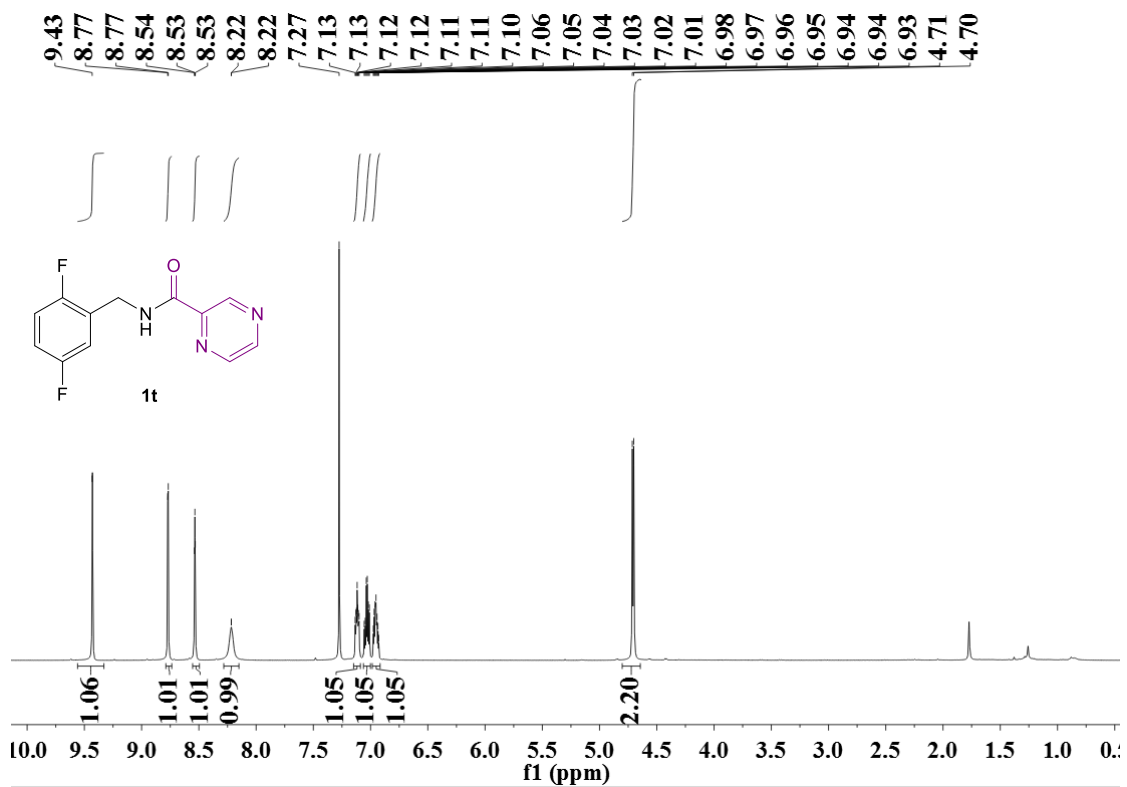

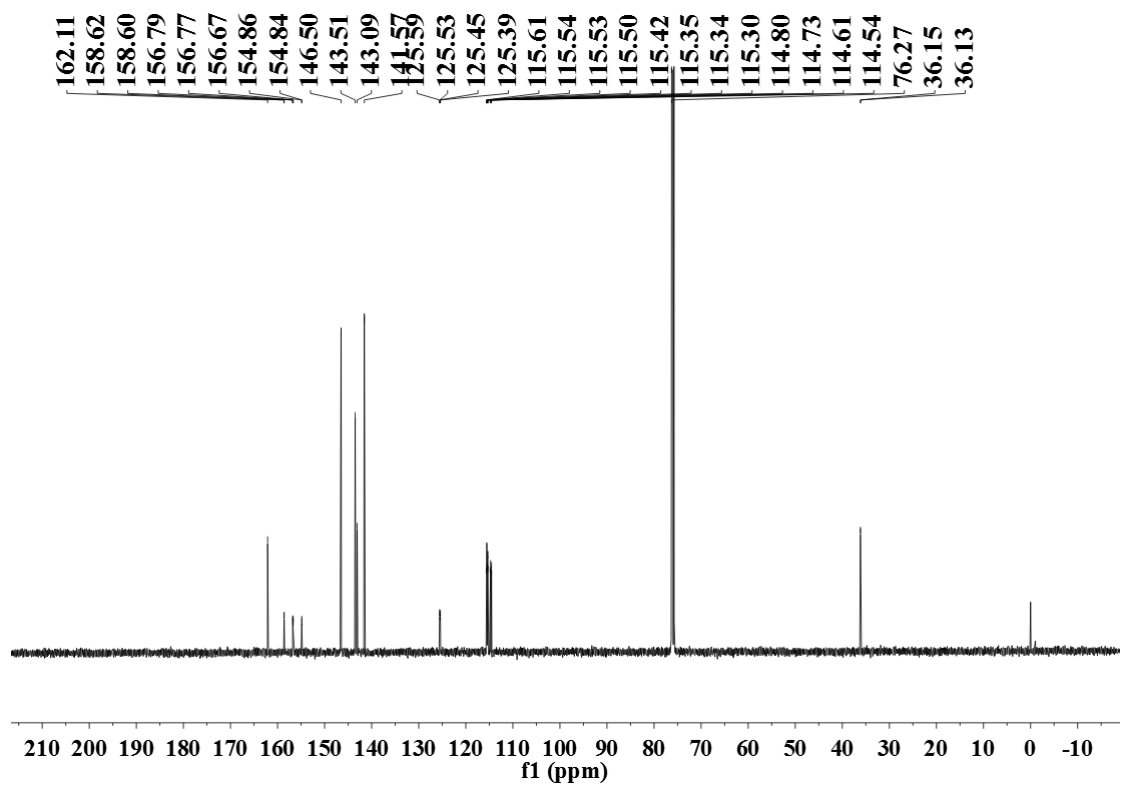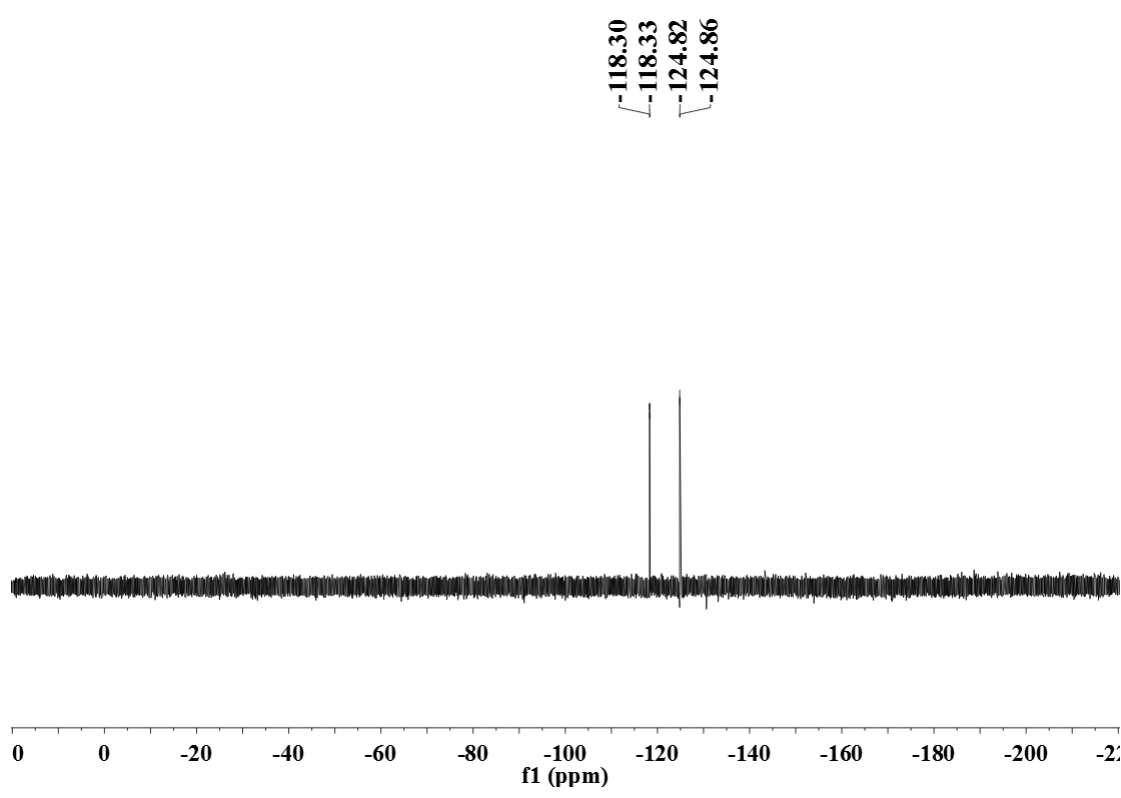

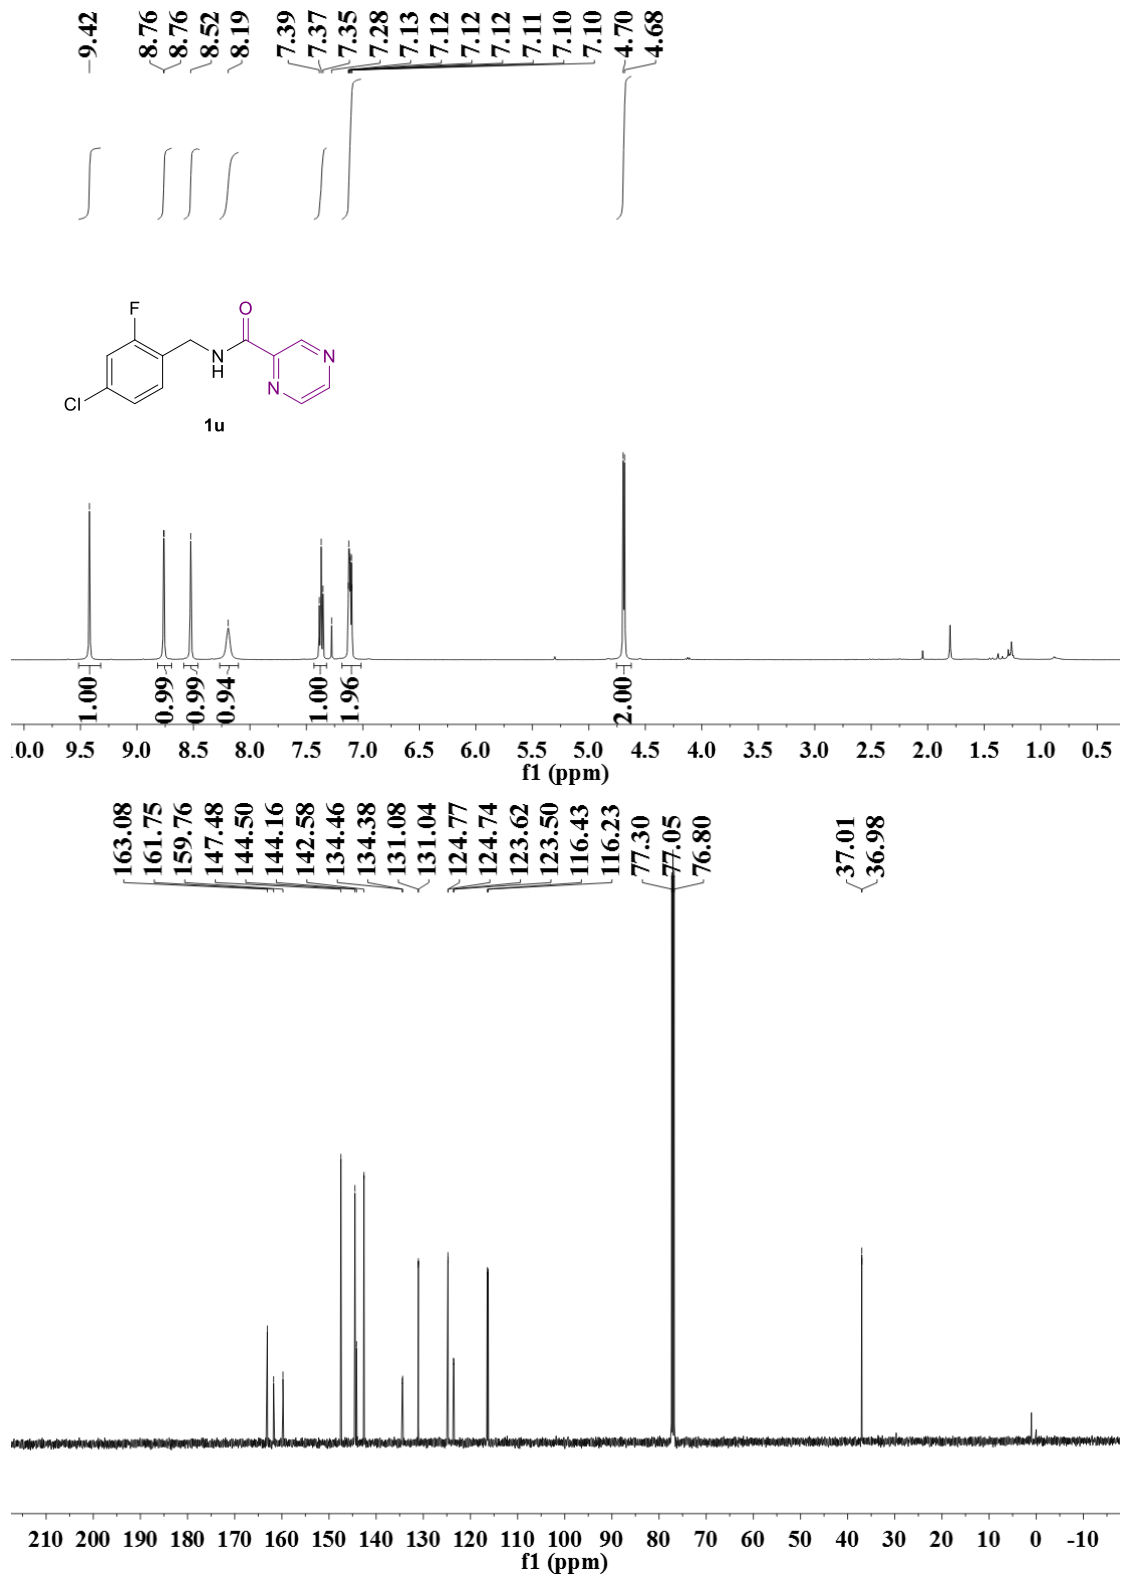



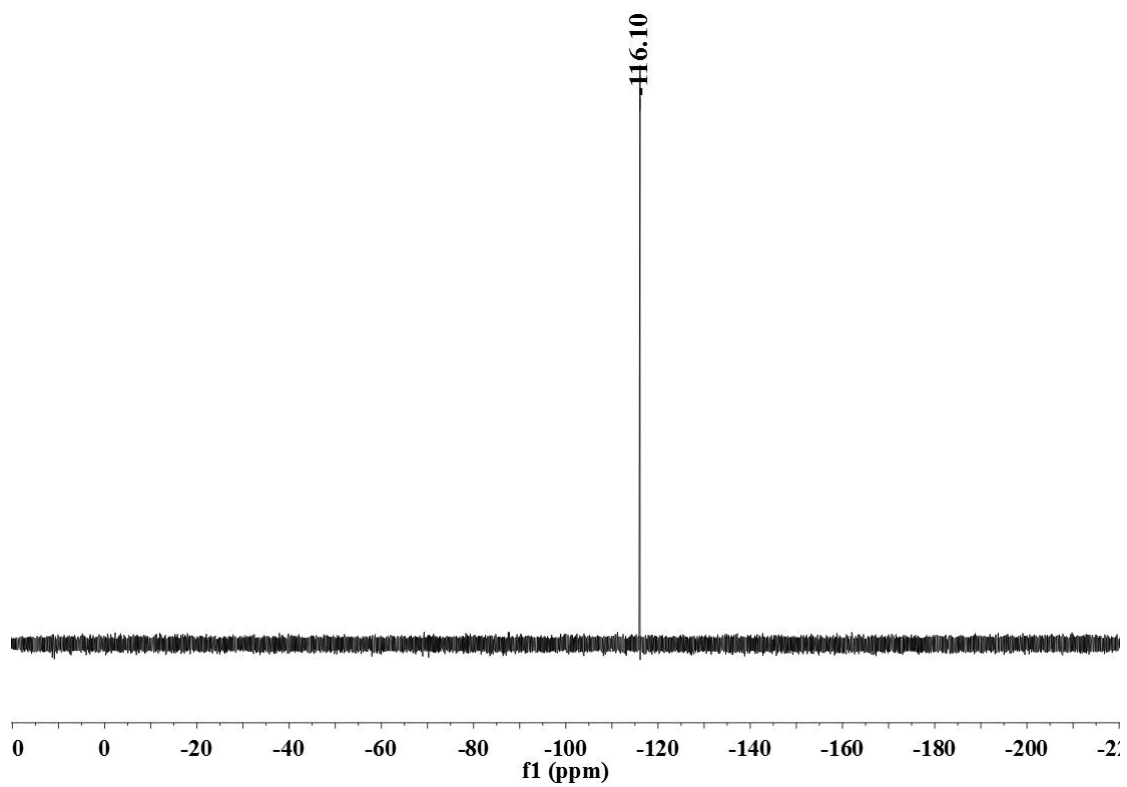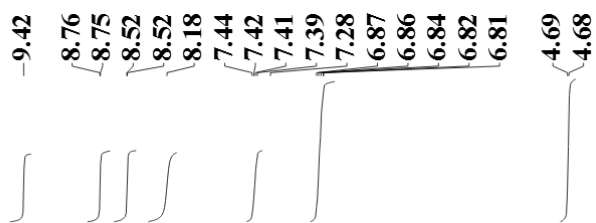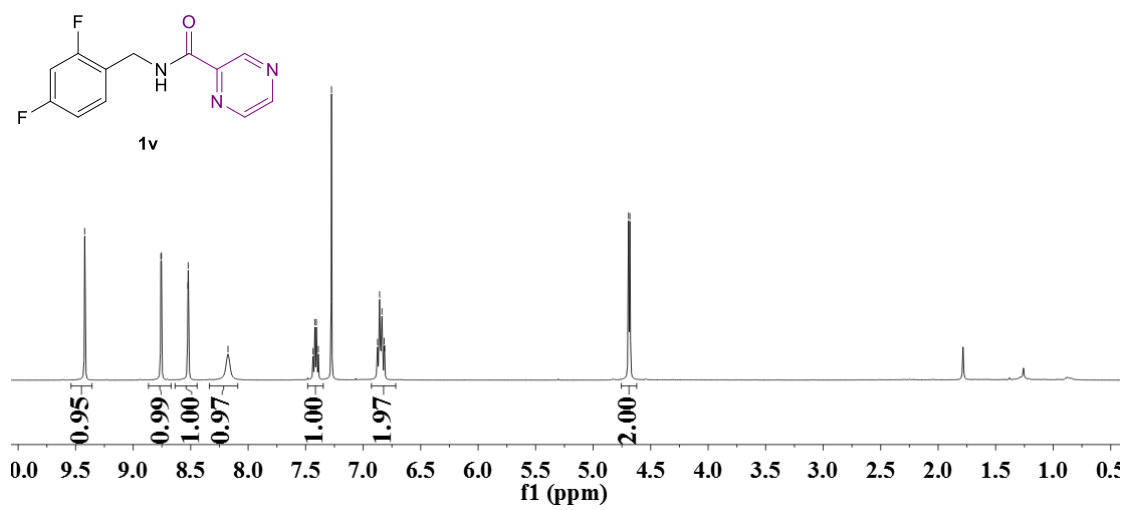

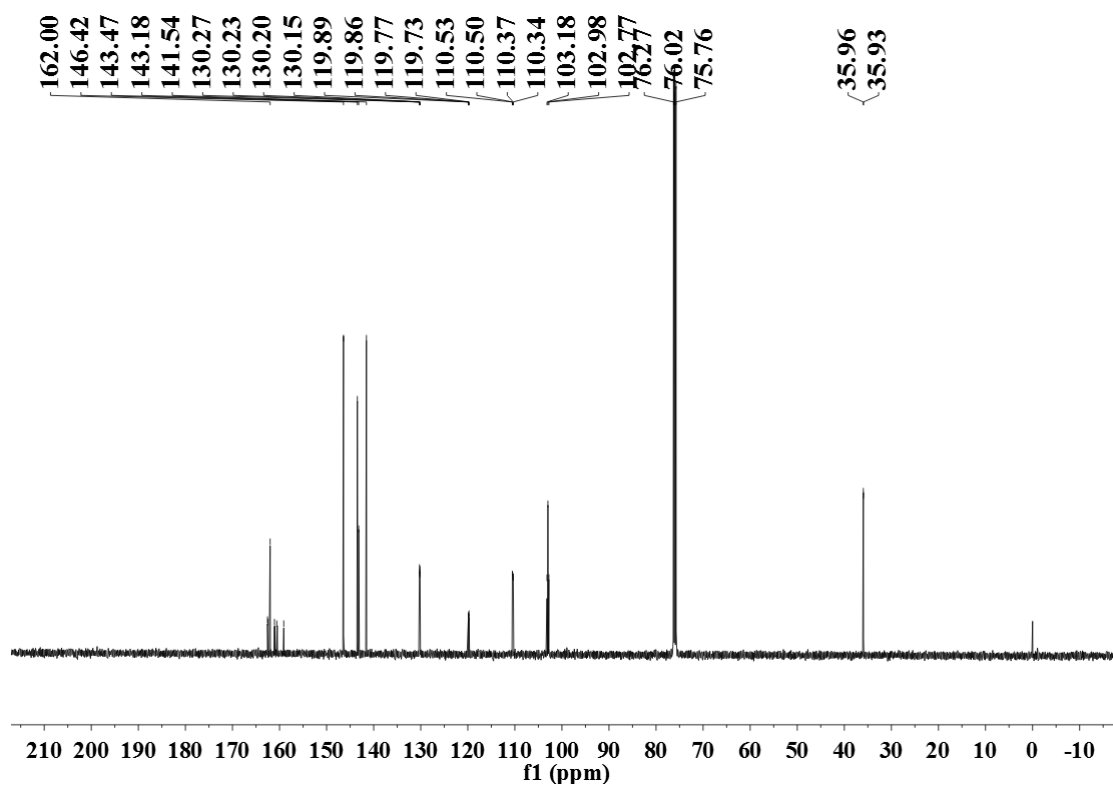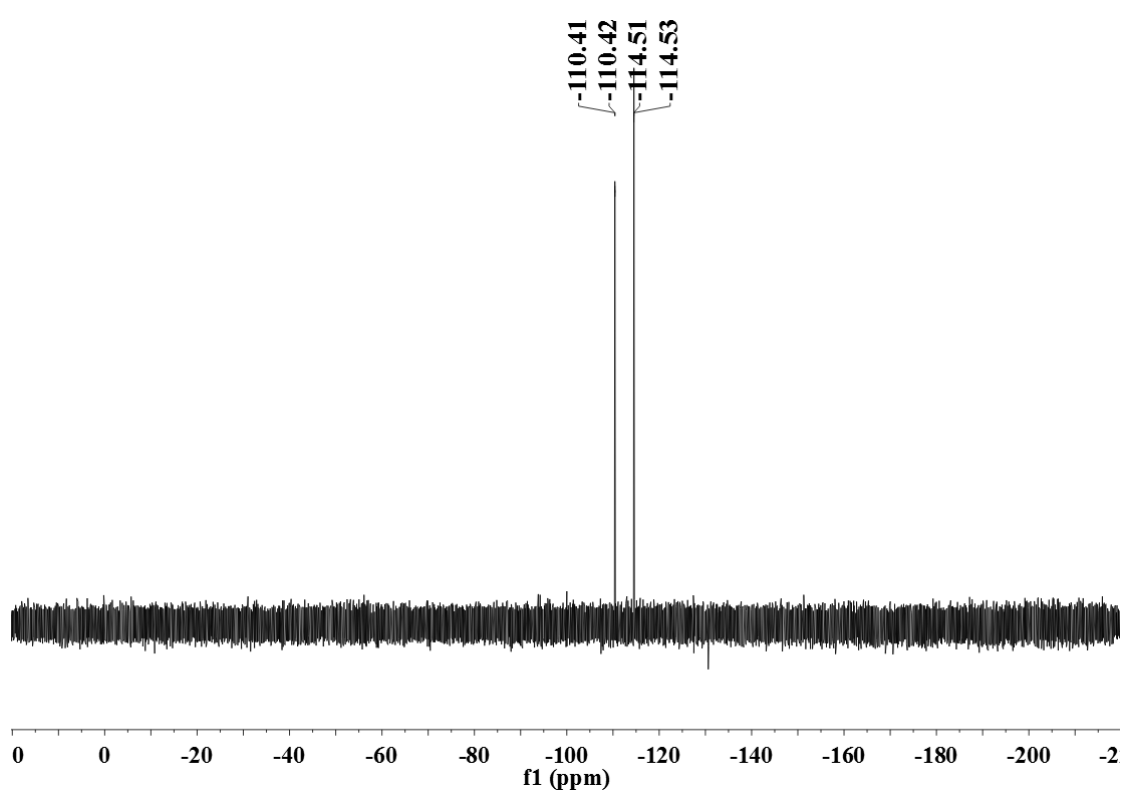

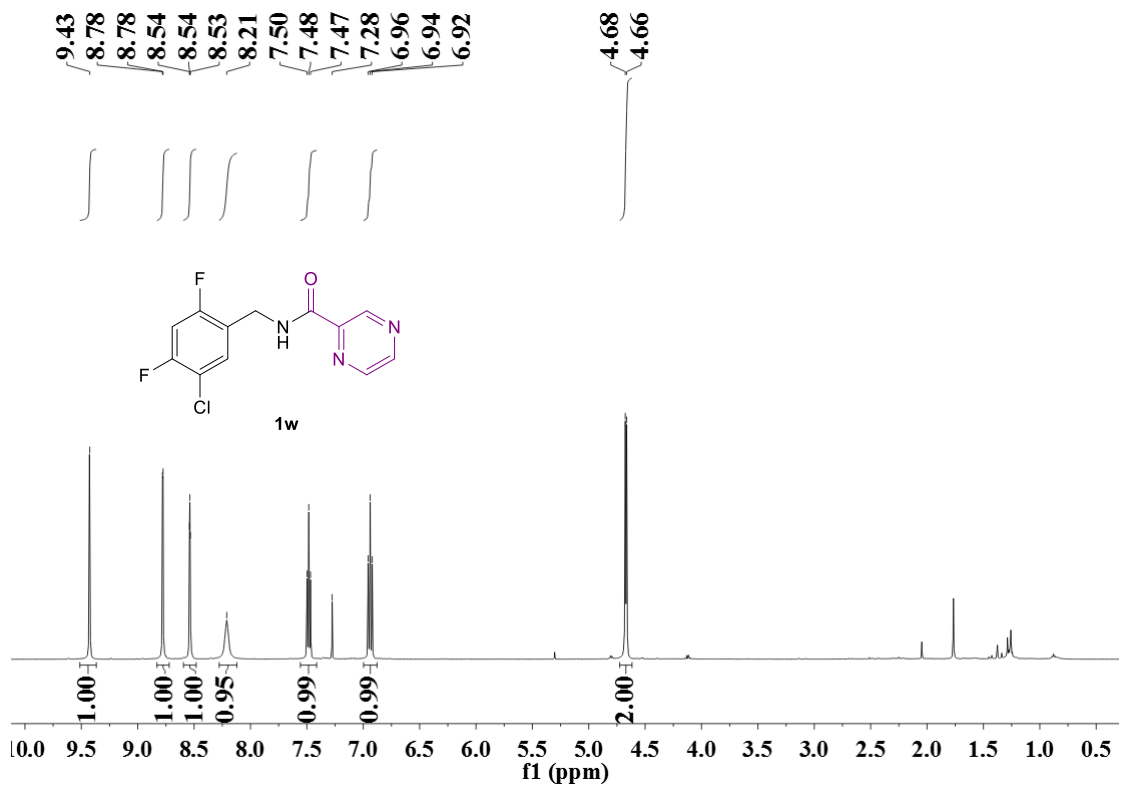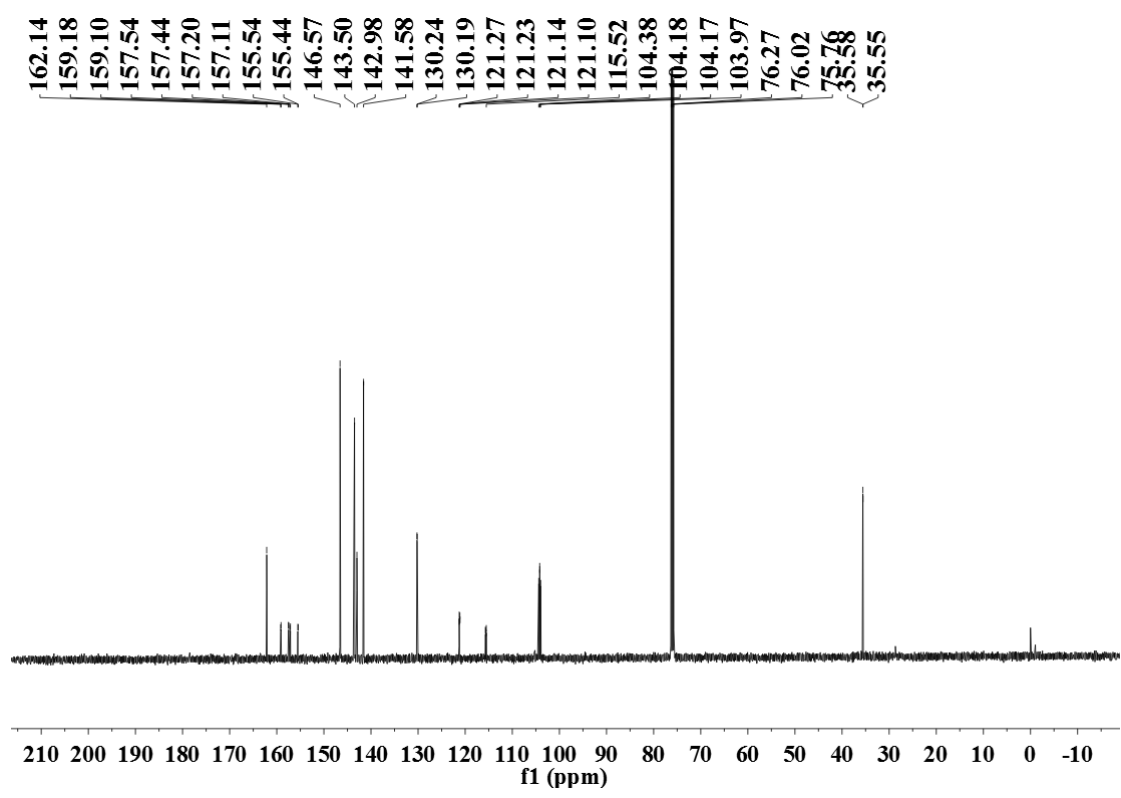

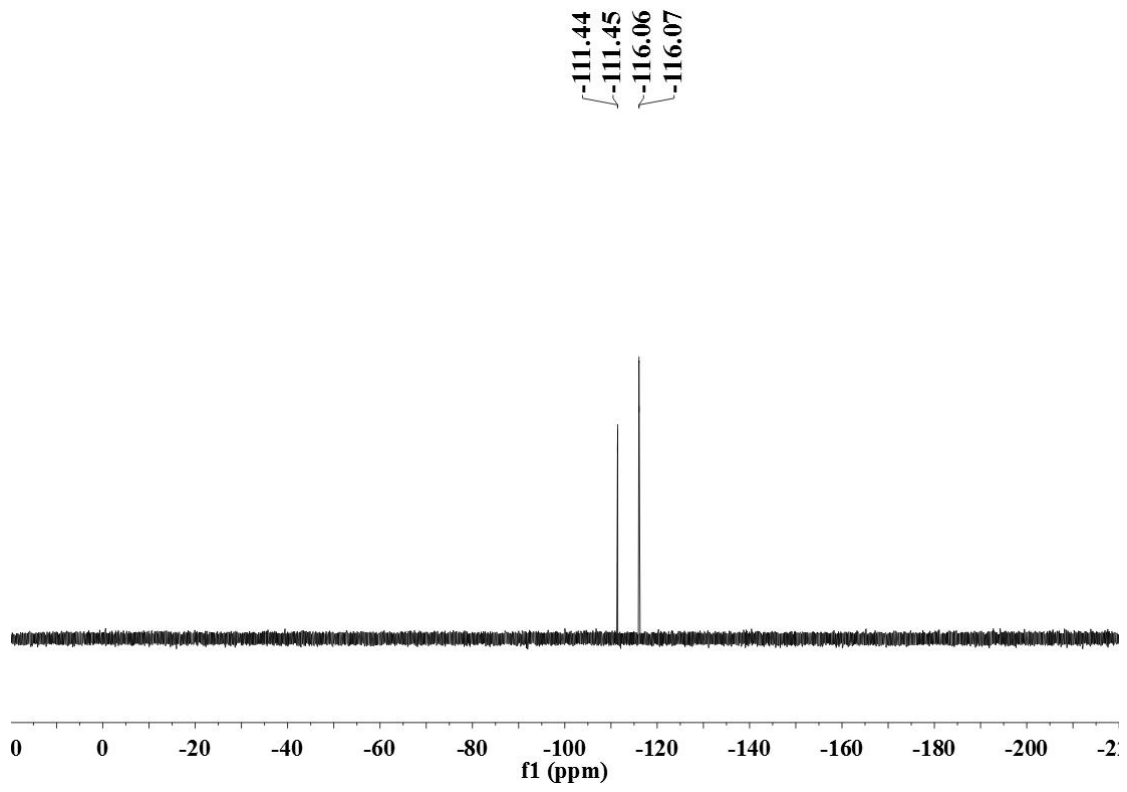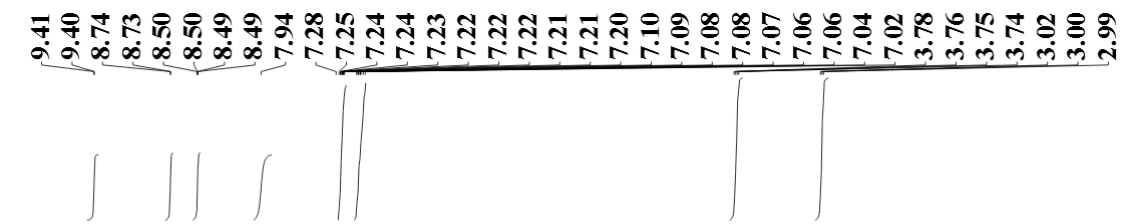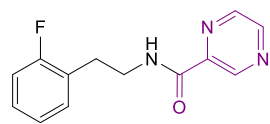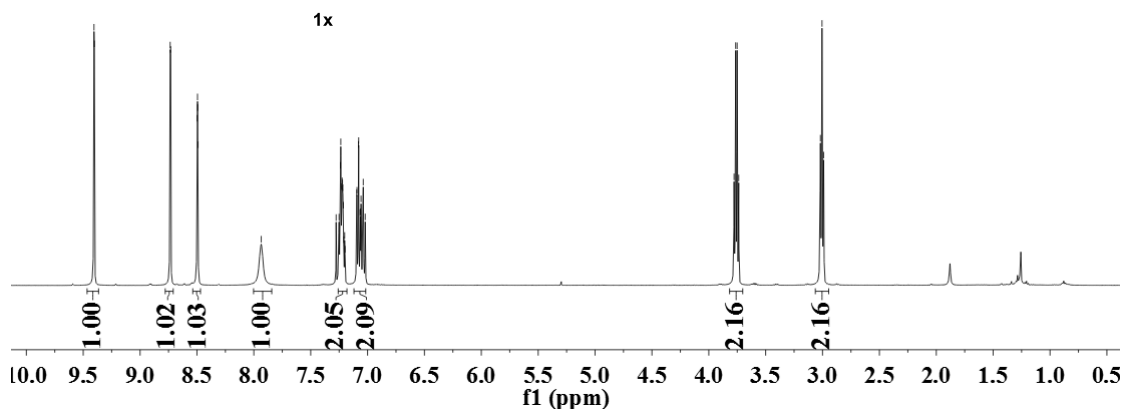

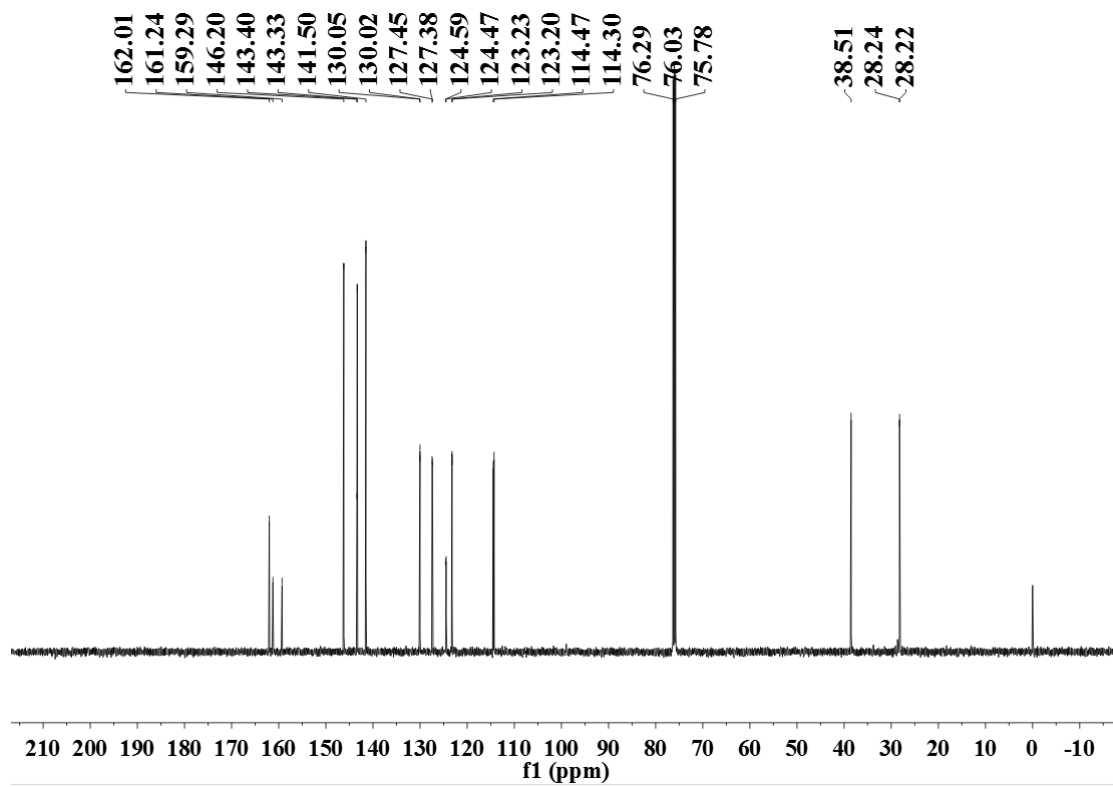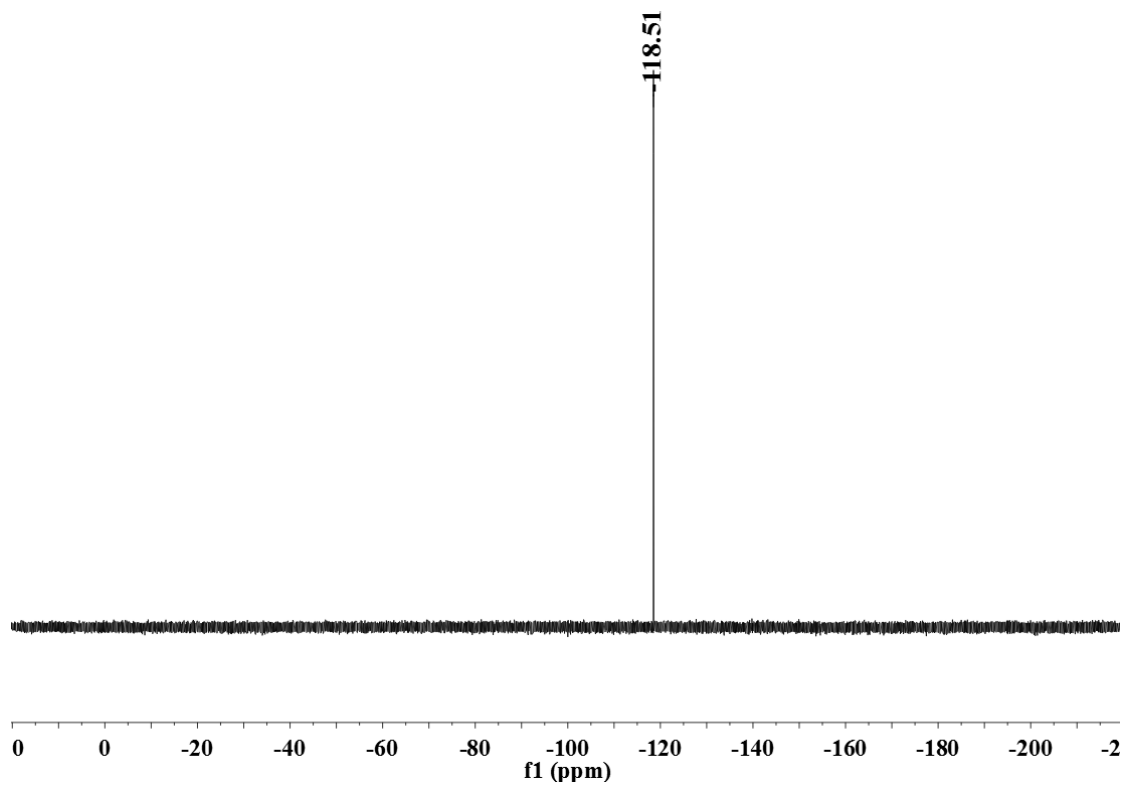

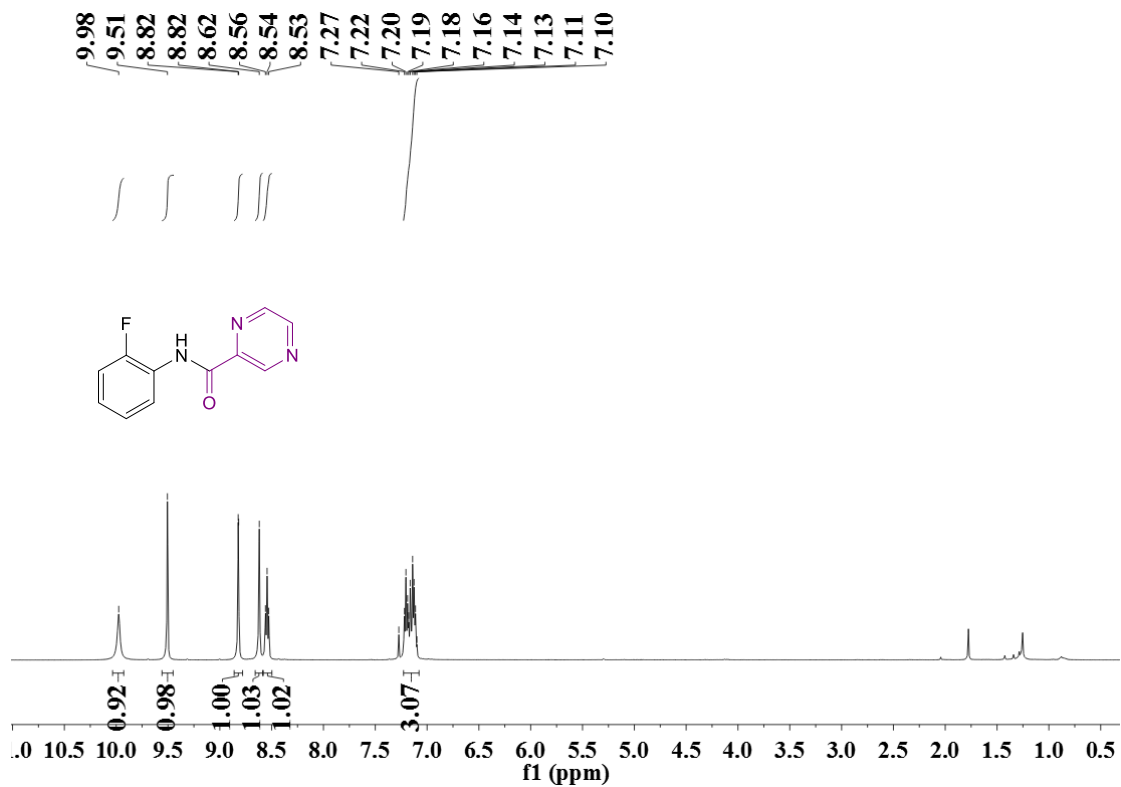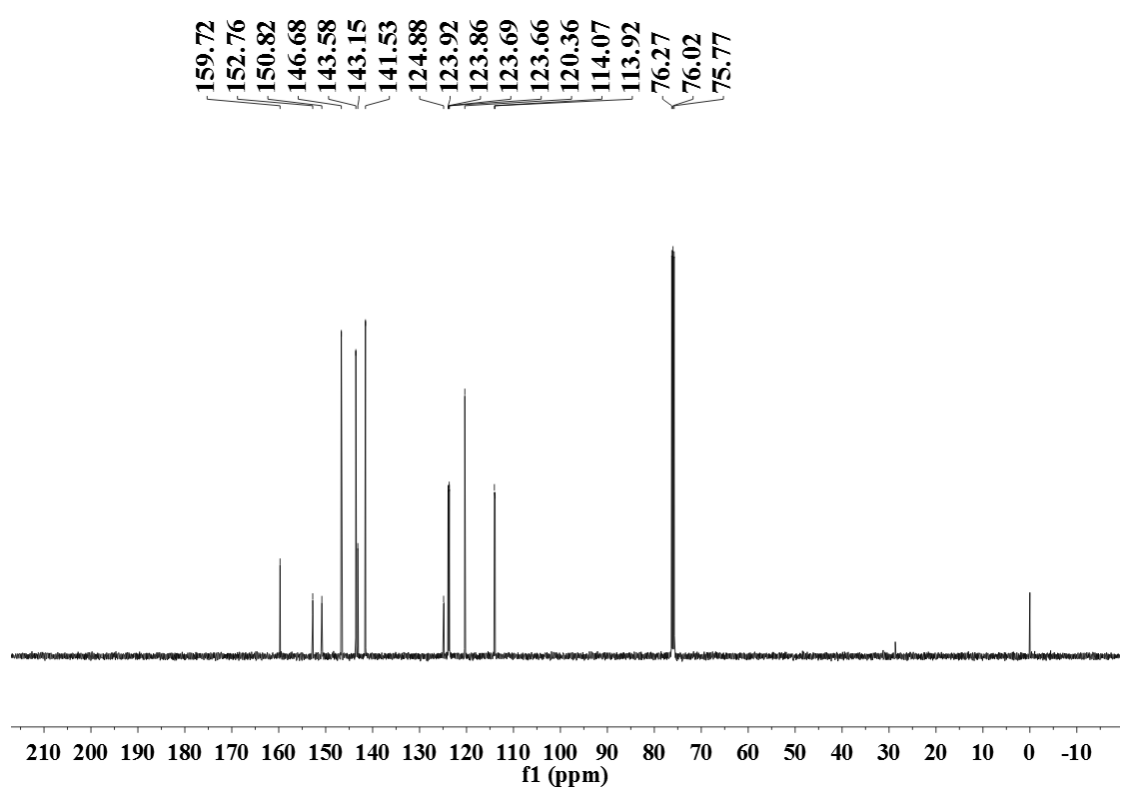

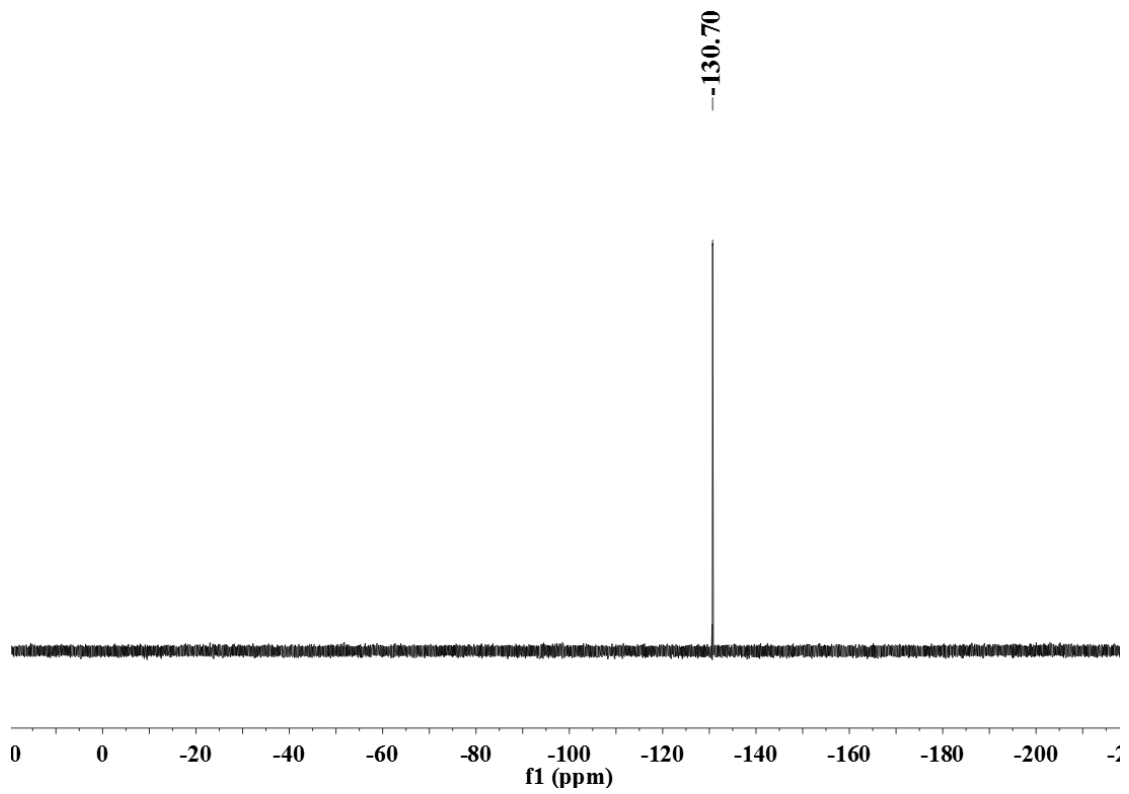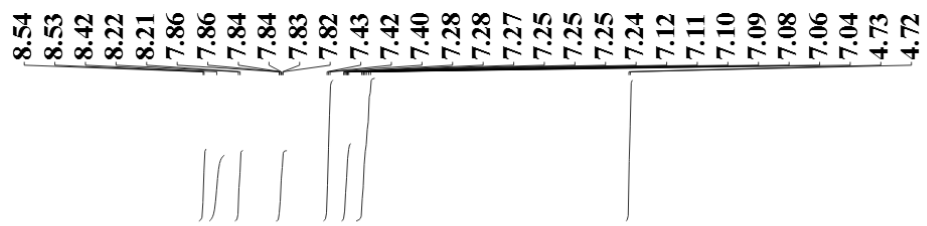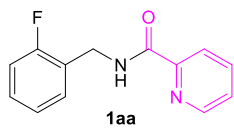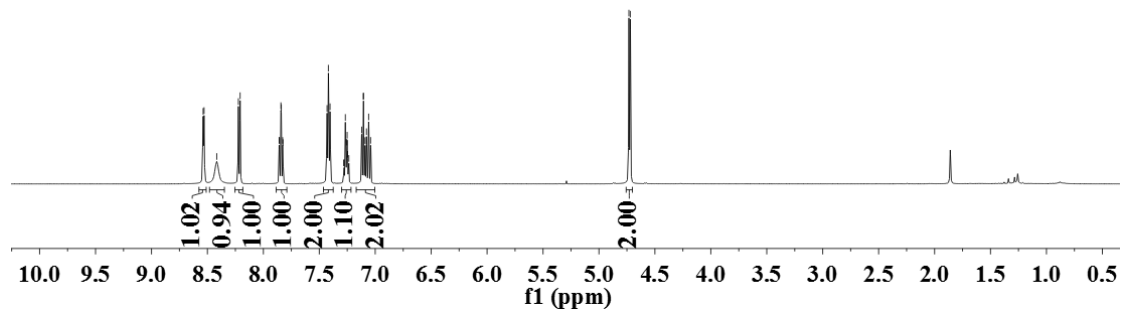

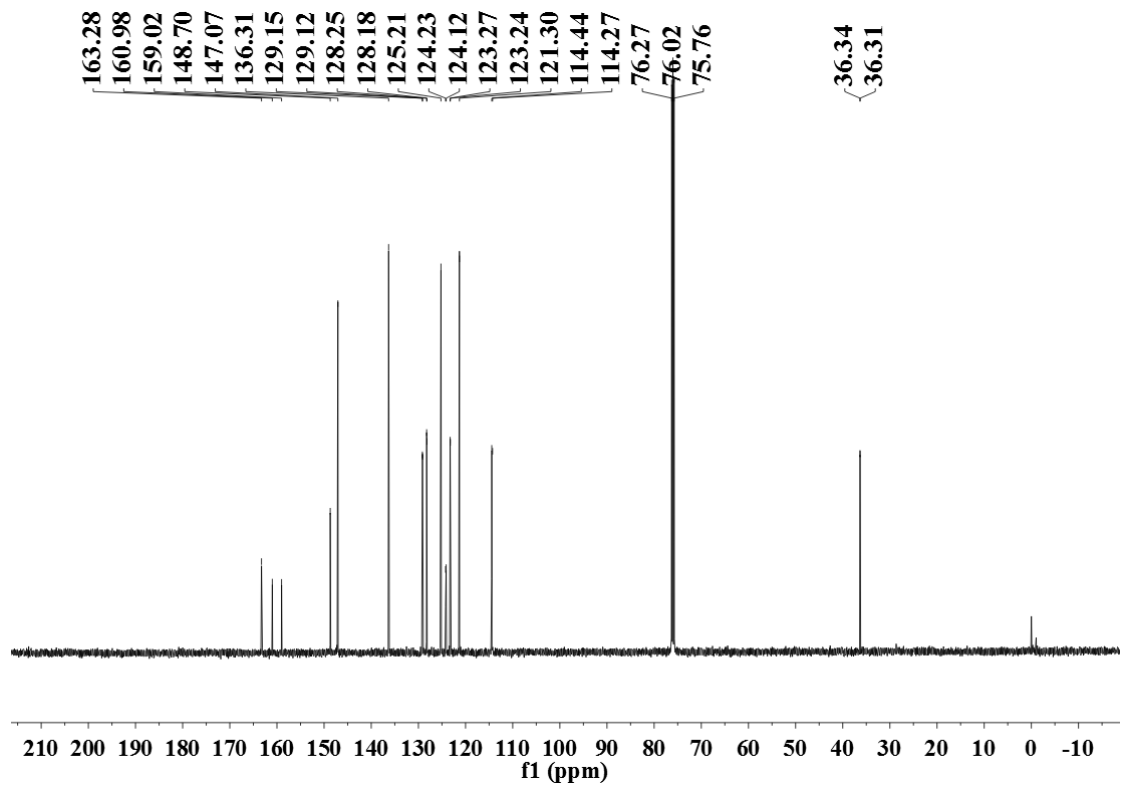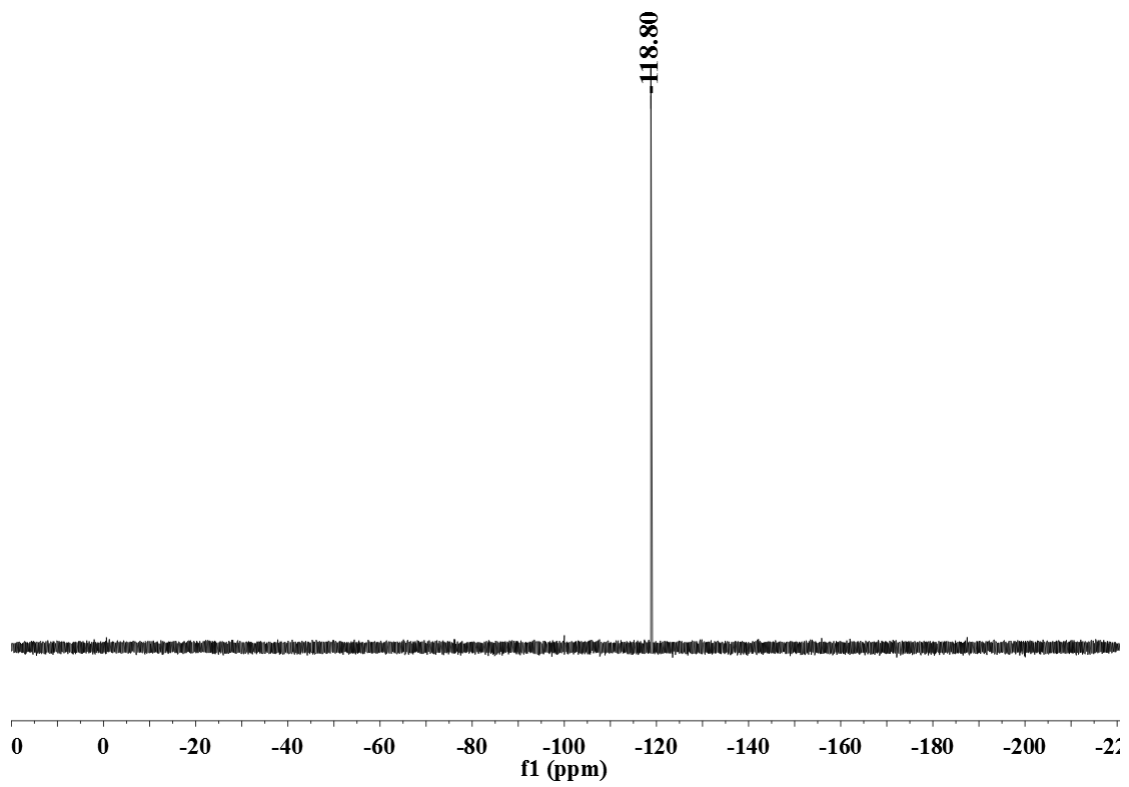



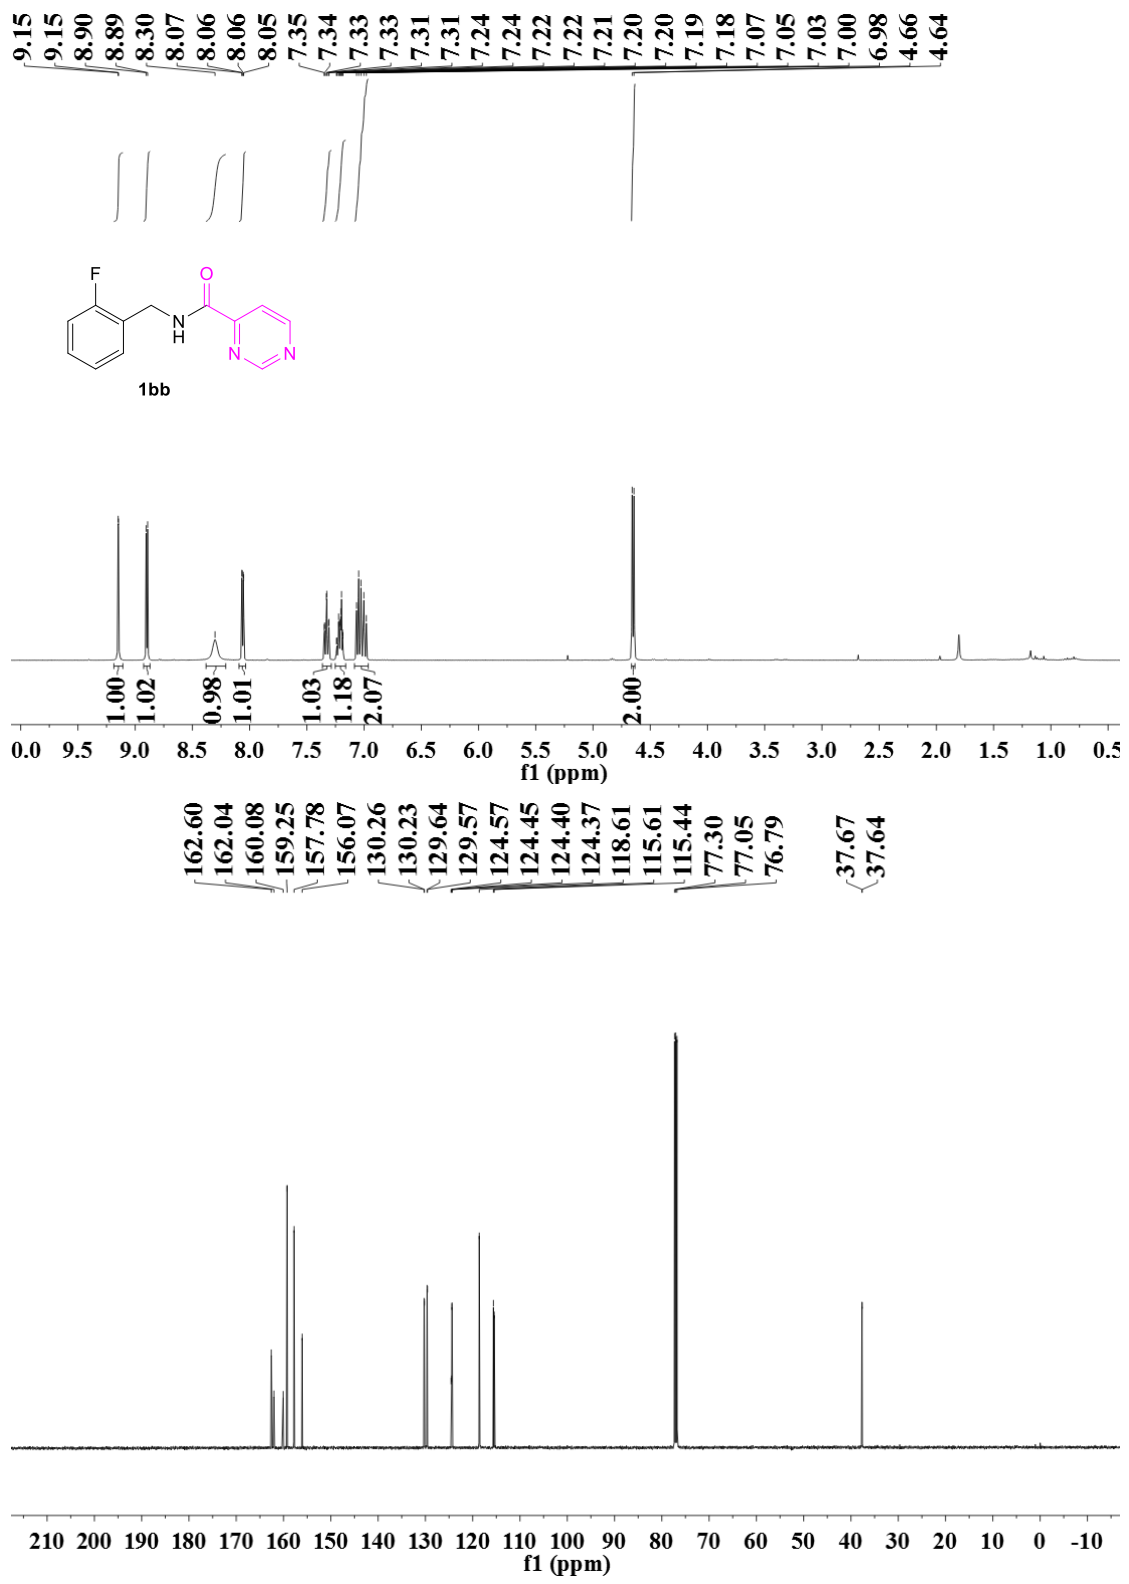

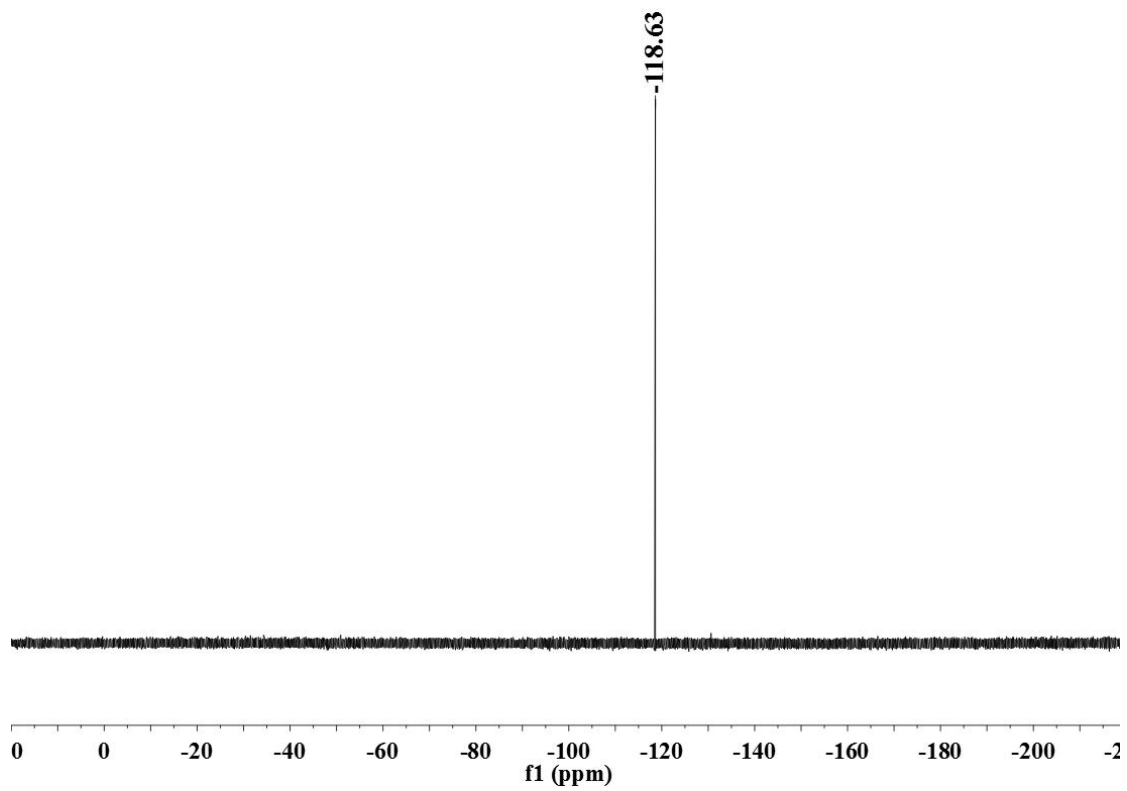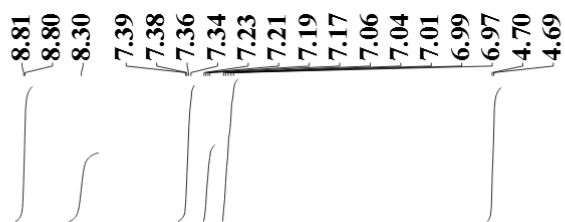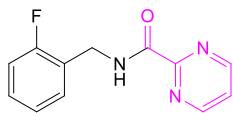

1cc

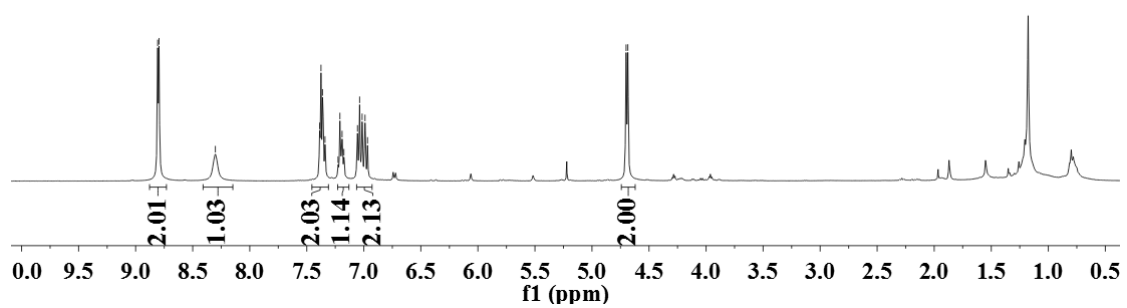

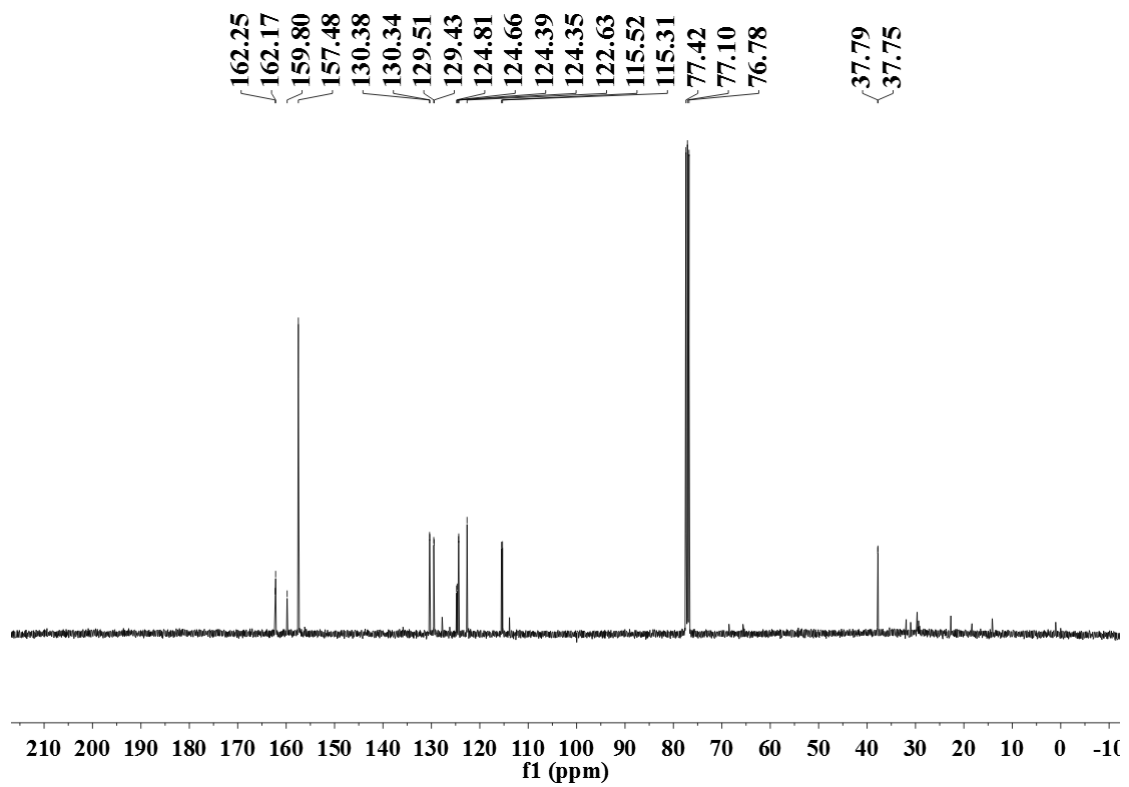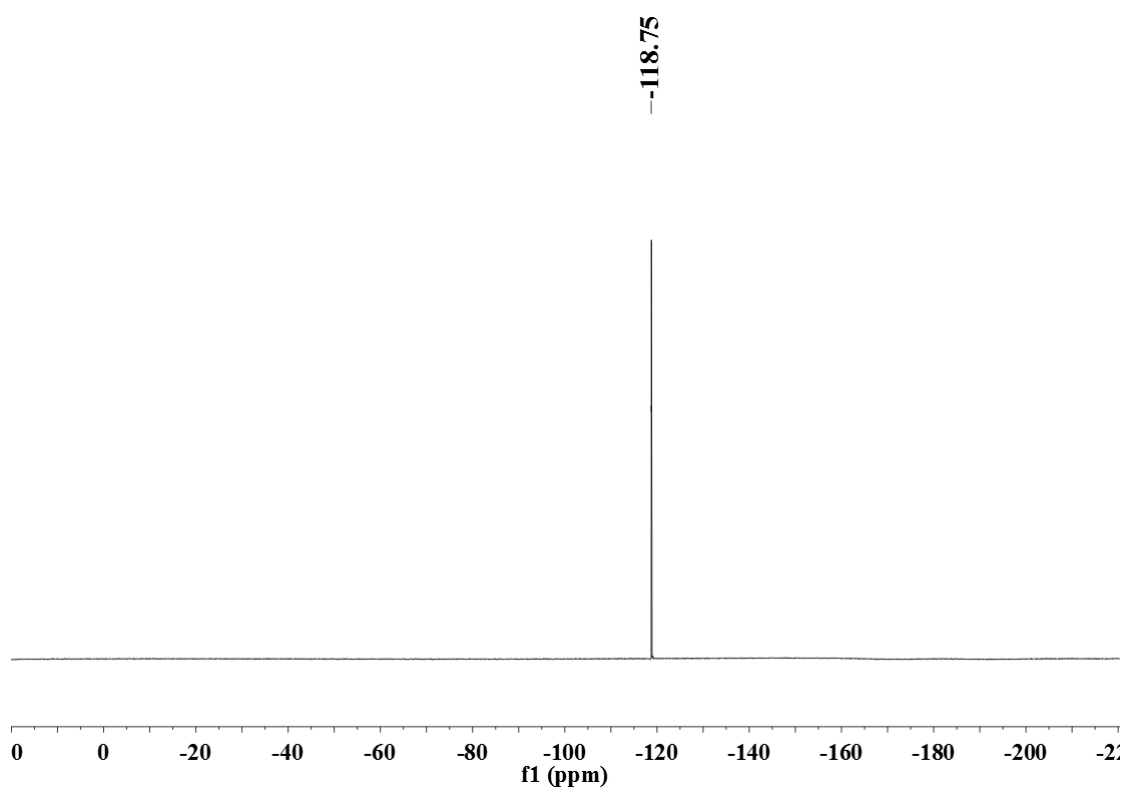

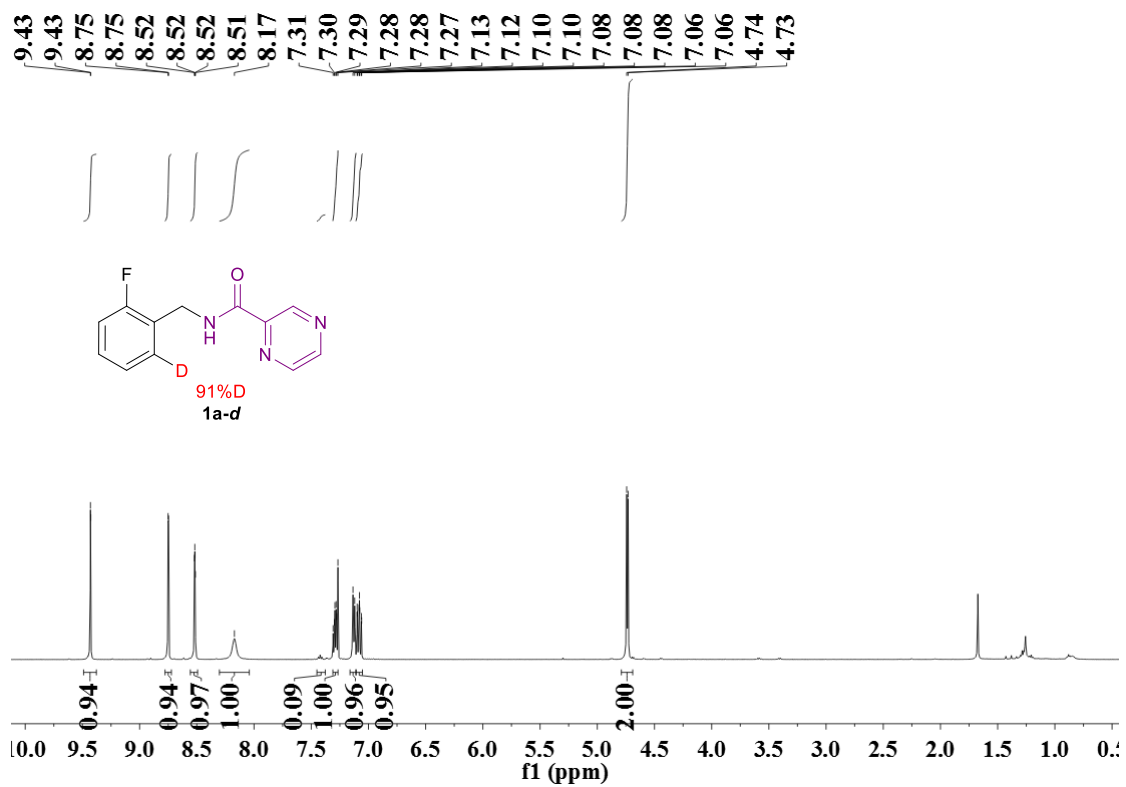

## 9.2 NMR Spectra of 3

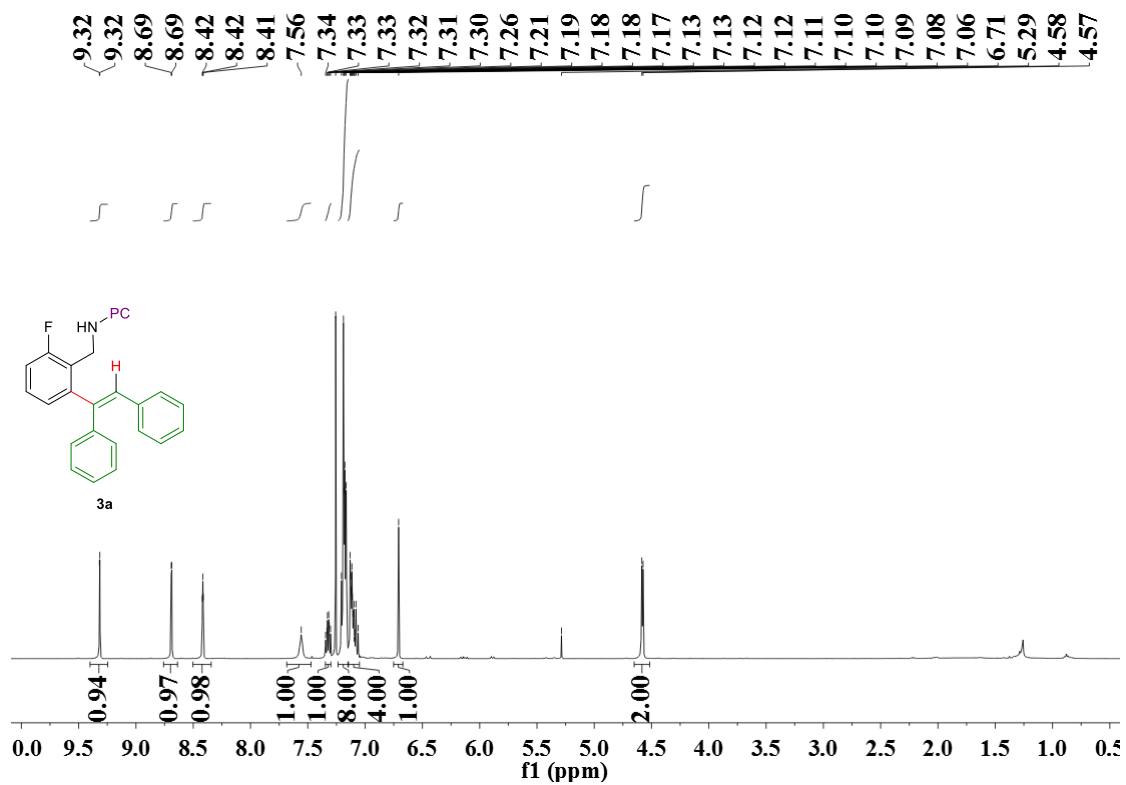

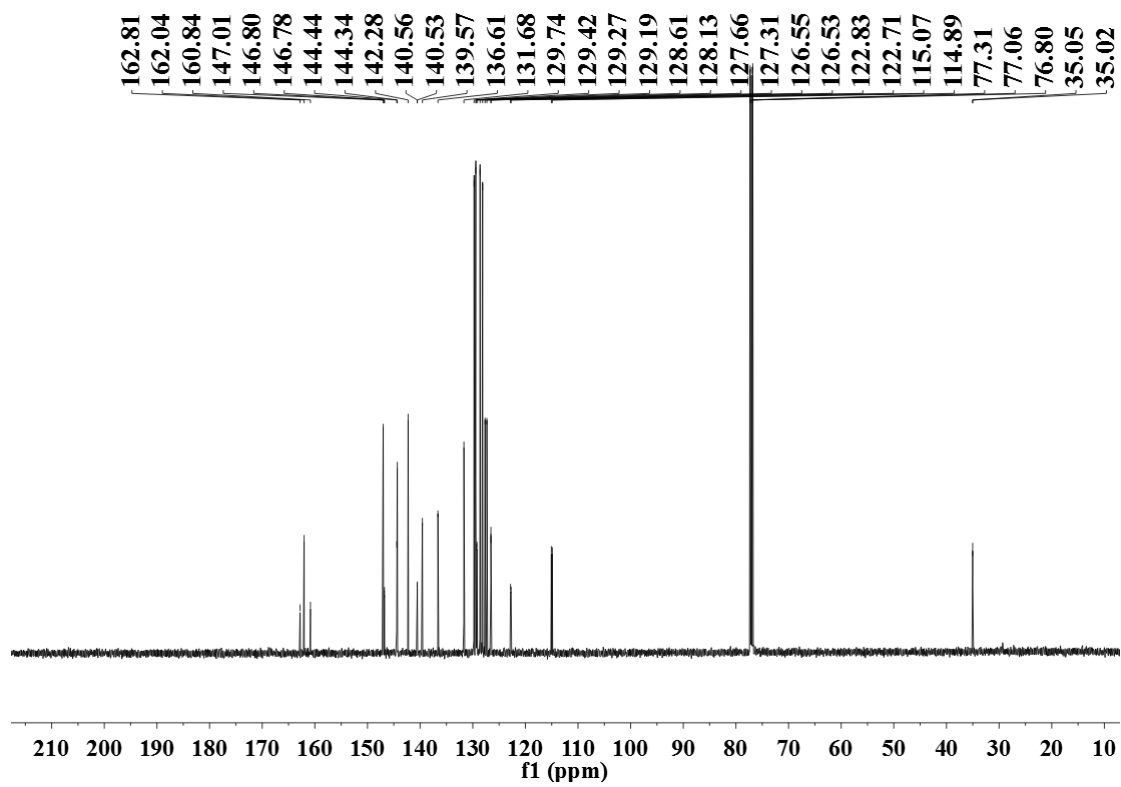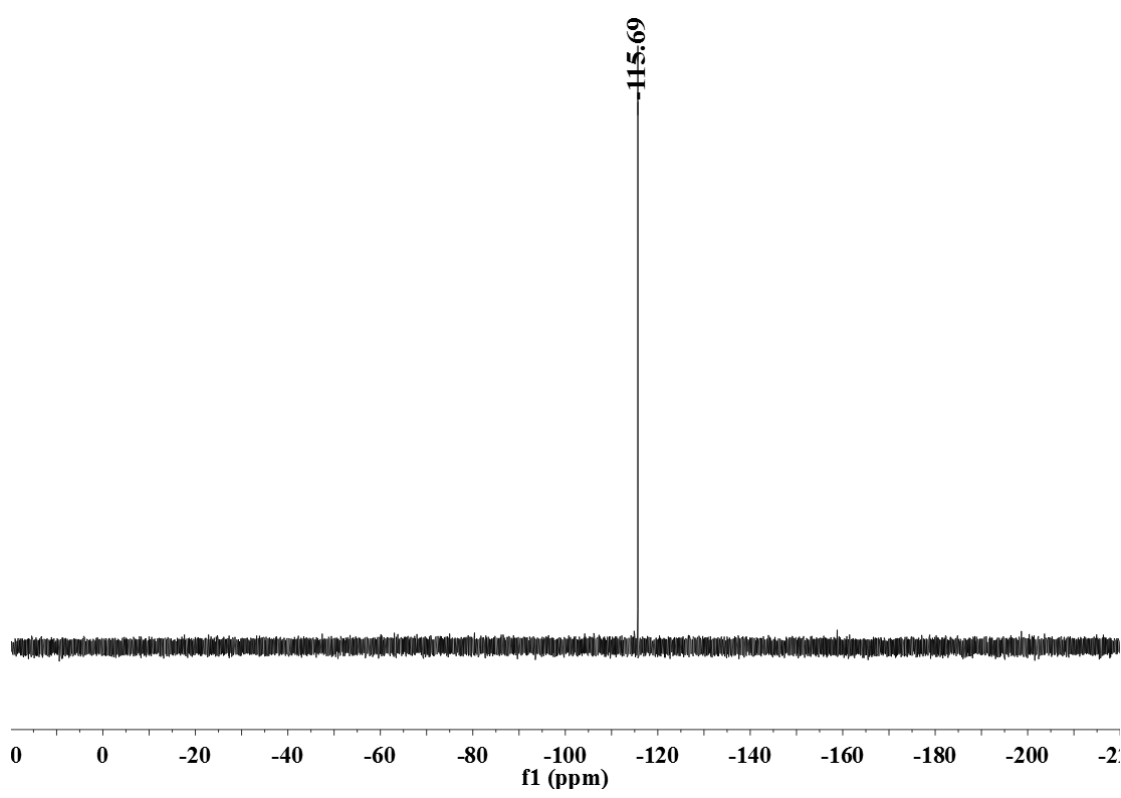

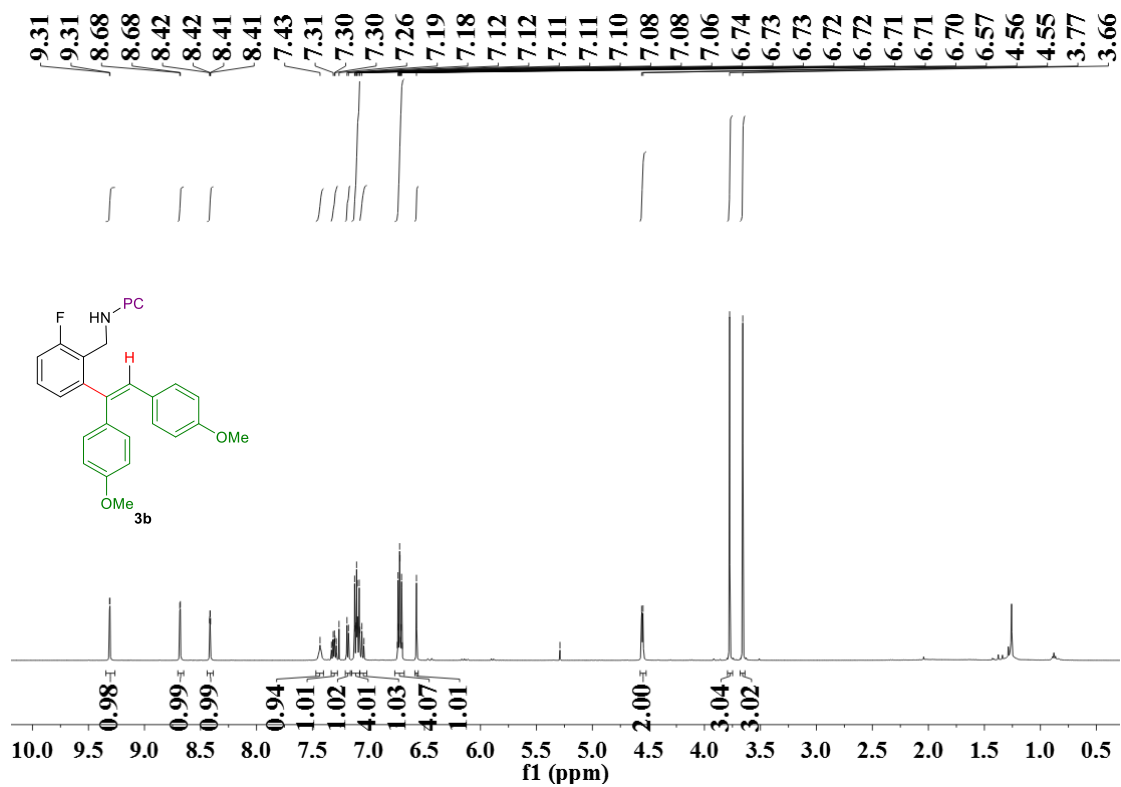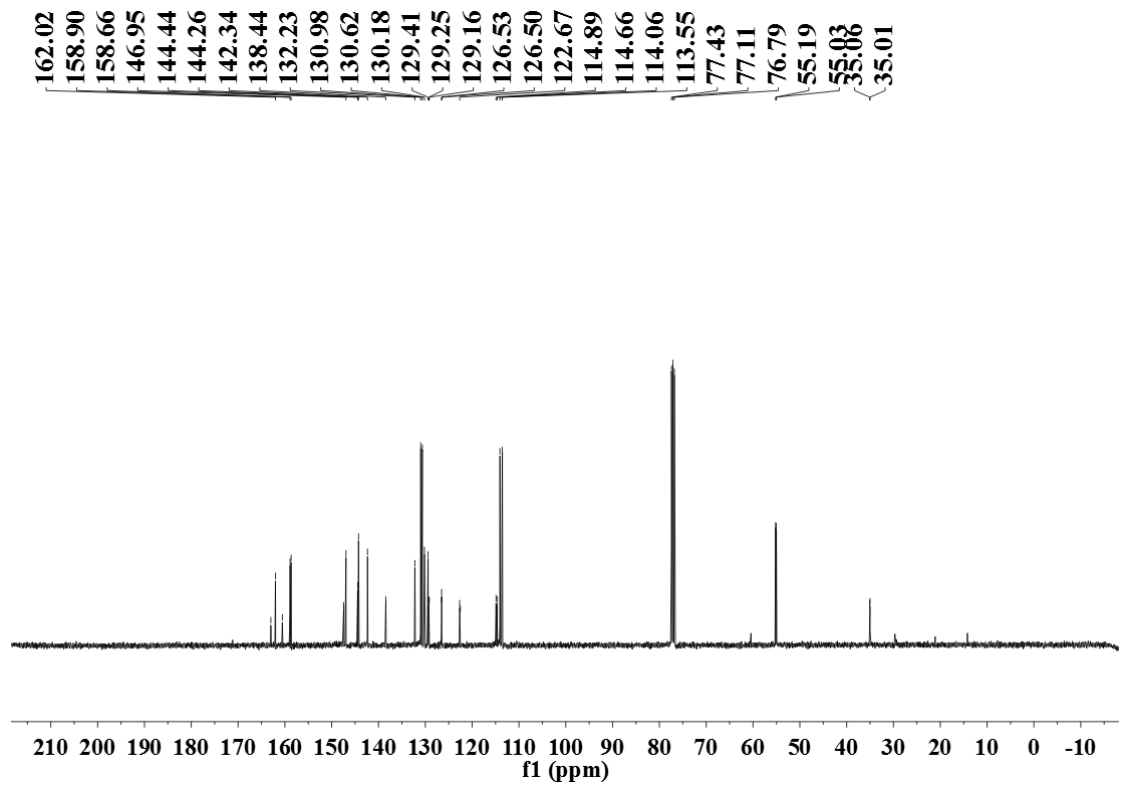

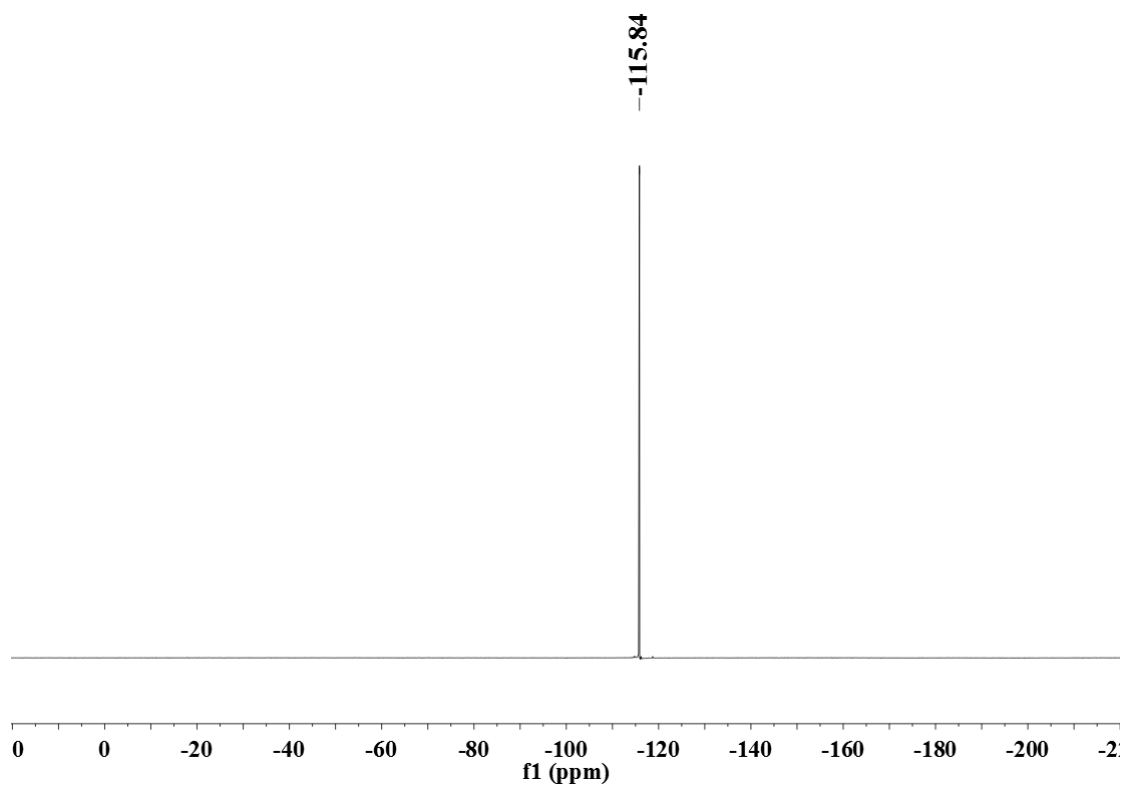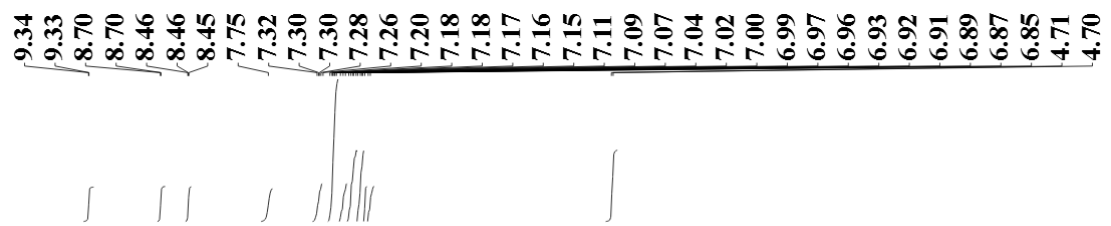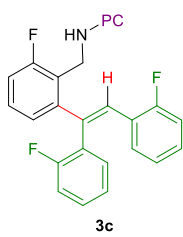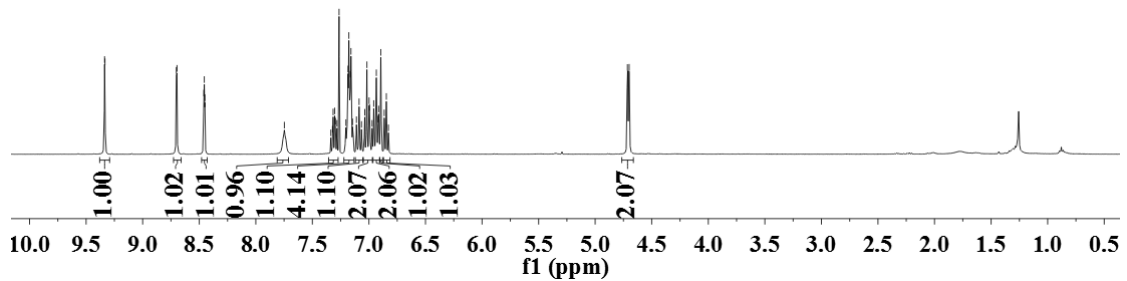

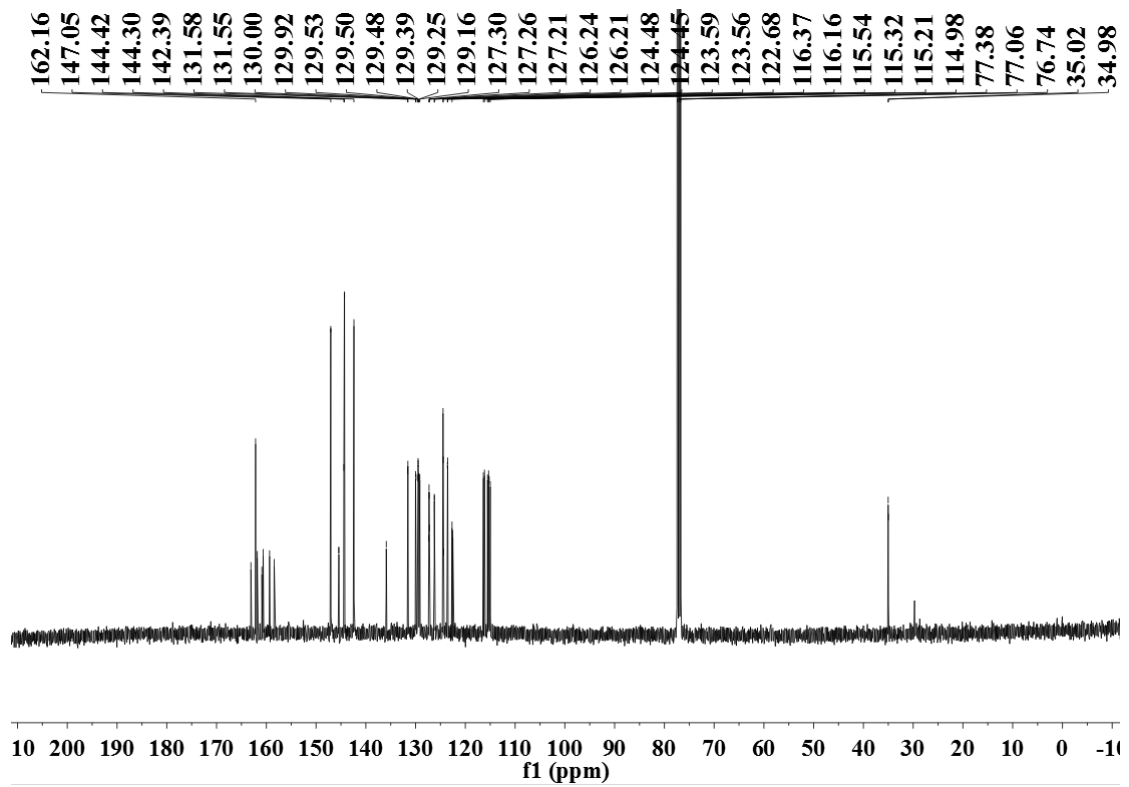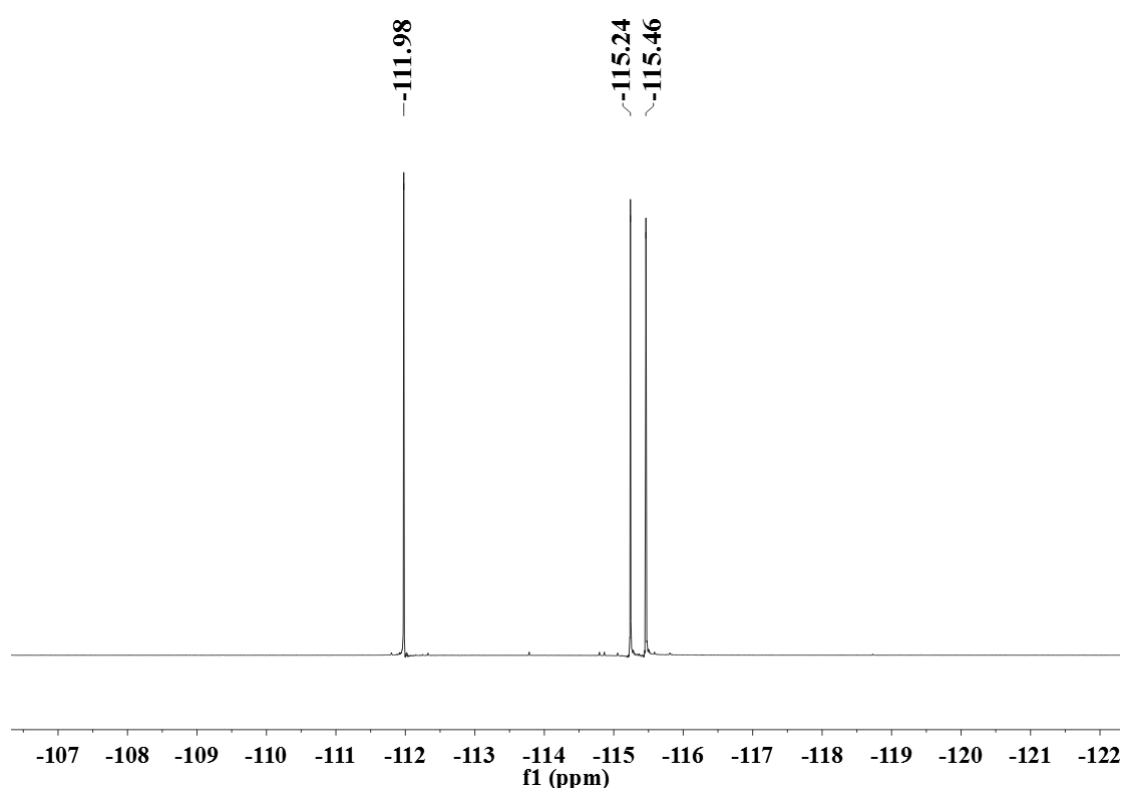



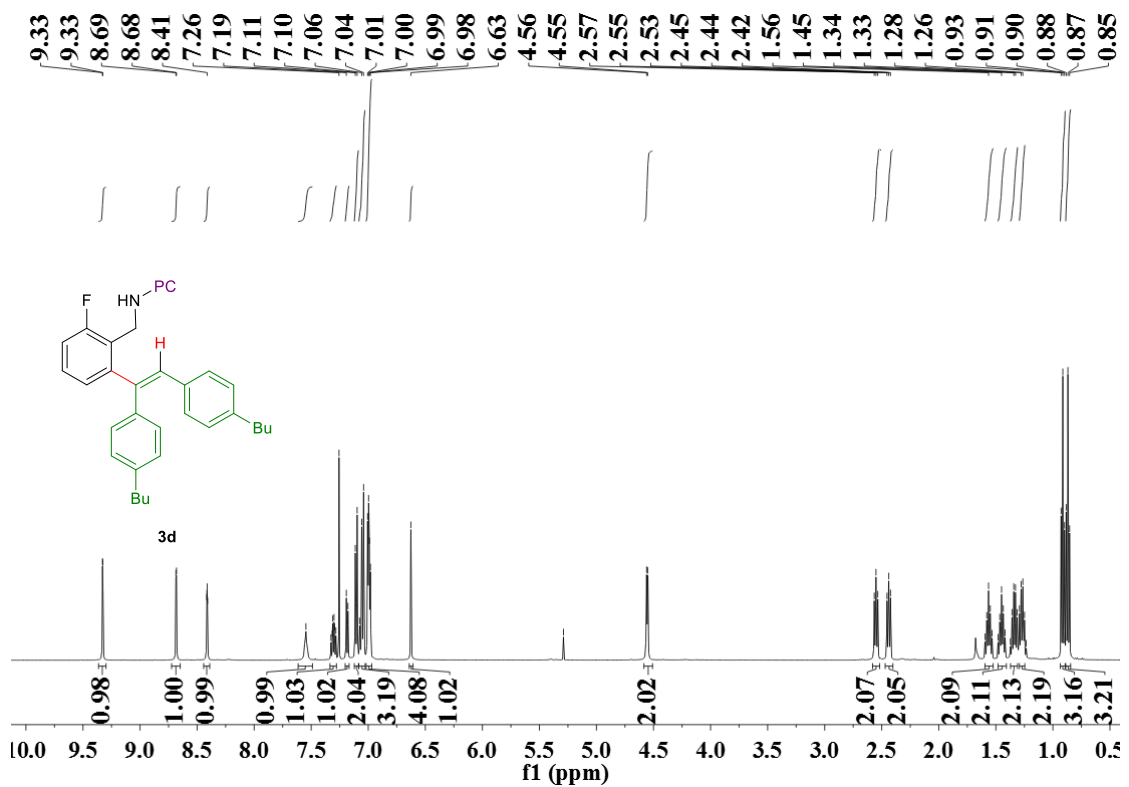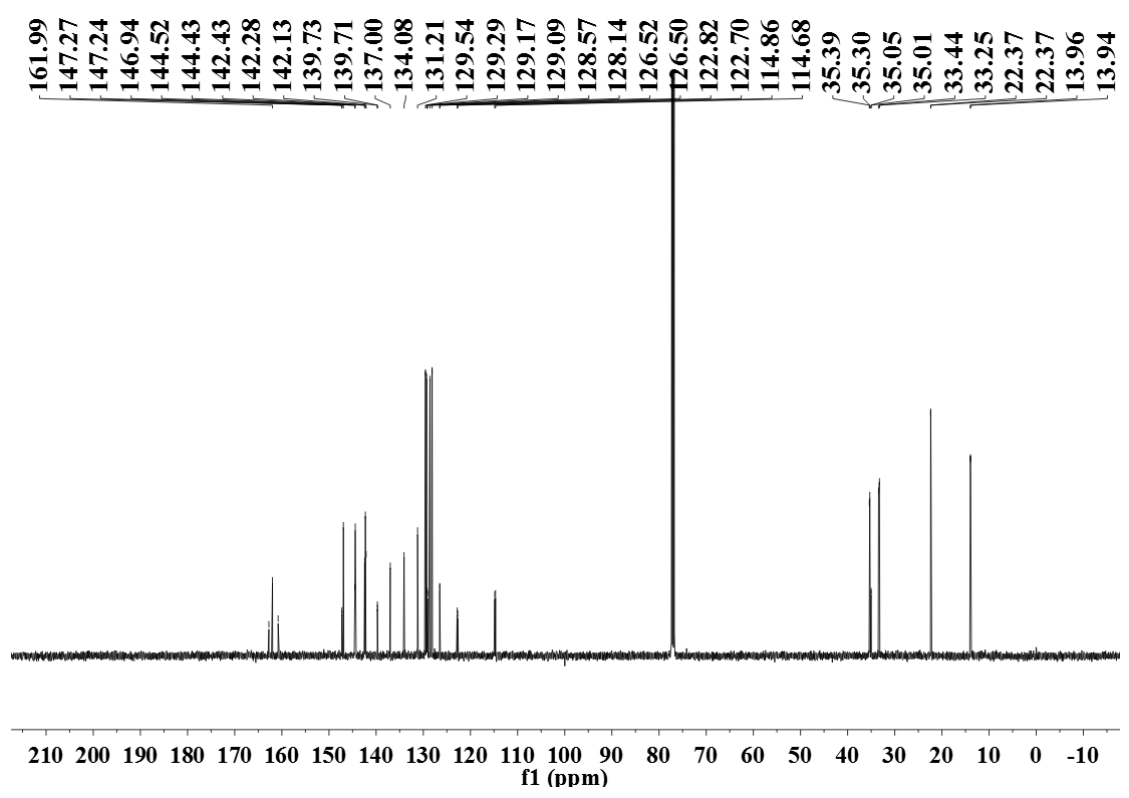

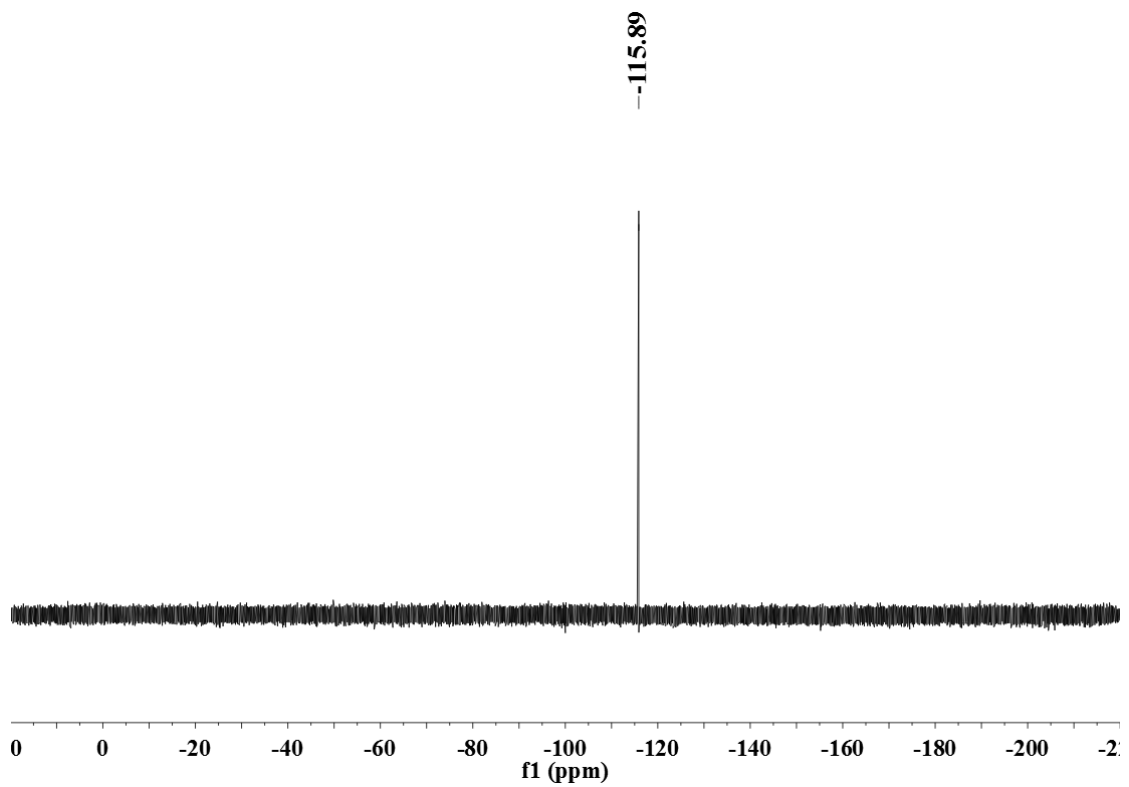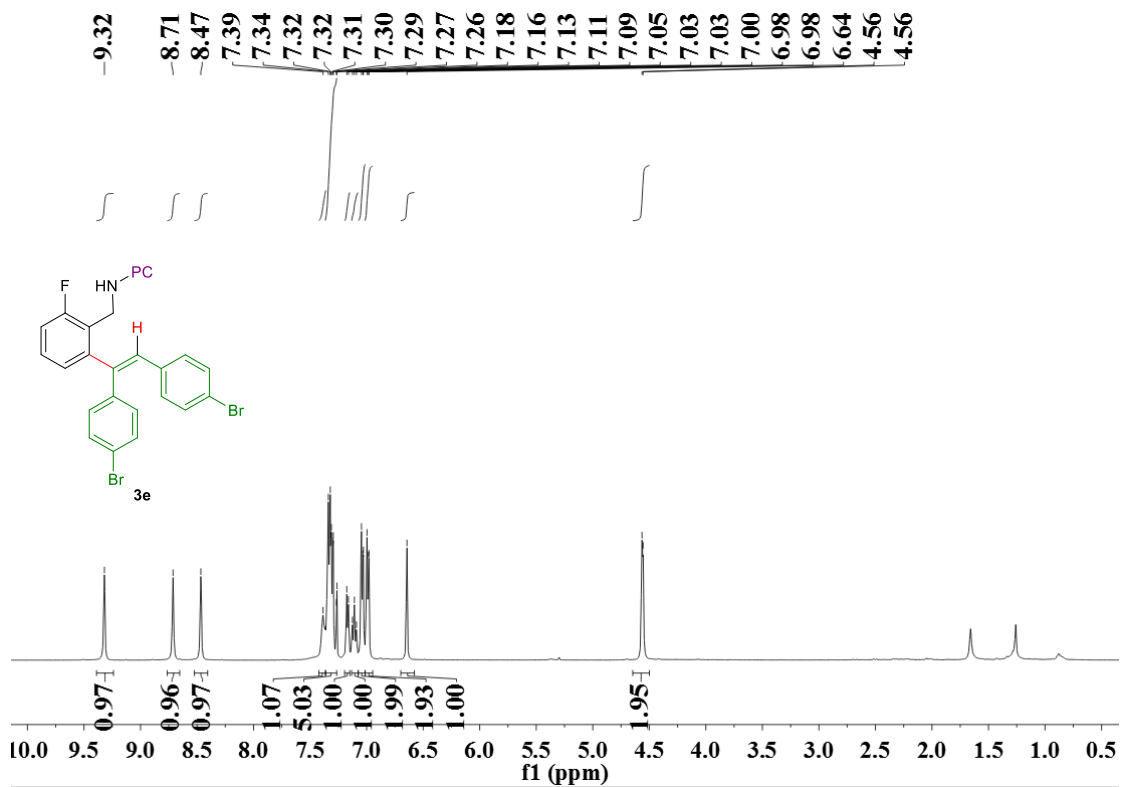

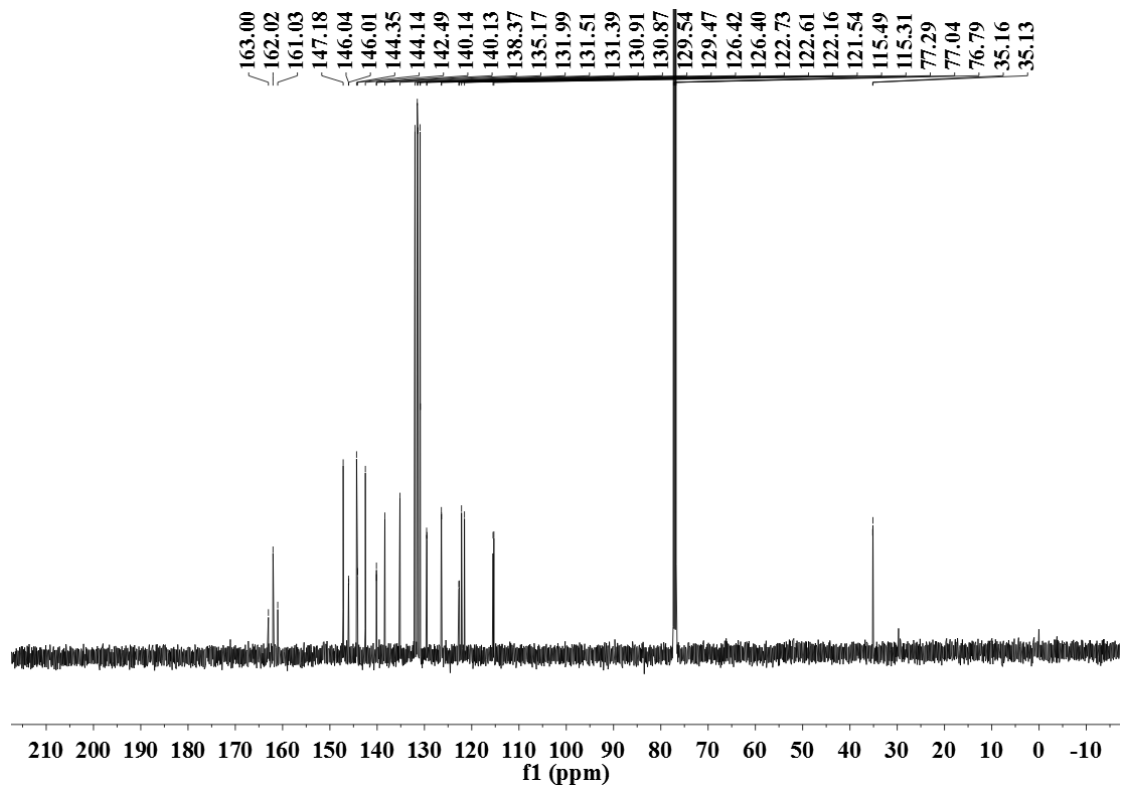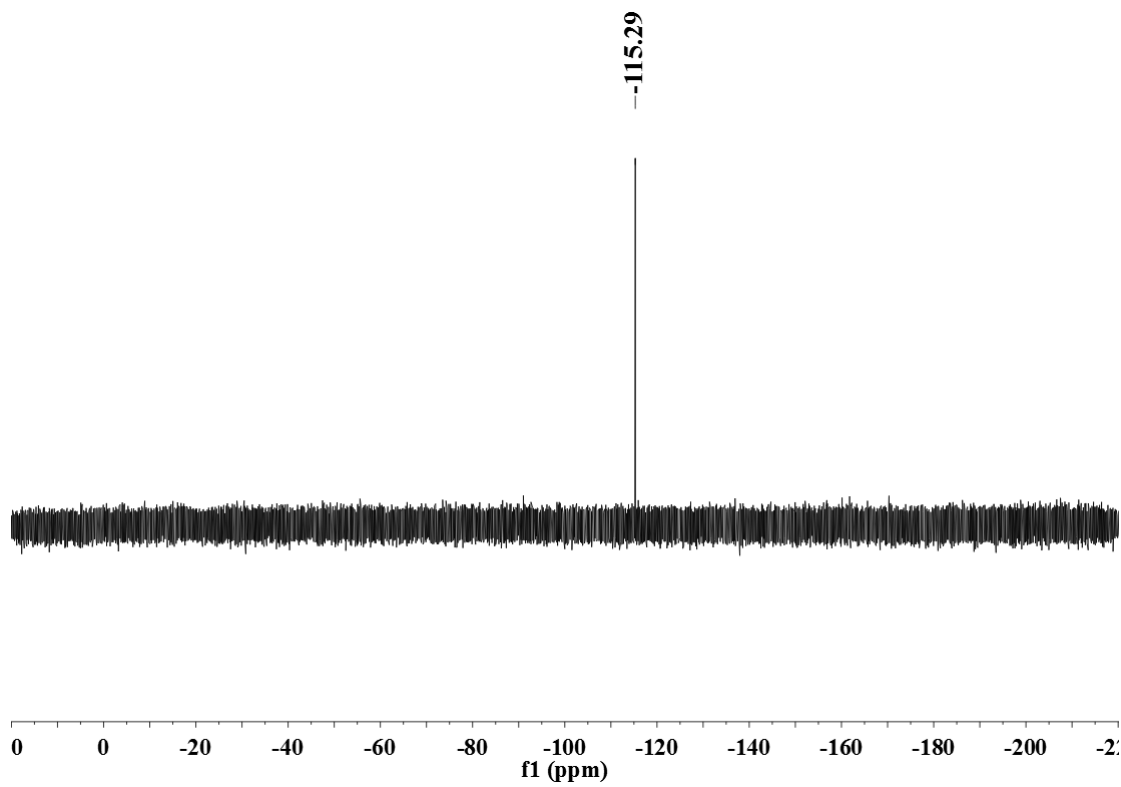

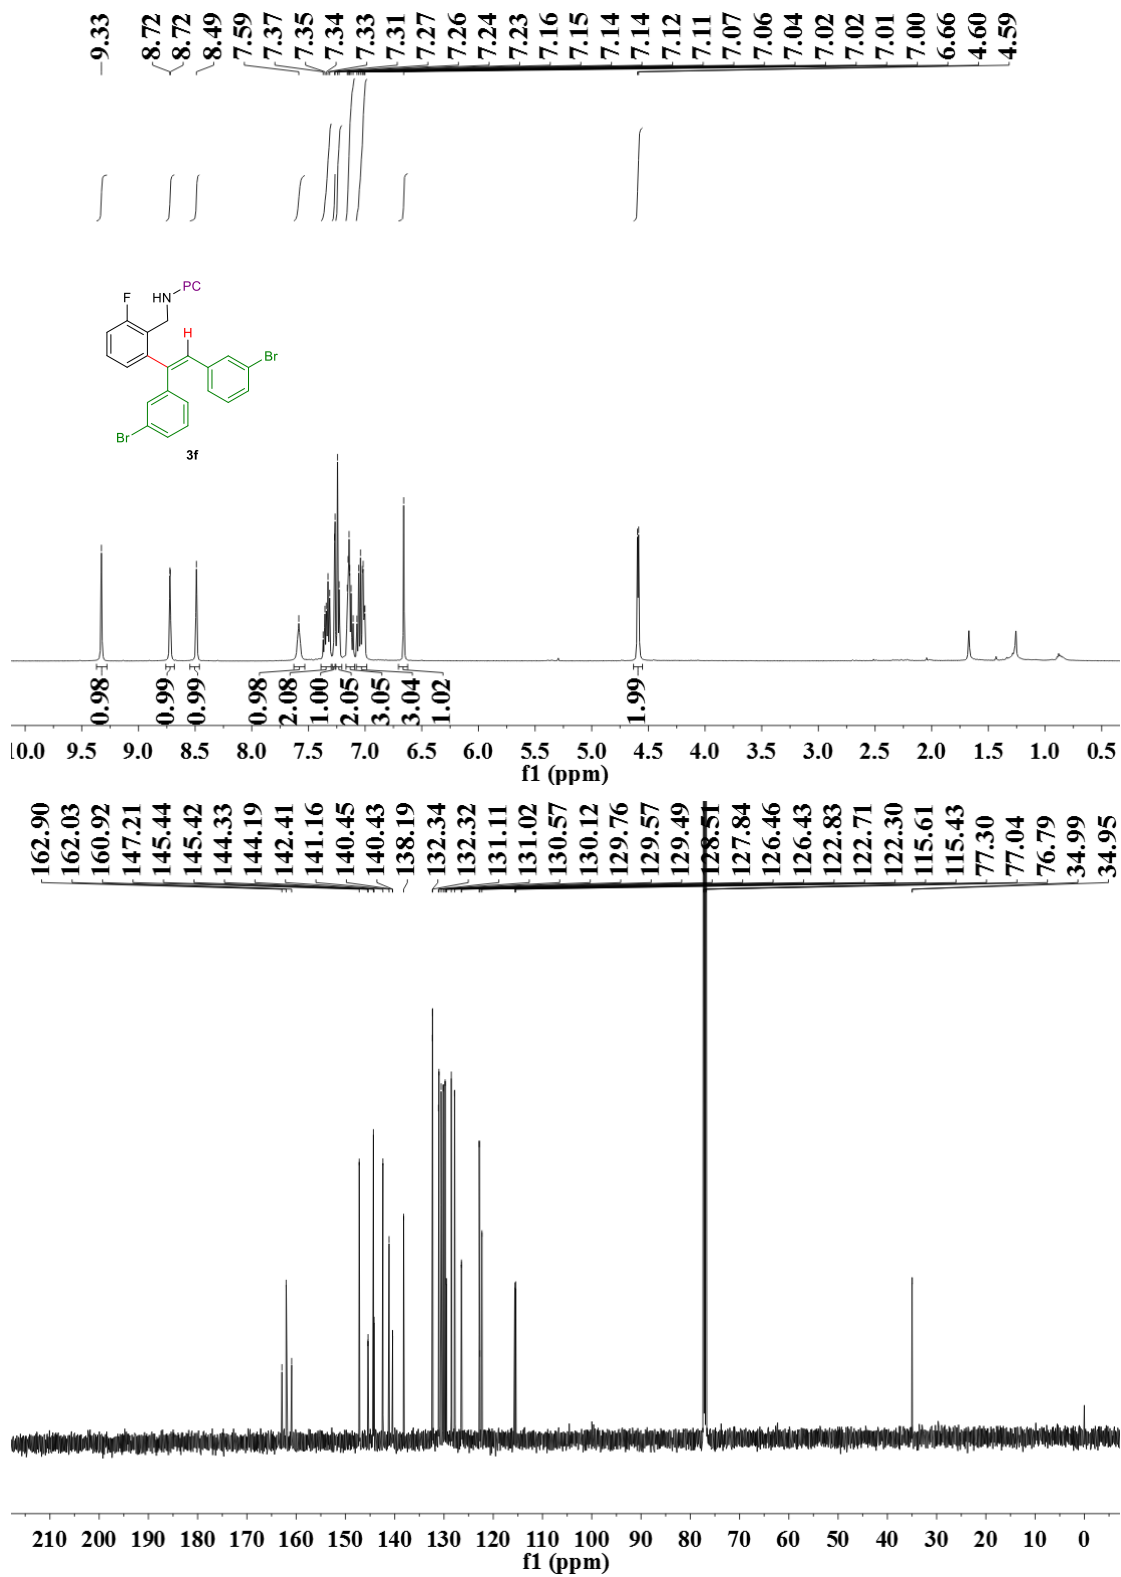

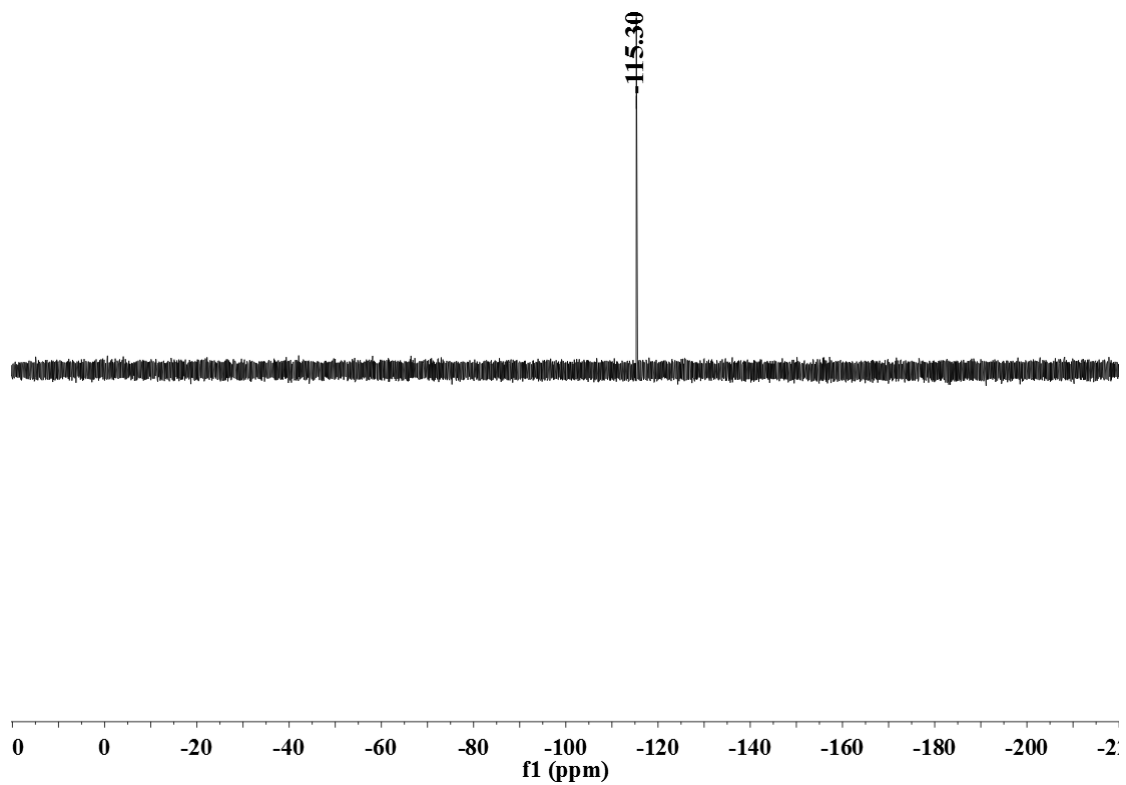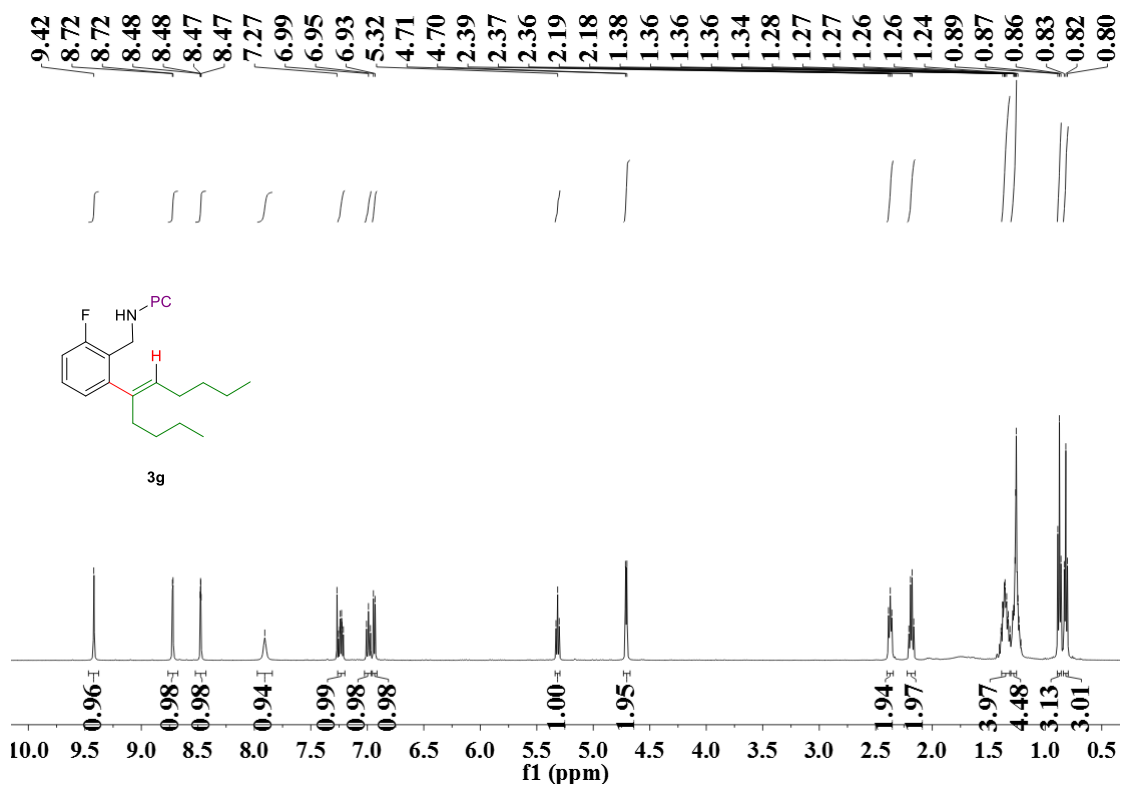

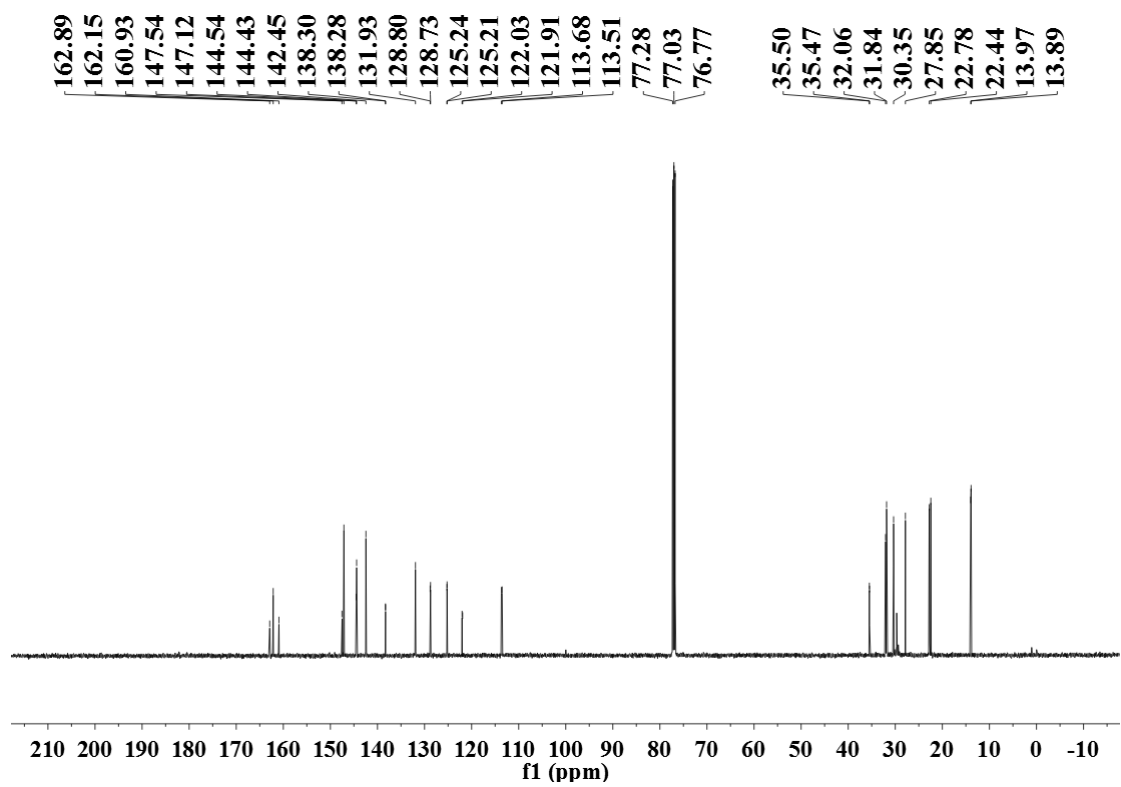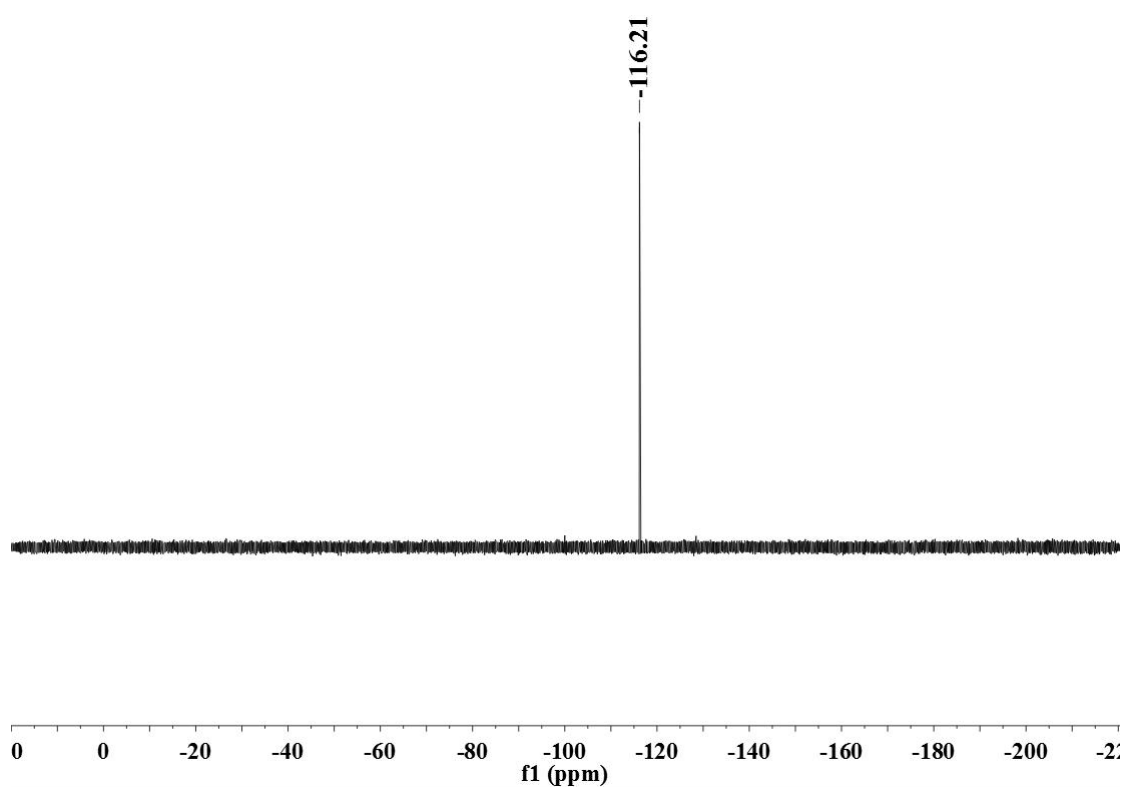

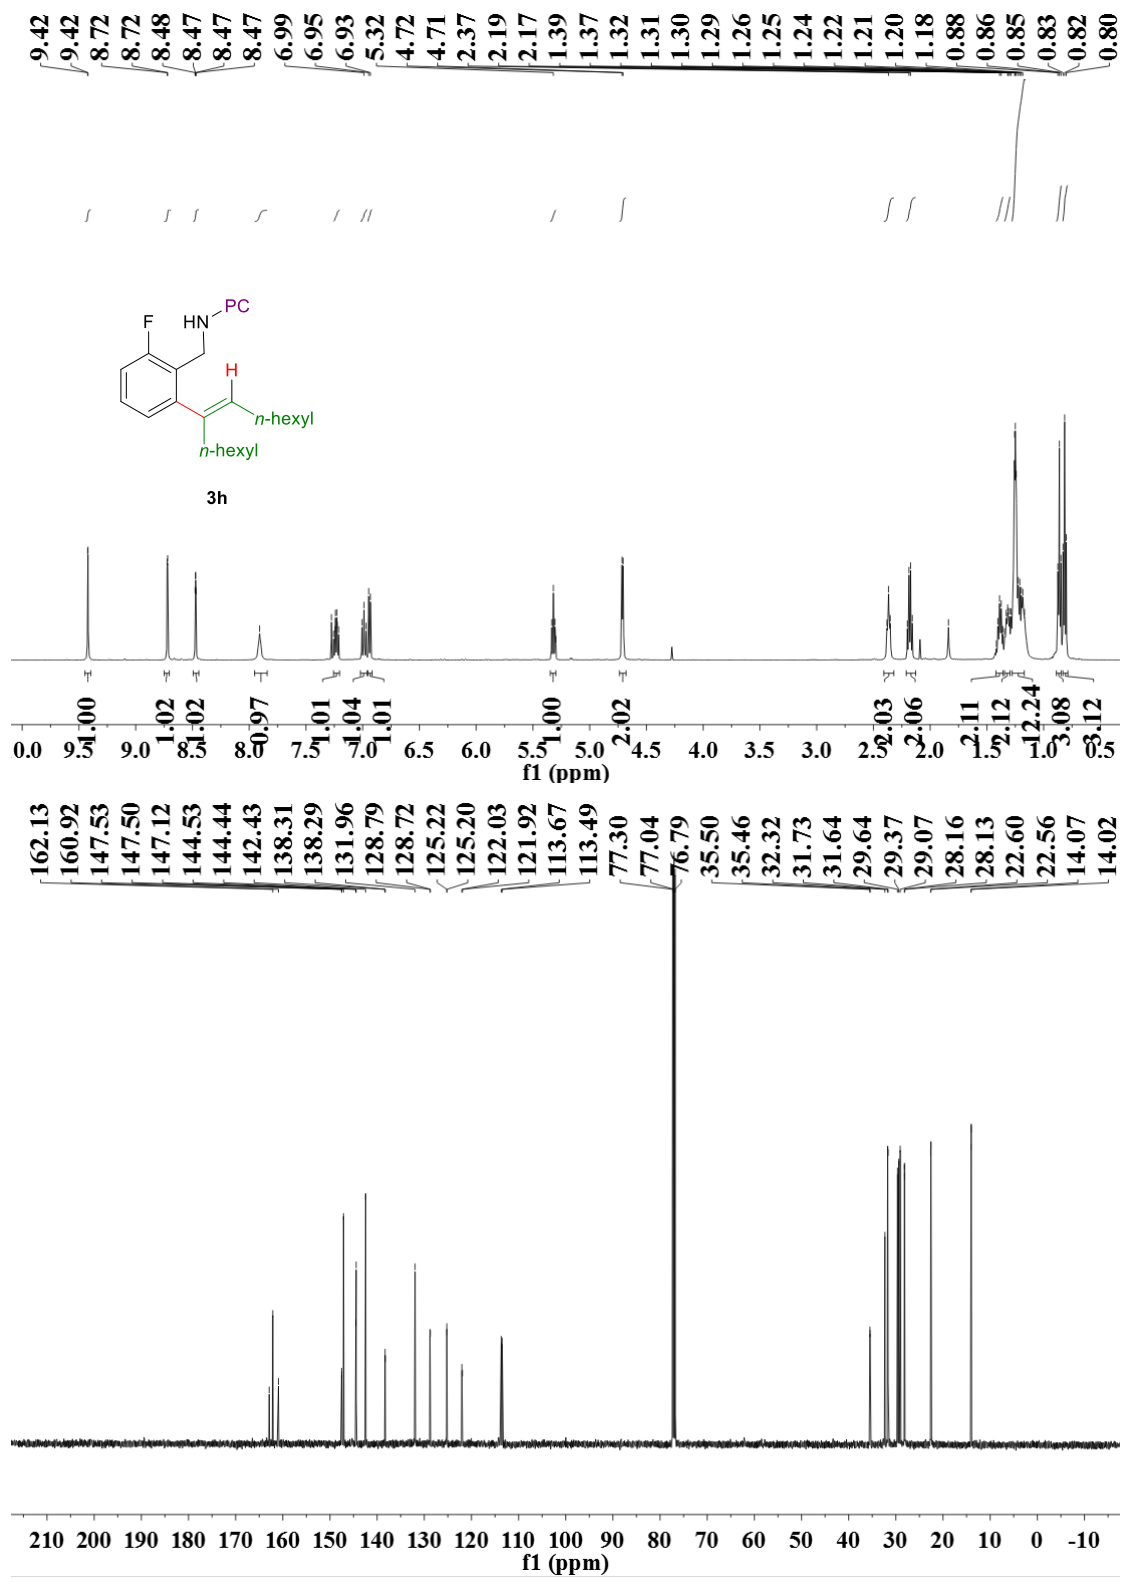

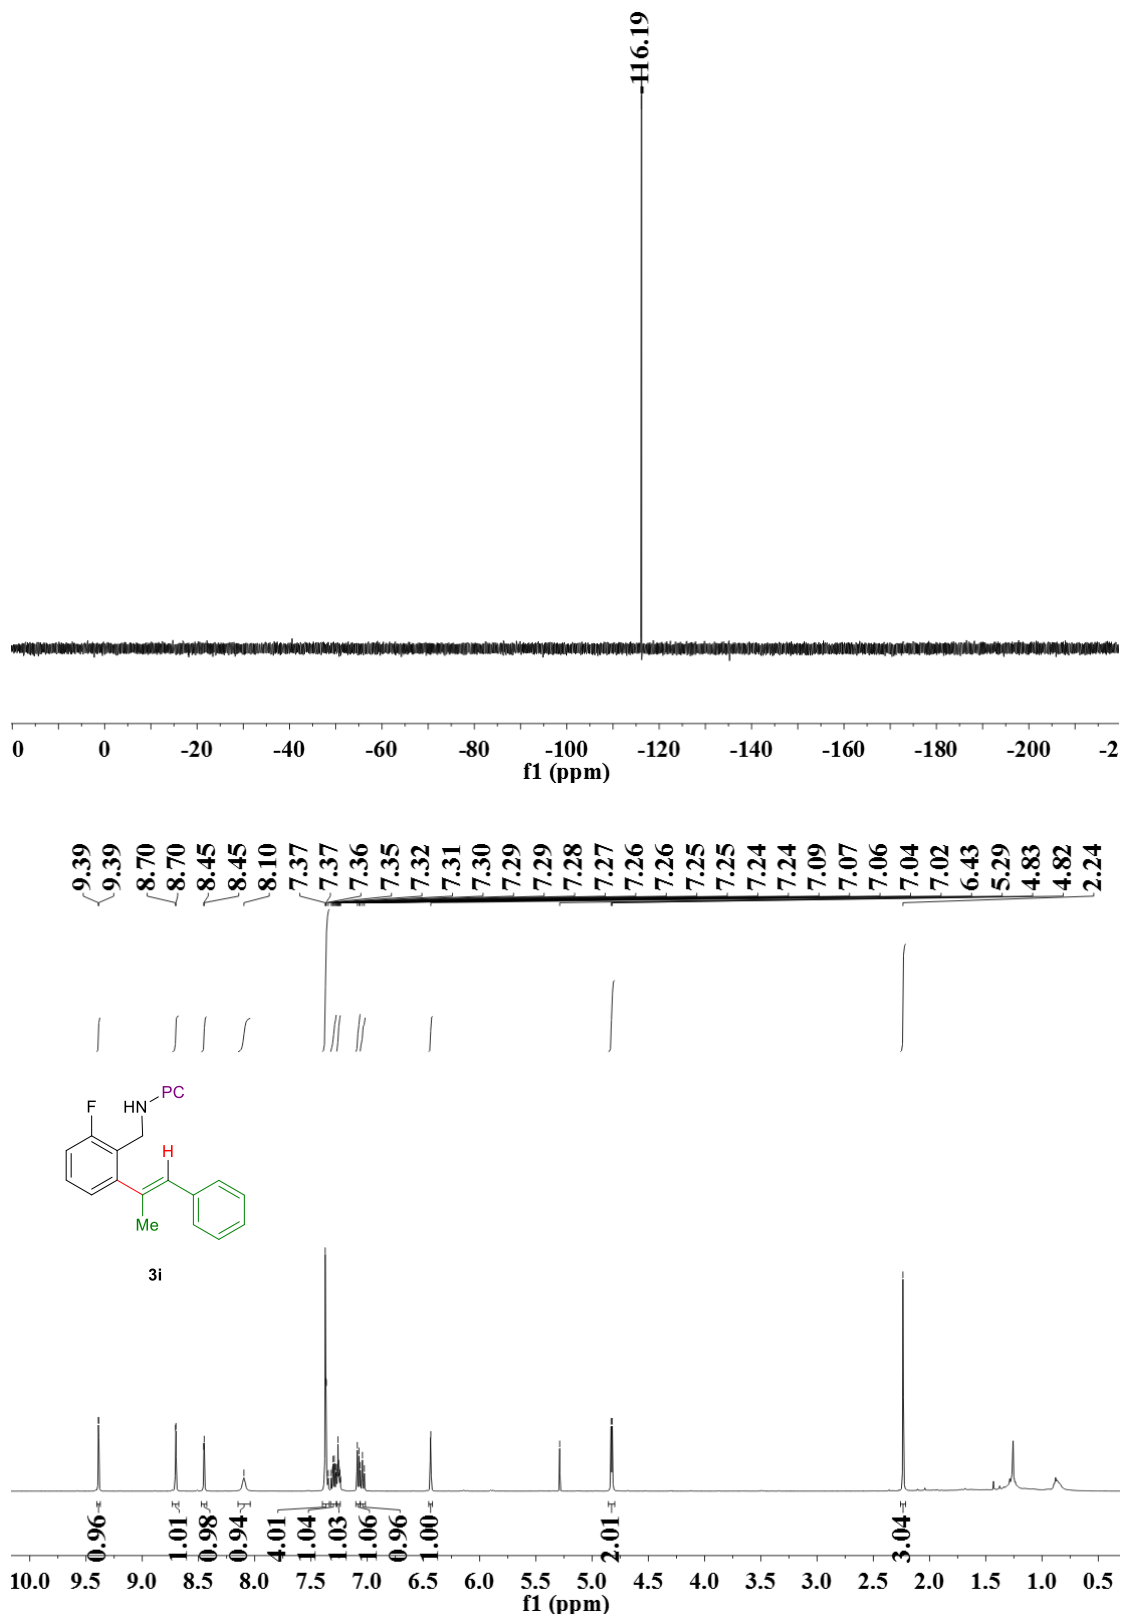



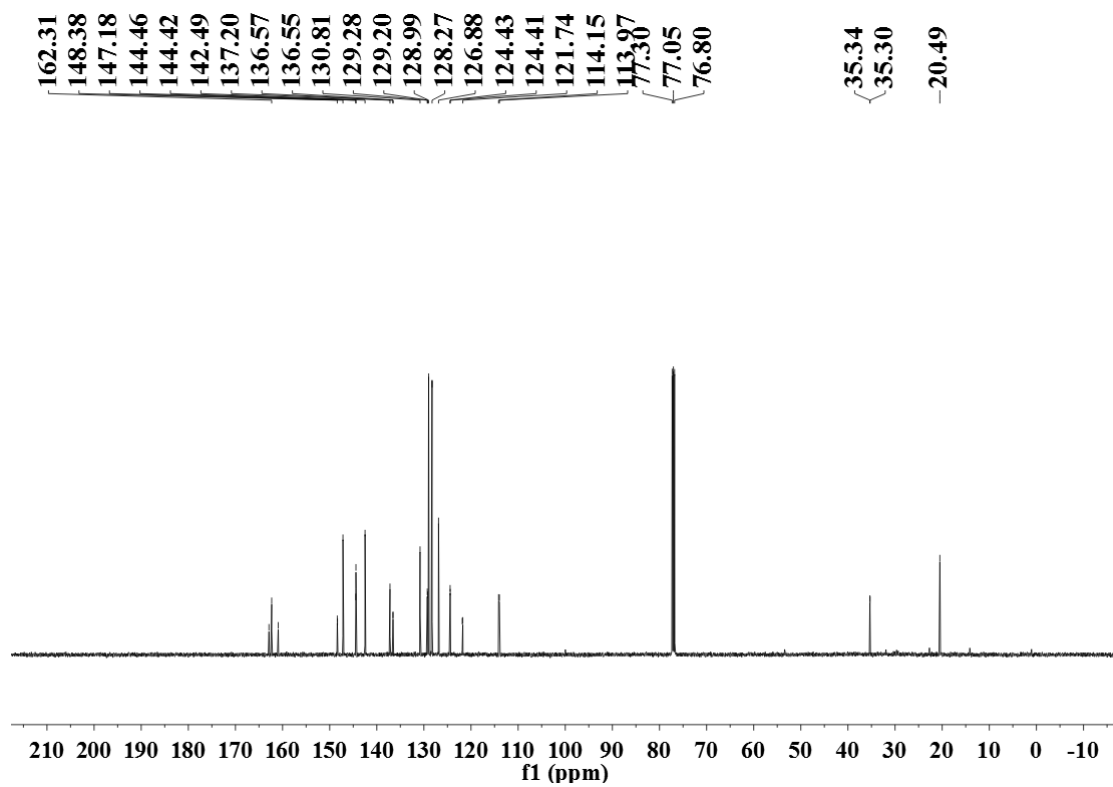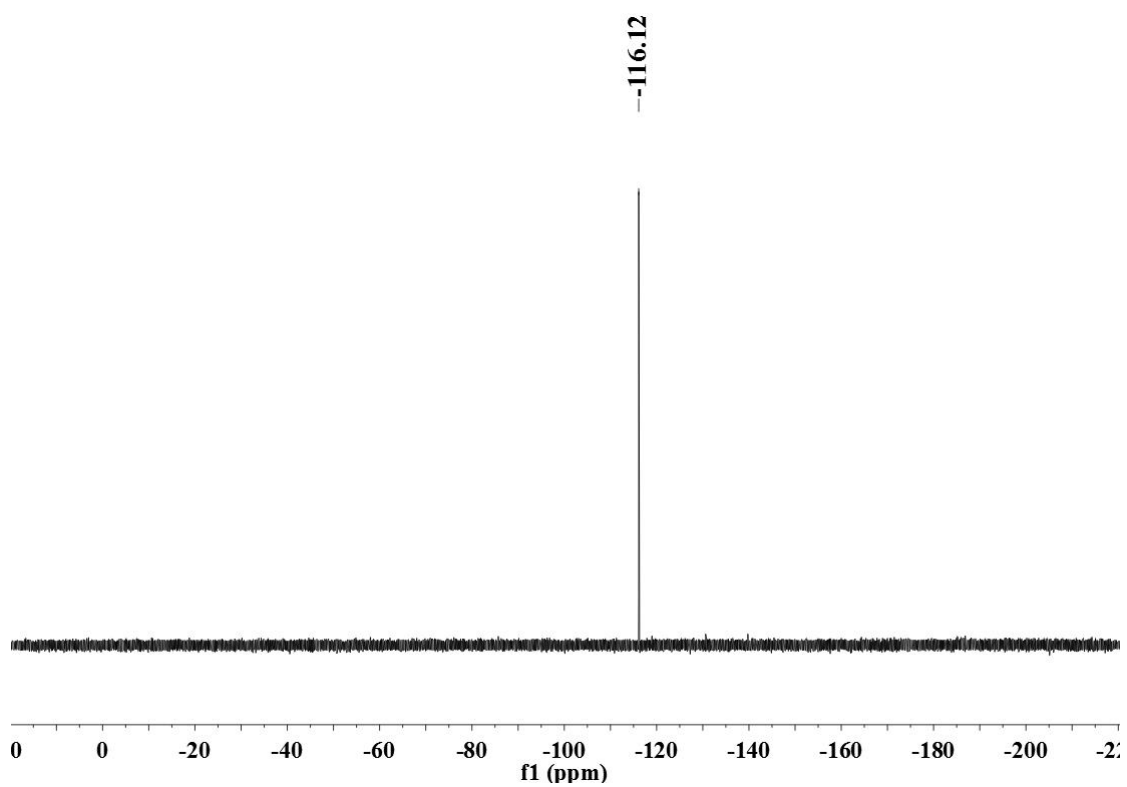

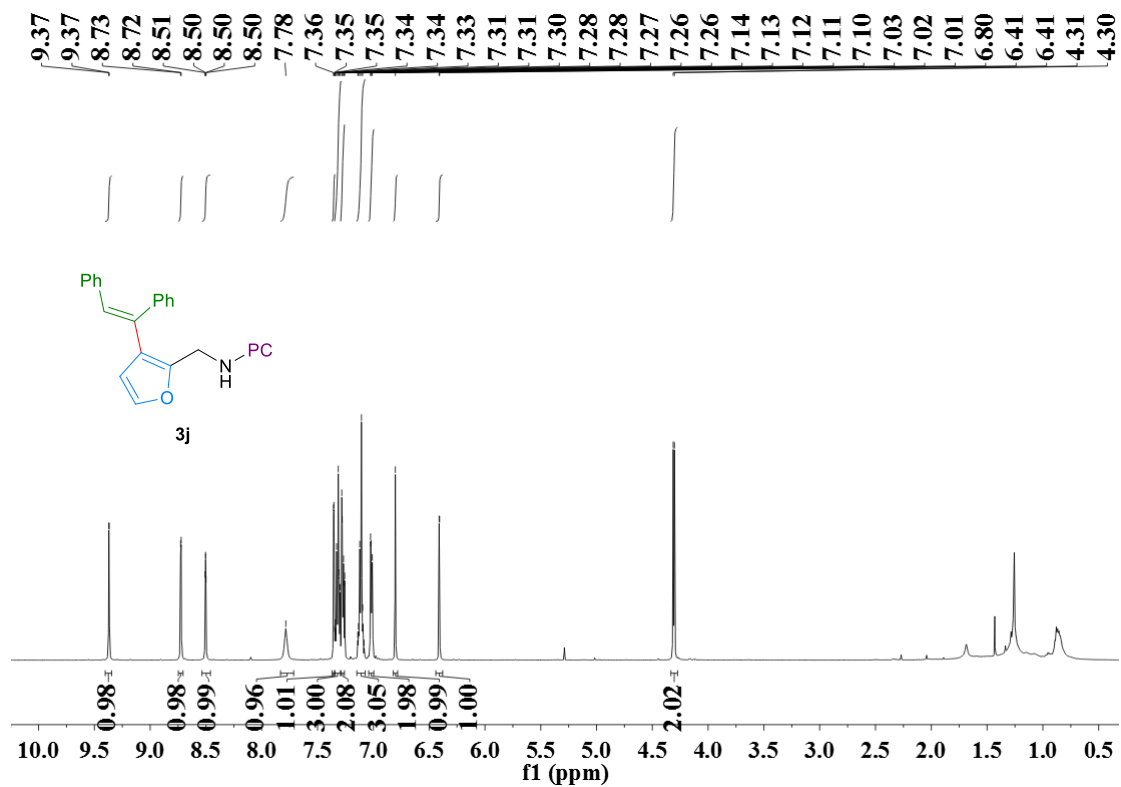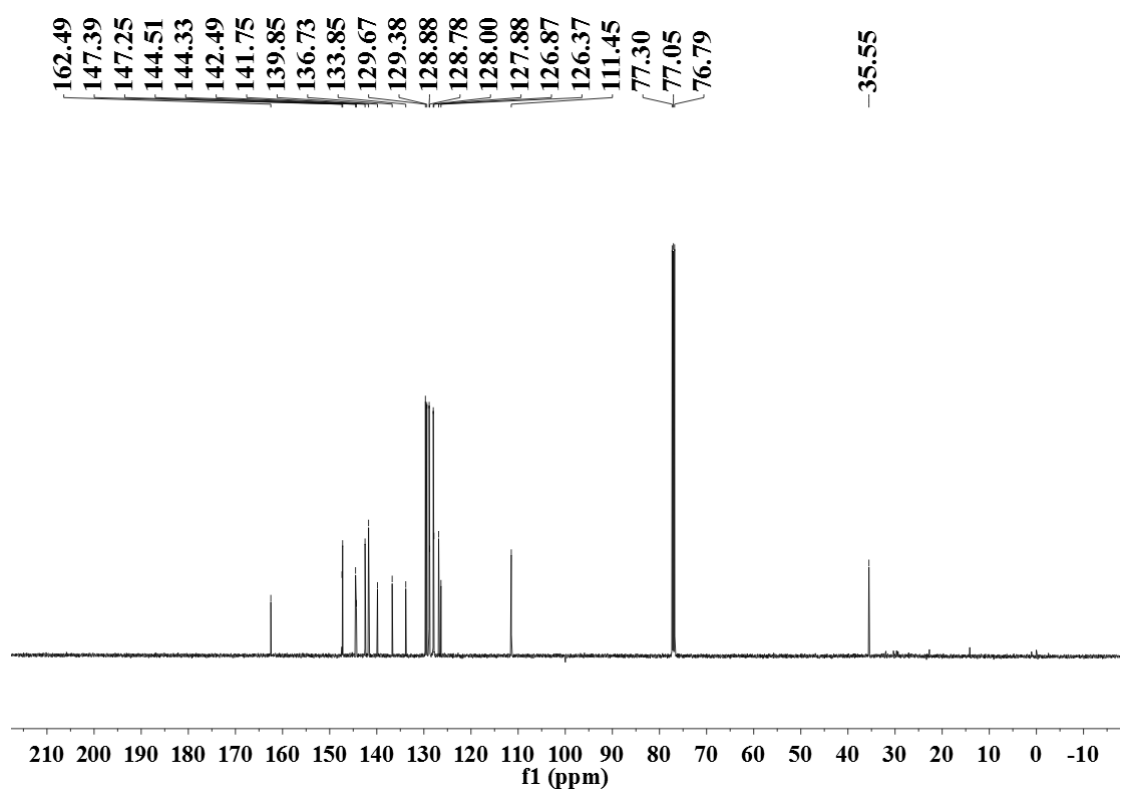

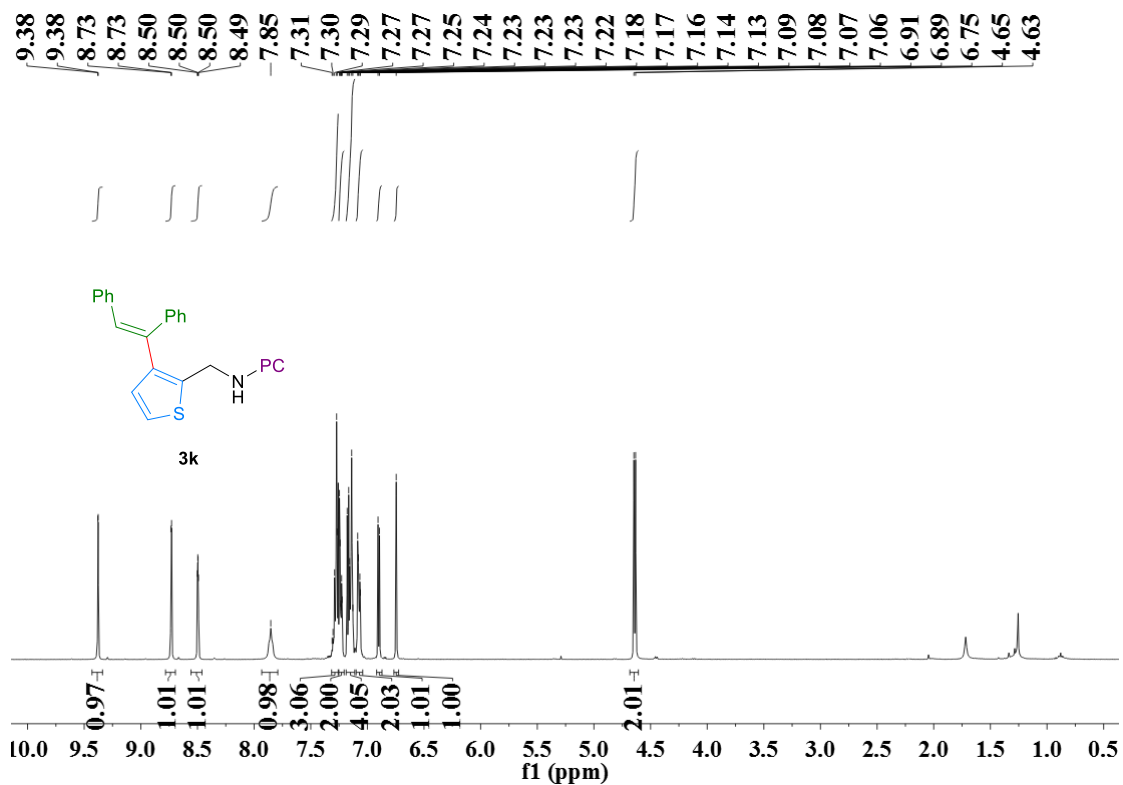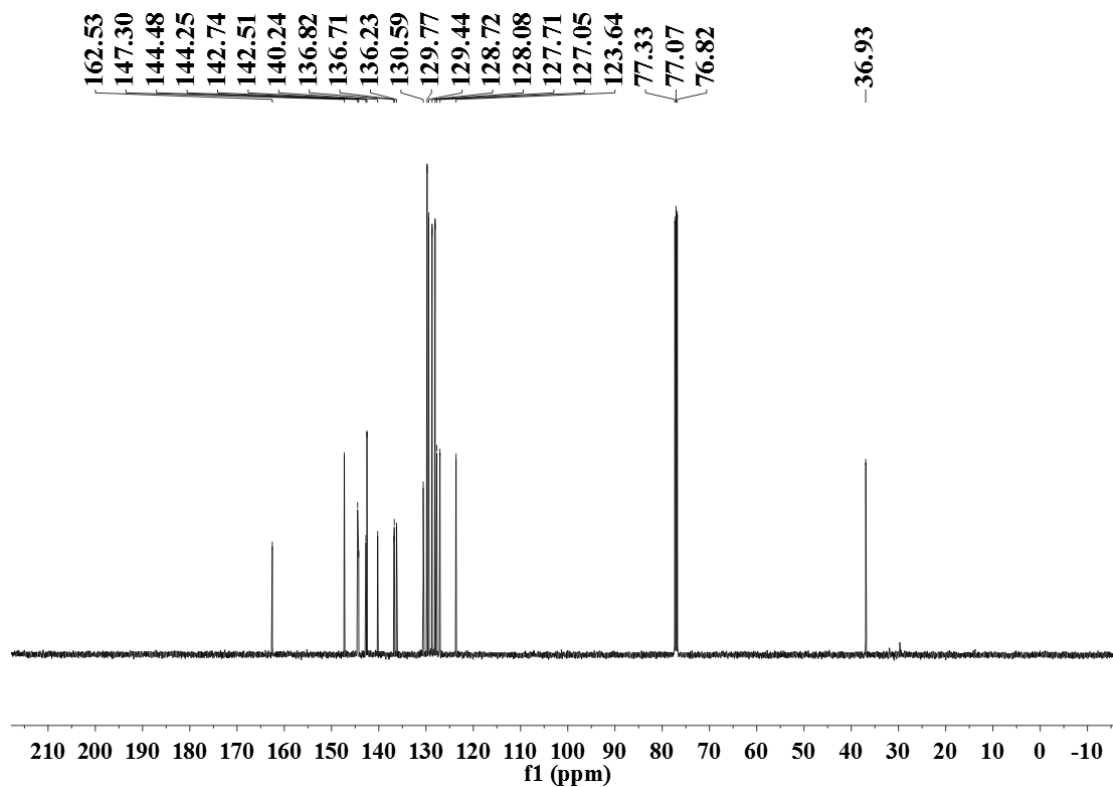

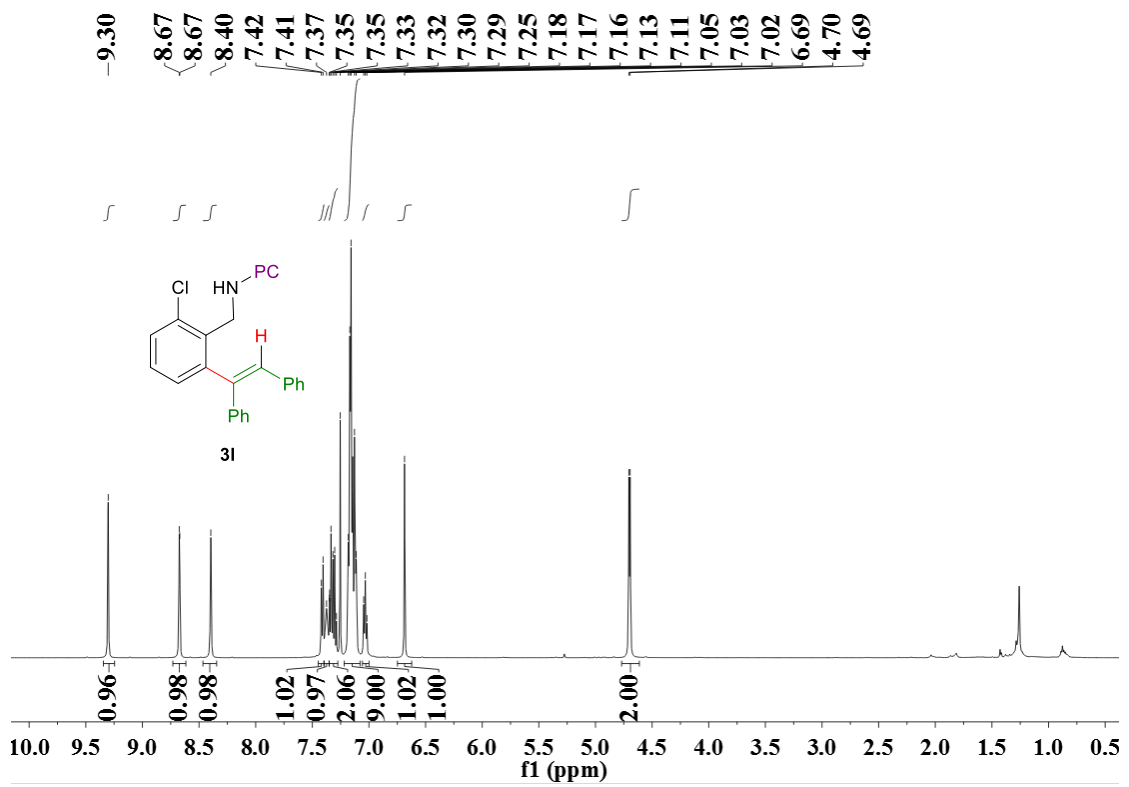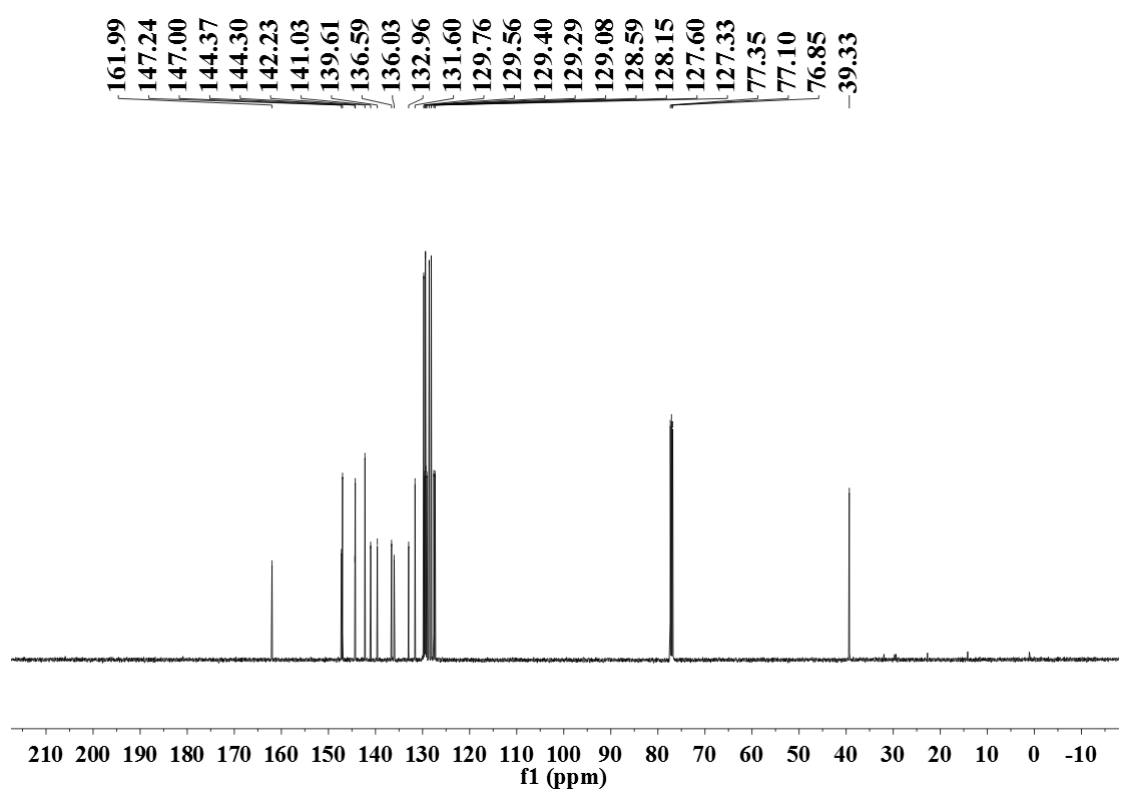

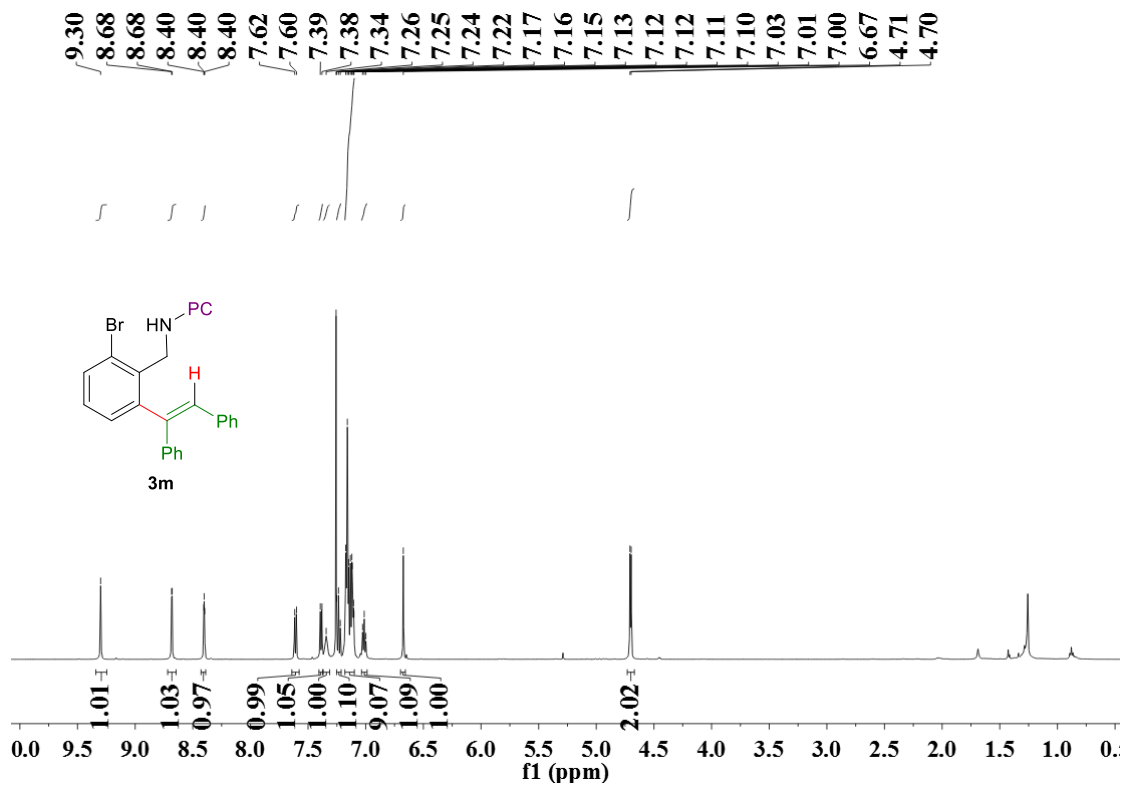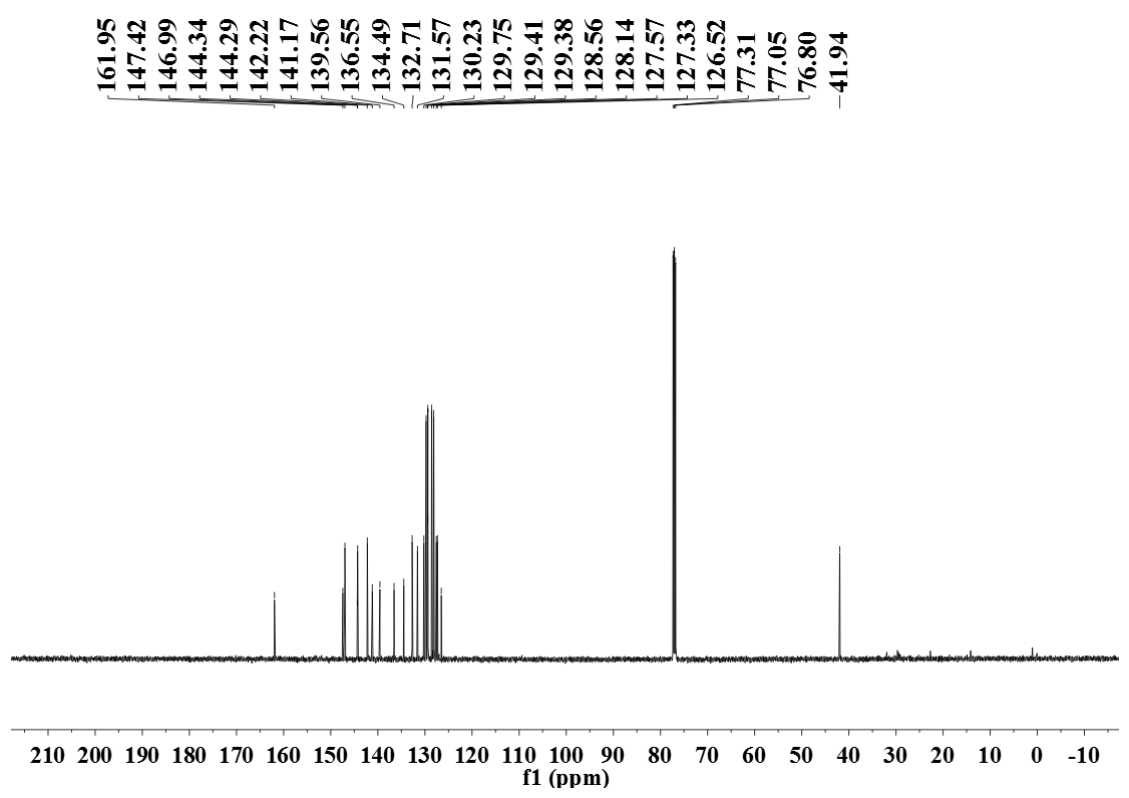

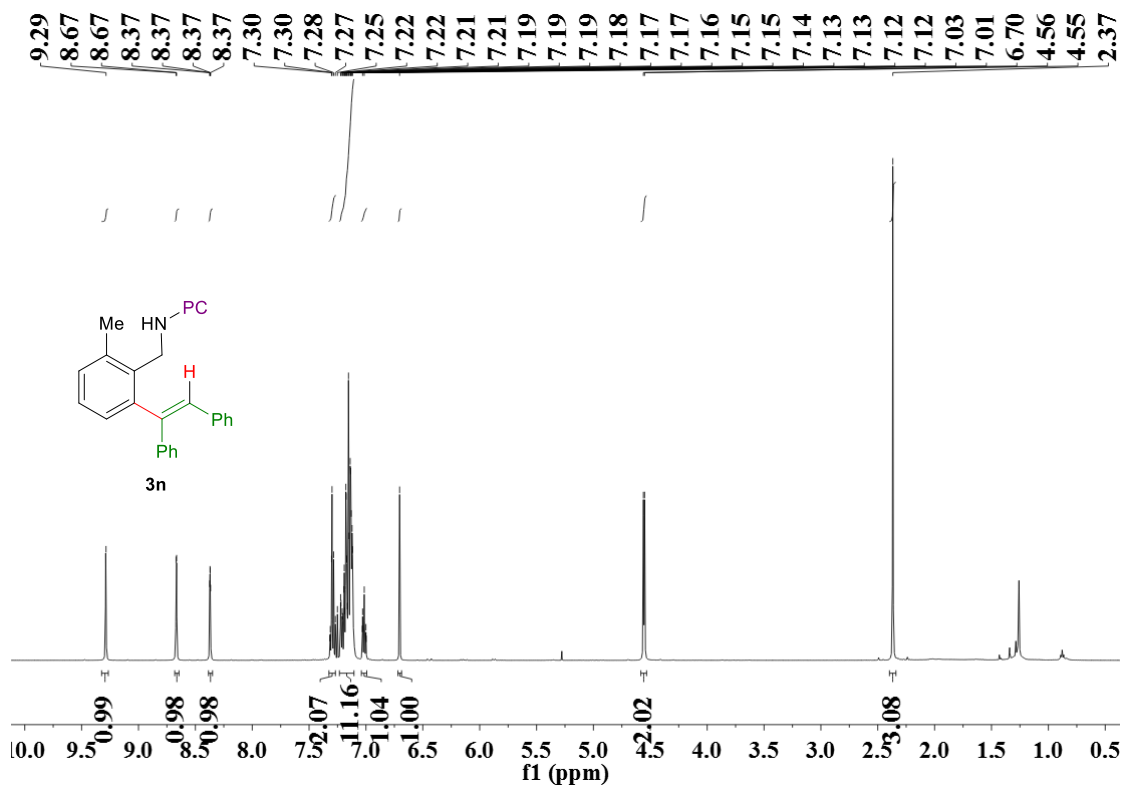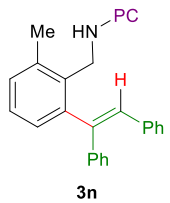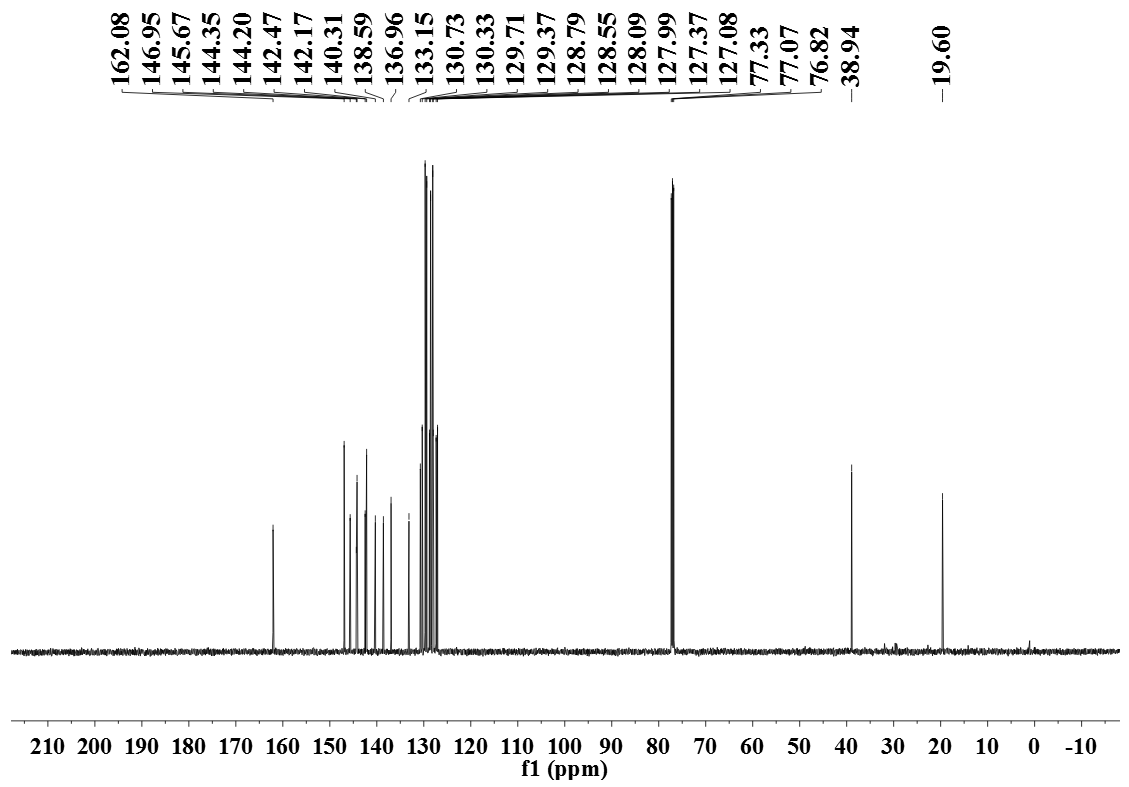

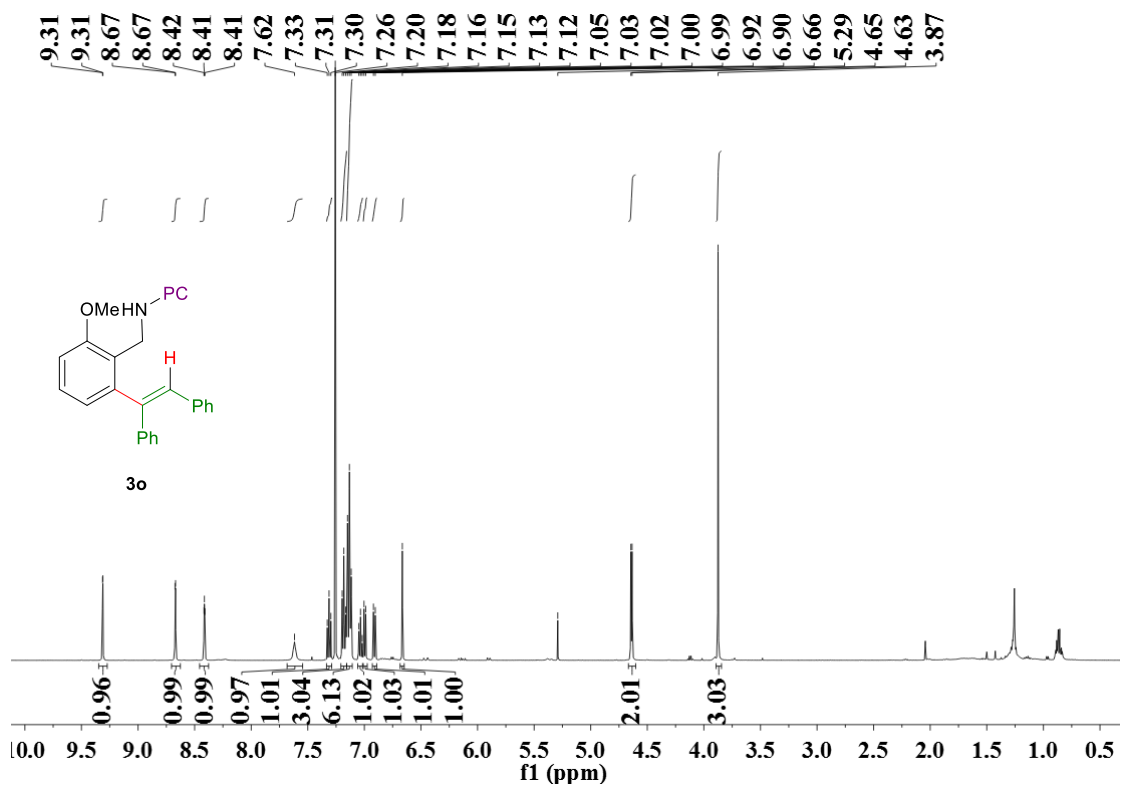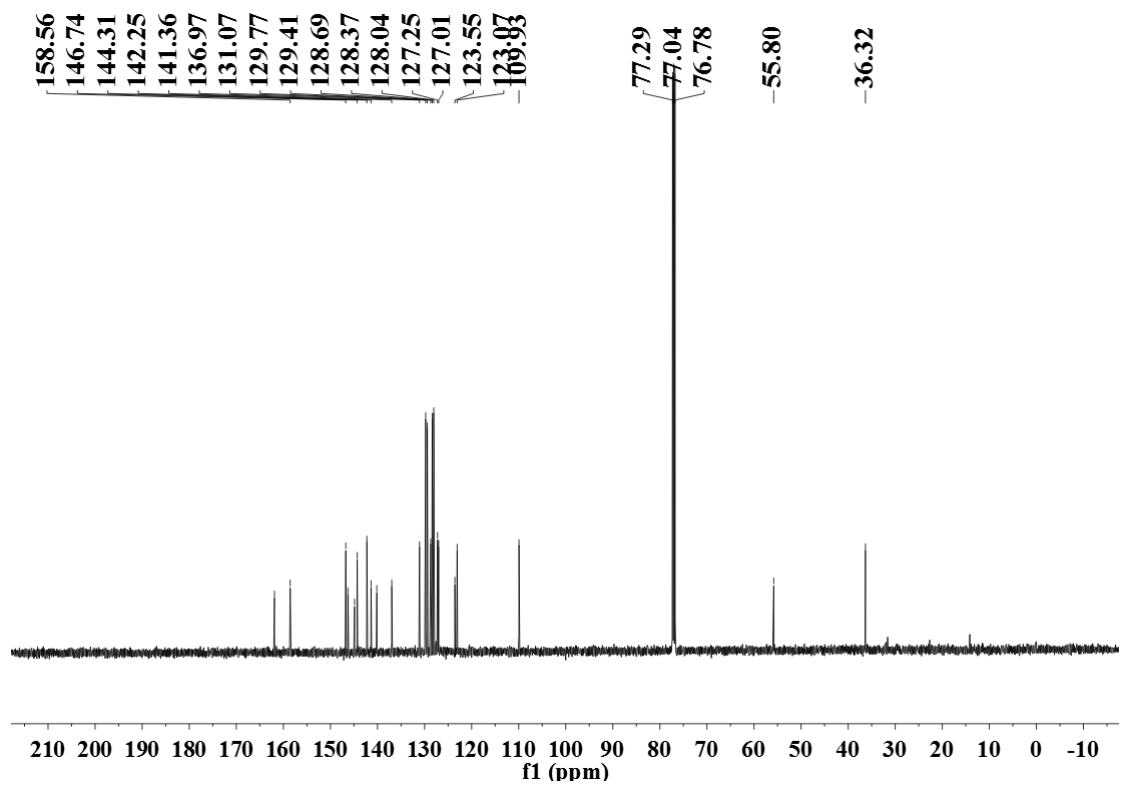

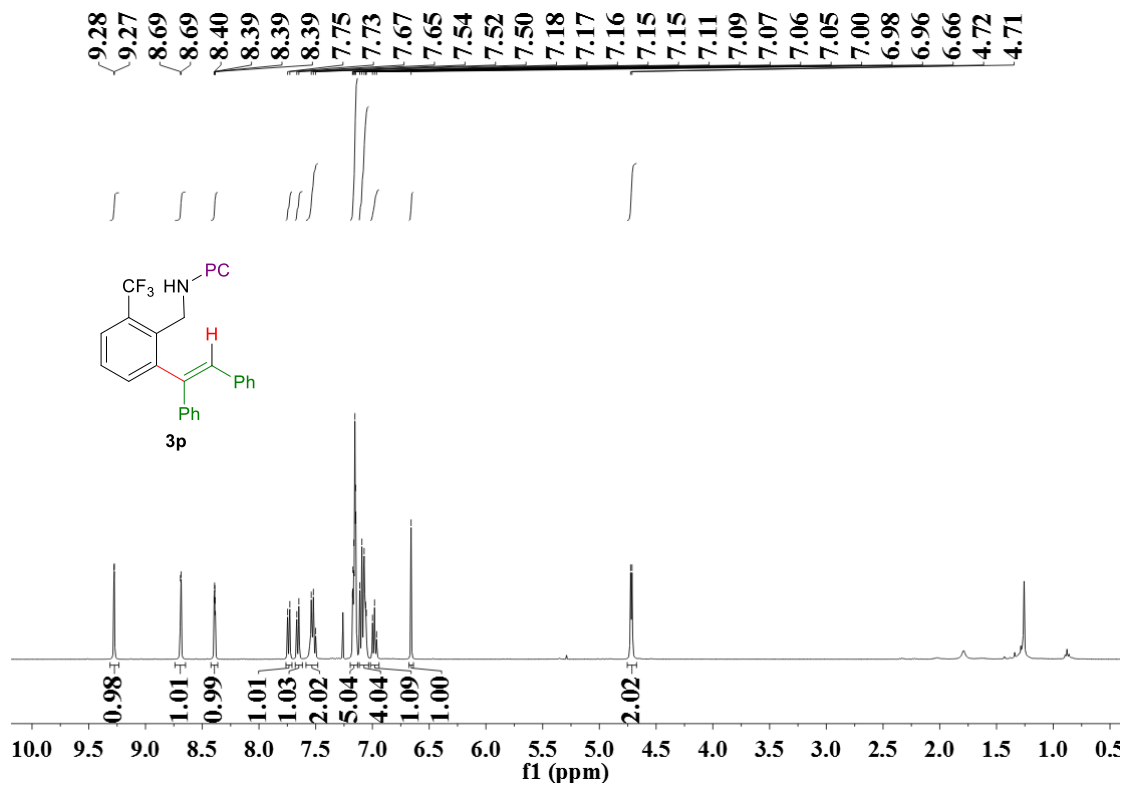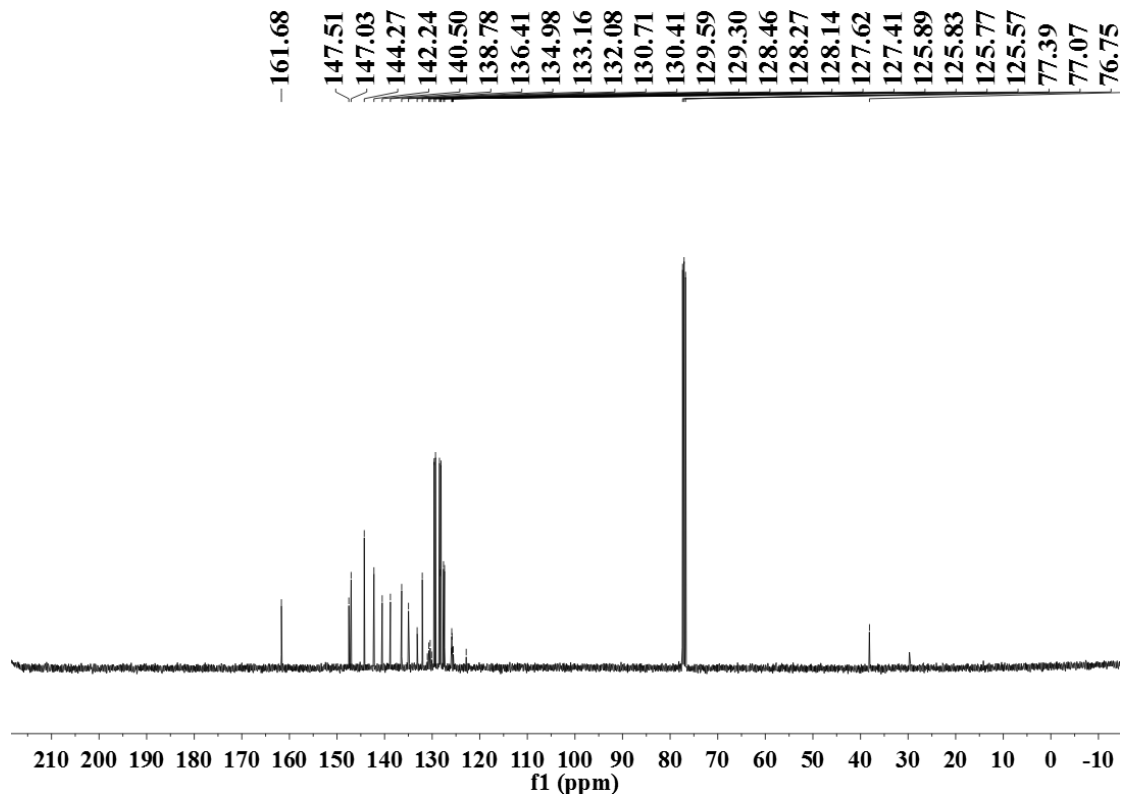



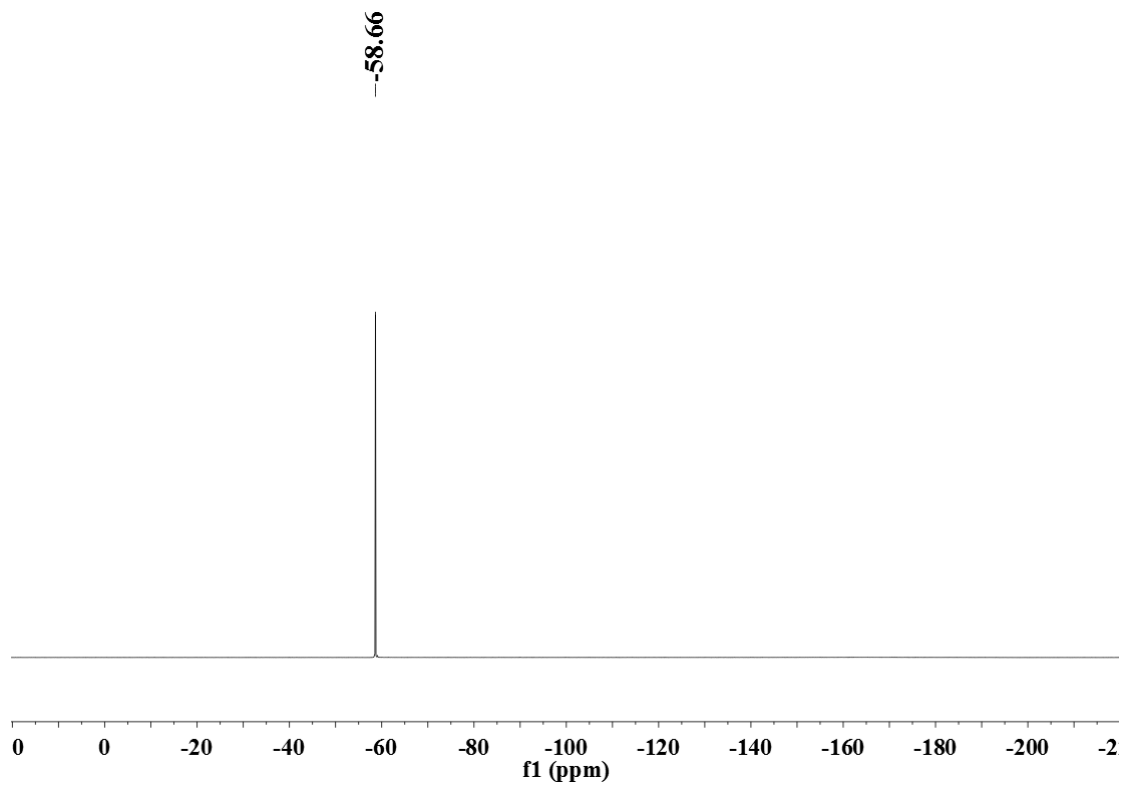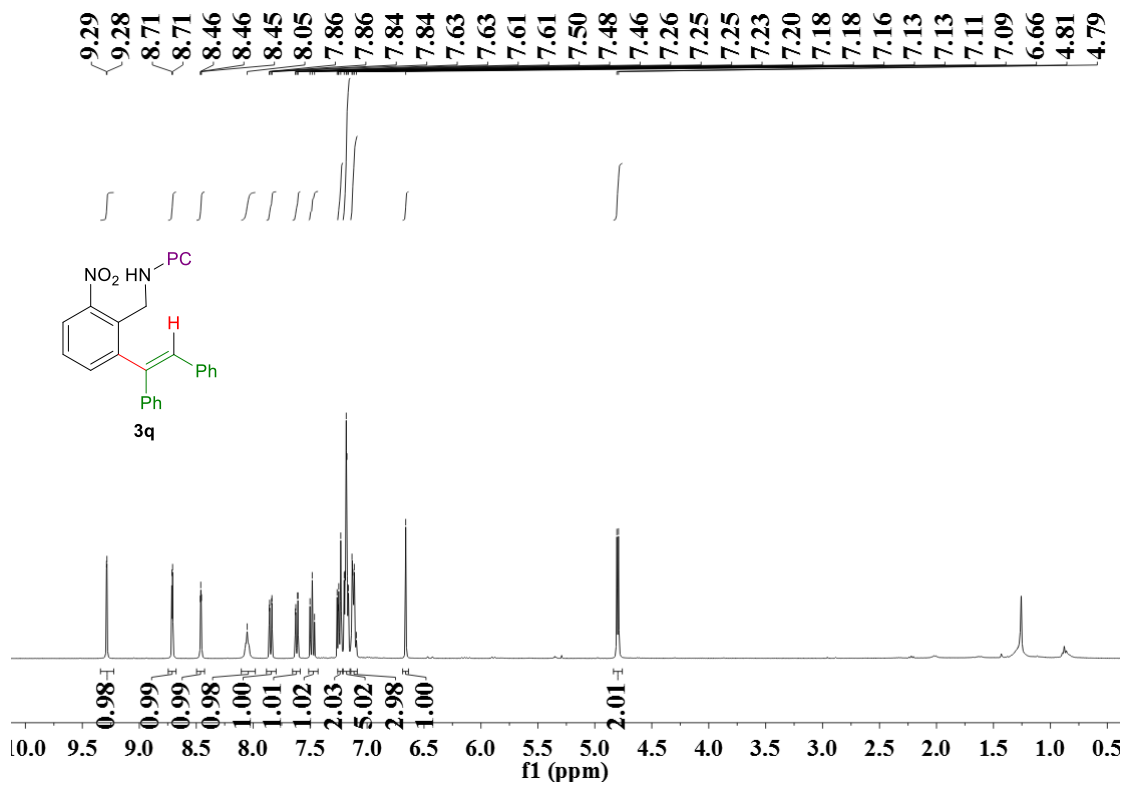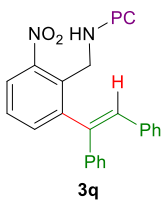

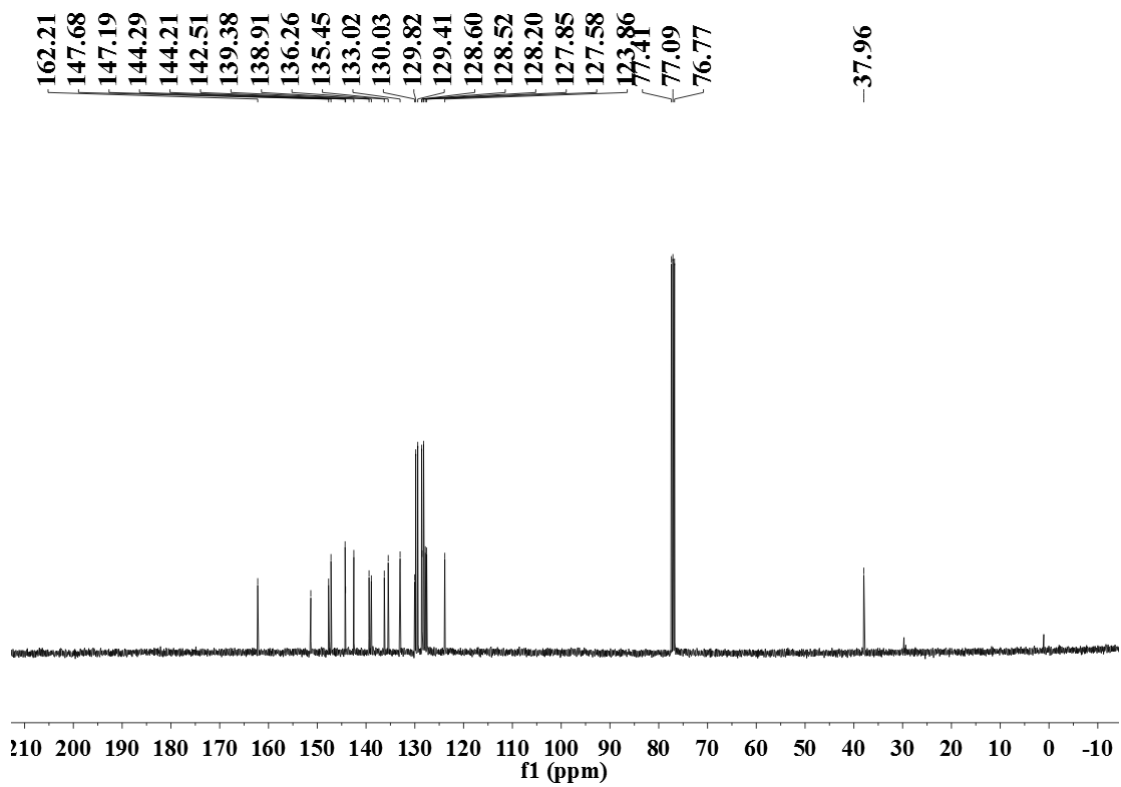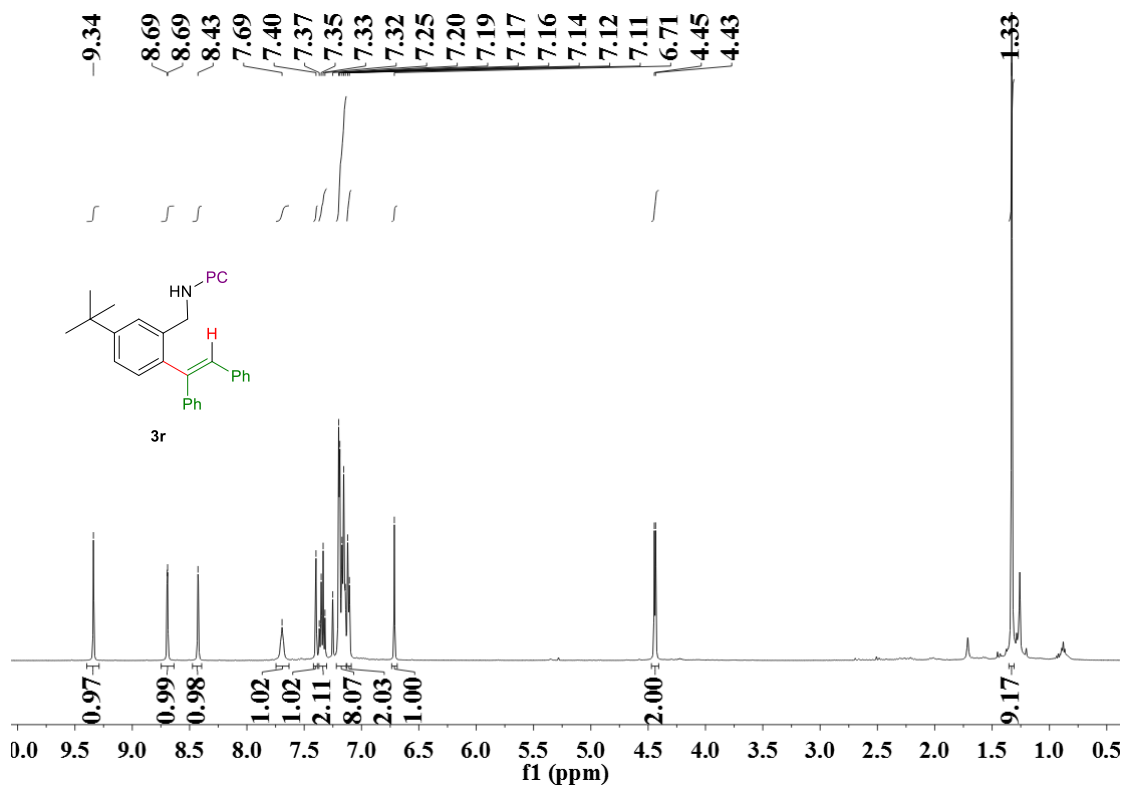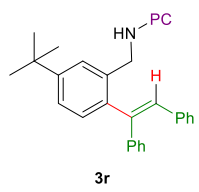

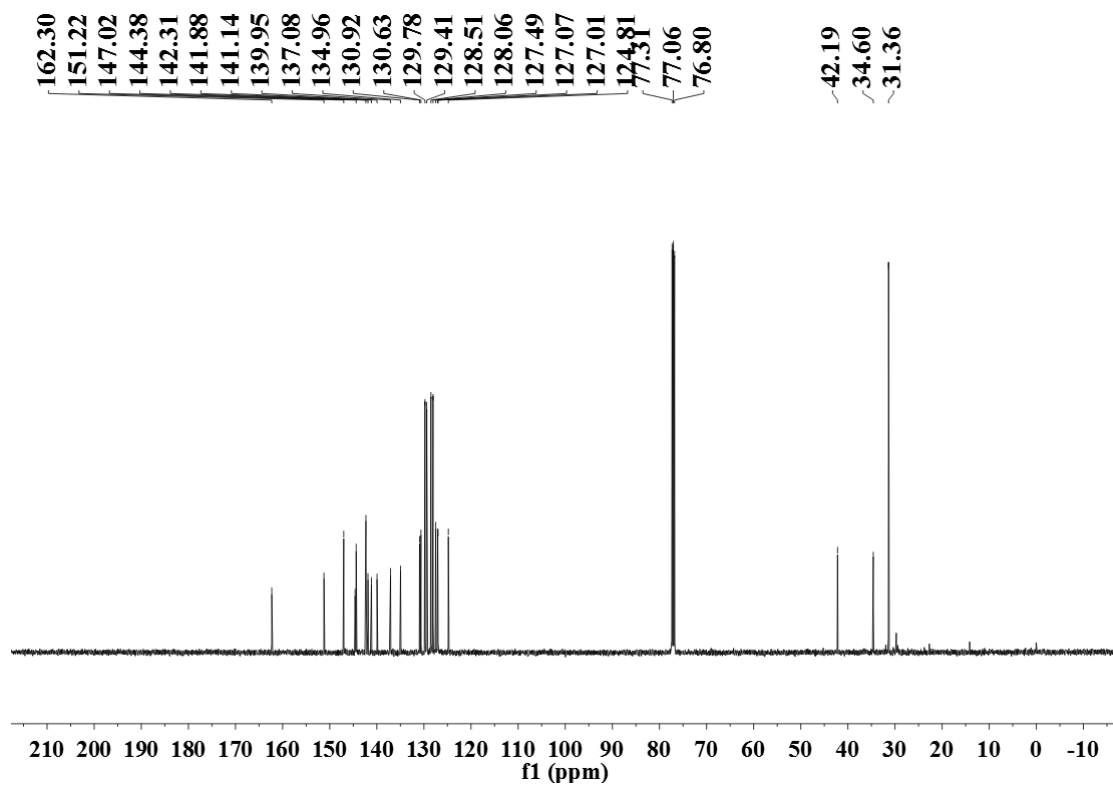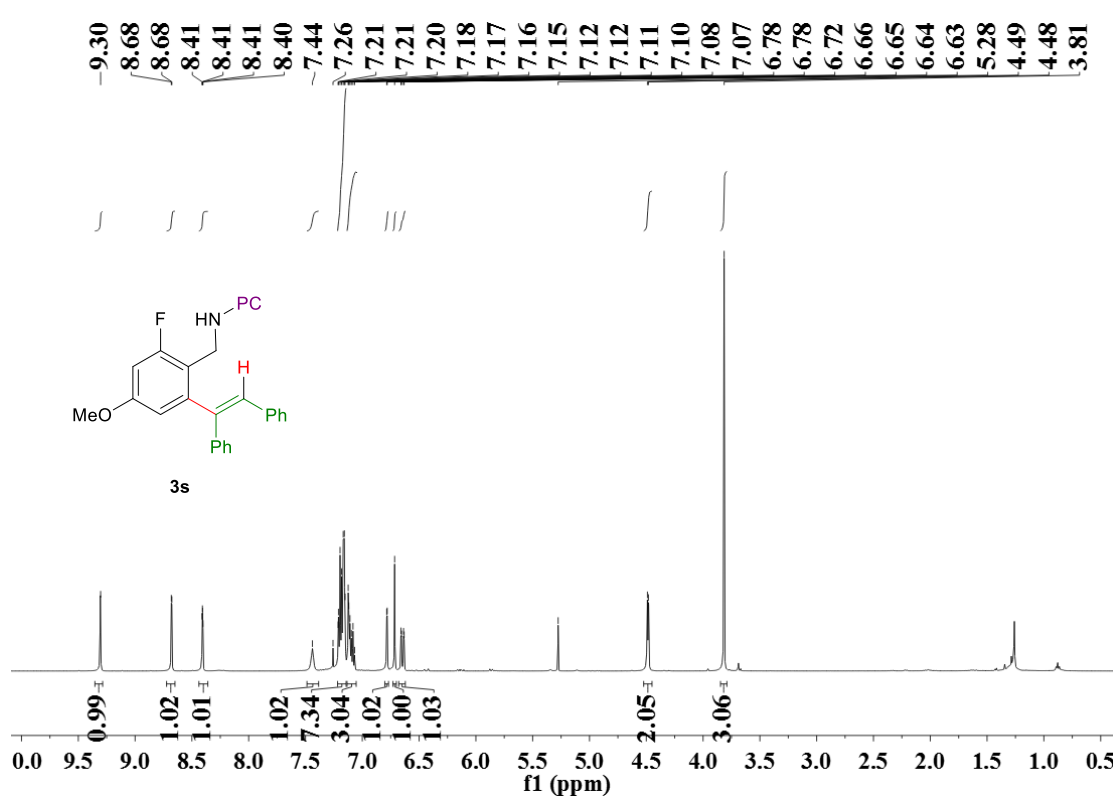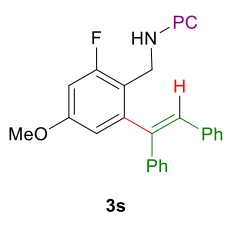

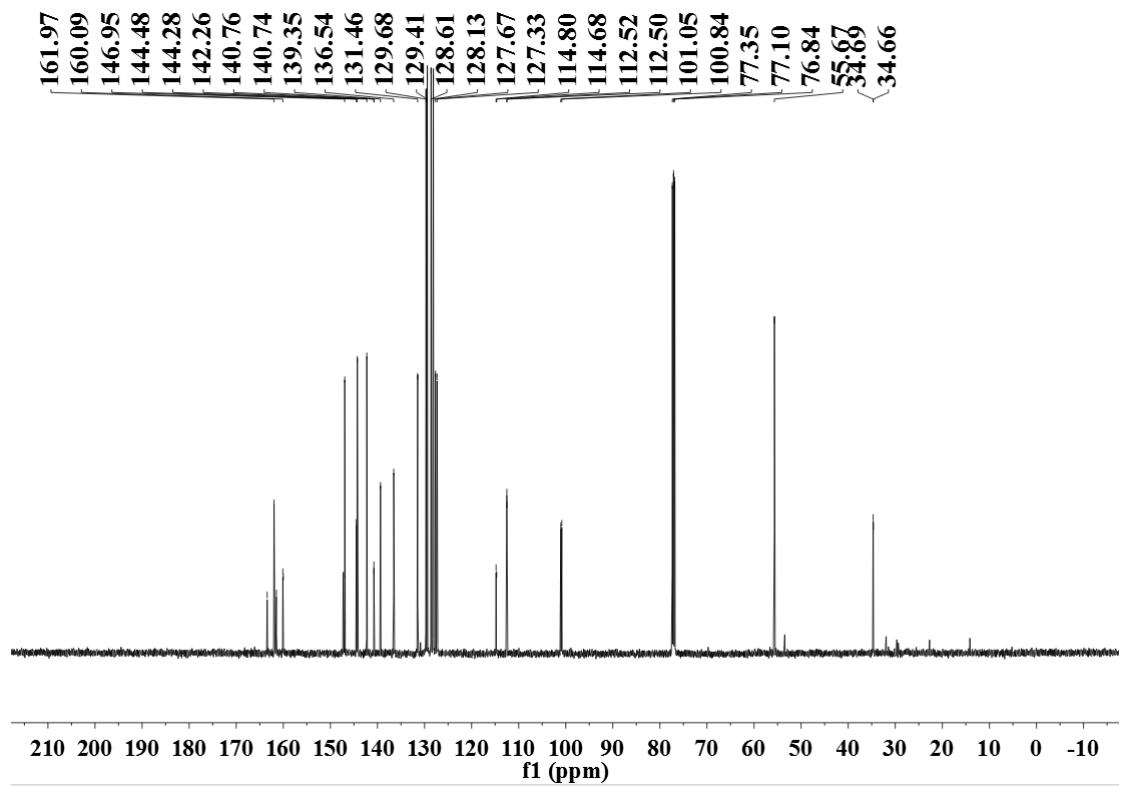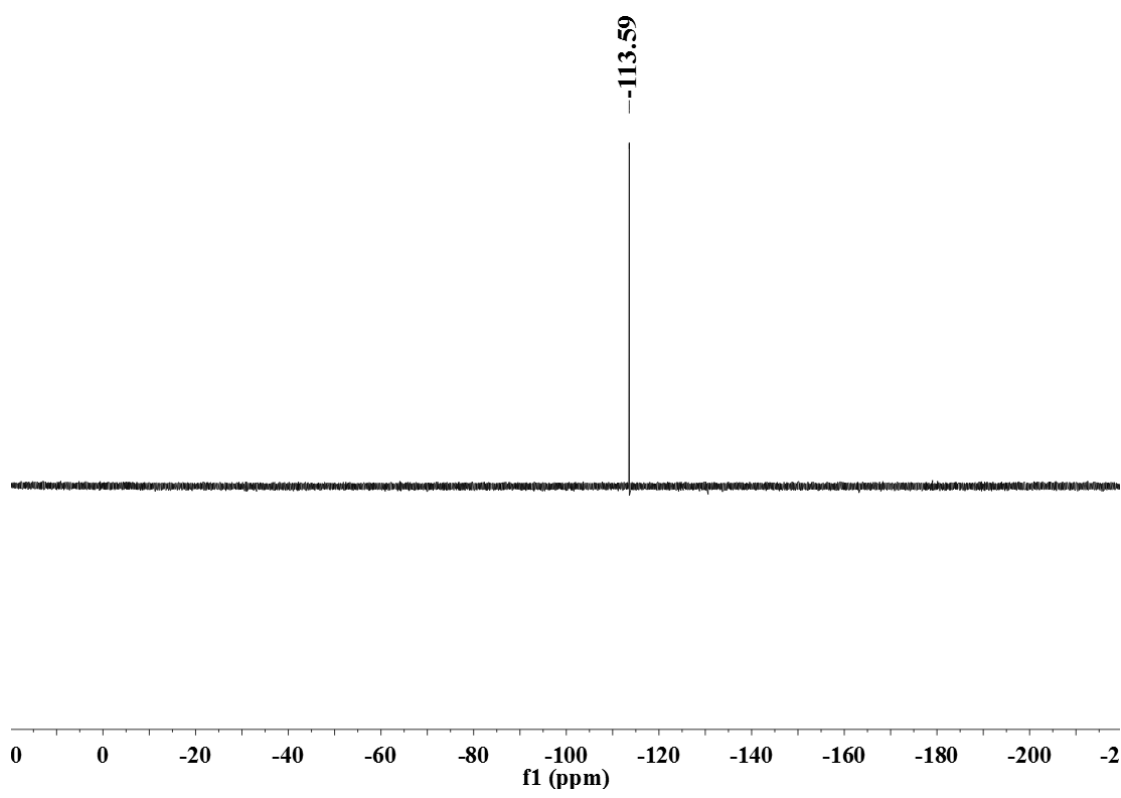

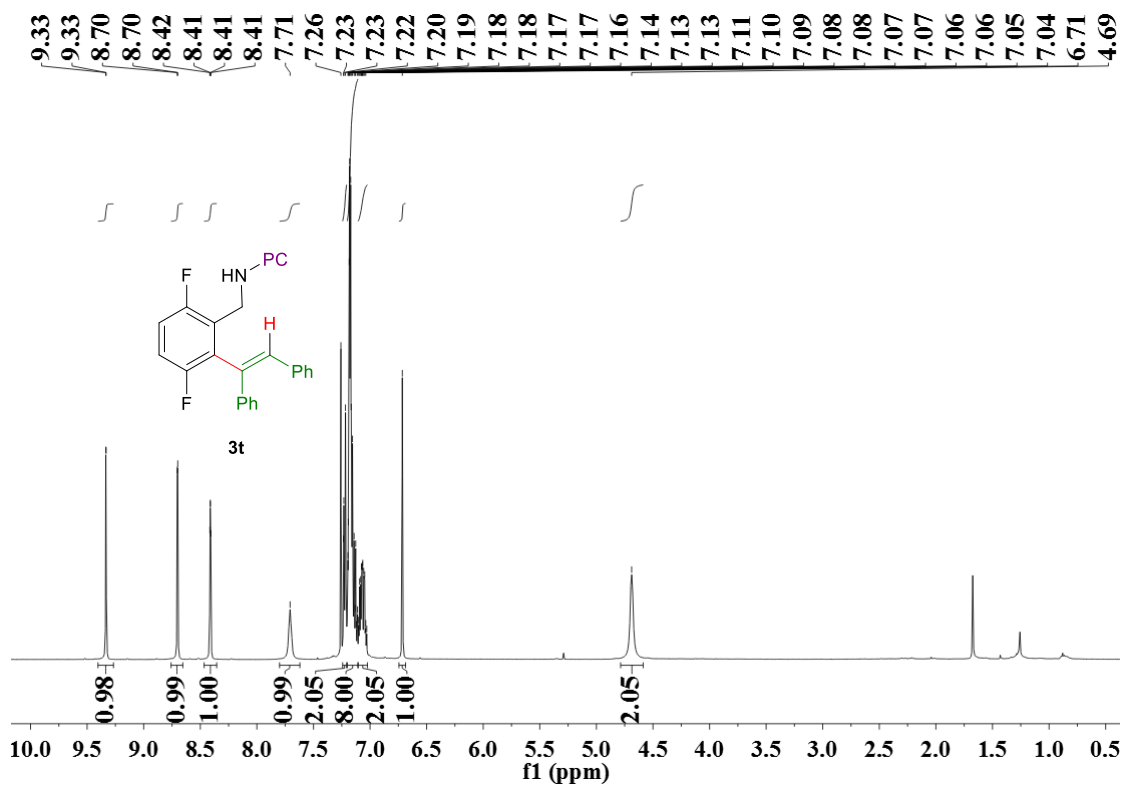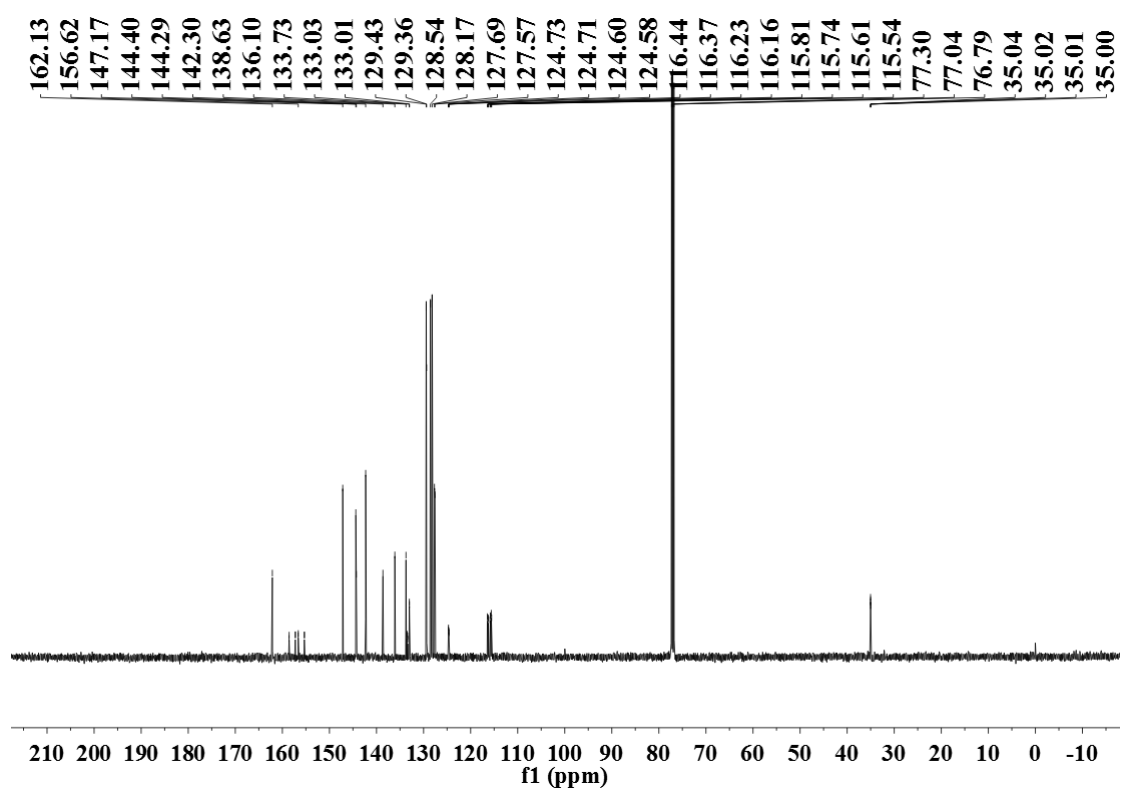

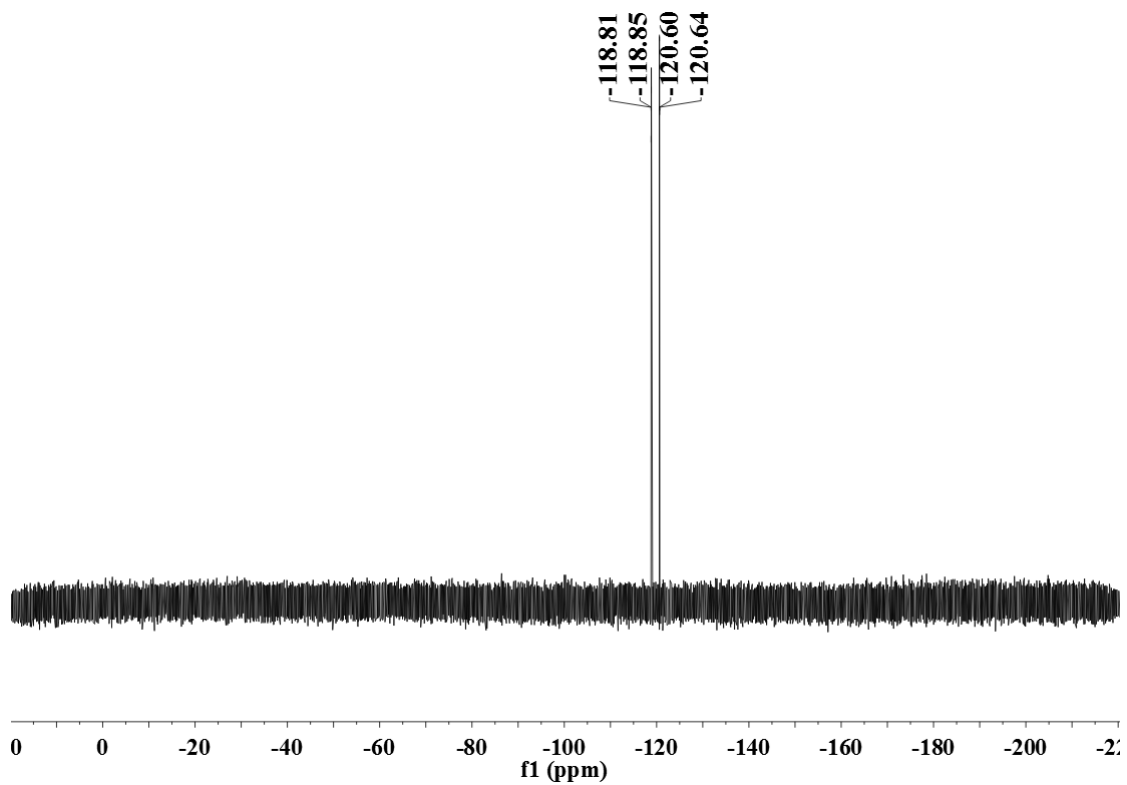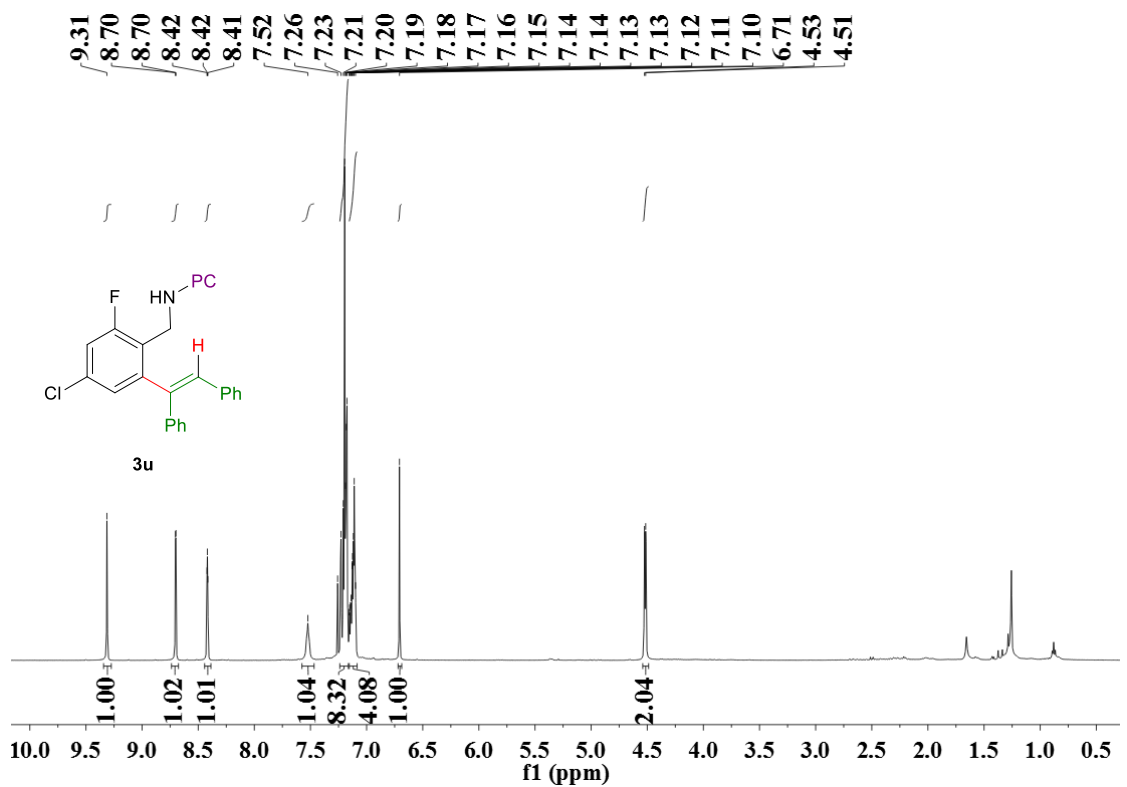

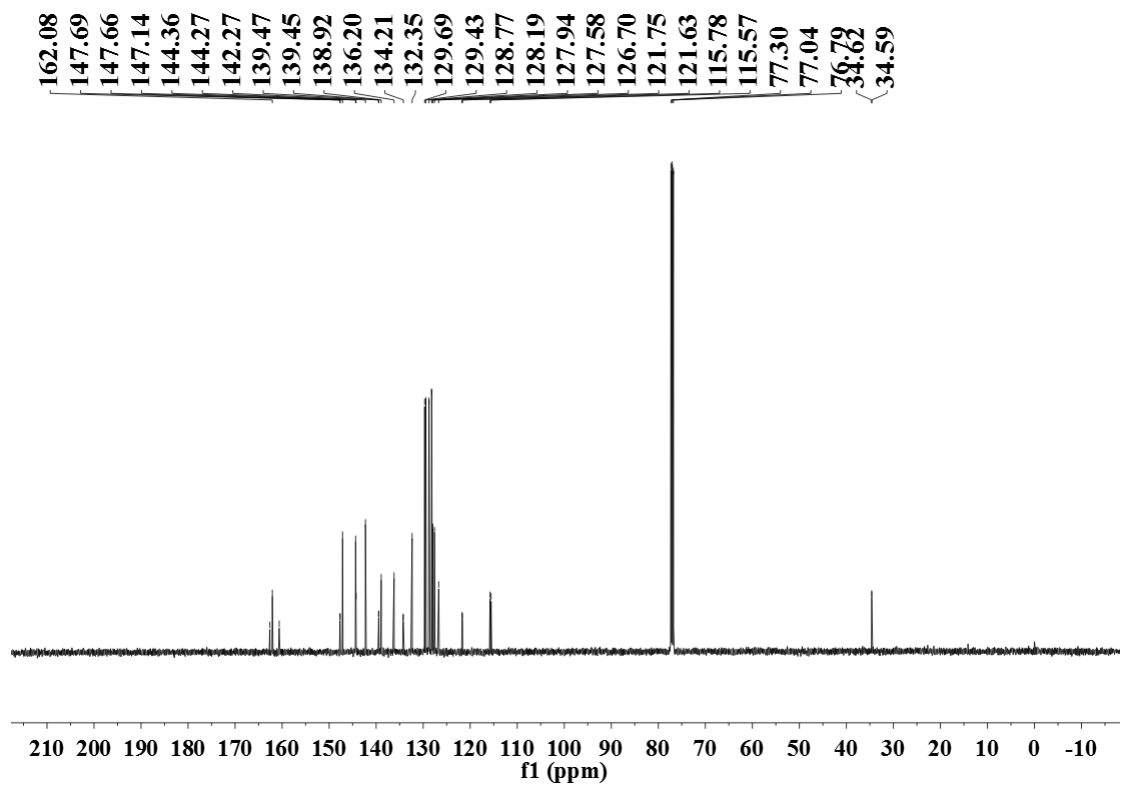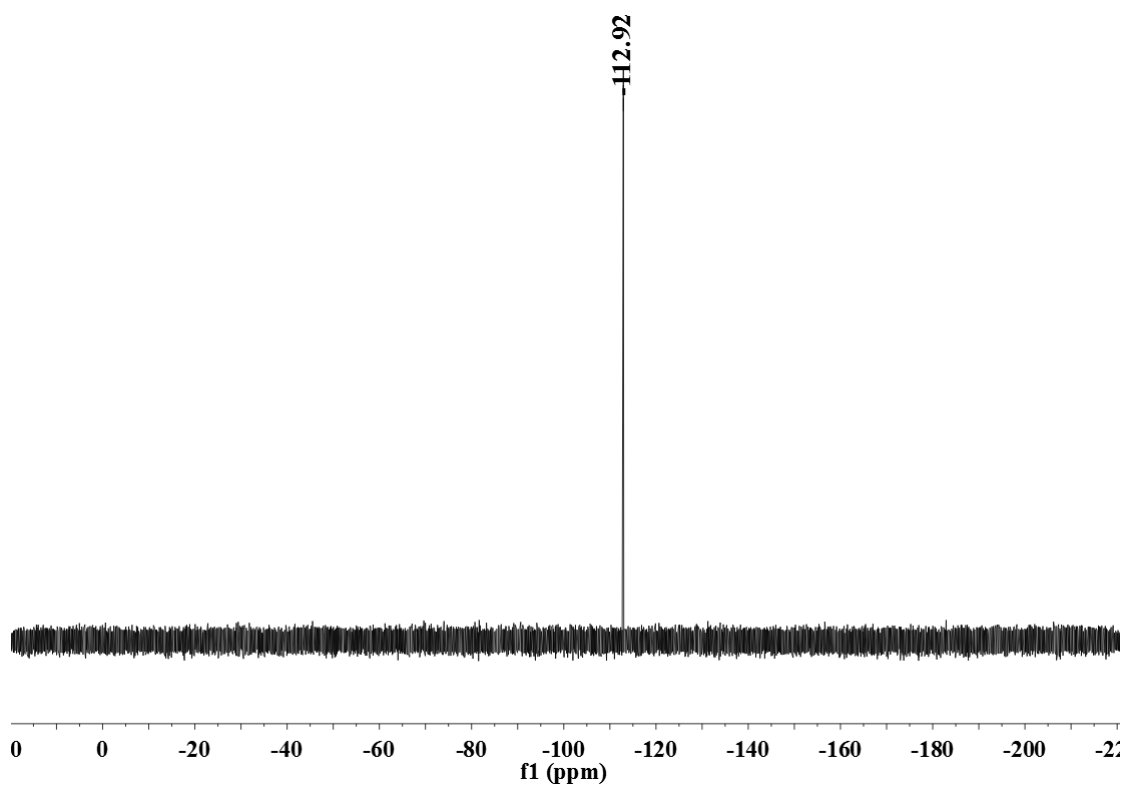

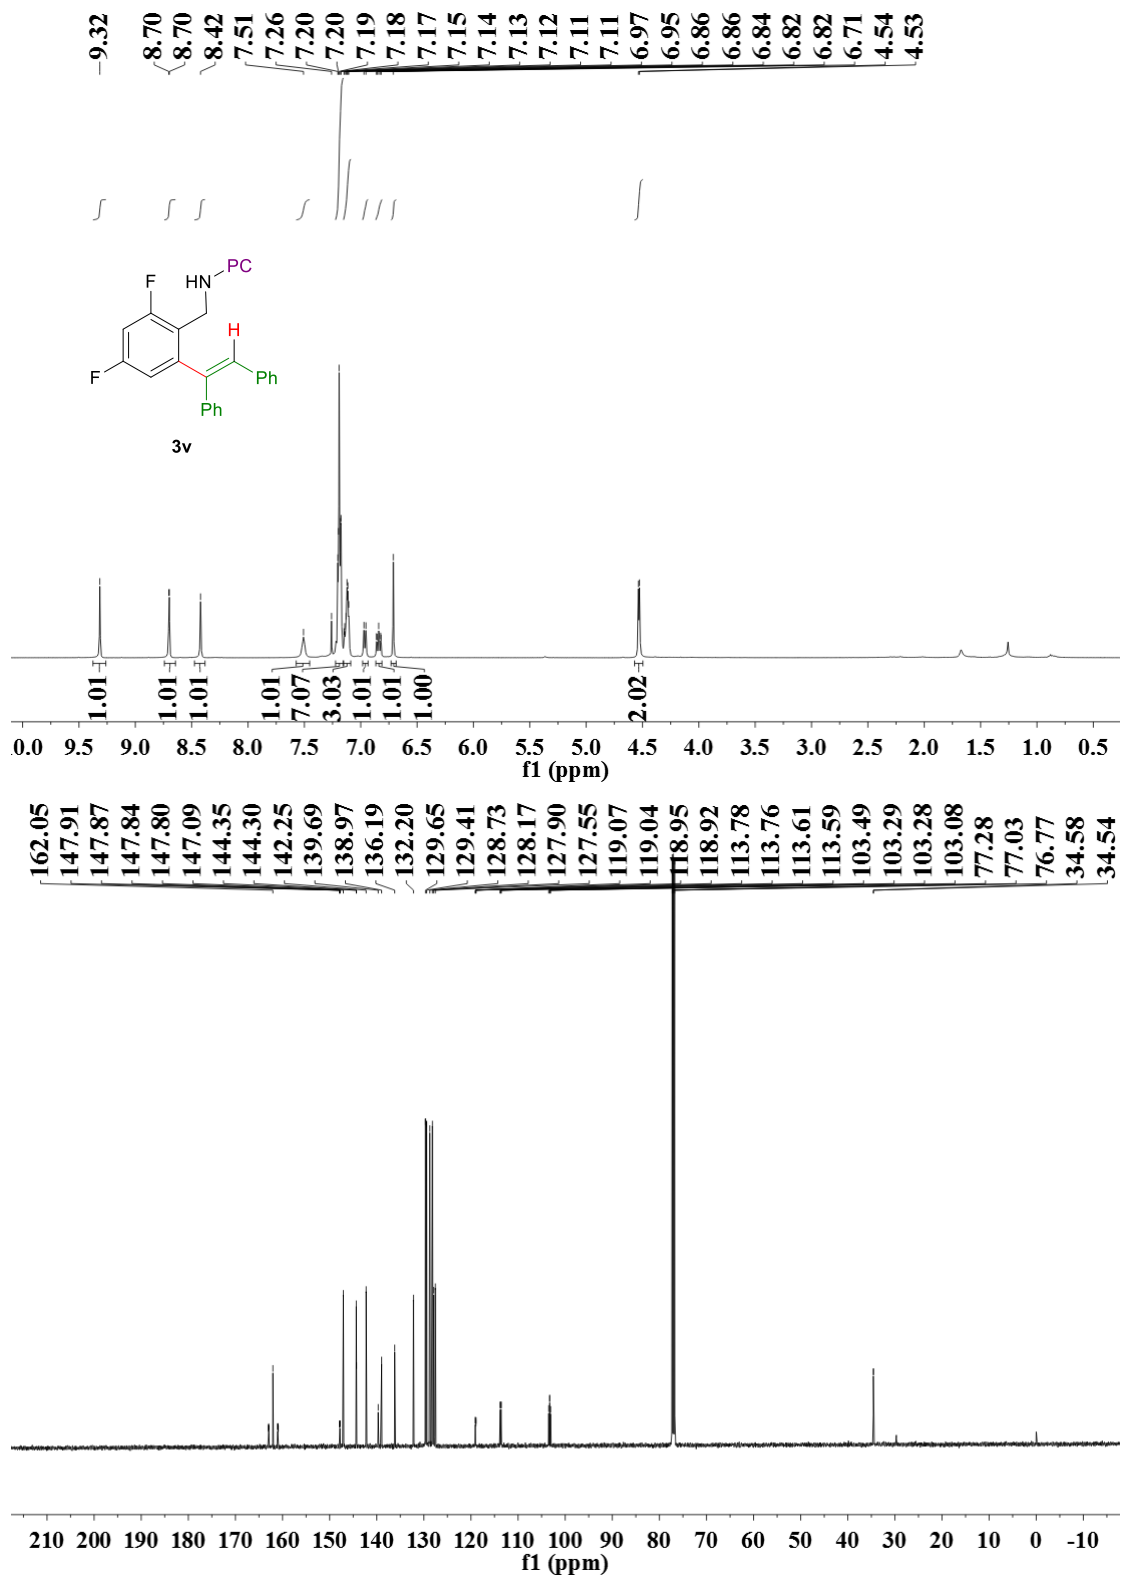



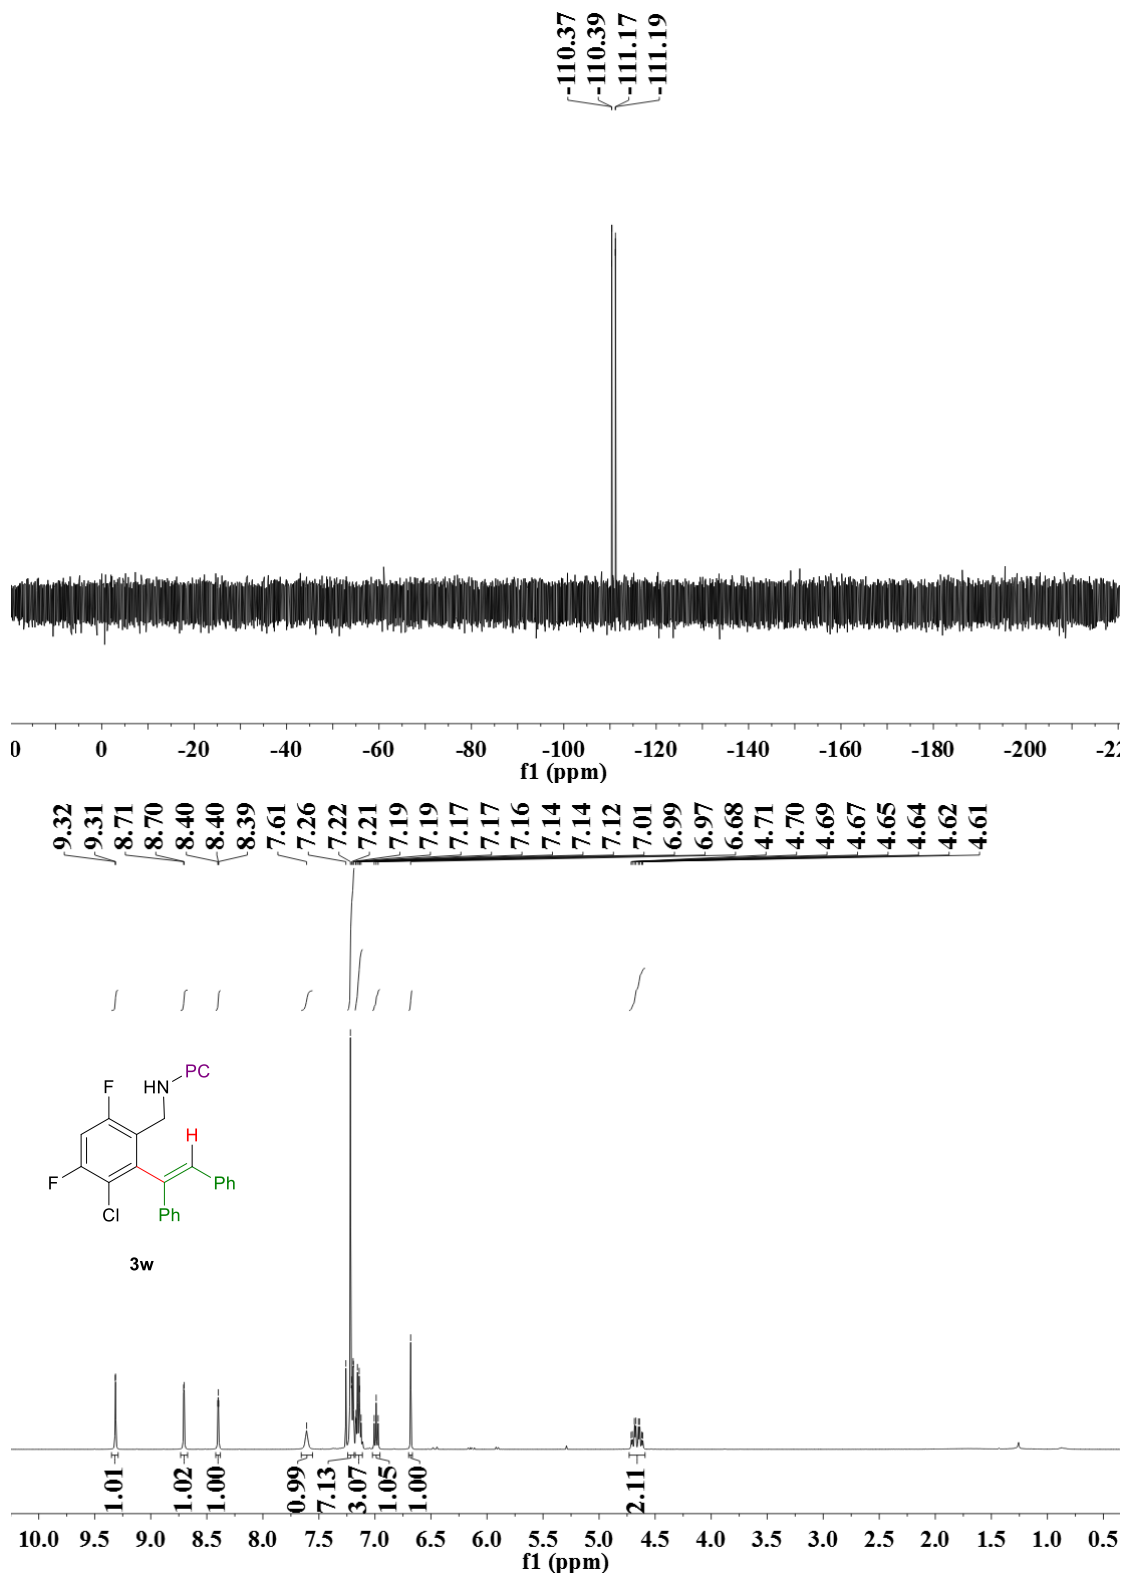

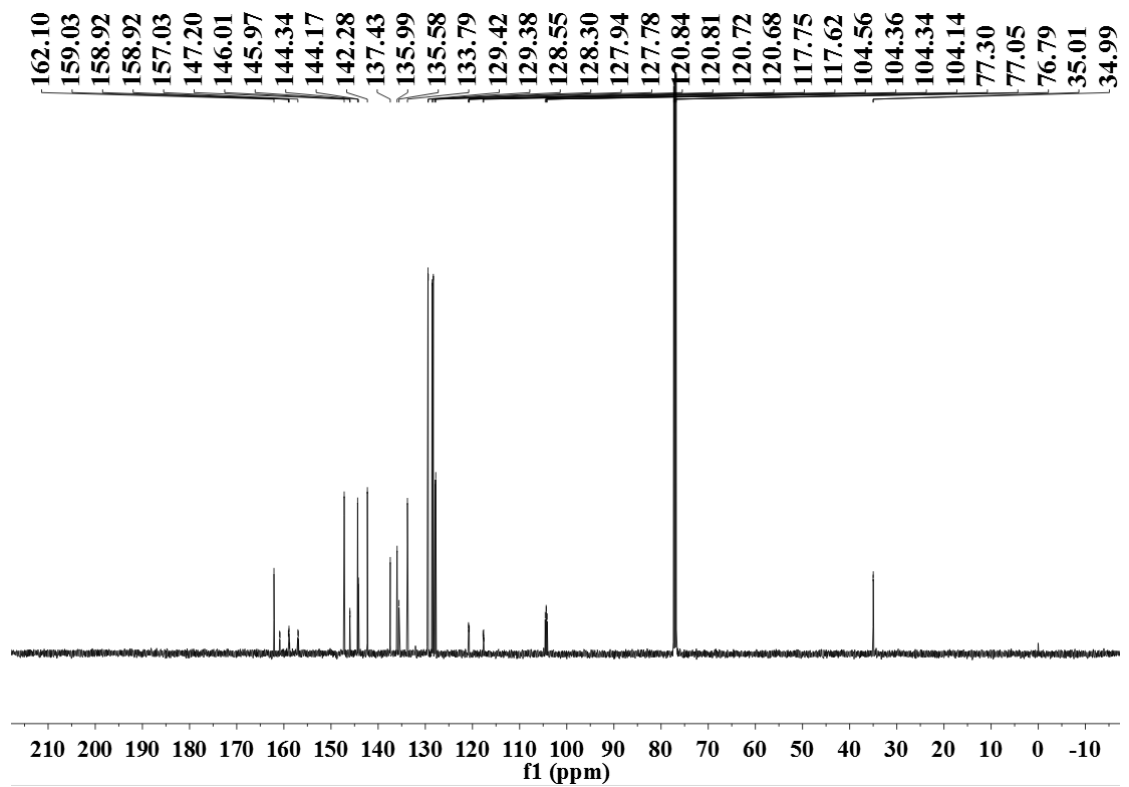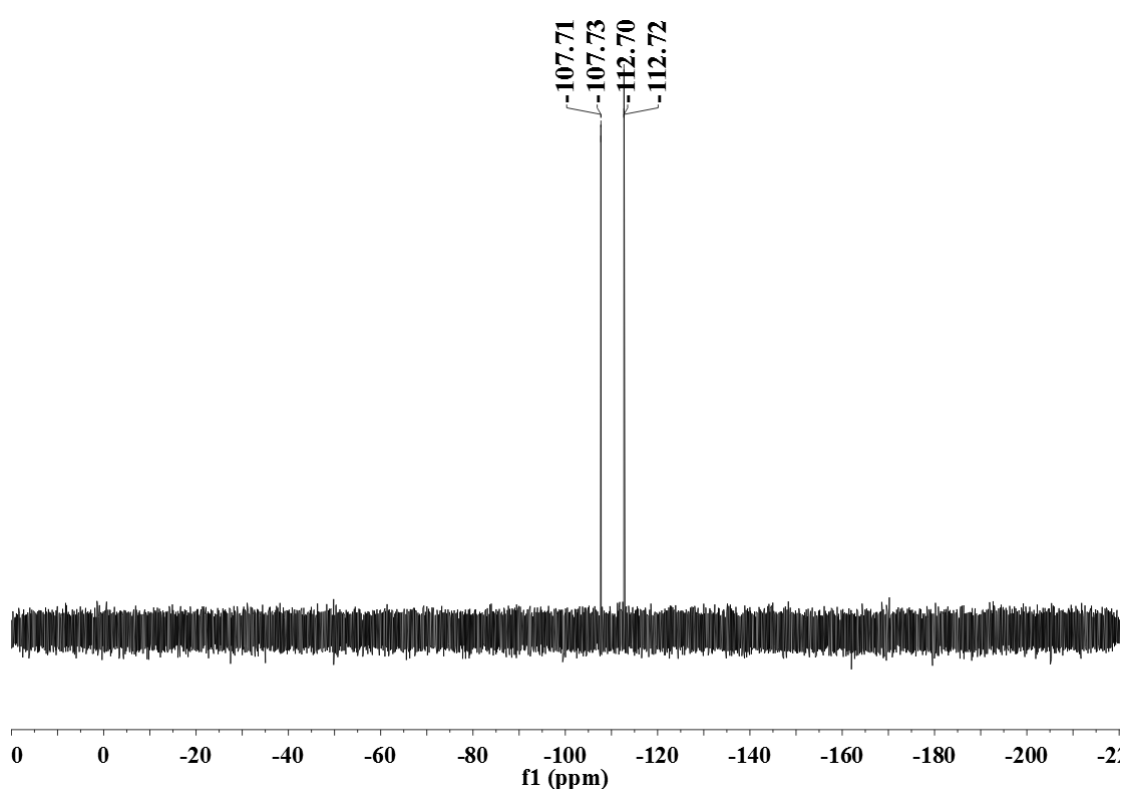

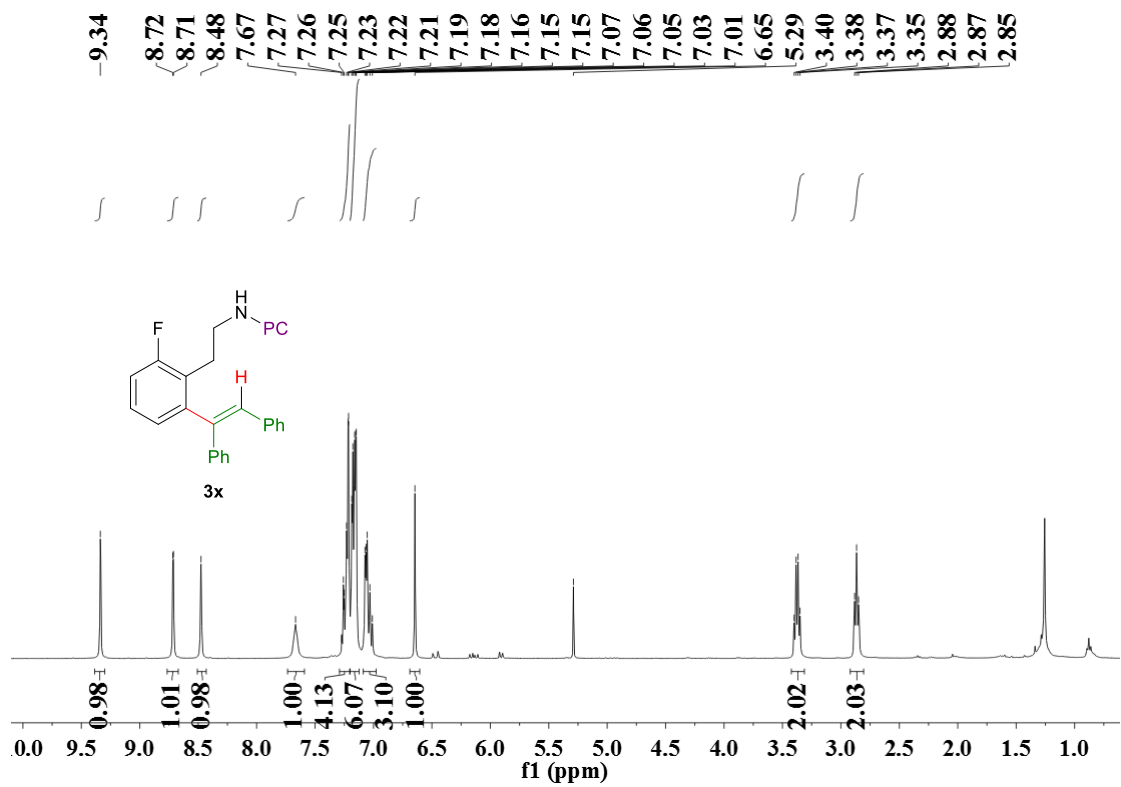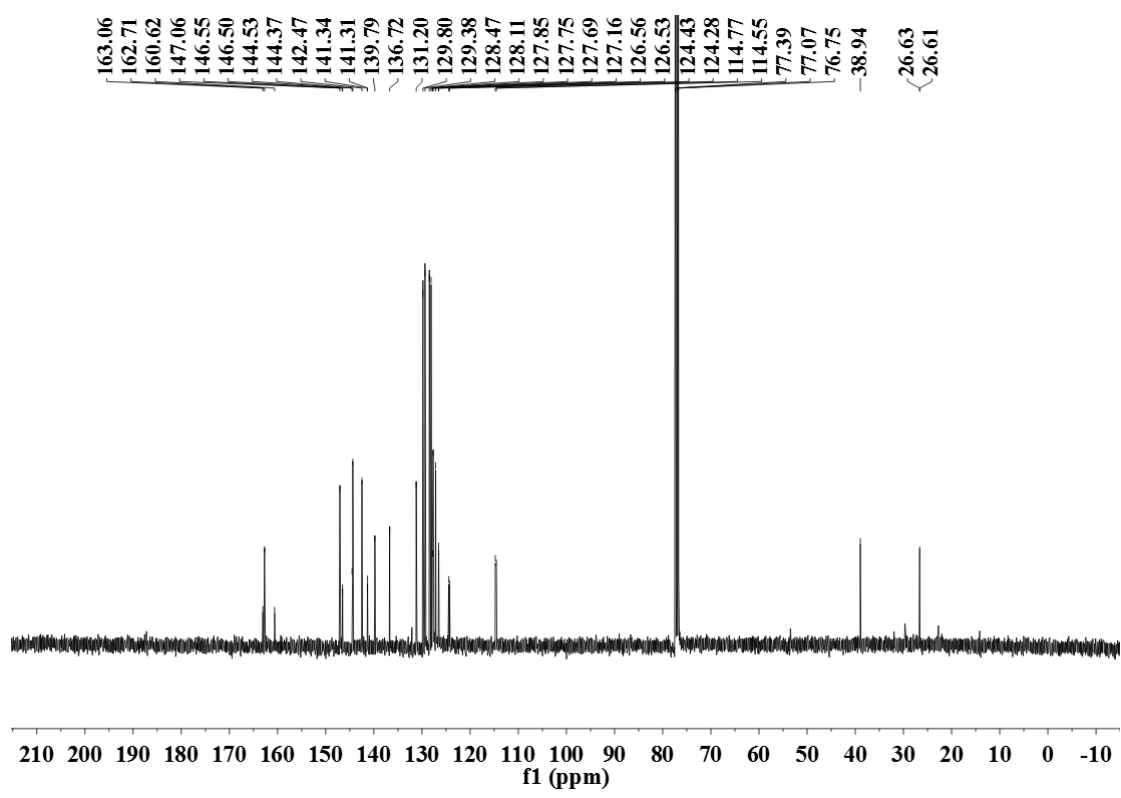

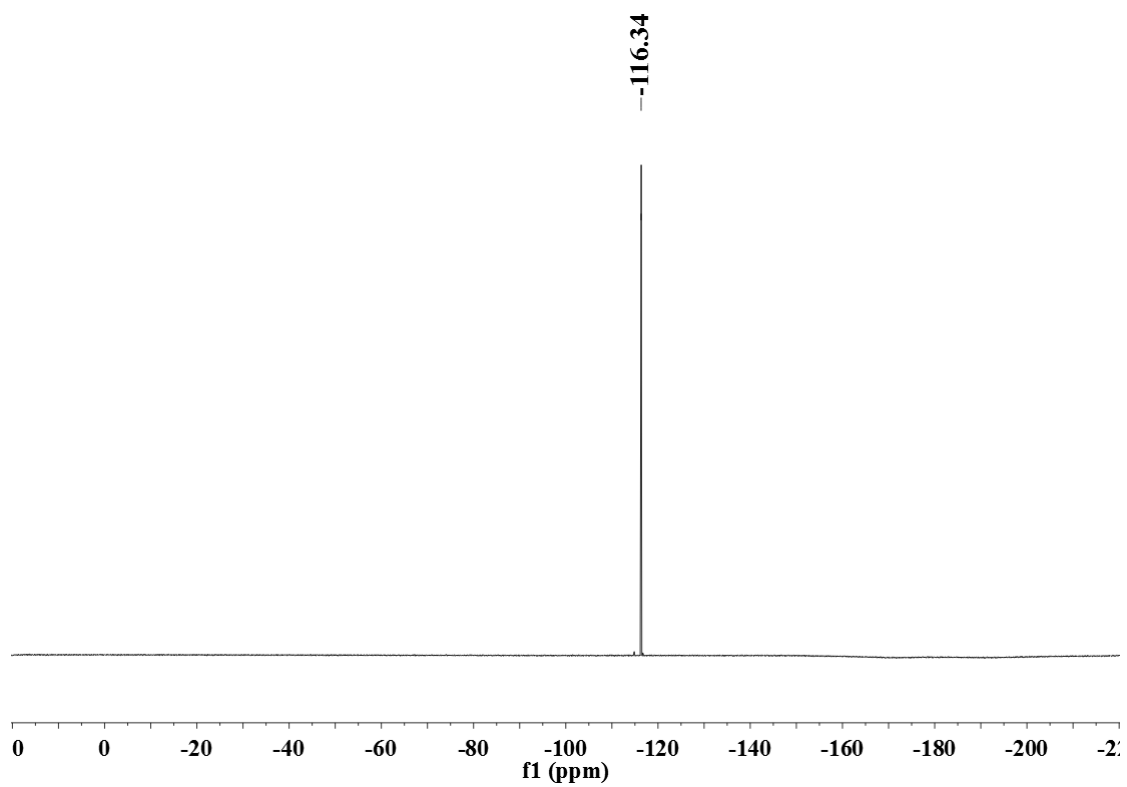

8.45  
8.44  
8.12  
8.11  
7.93  
7.78  
7.76  
7.75  
7.36  
7.35  
7.35  
7.35  
7.34  
7.30  
7.29  
7.28  
7.26  
7.24  
7.21  
7.20  
7.19  
7.18  
7.16  
7.15  
7.13  
7.11  
7.10  
7.07  
7.05  
7.04  
6.71  
4.59  
4.58

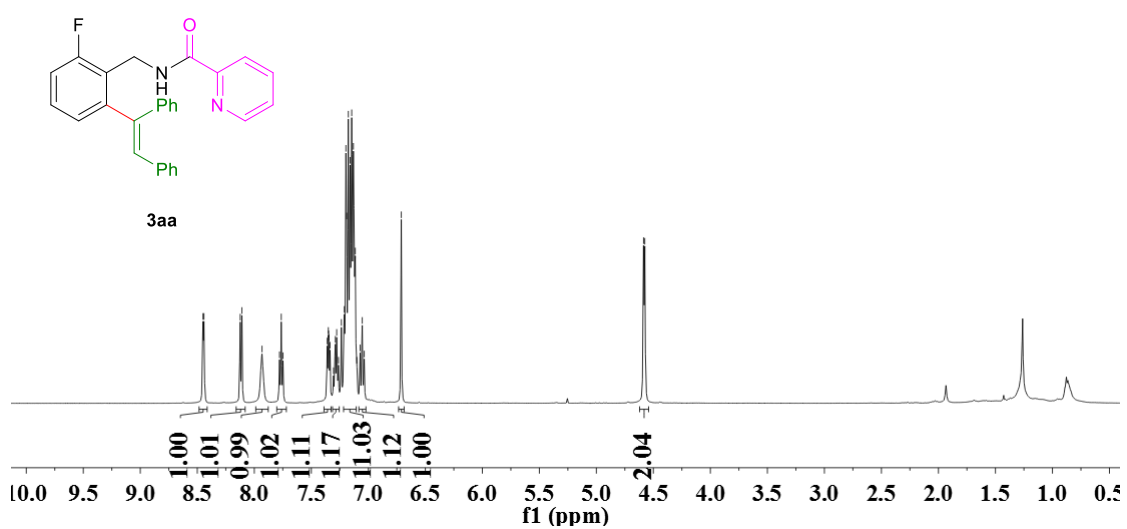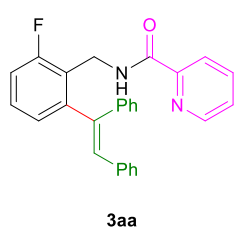

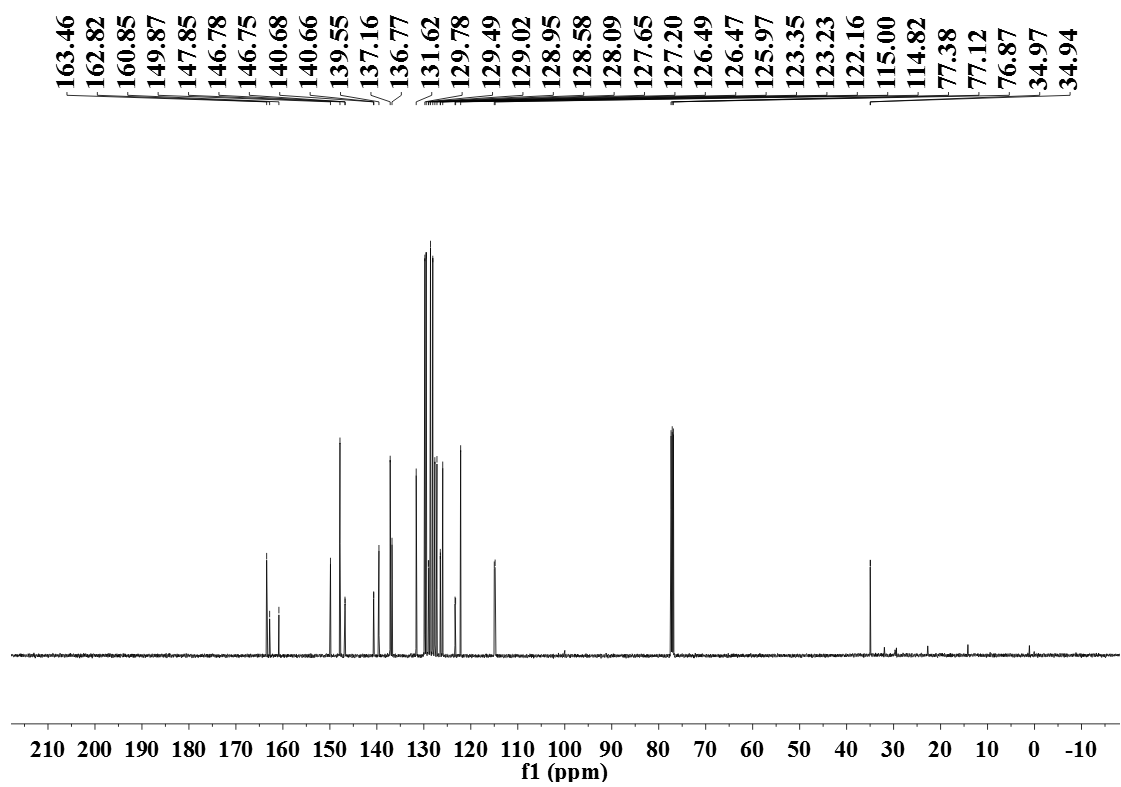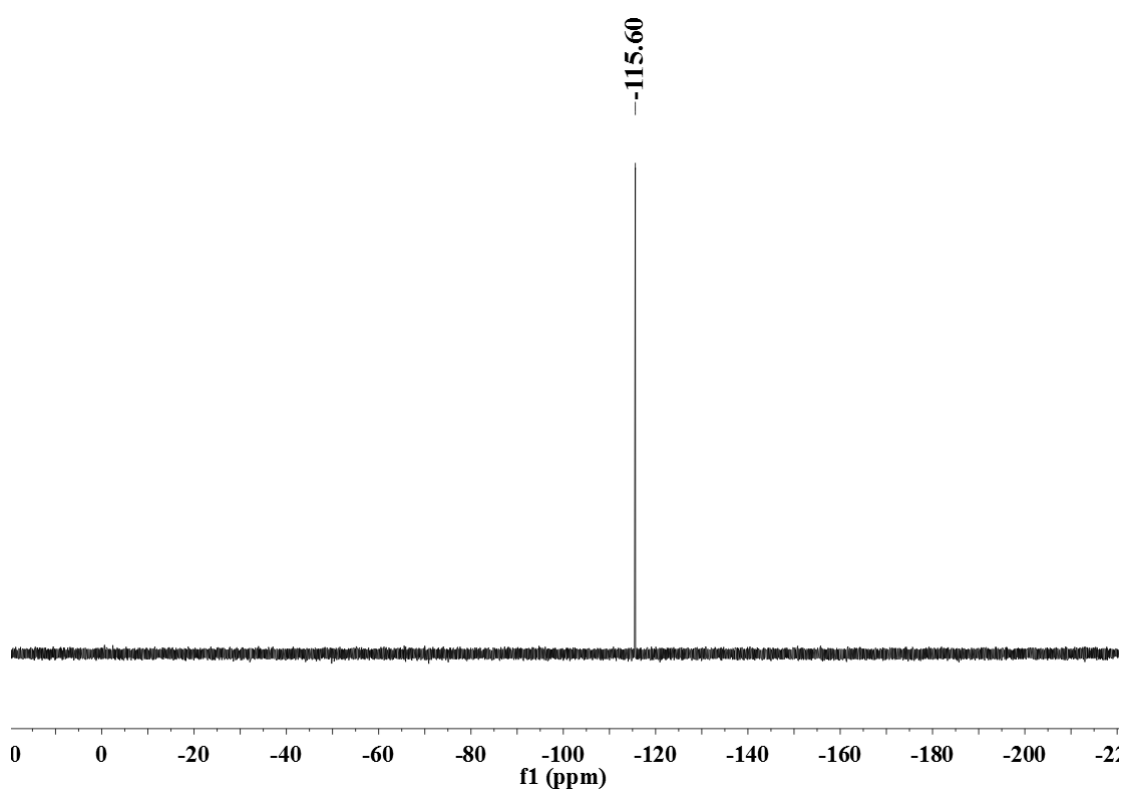

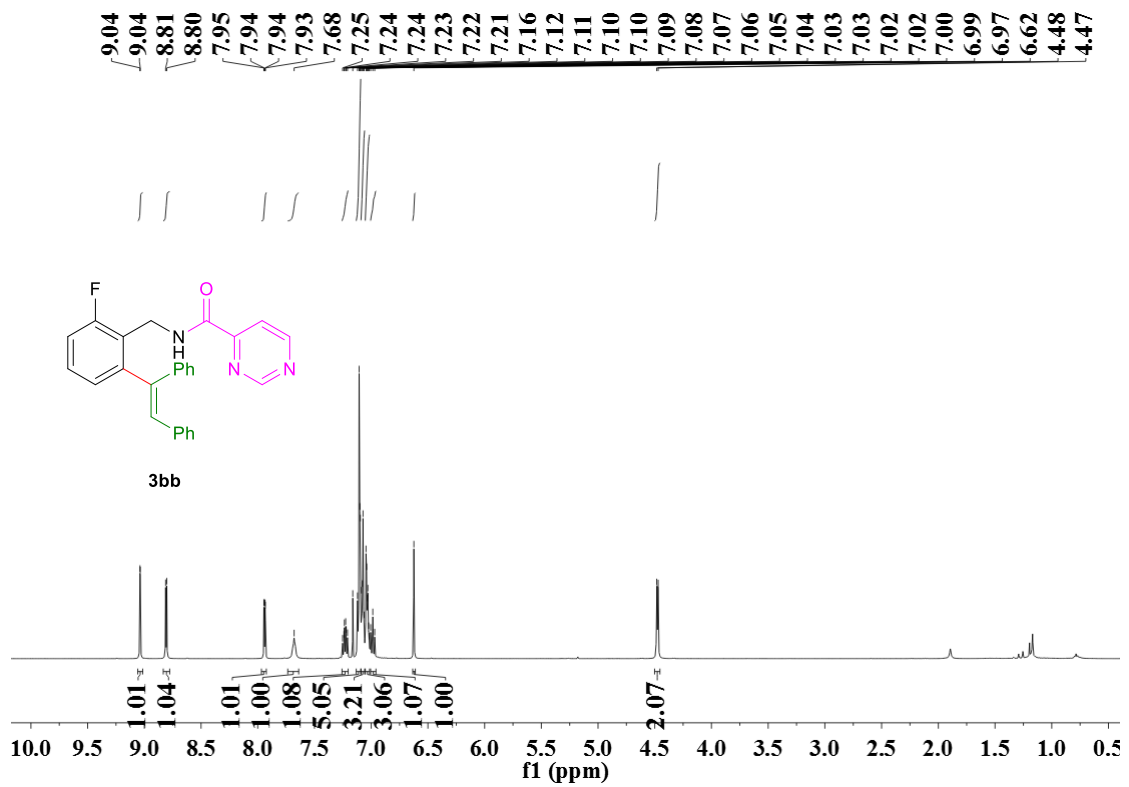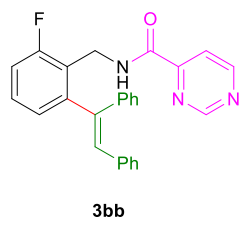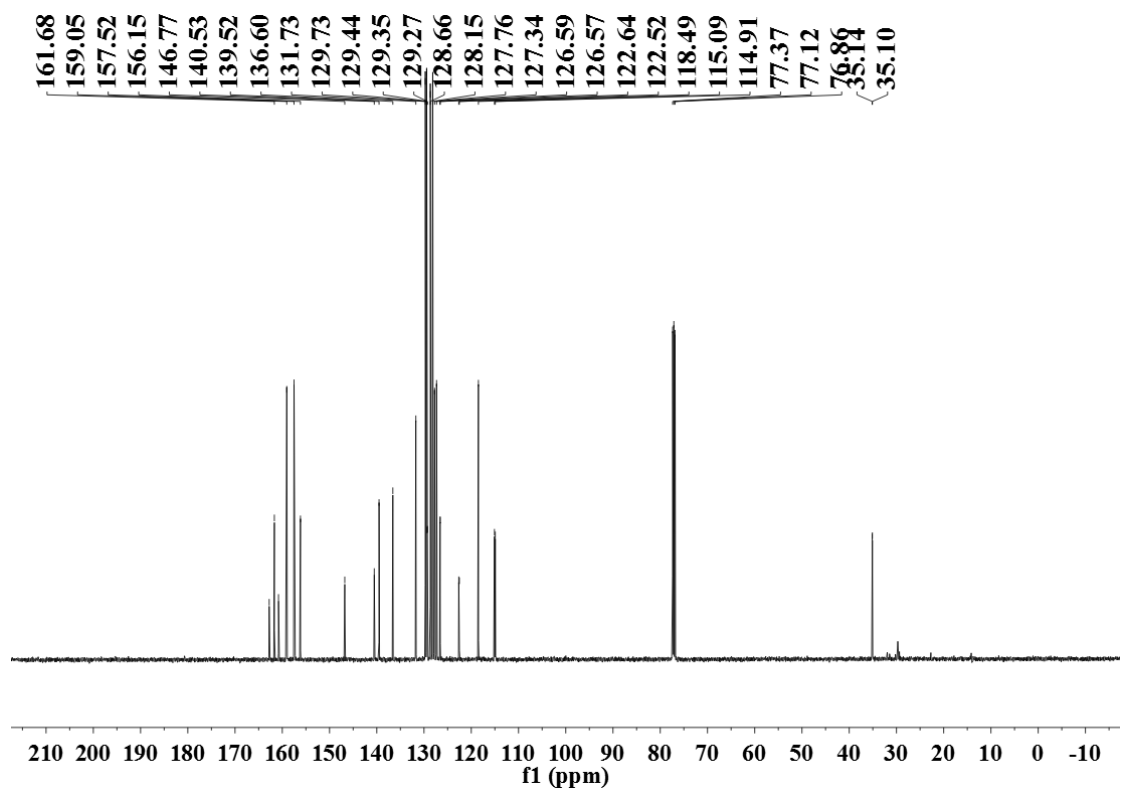

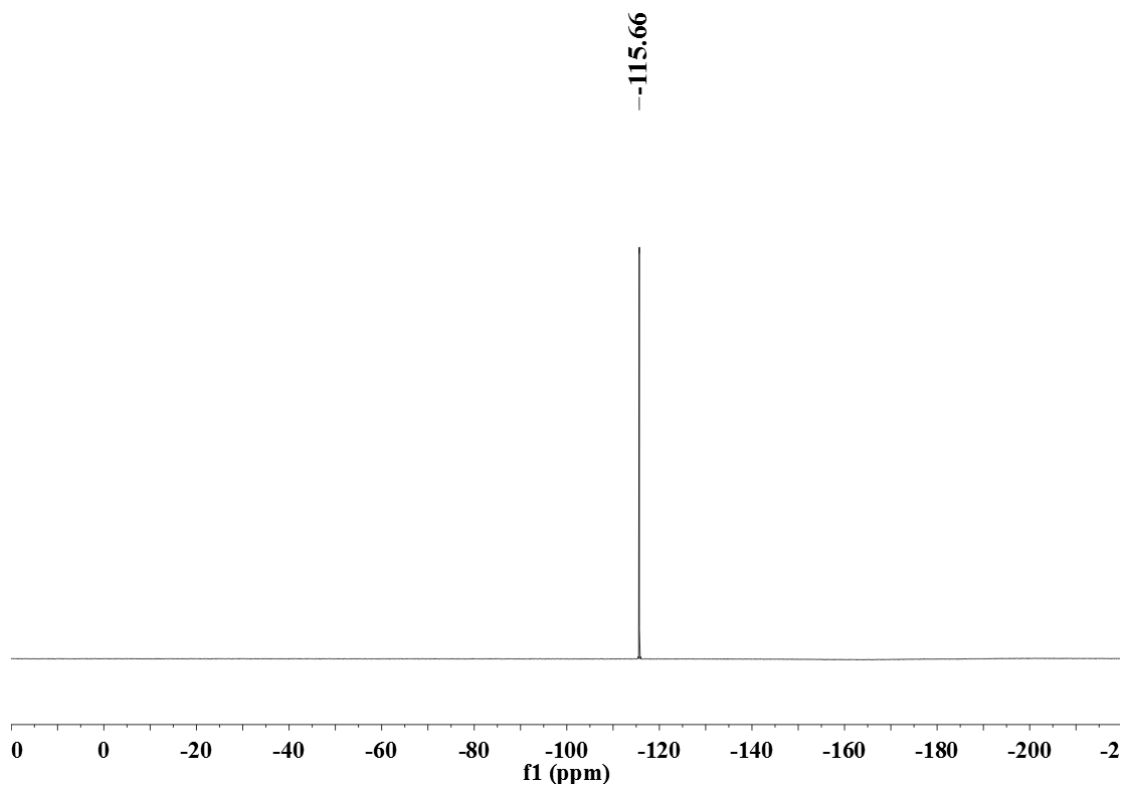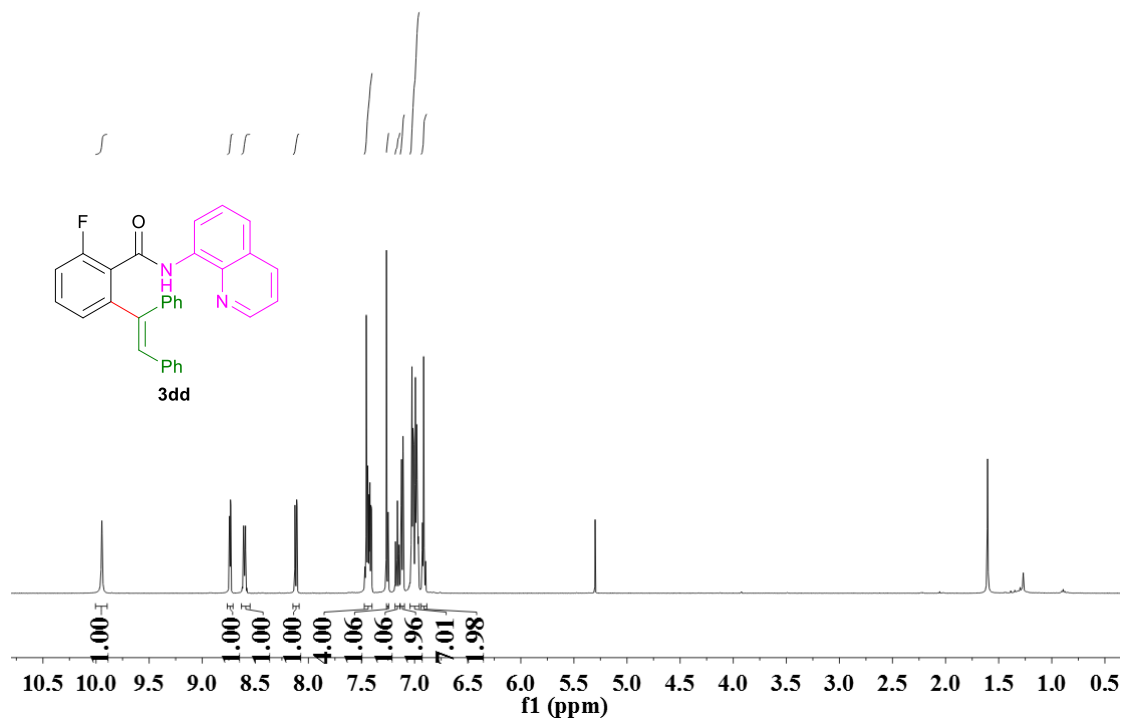

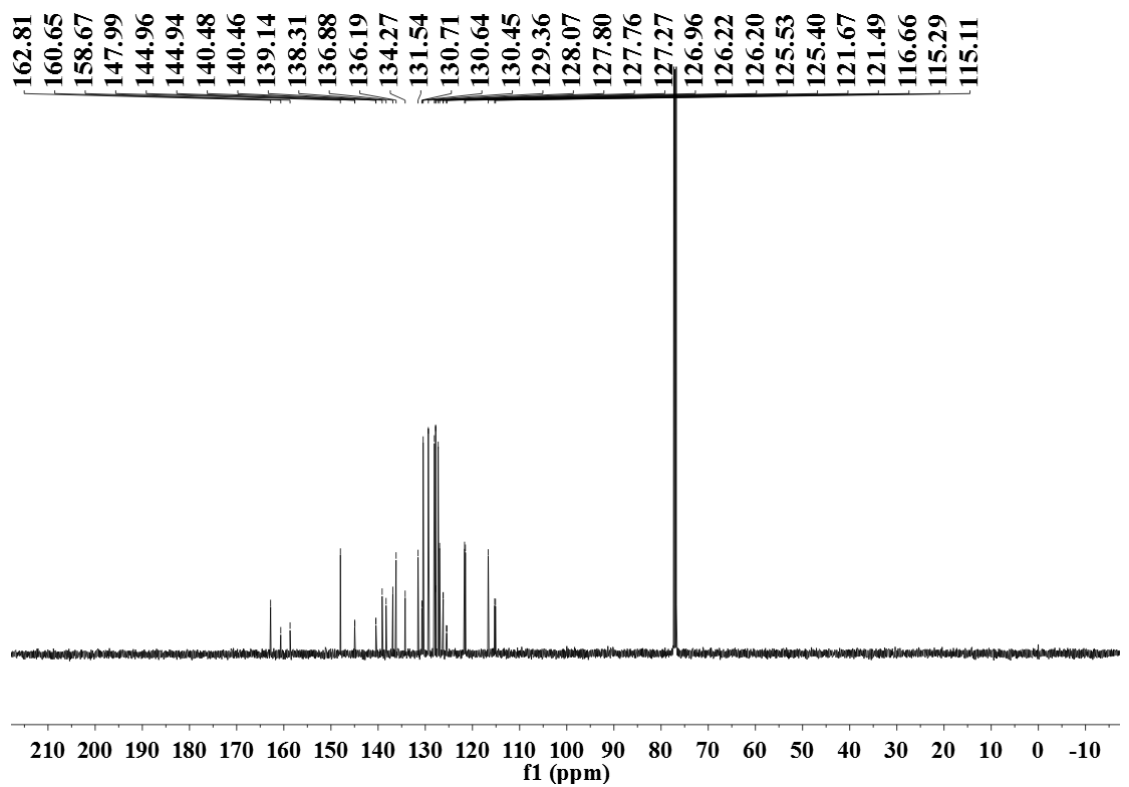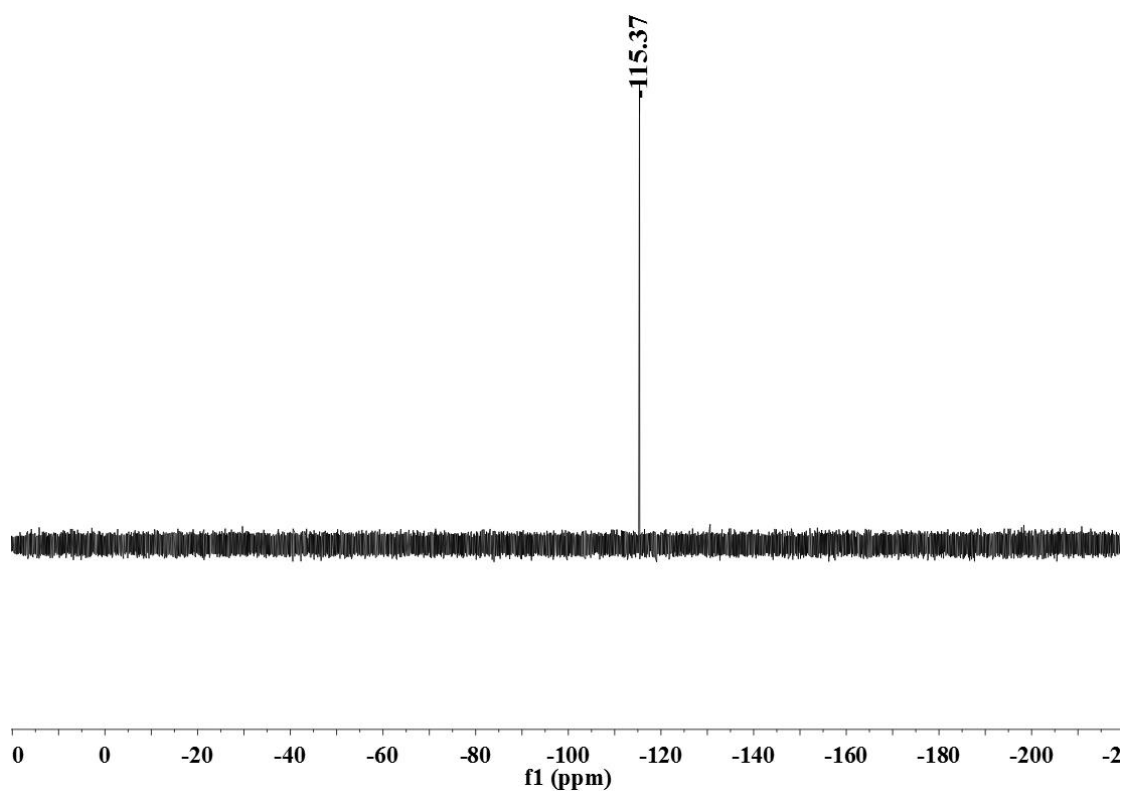



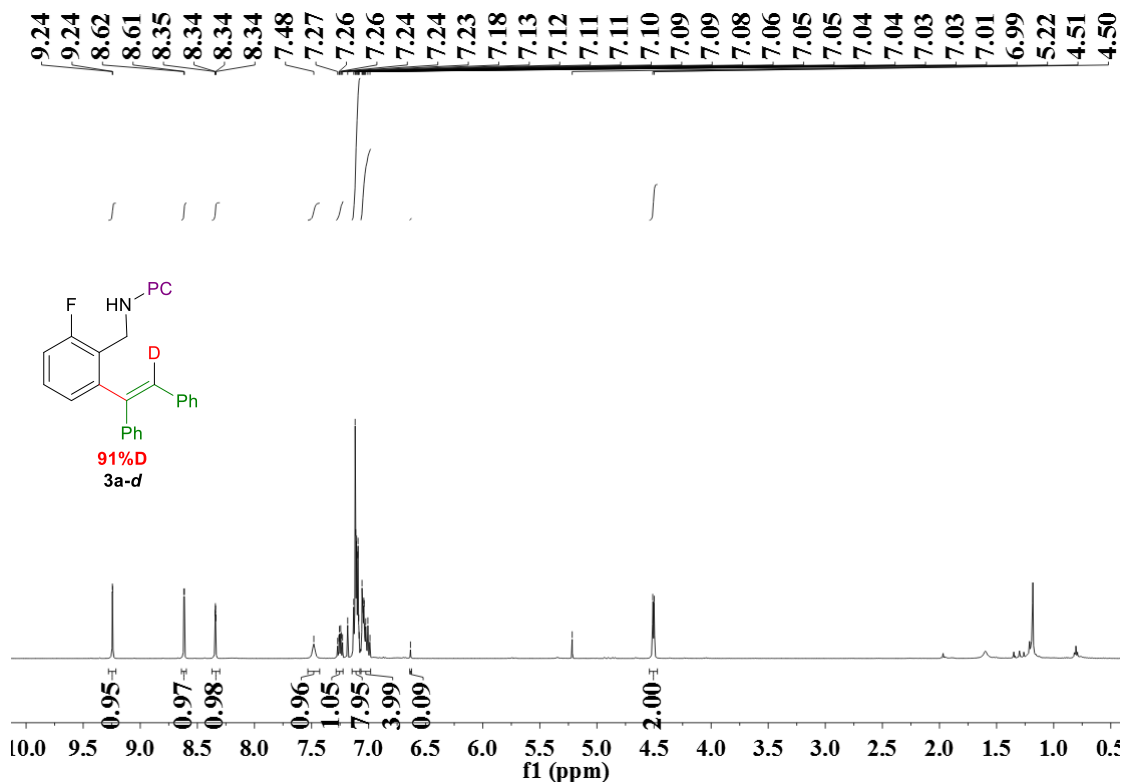

### 9.3 NMR Spectra of 5

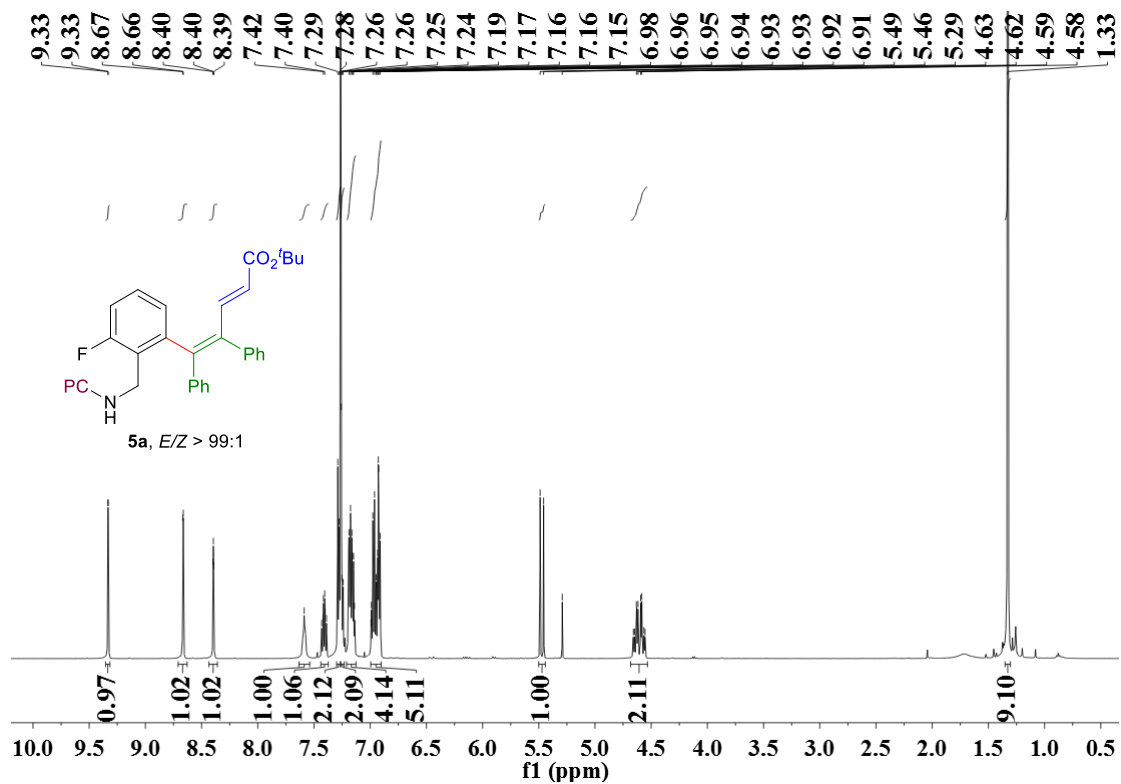

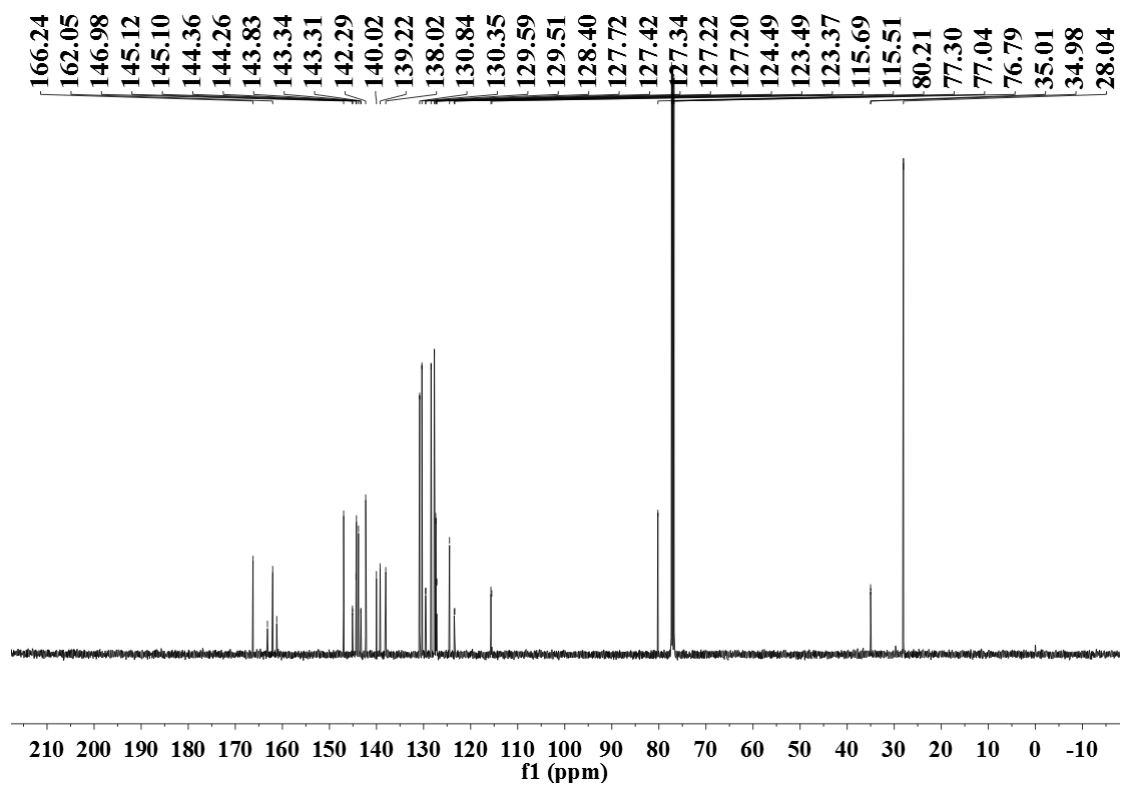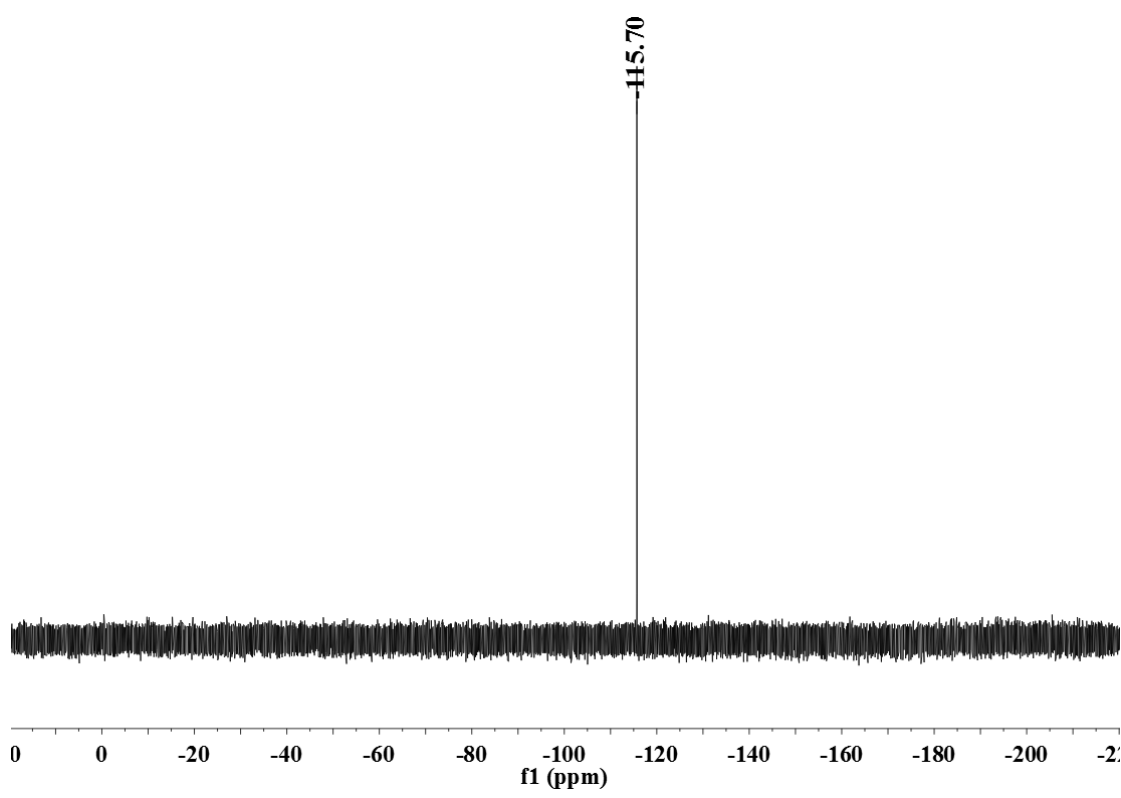

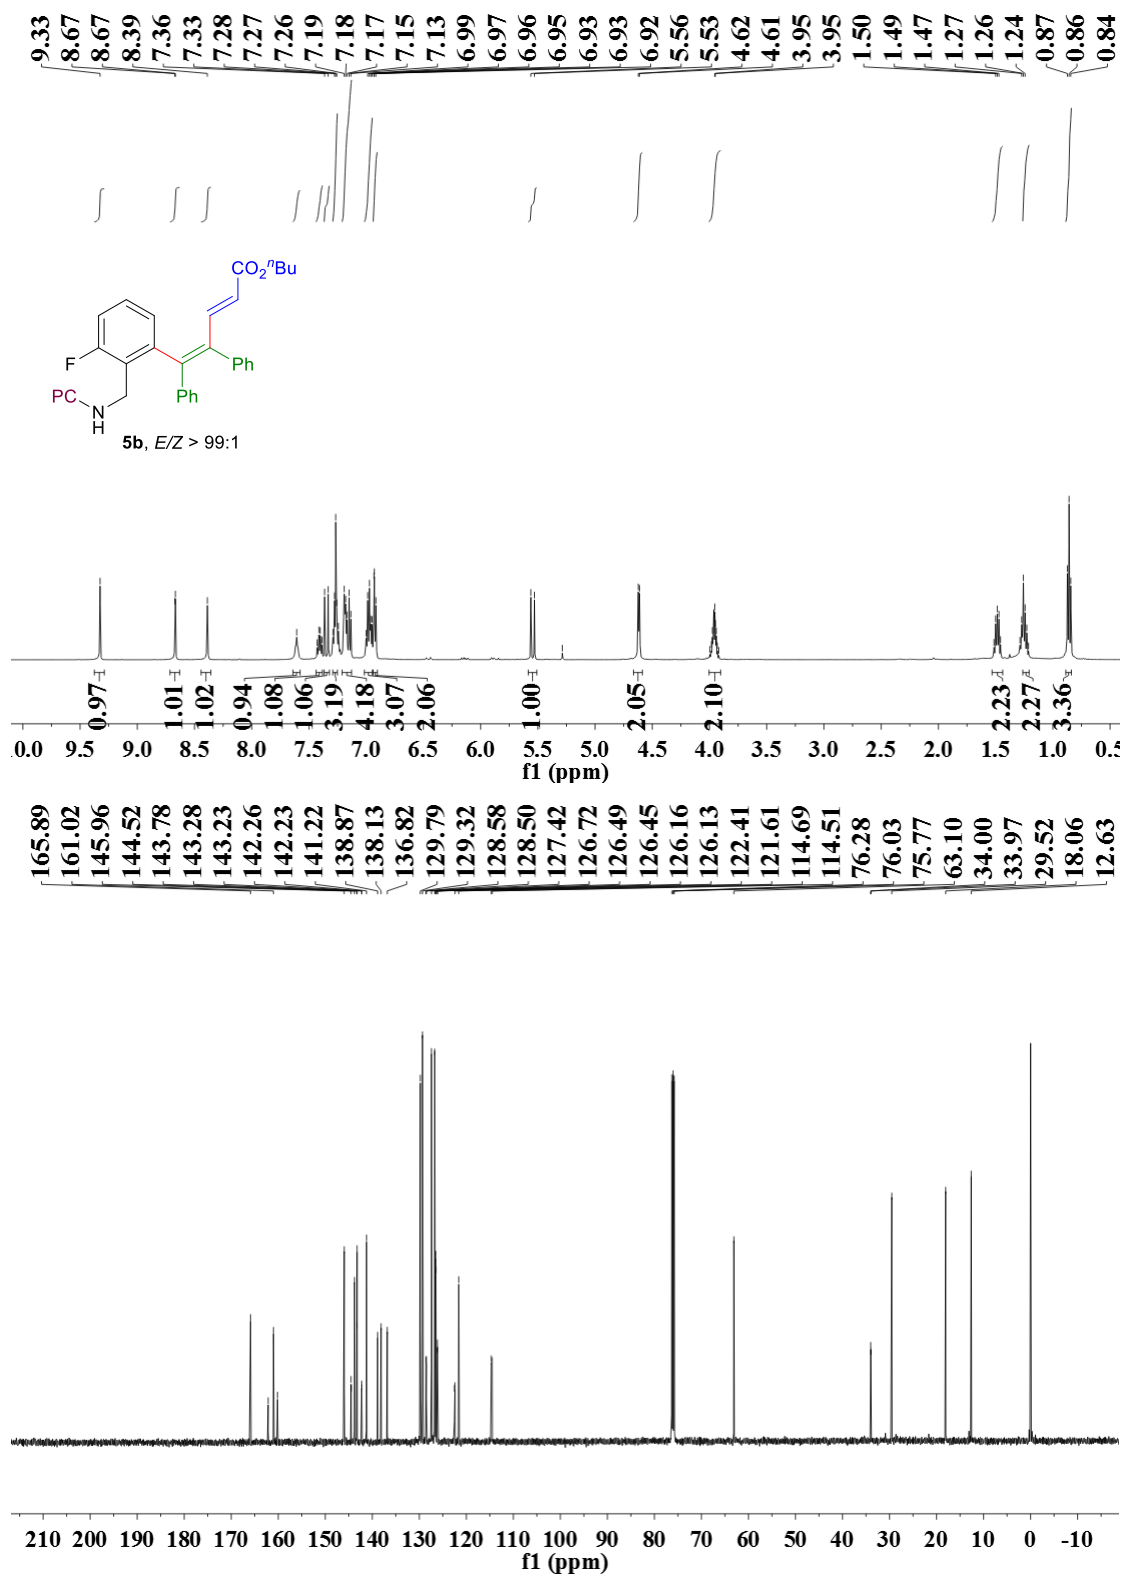

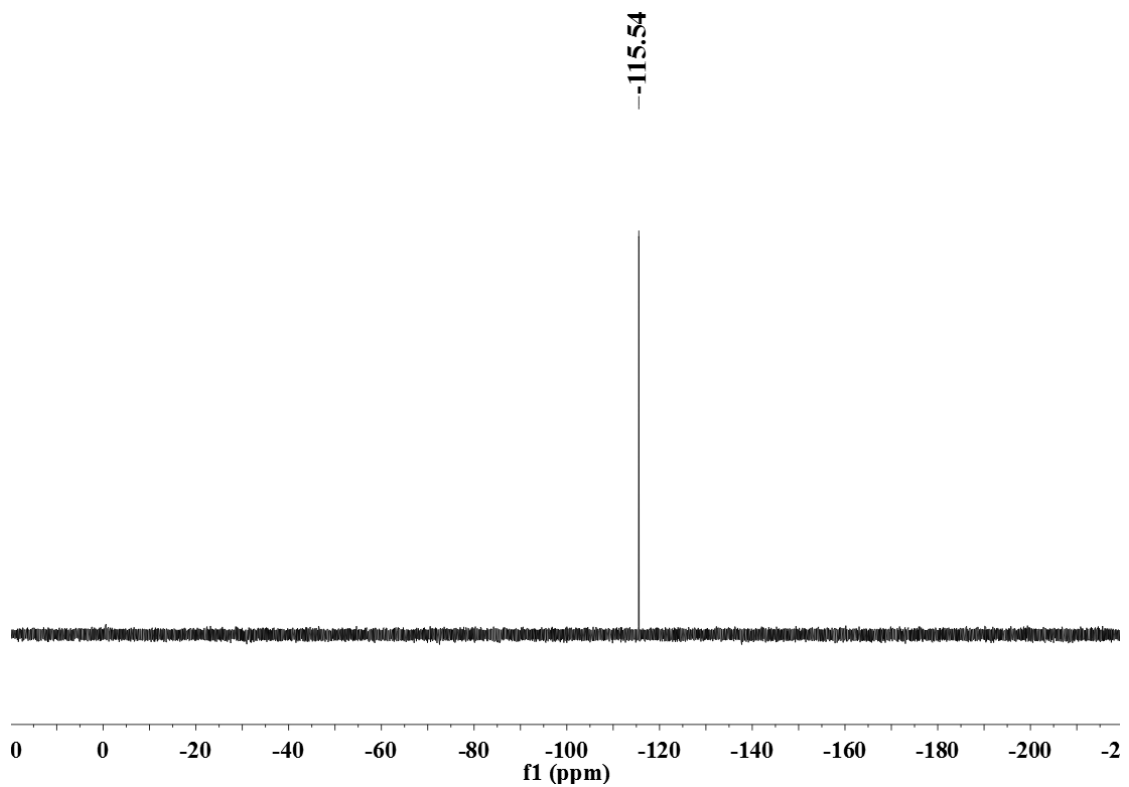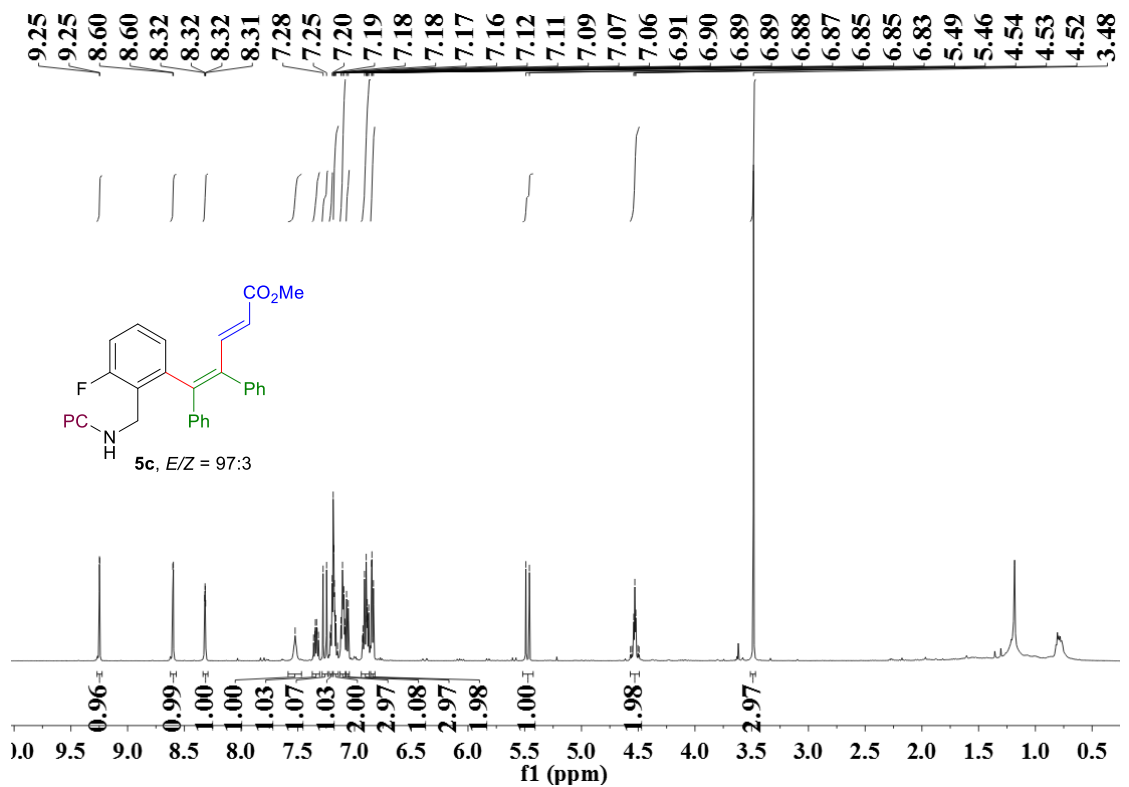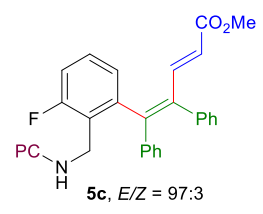

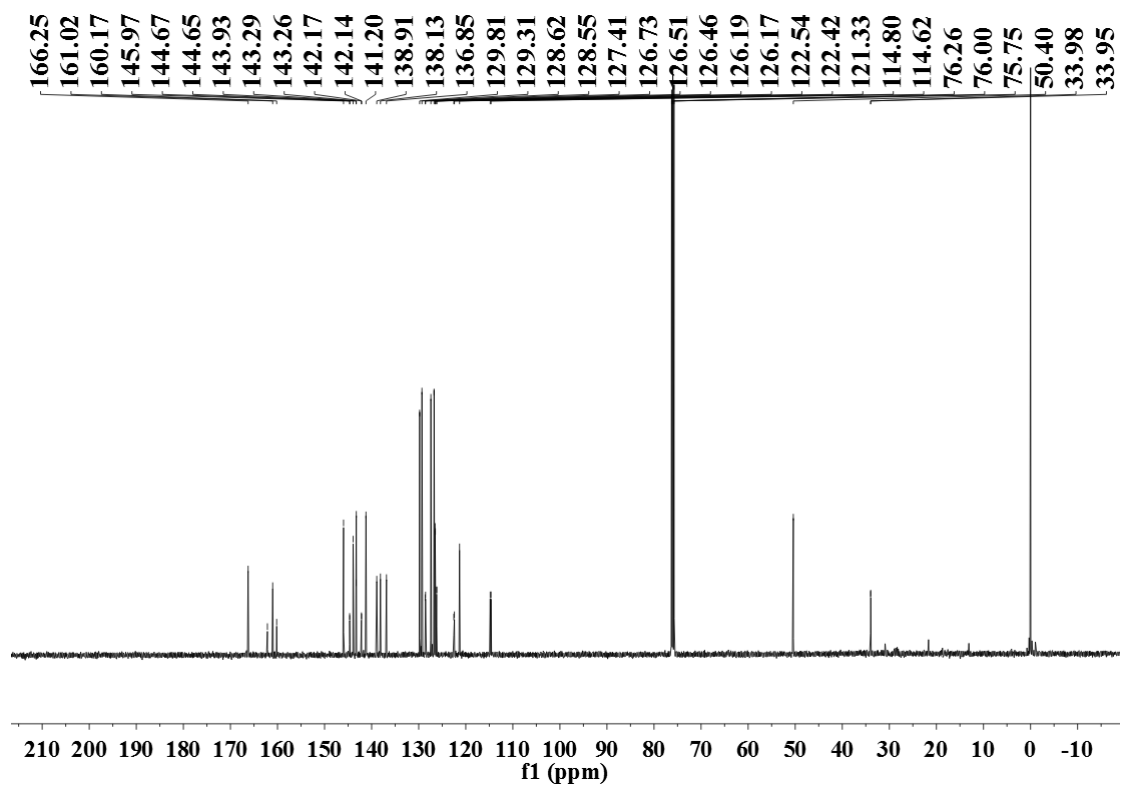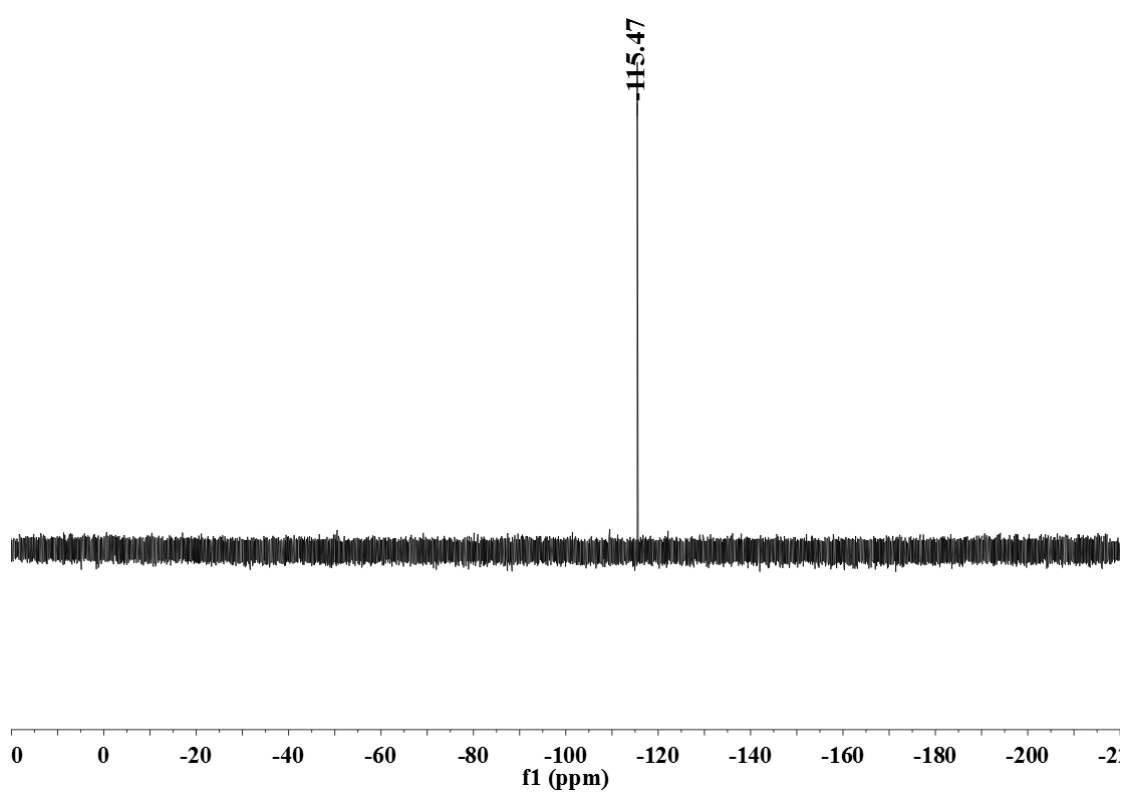

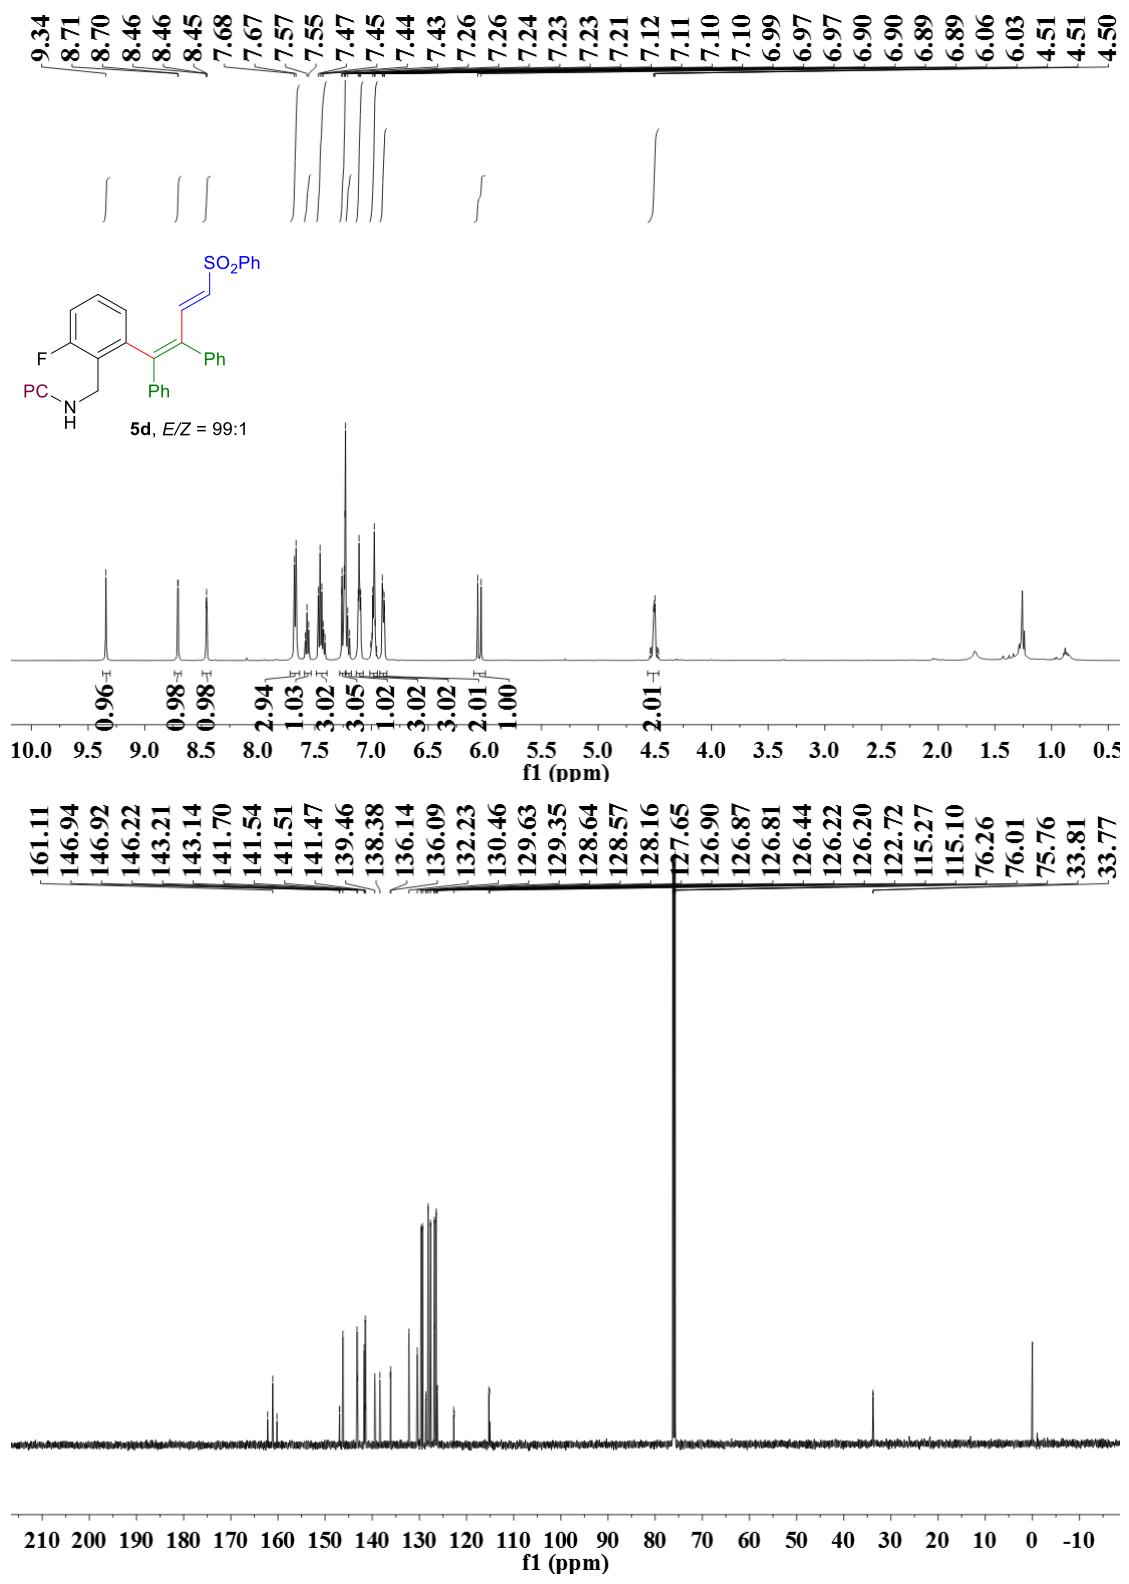

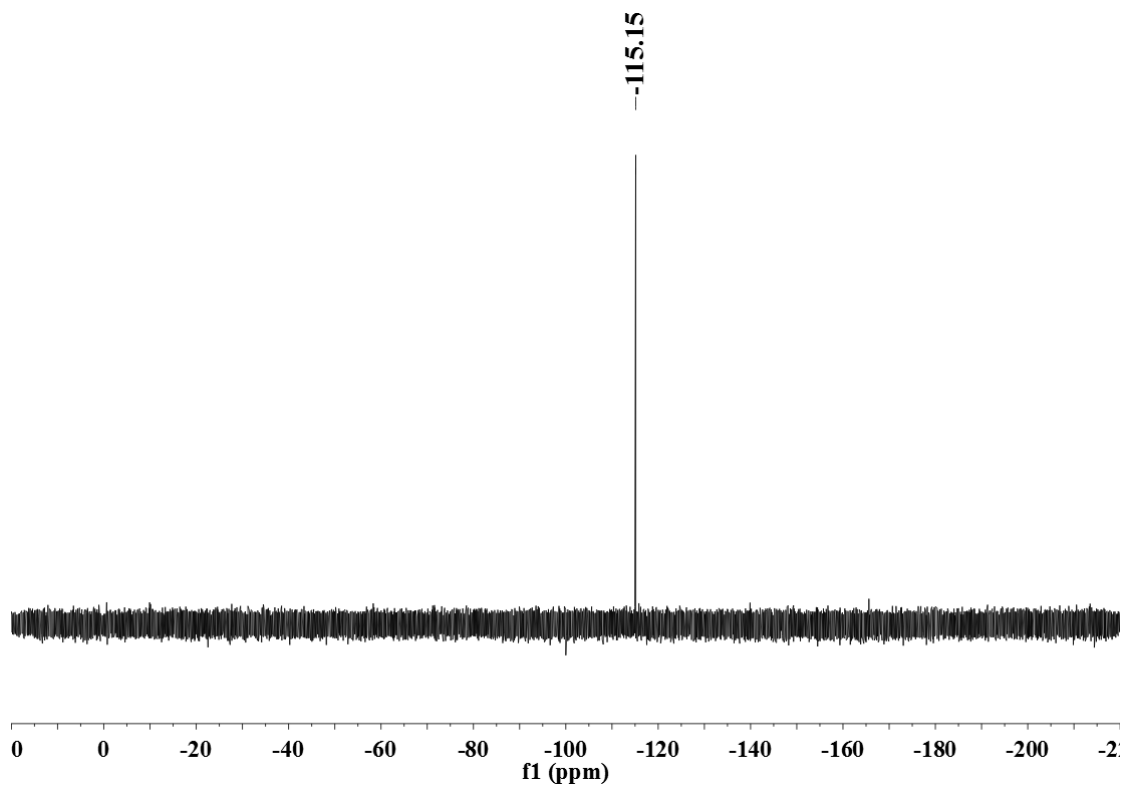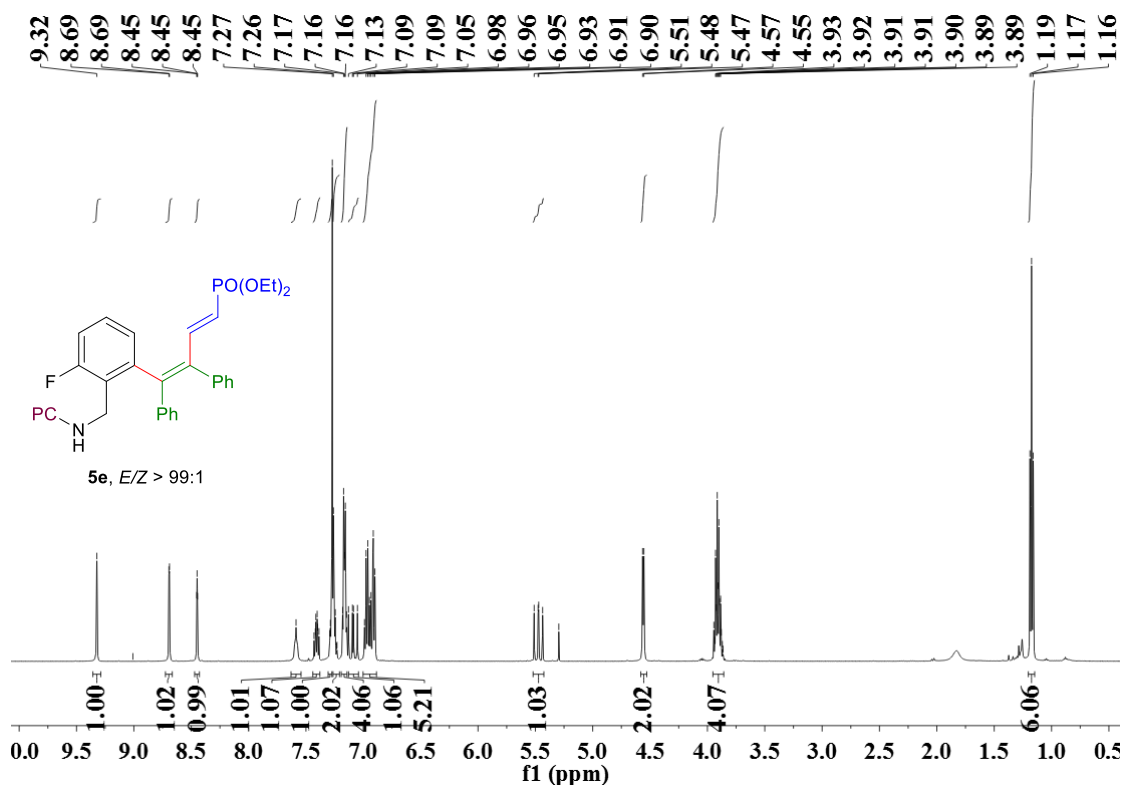

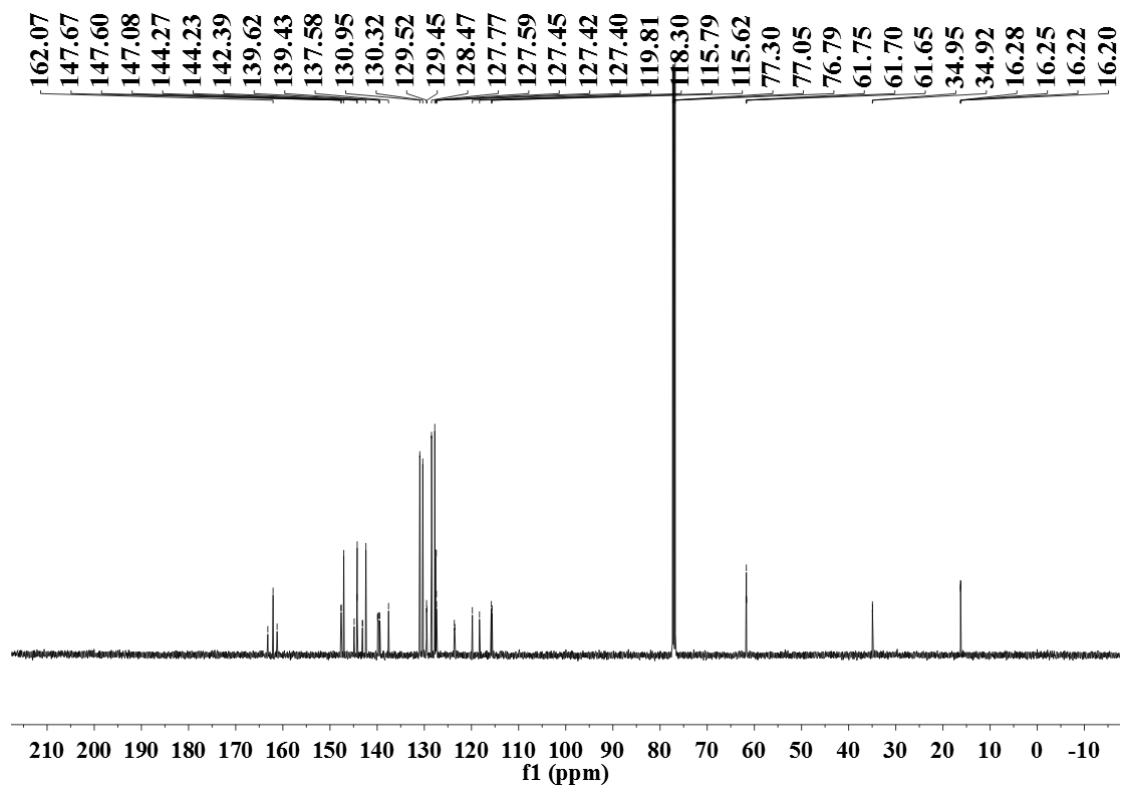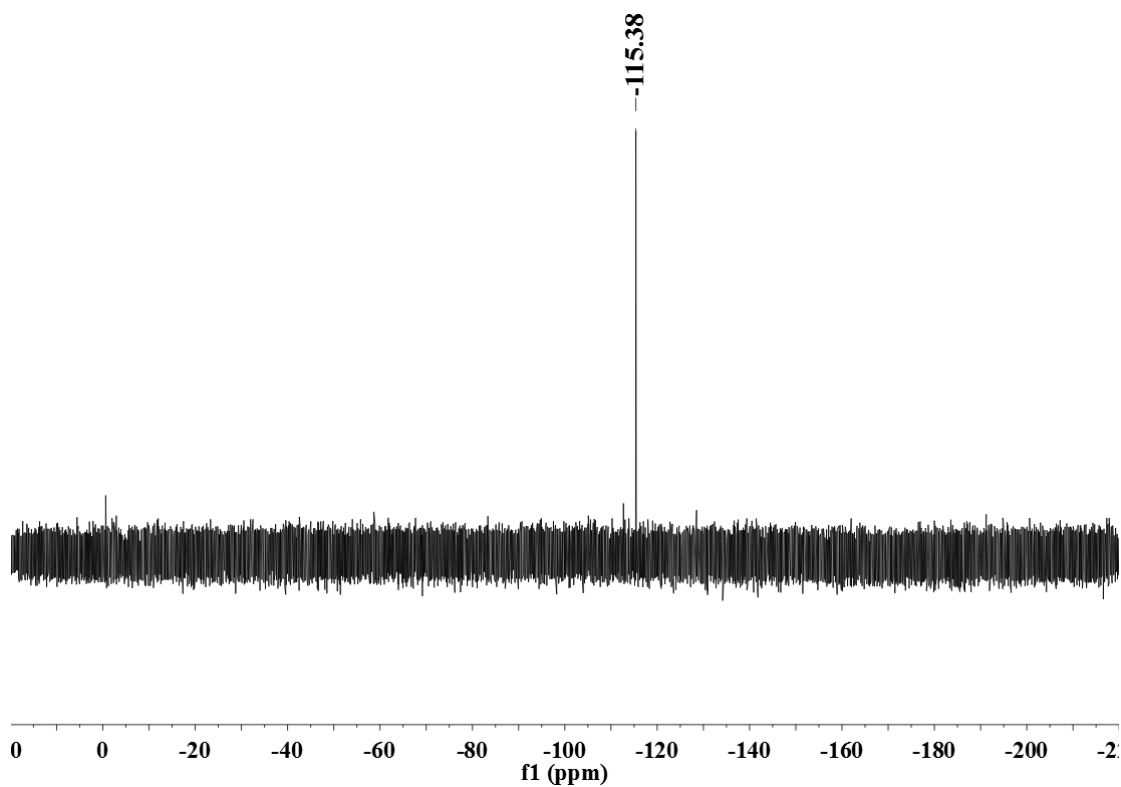



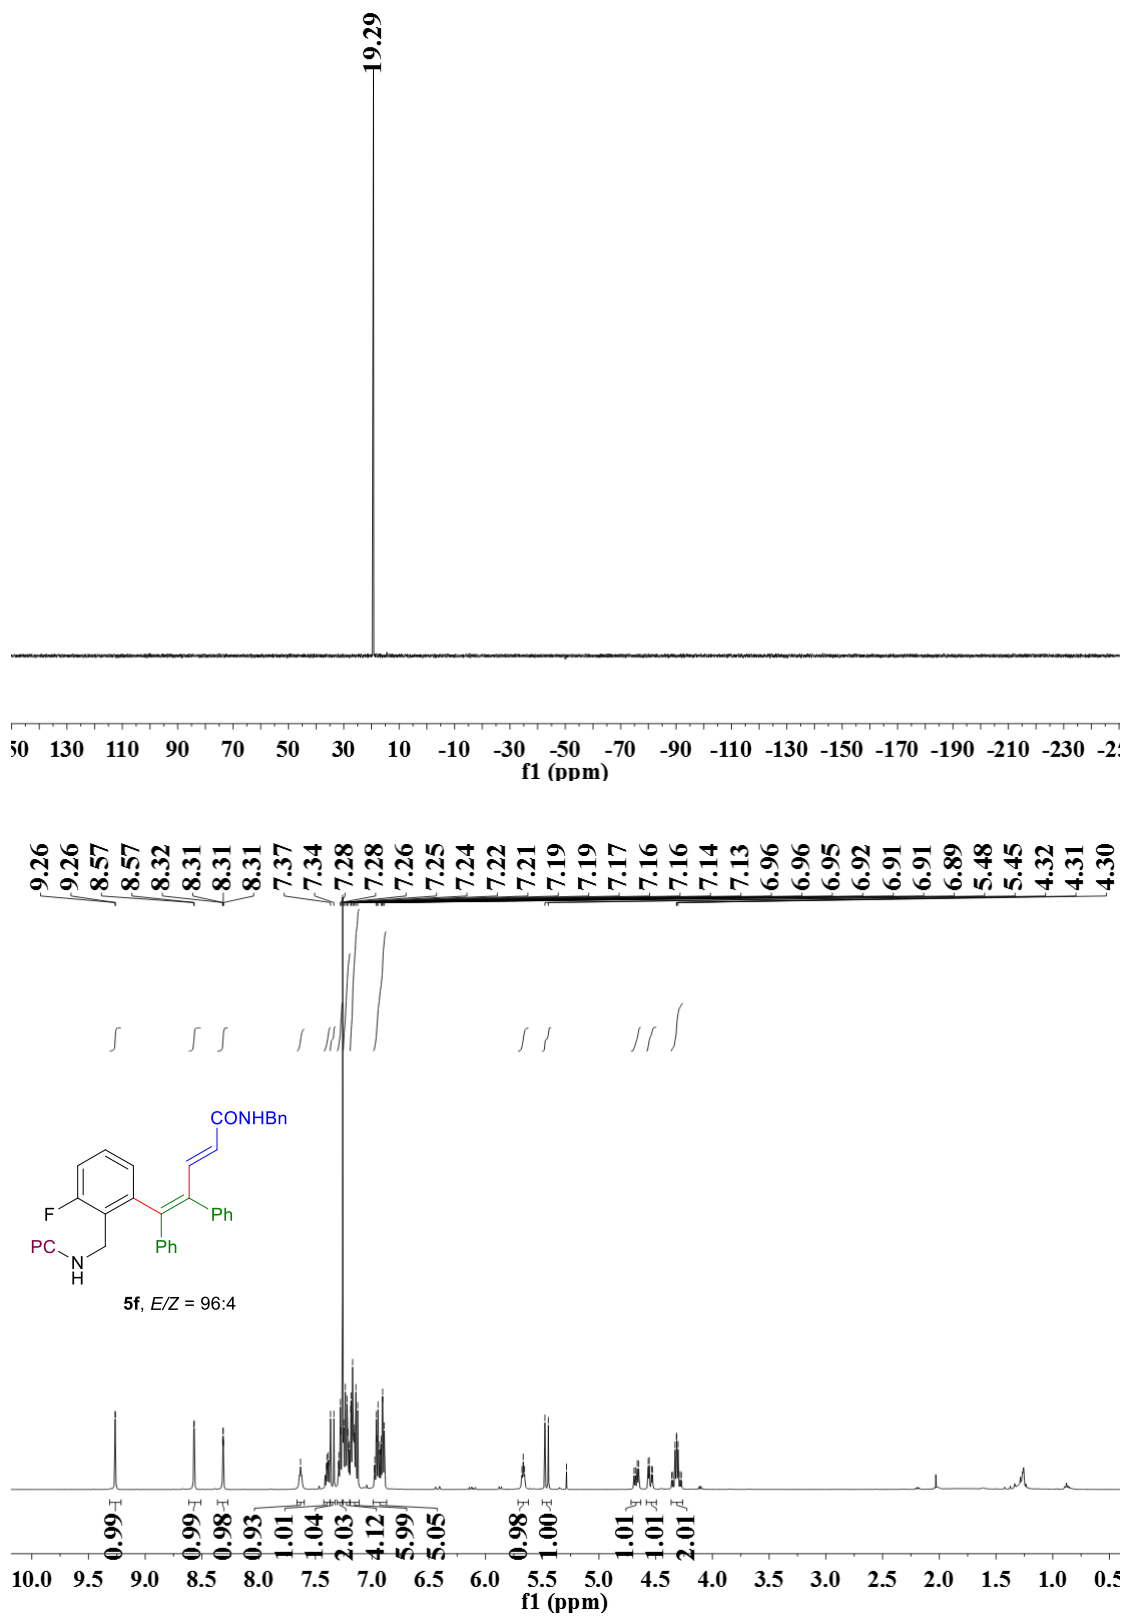

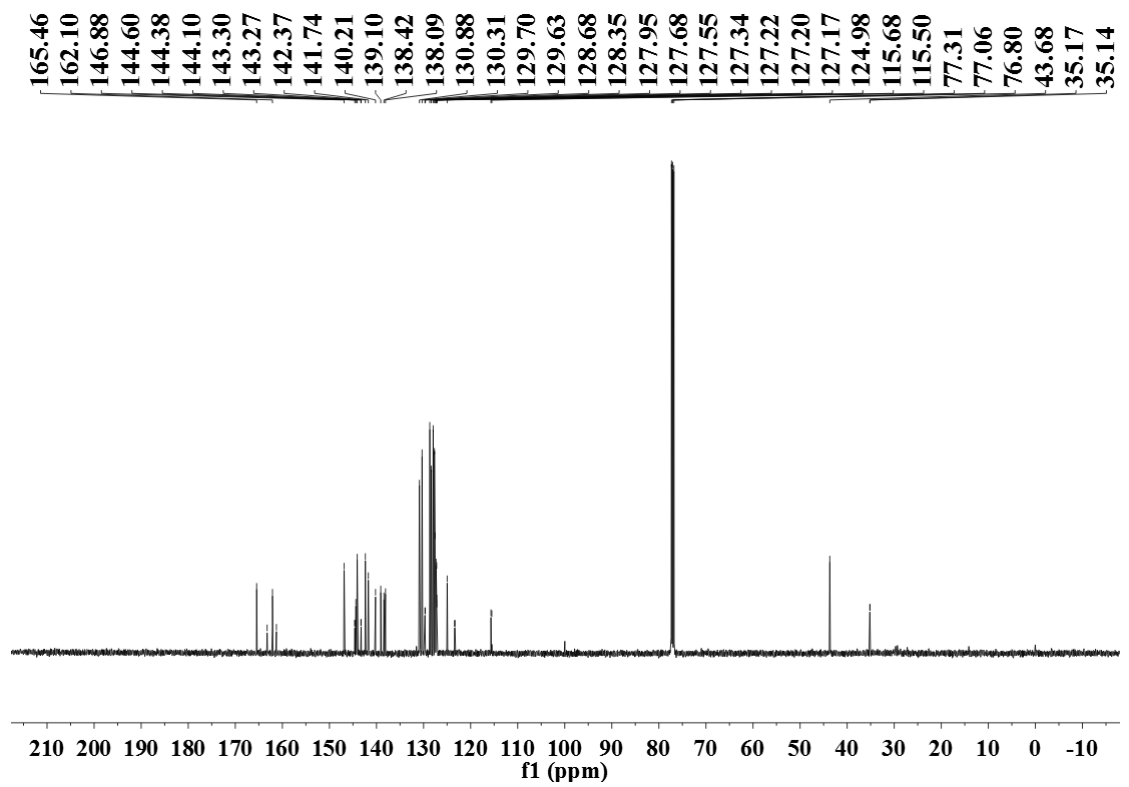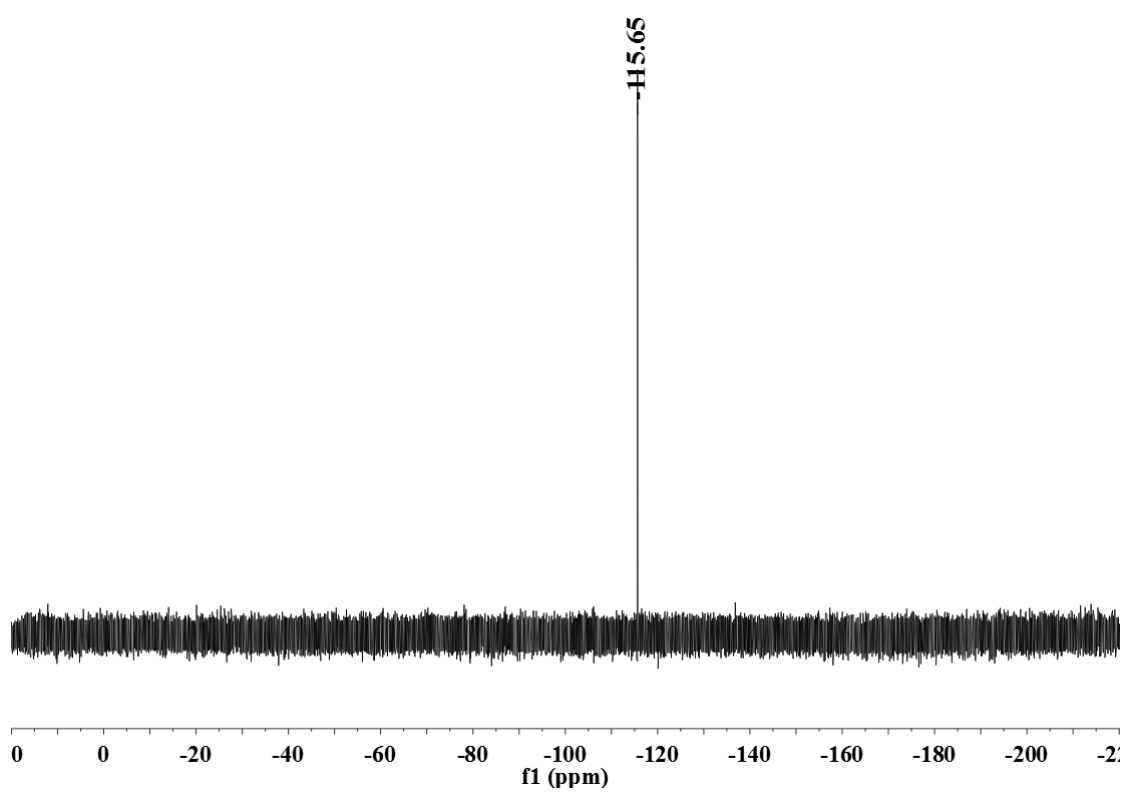

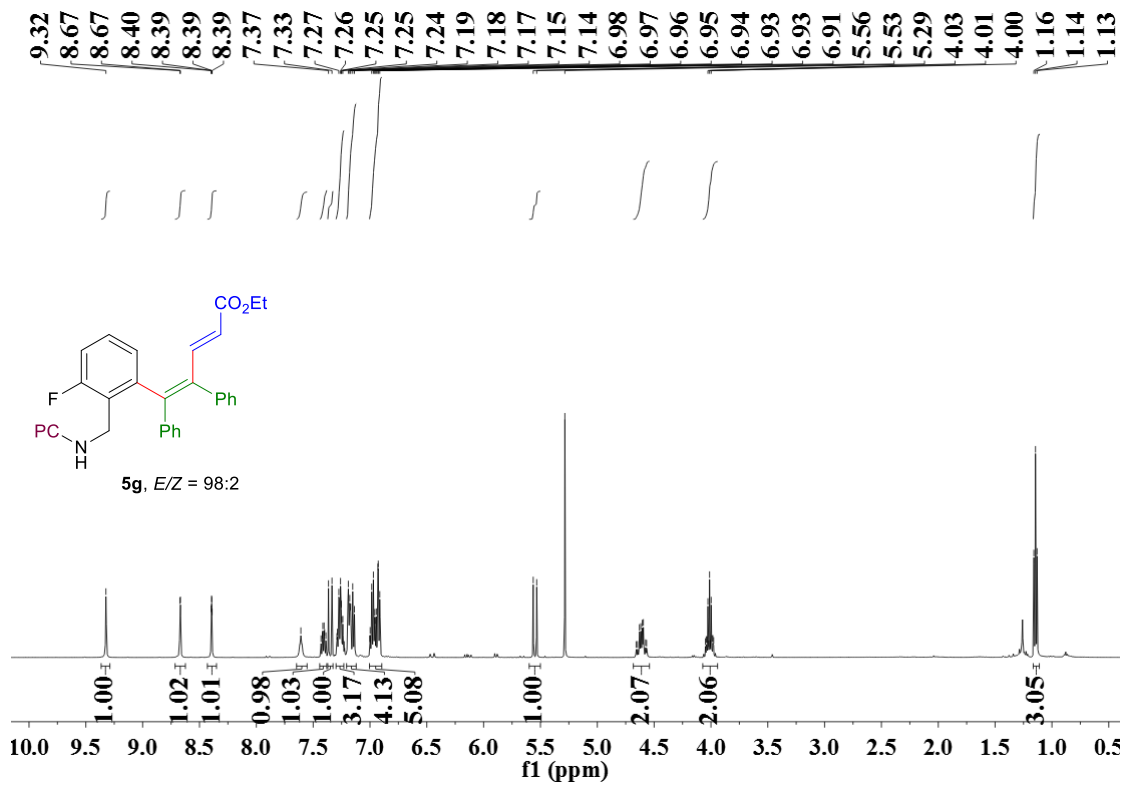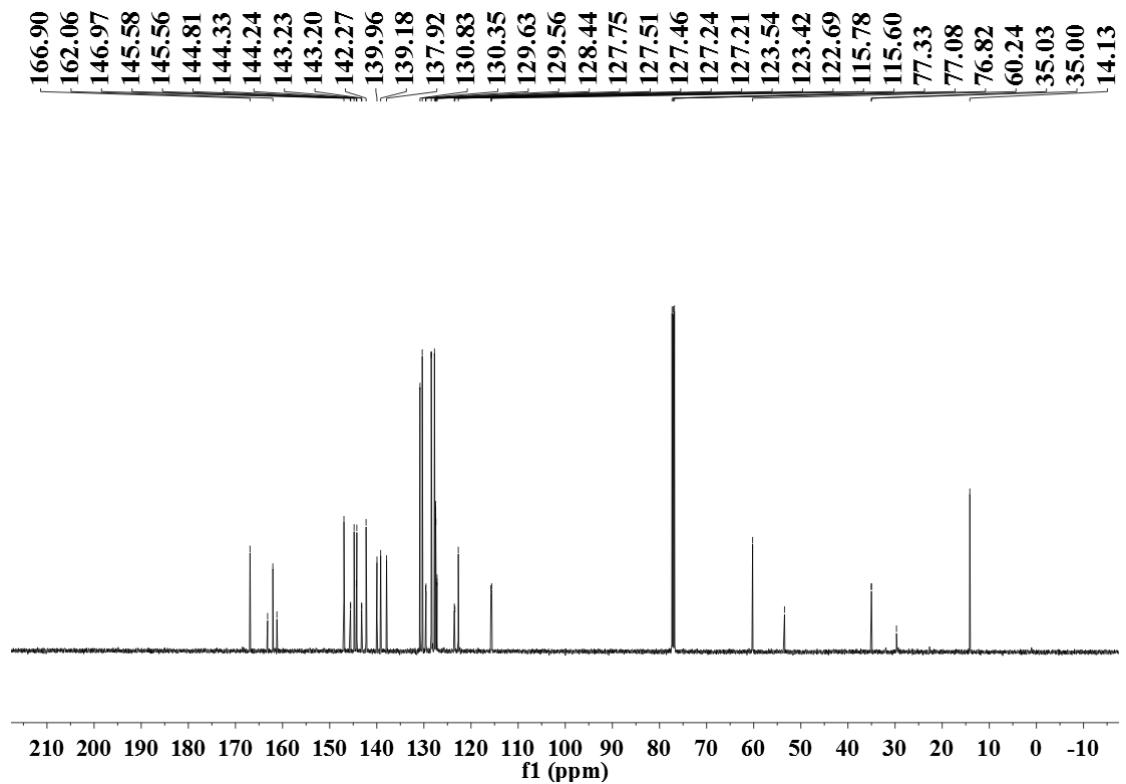

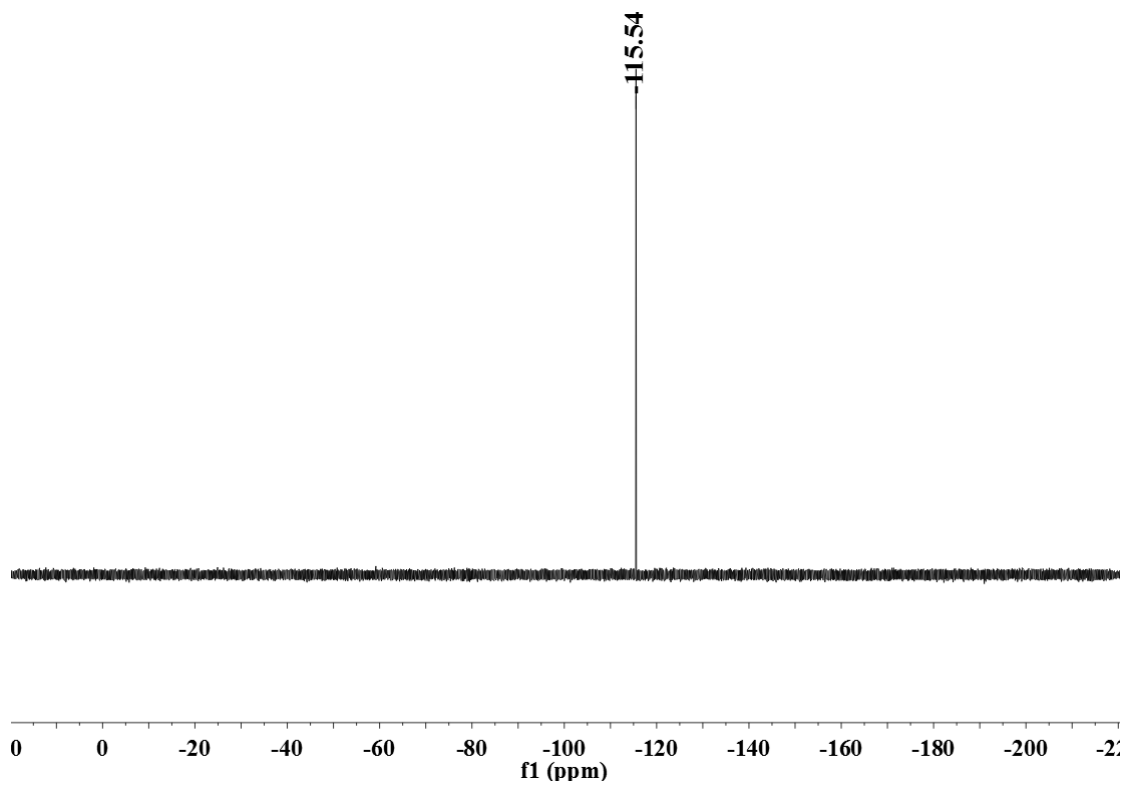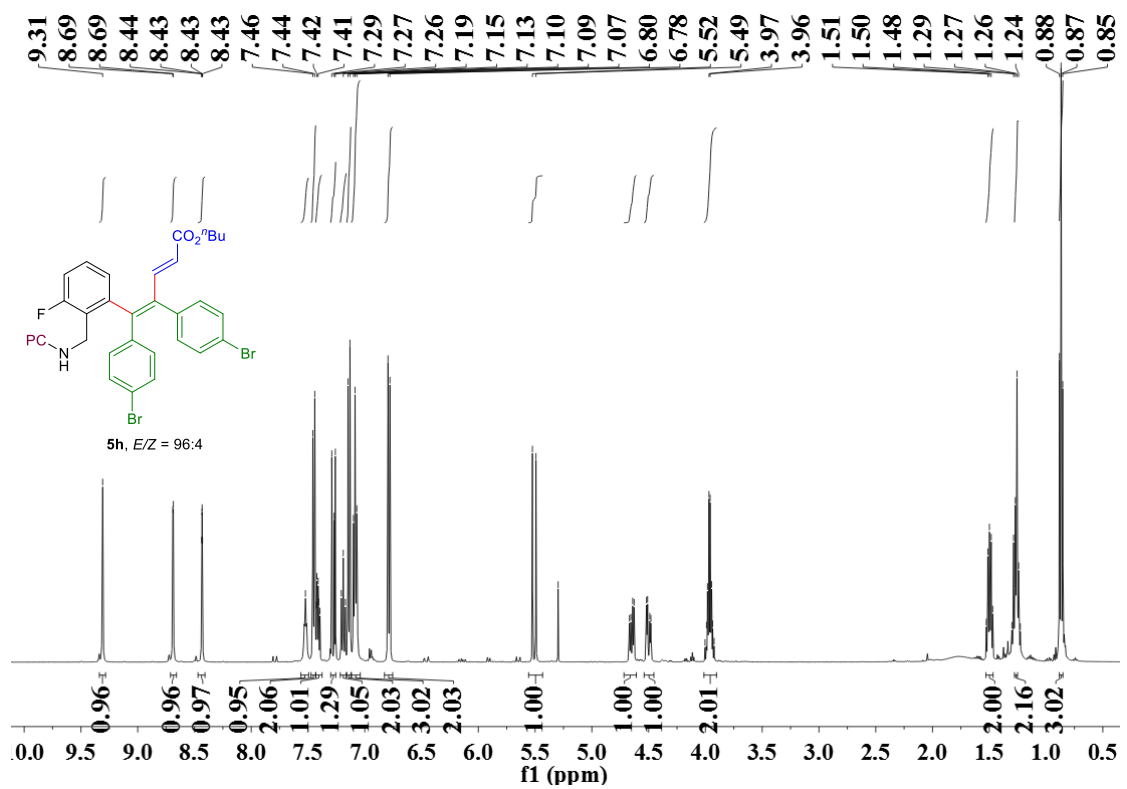

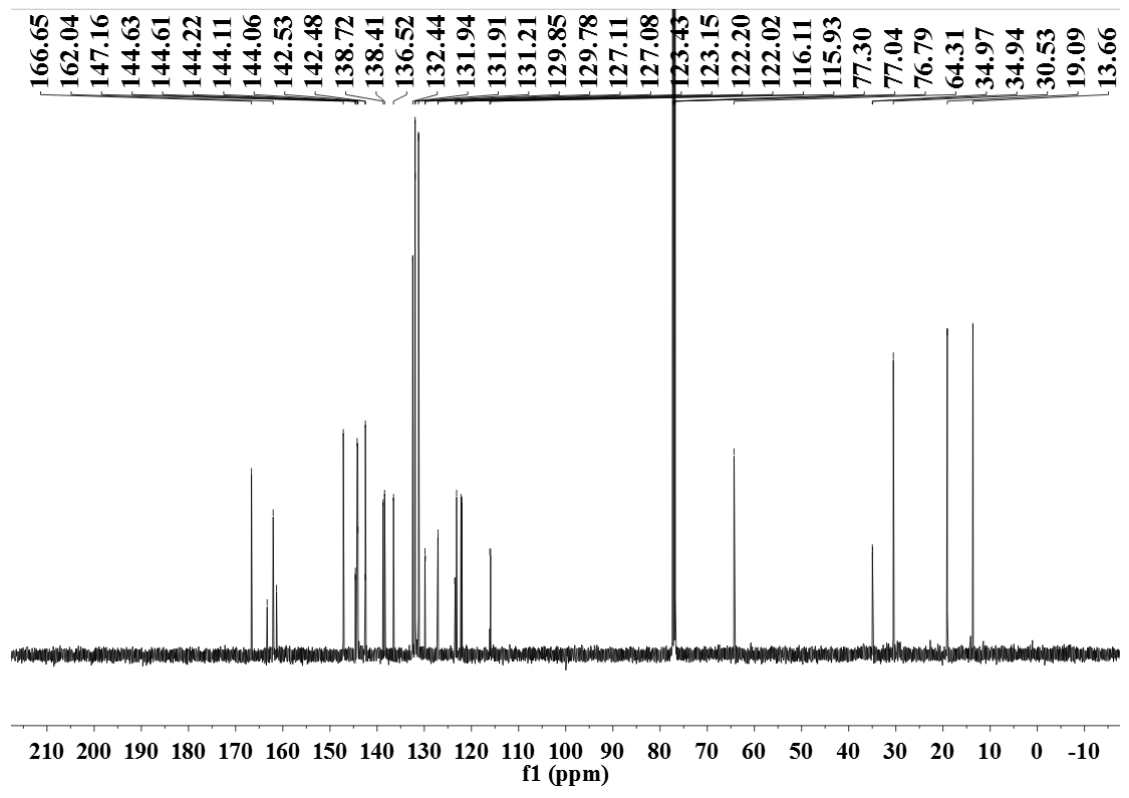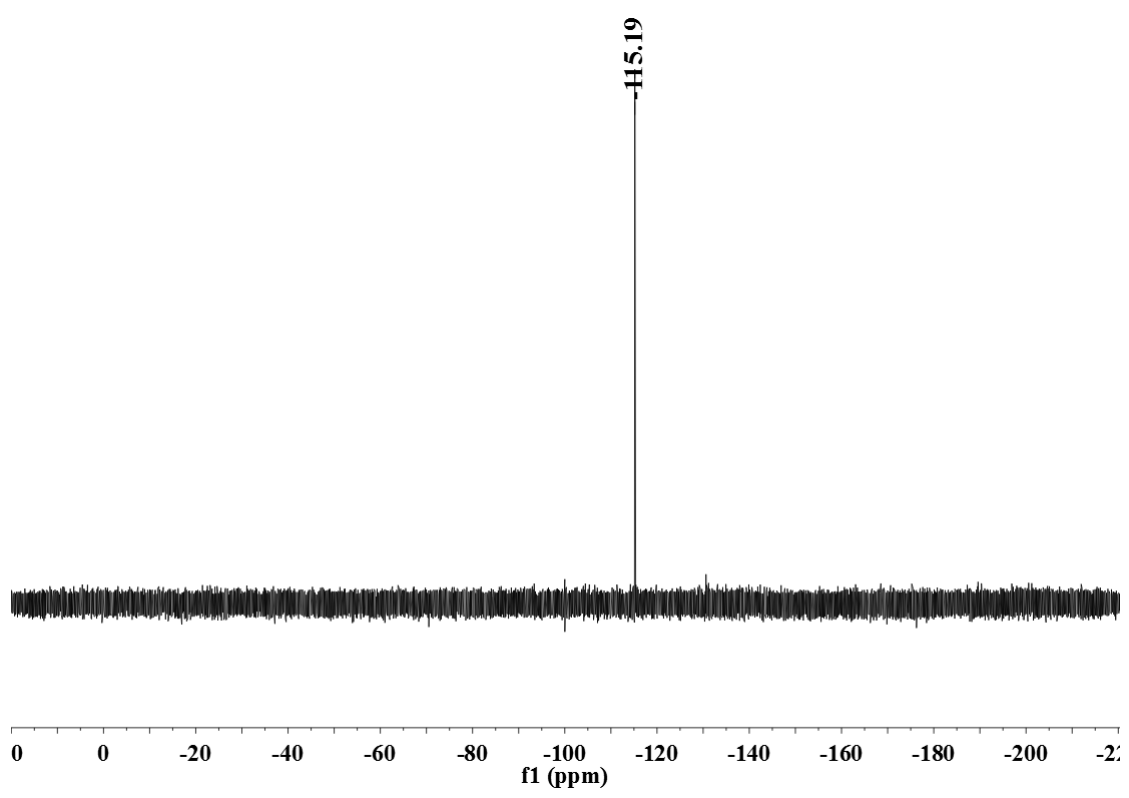

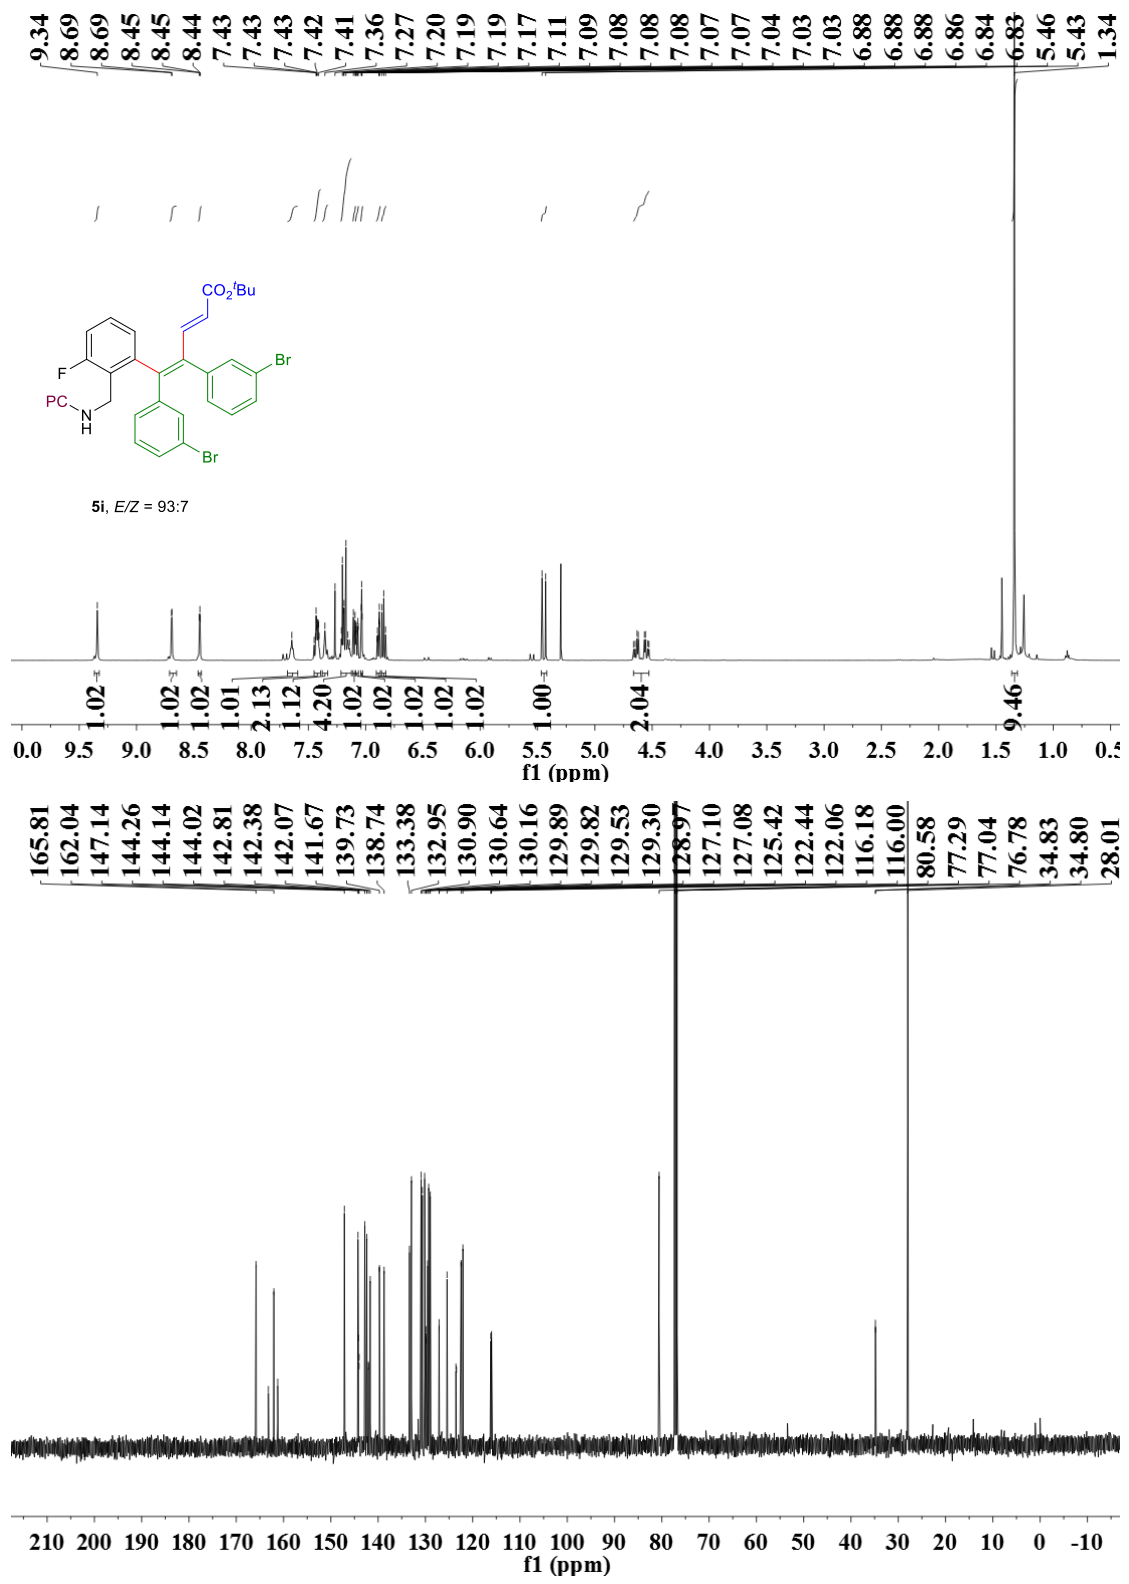

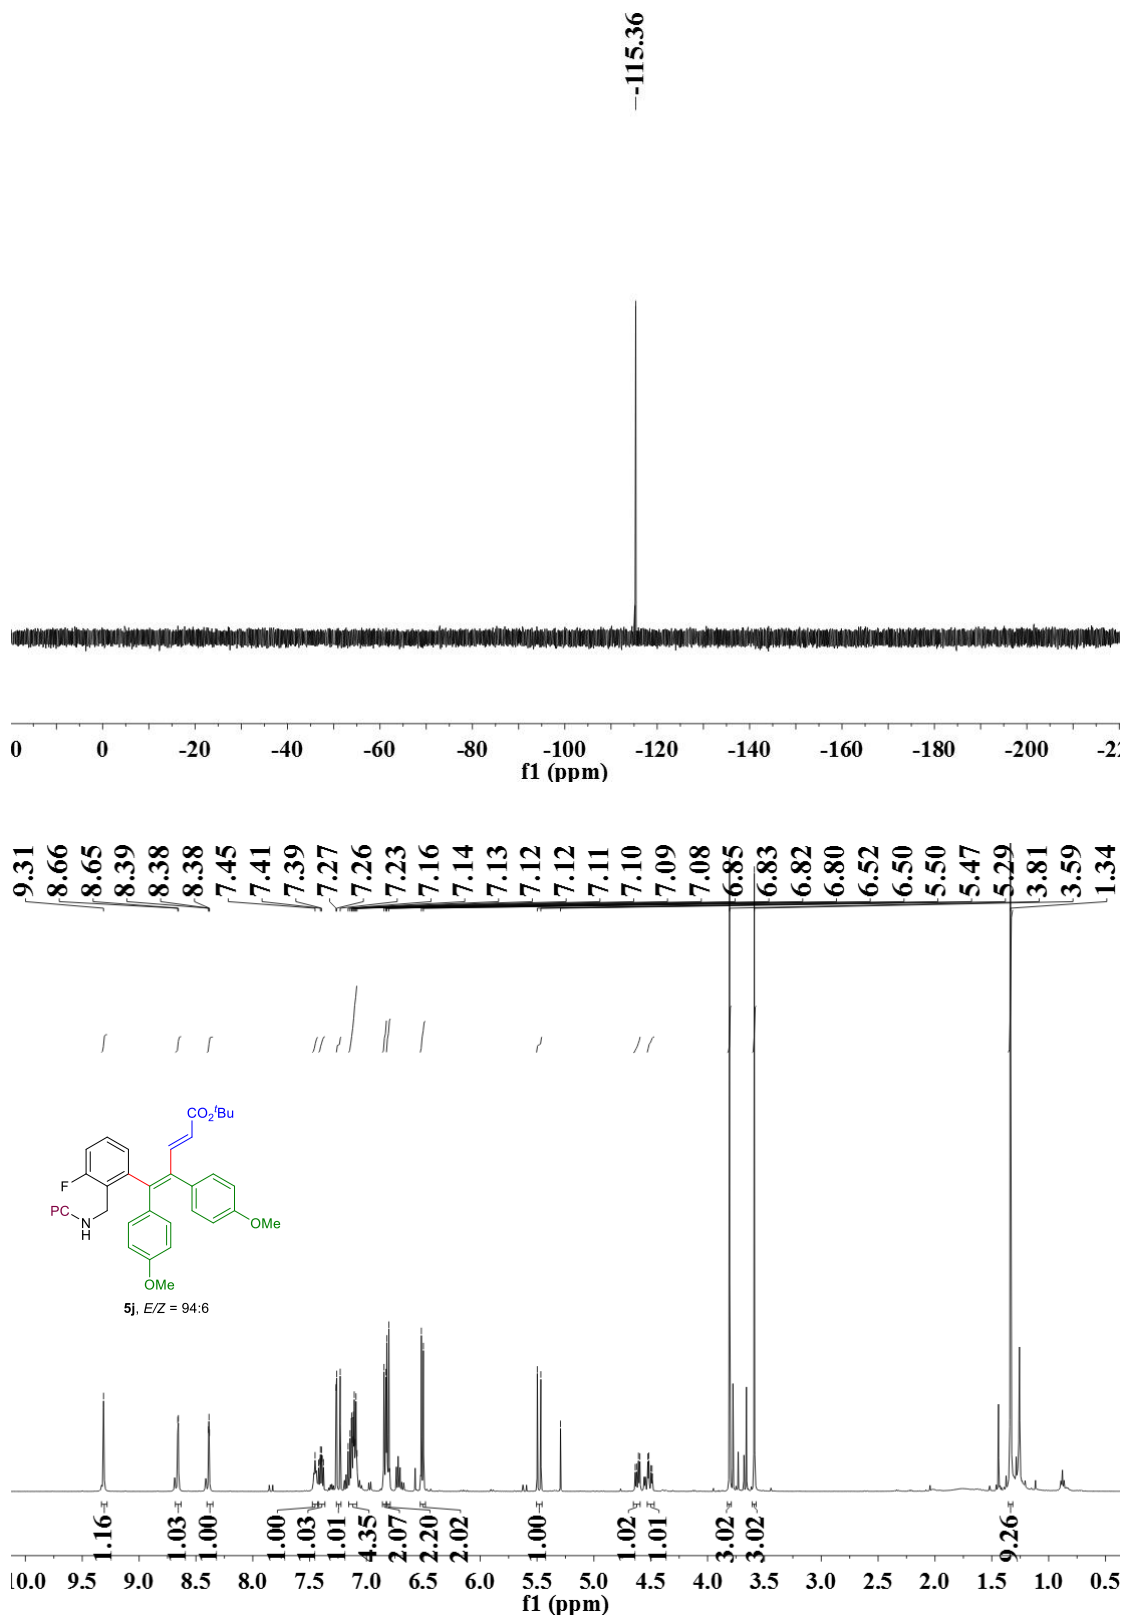

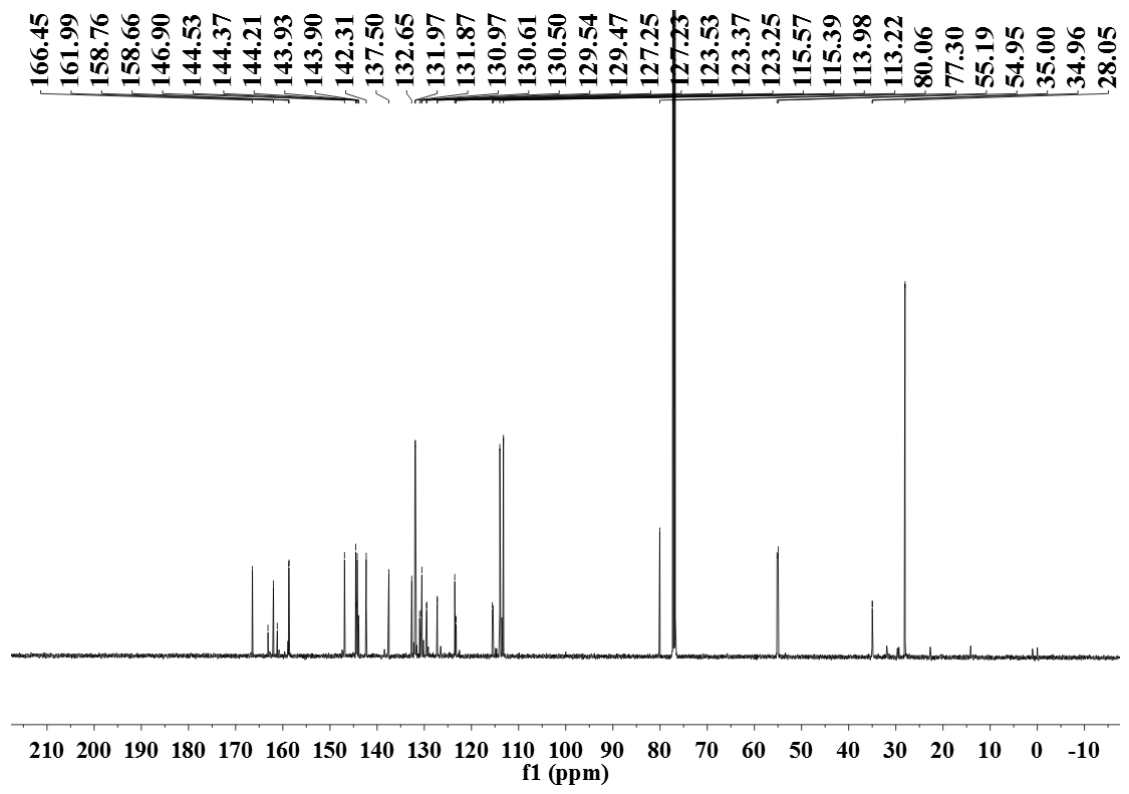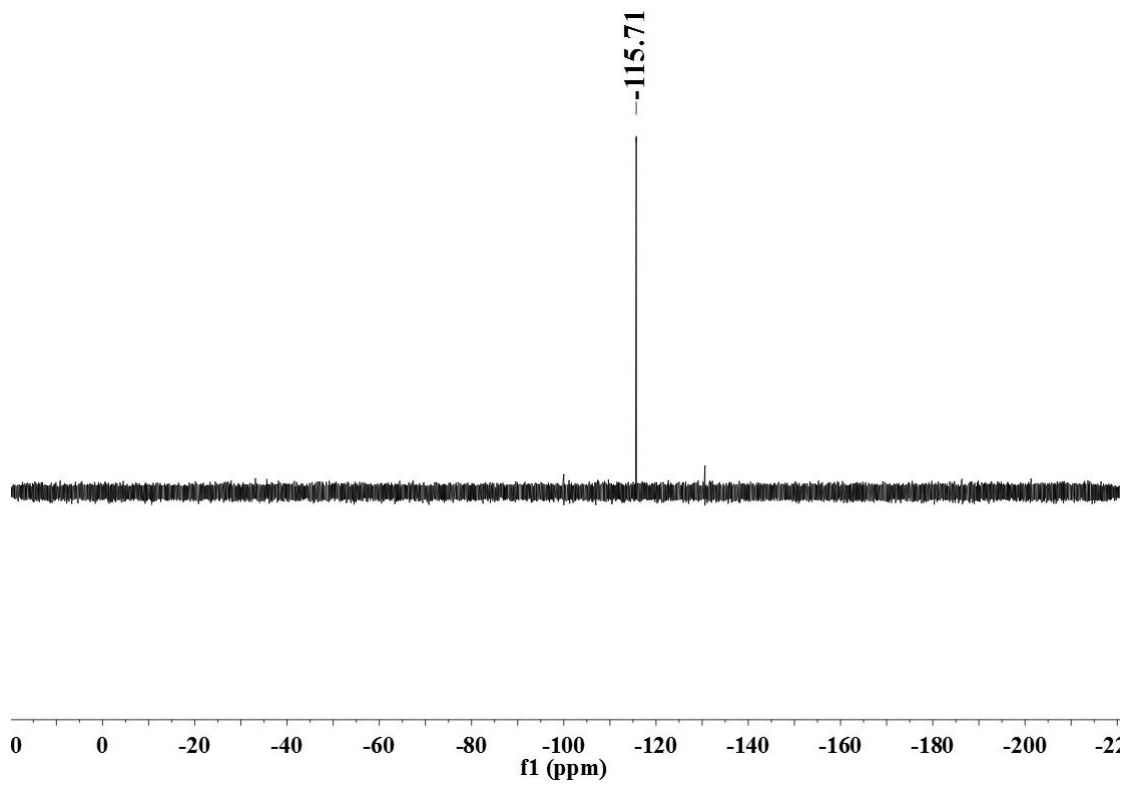



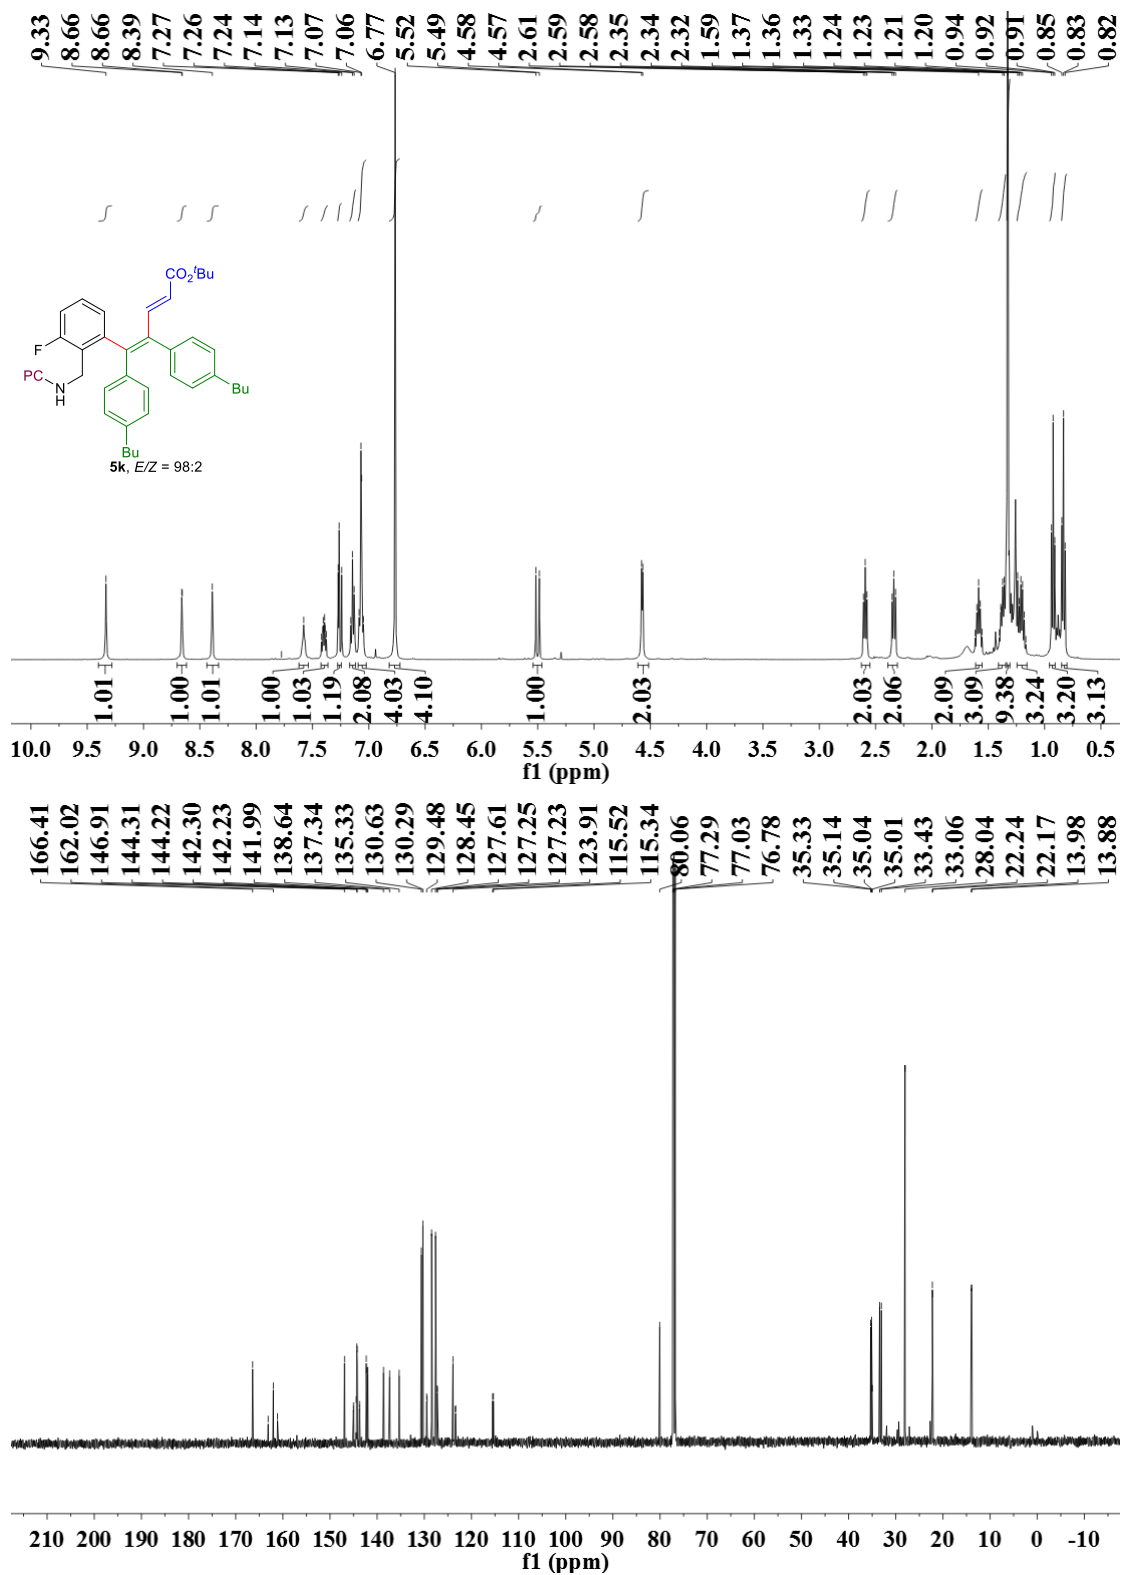

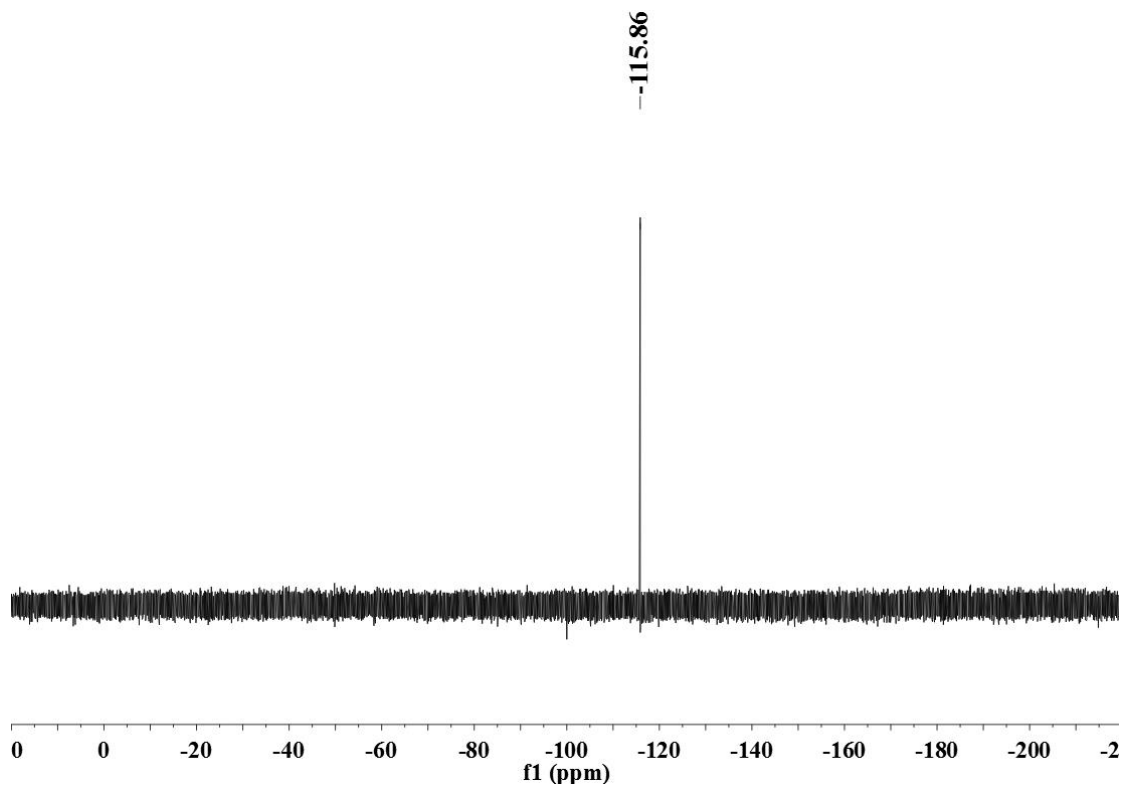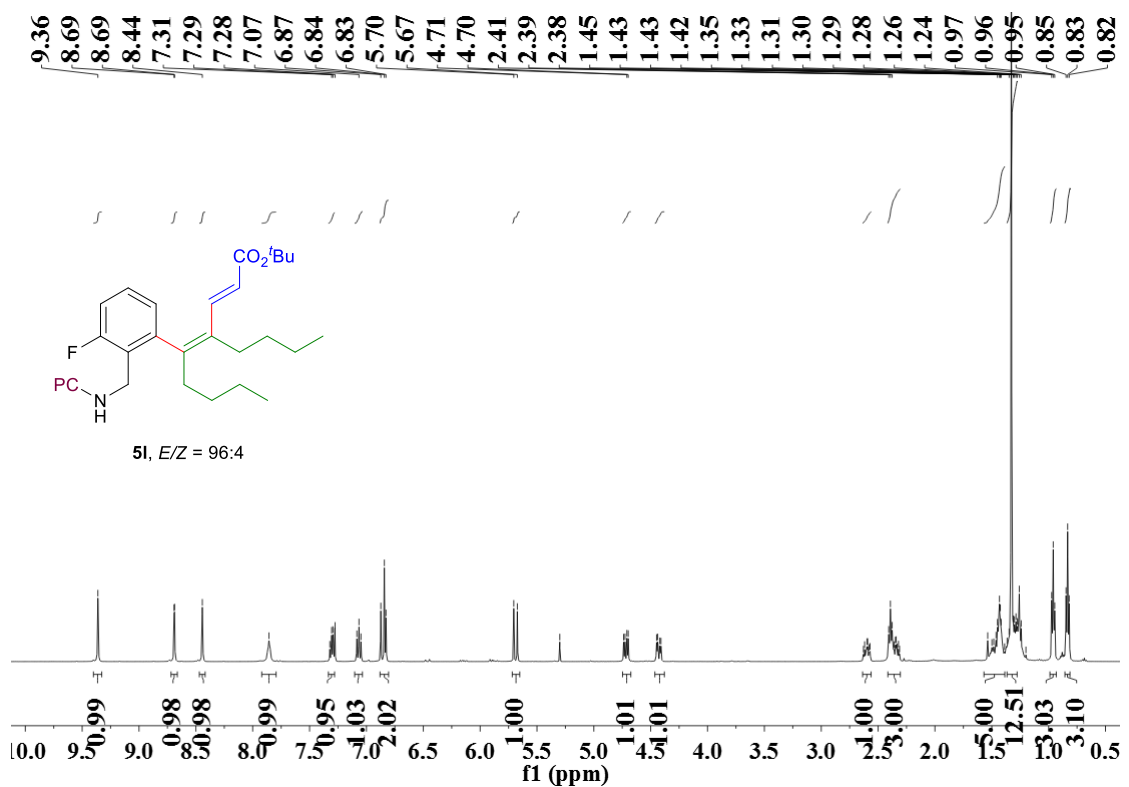

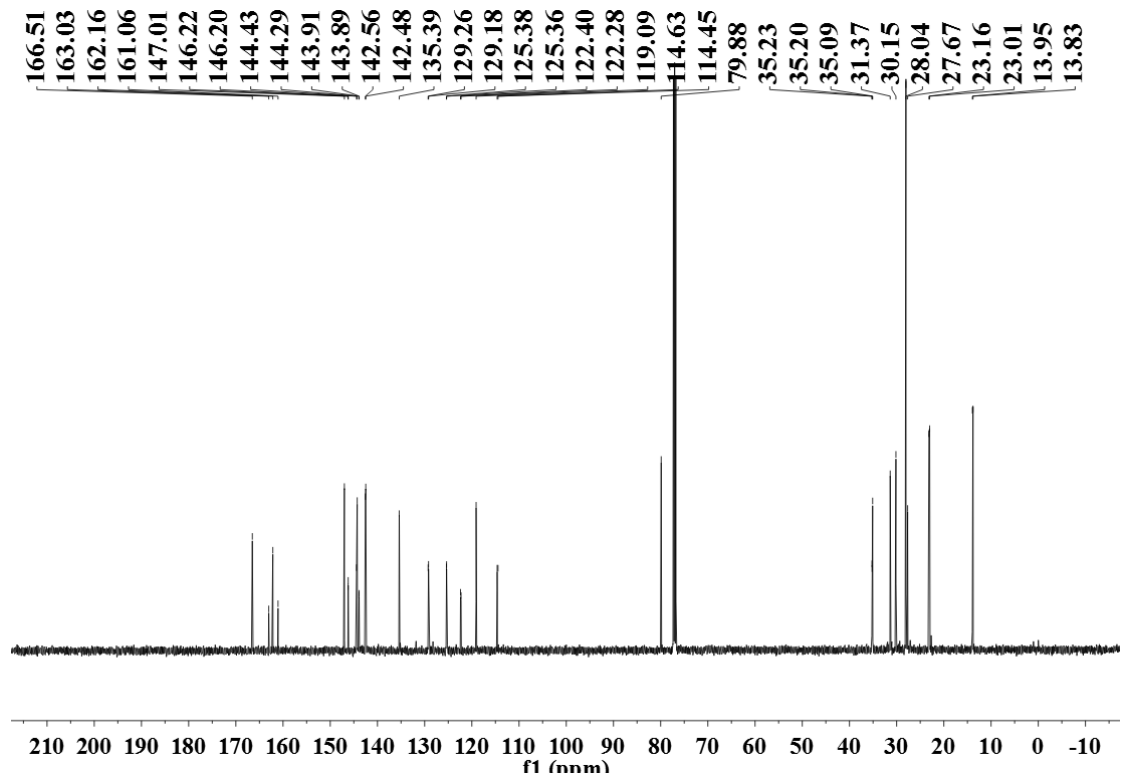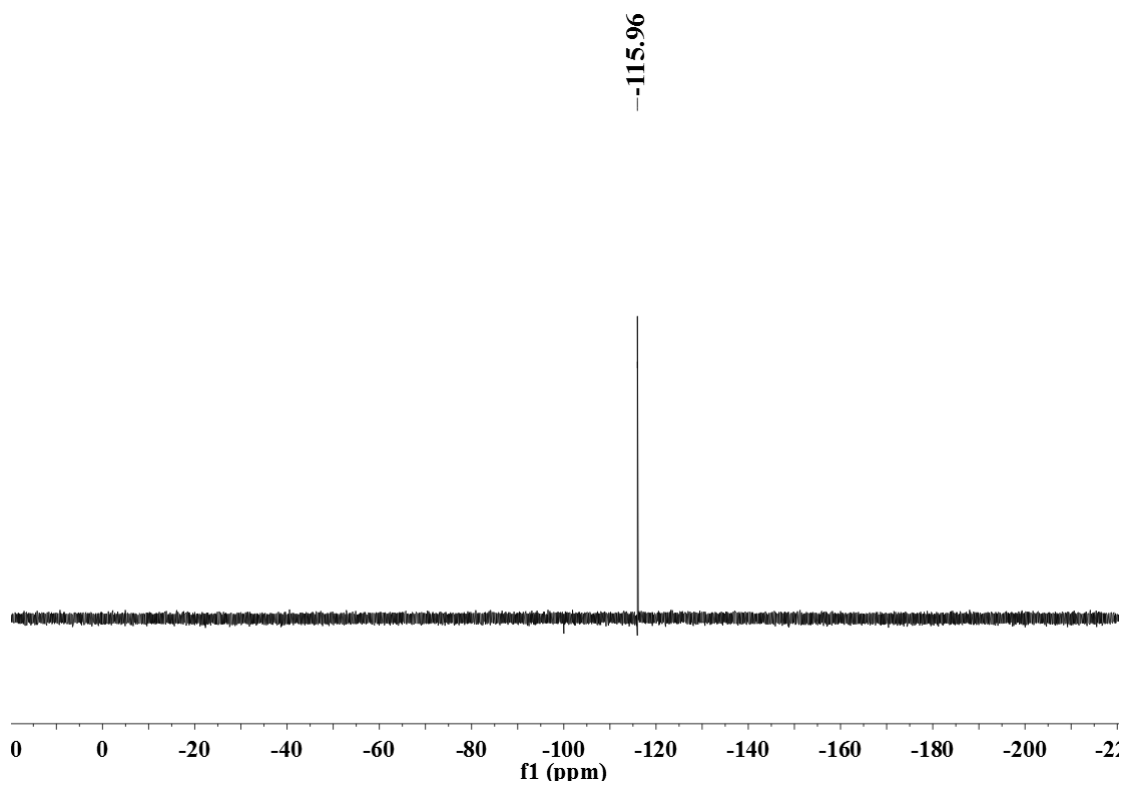

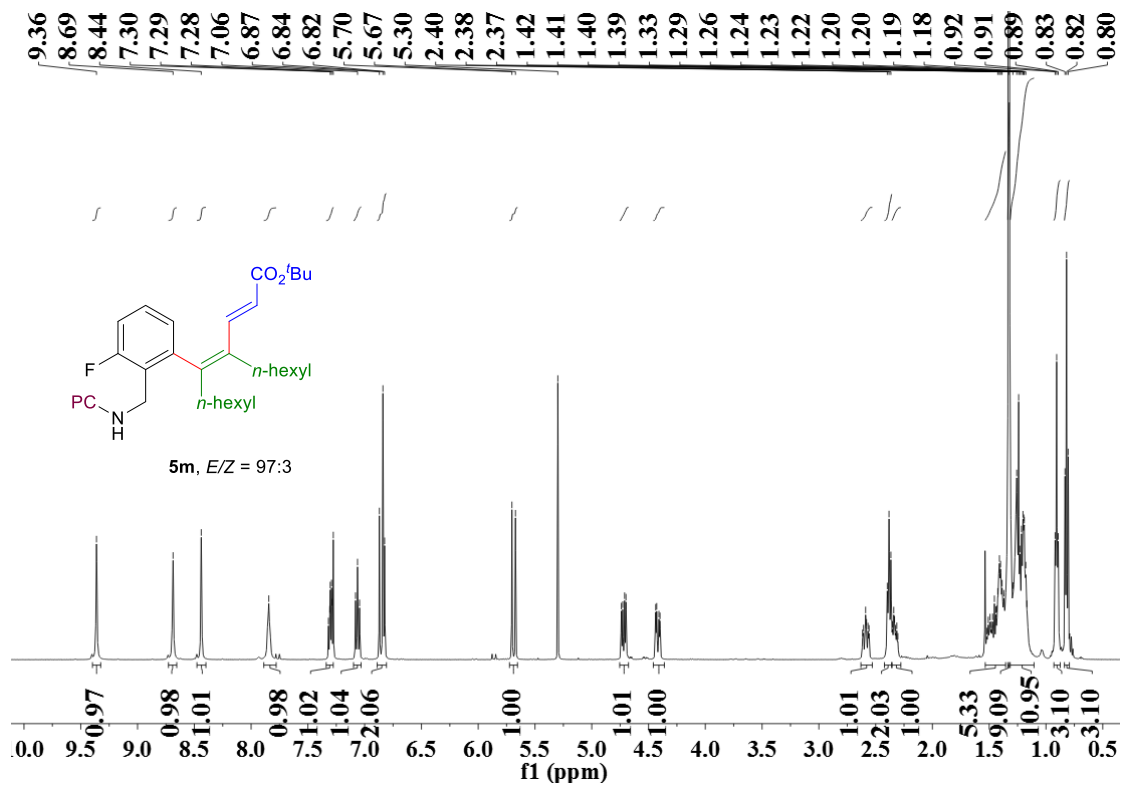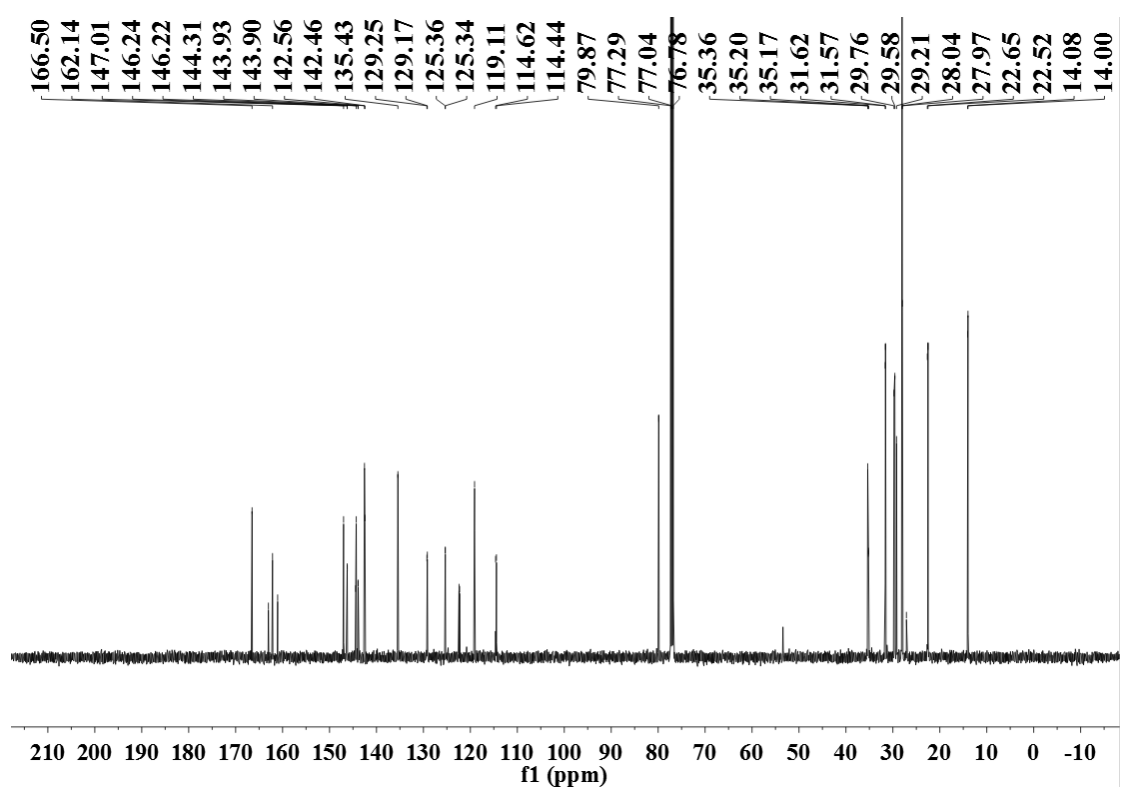

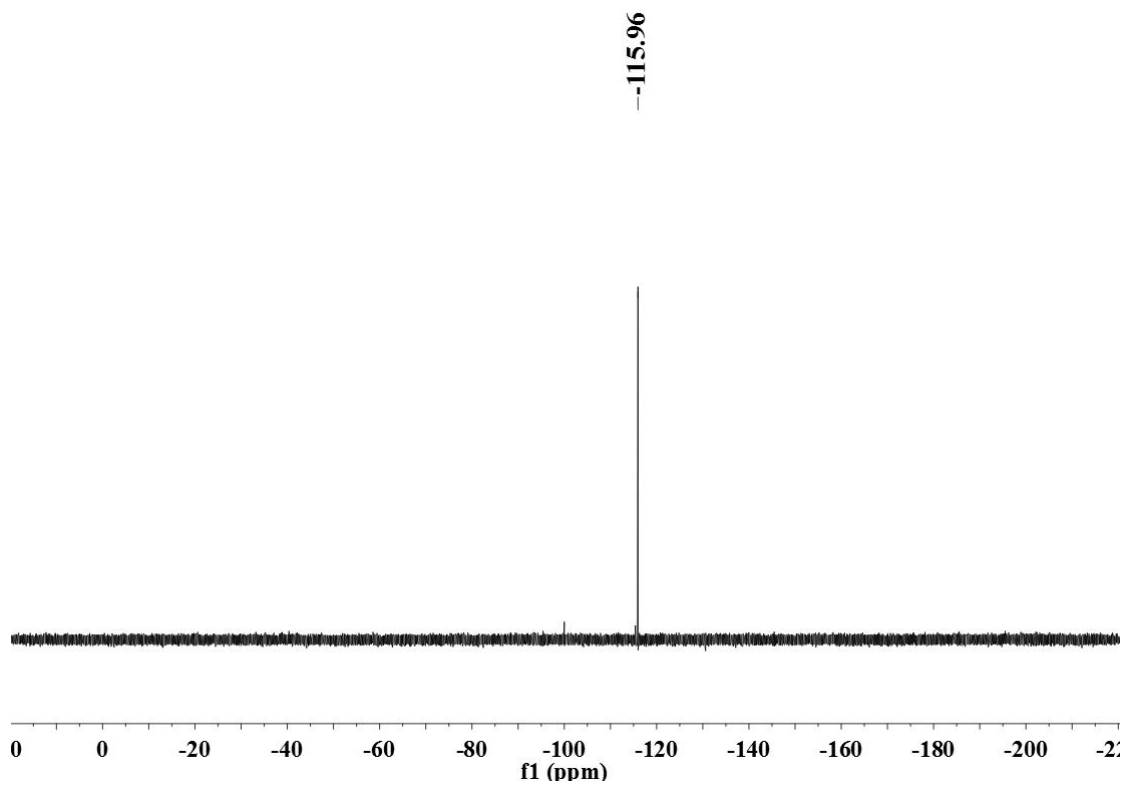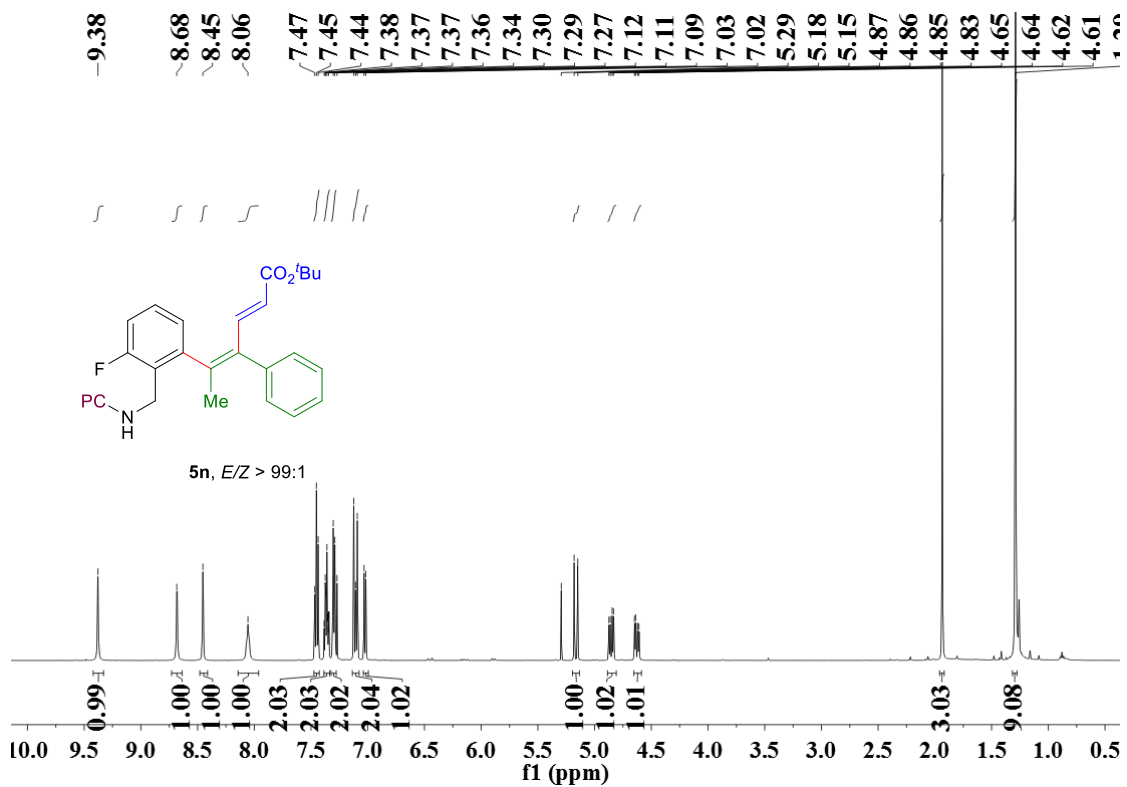

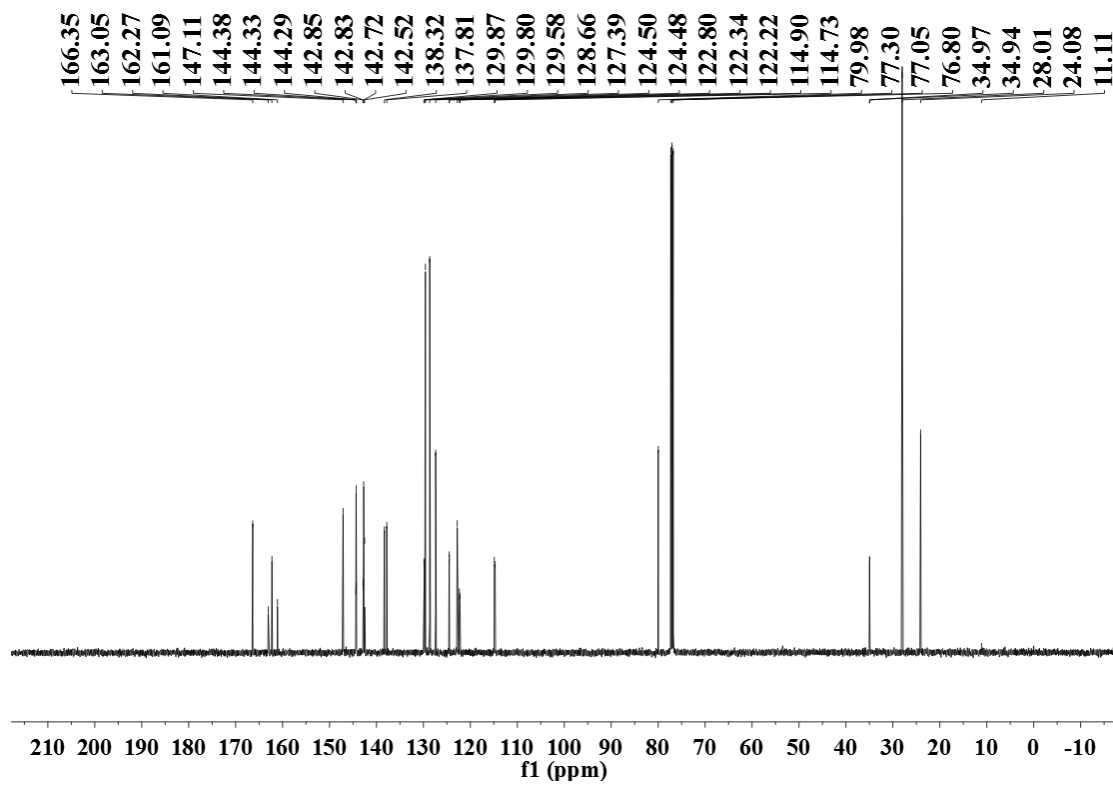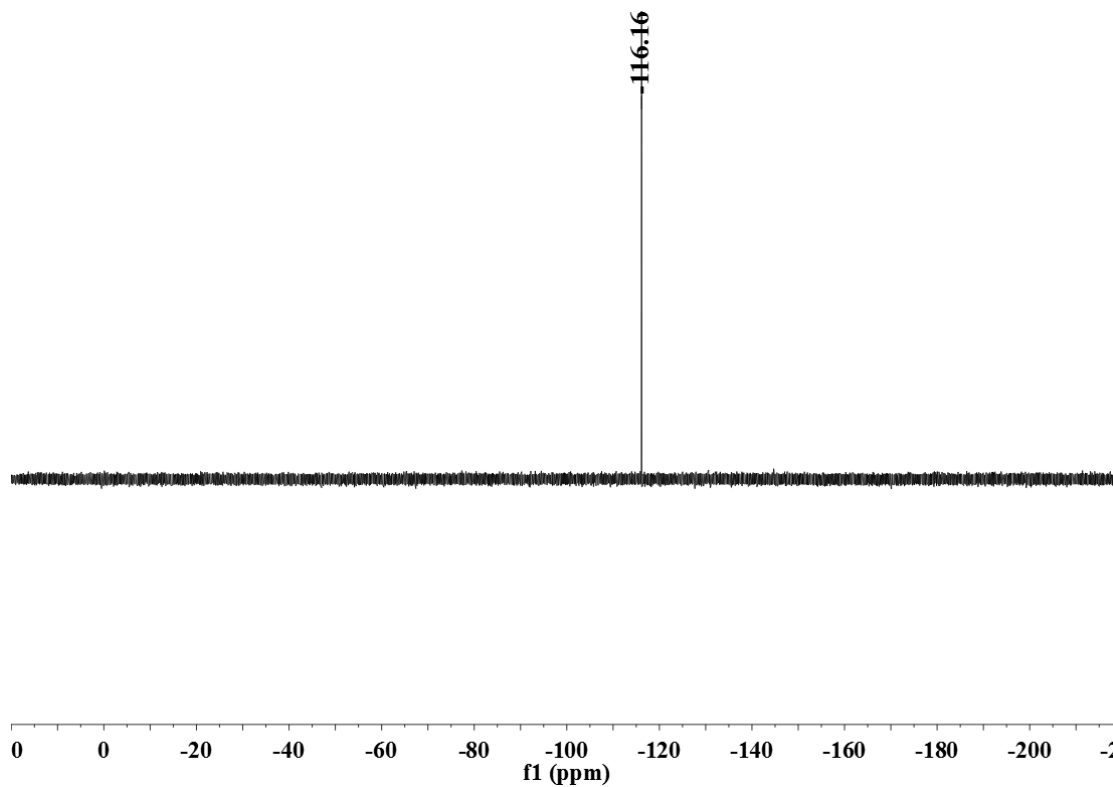

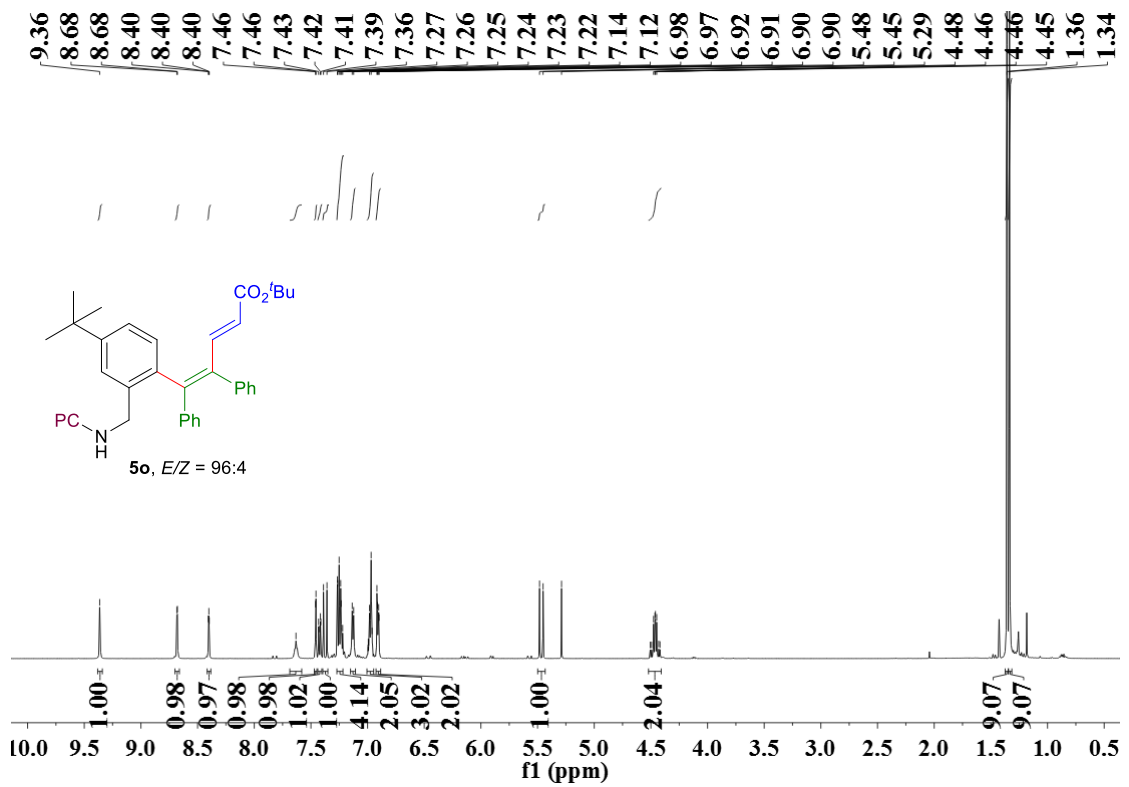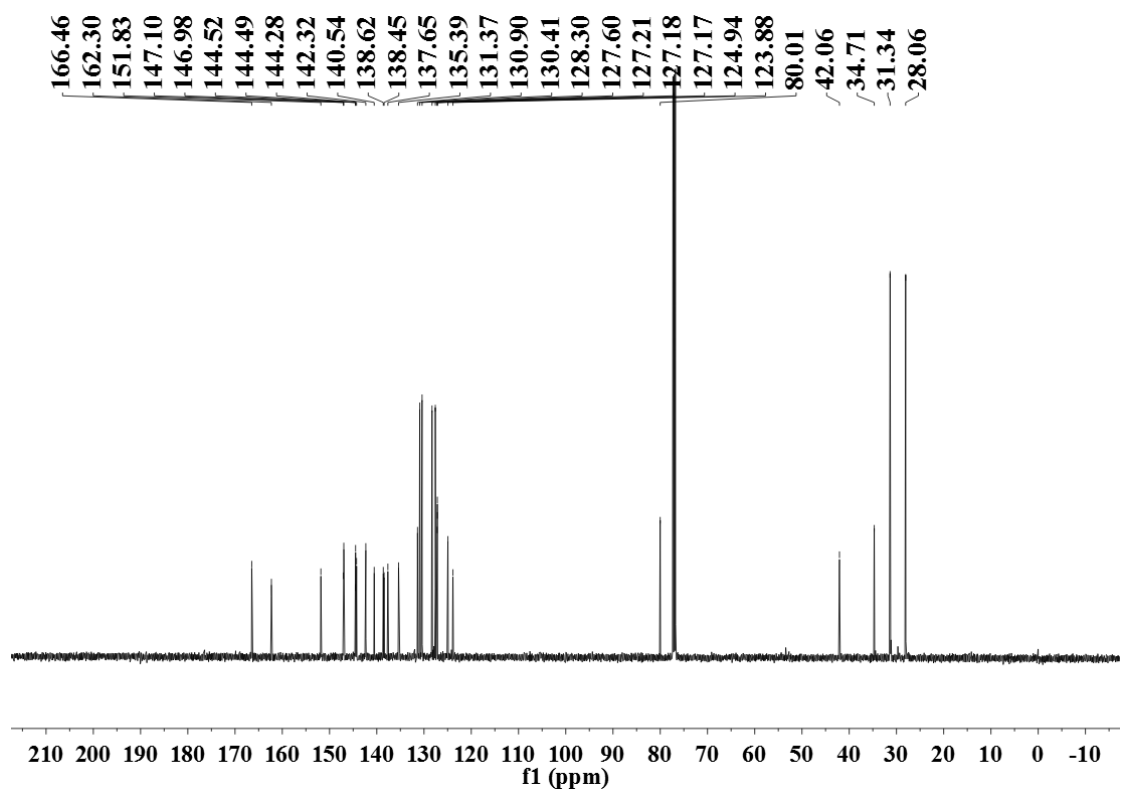

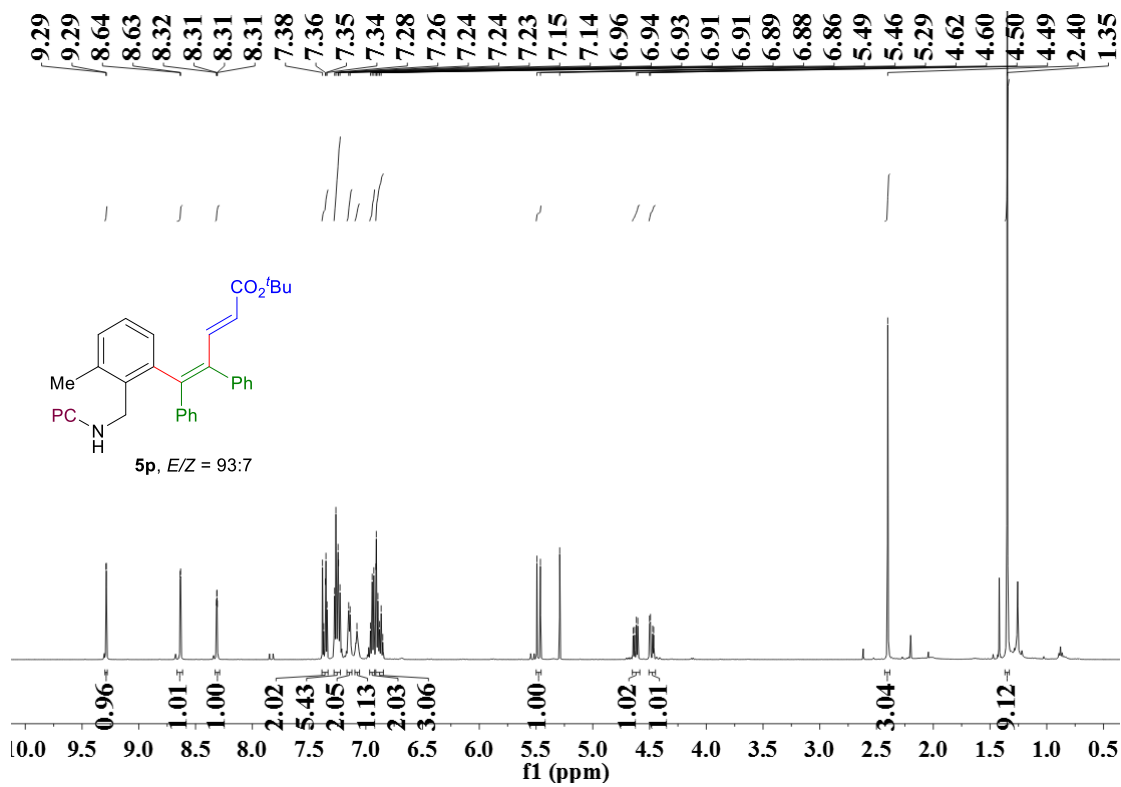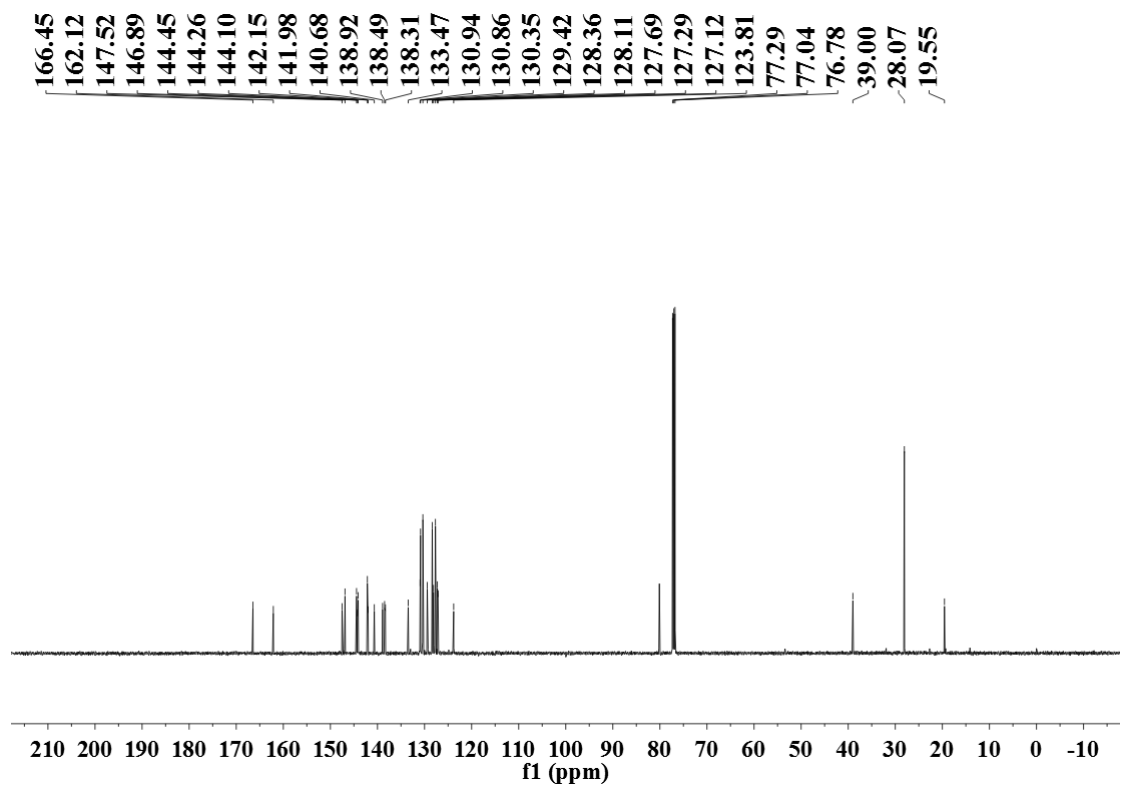



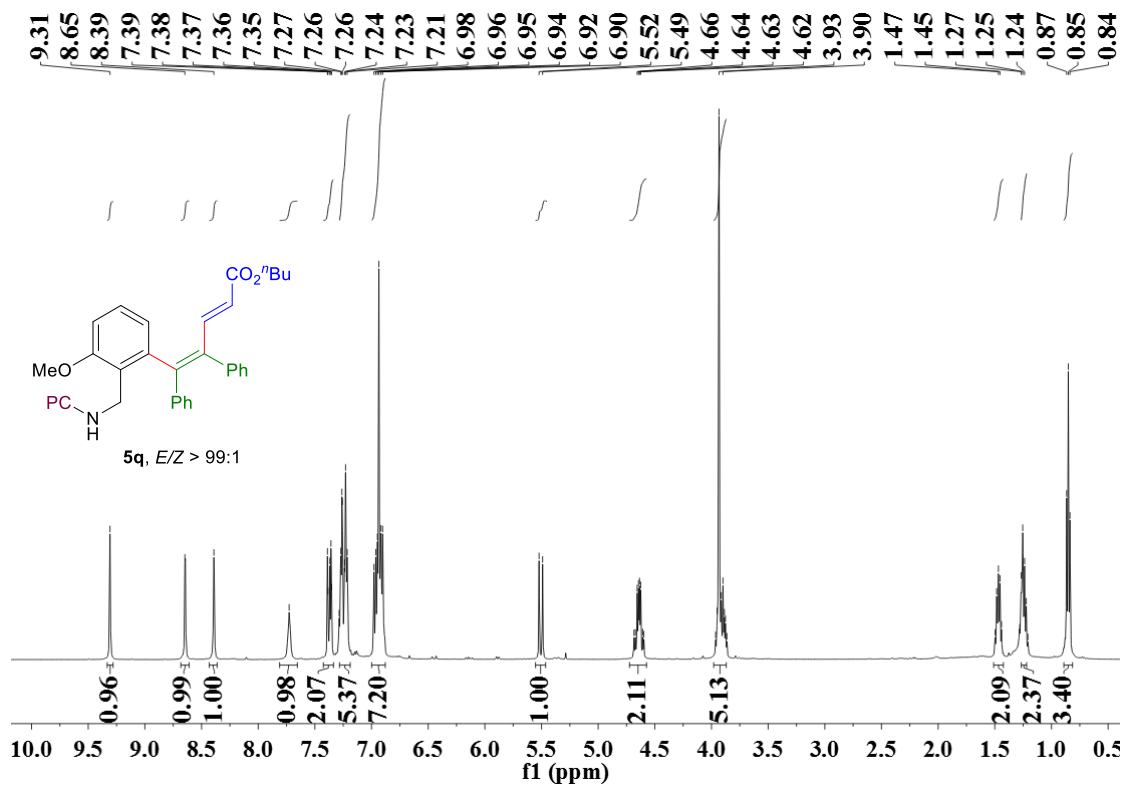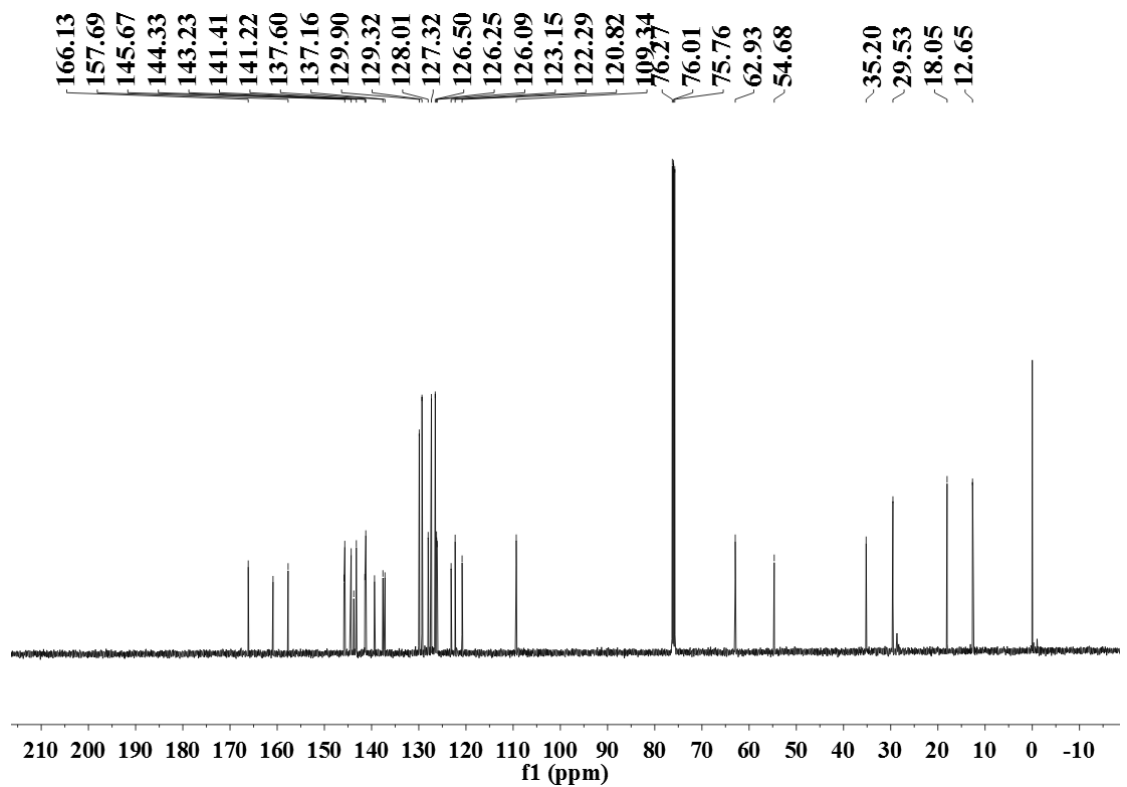

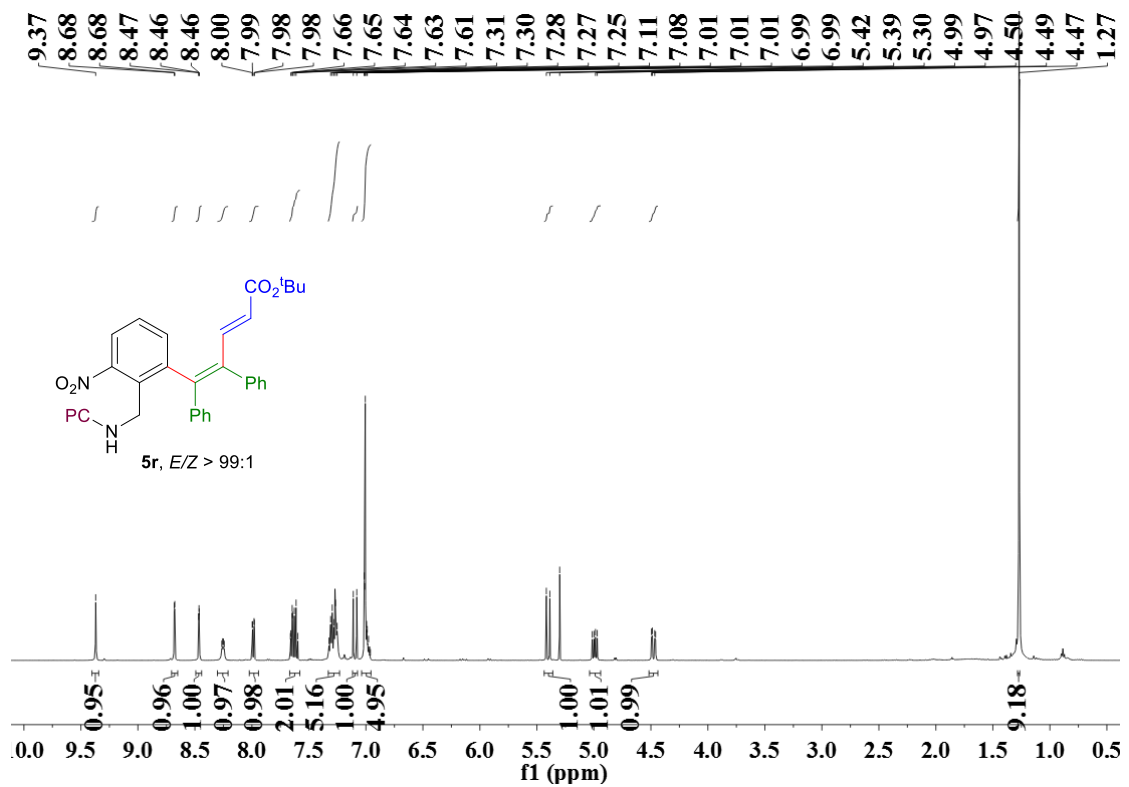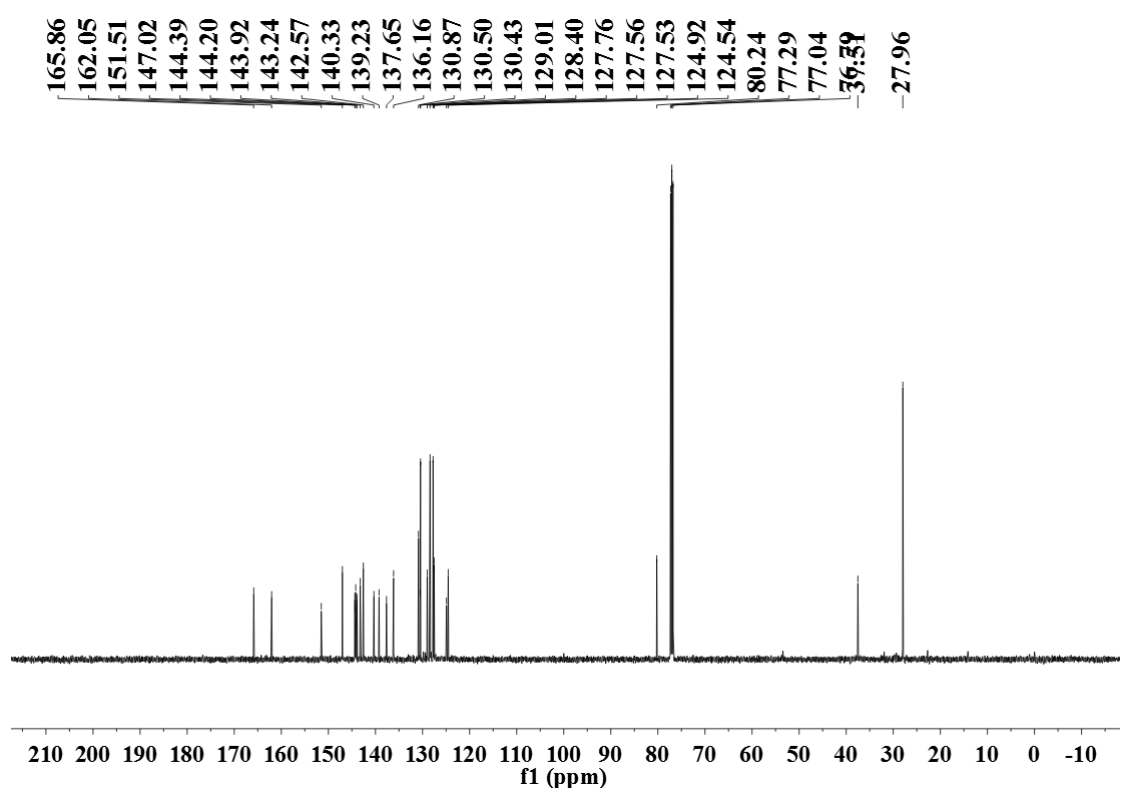

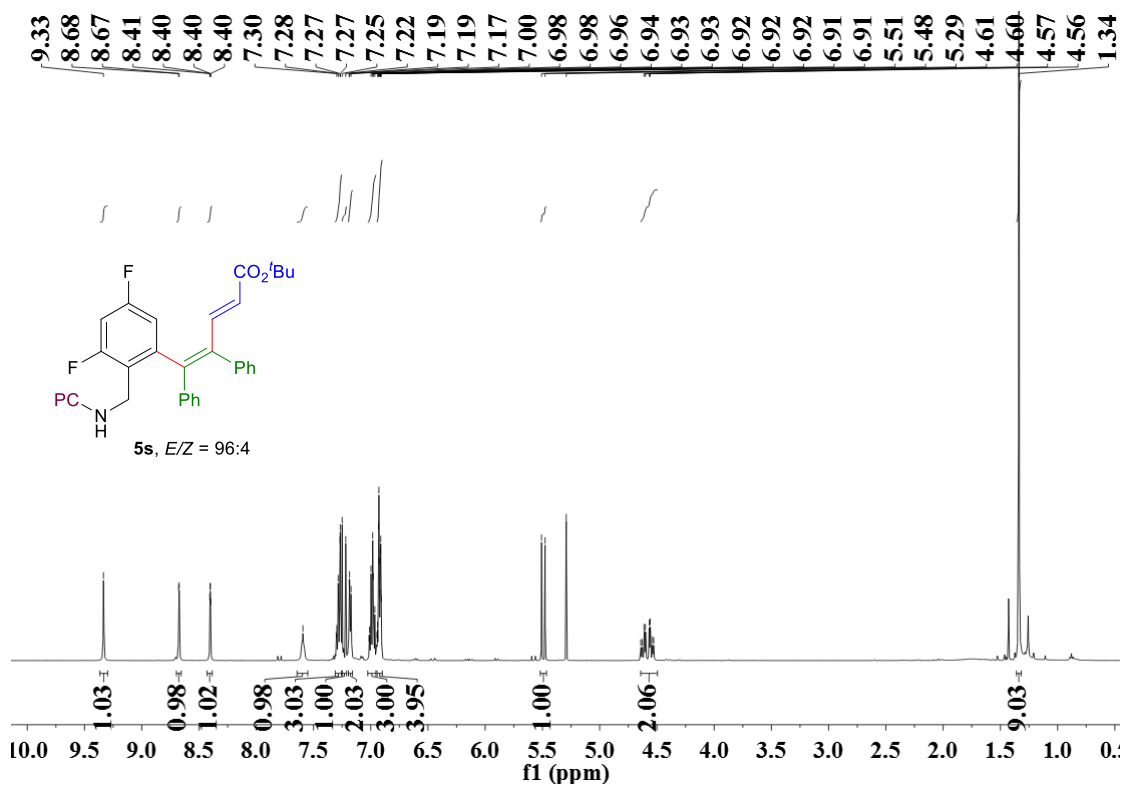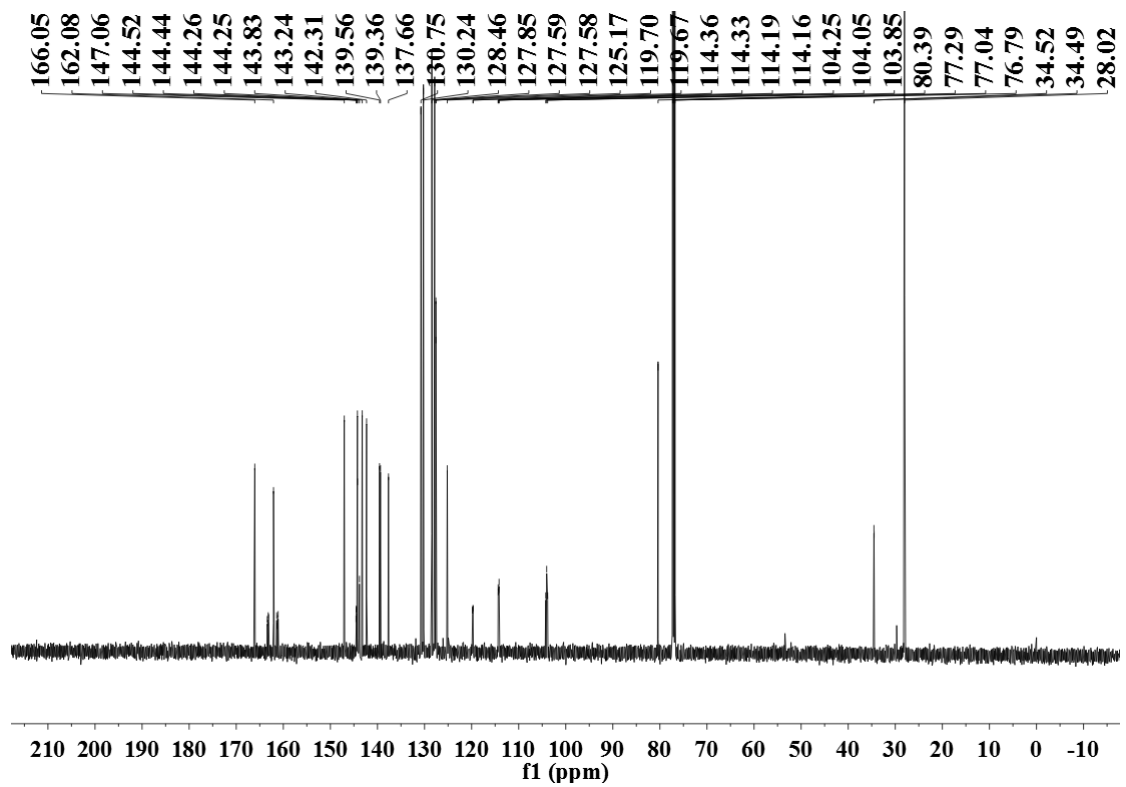

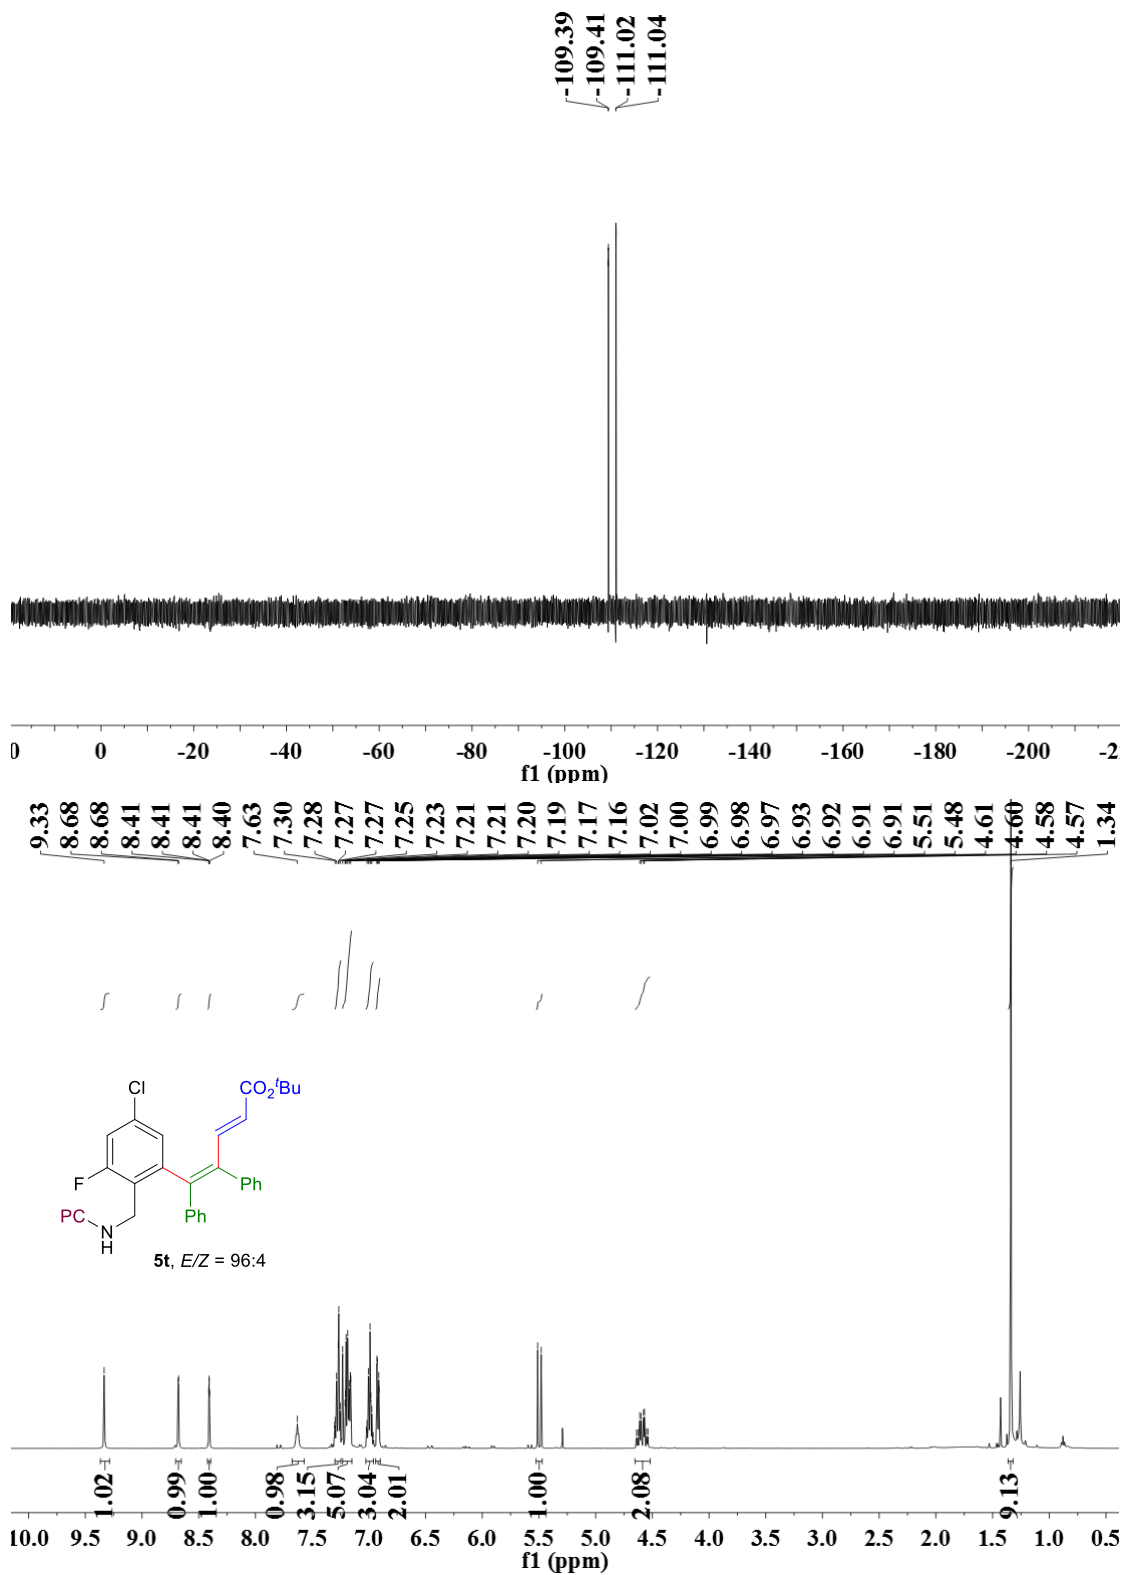

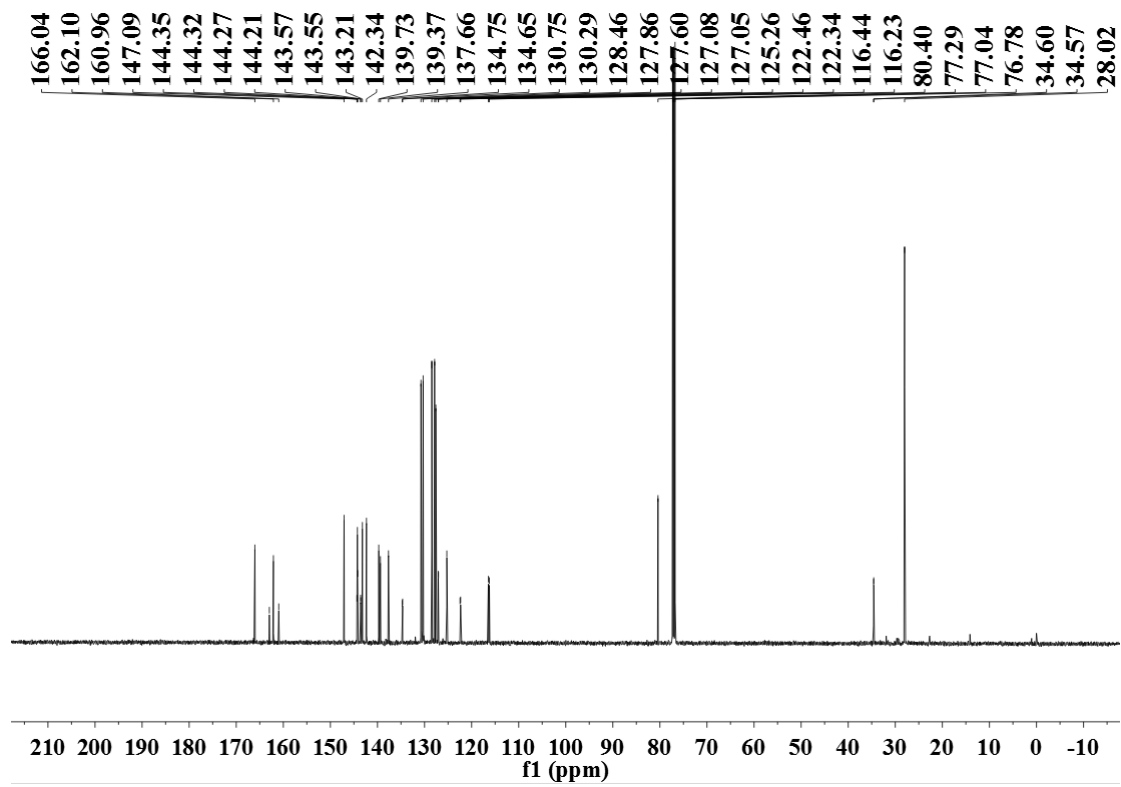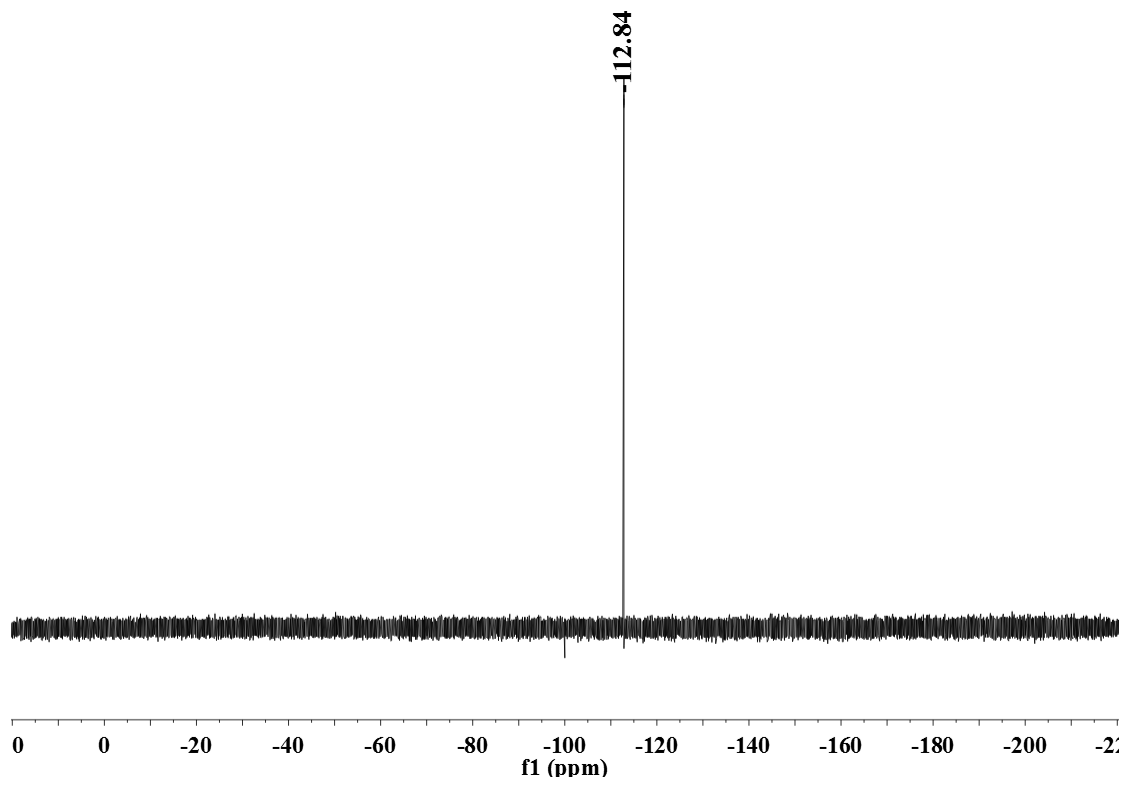

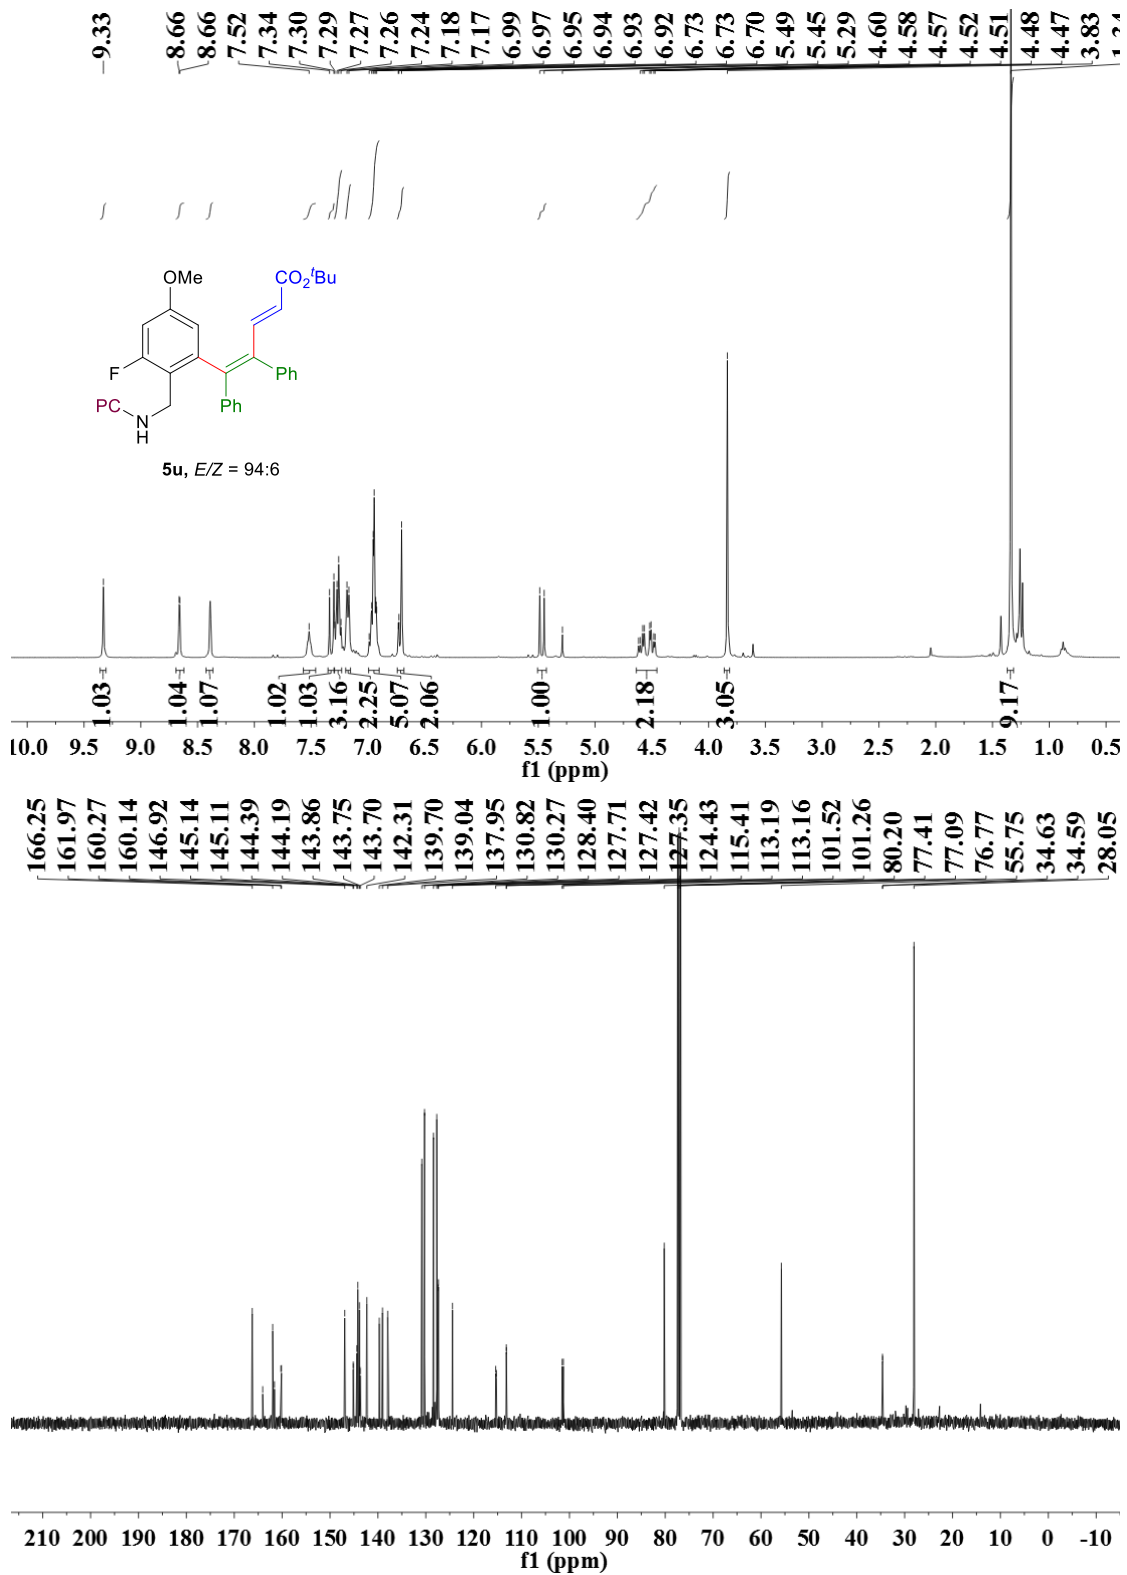

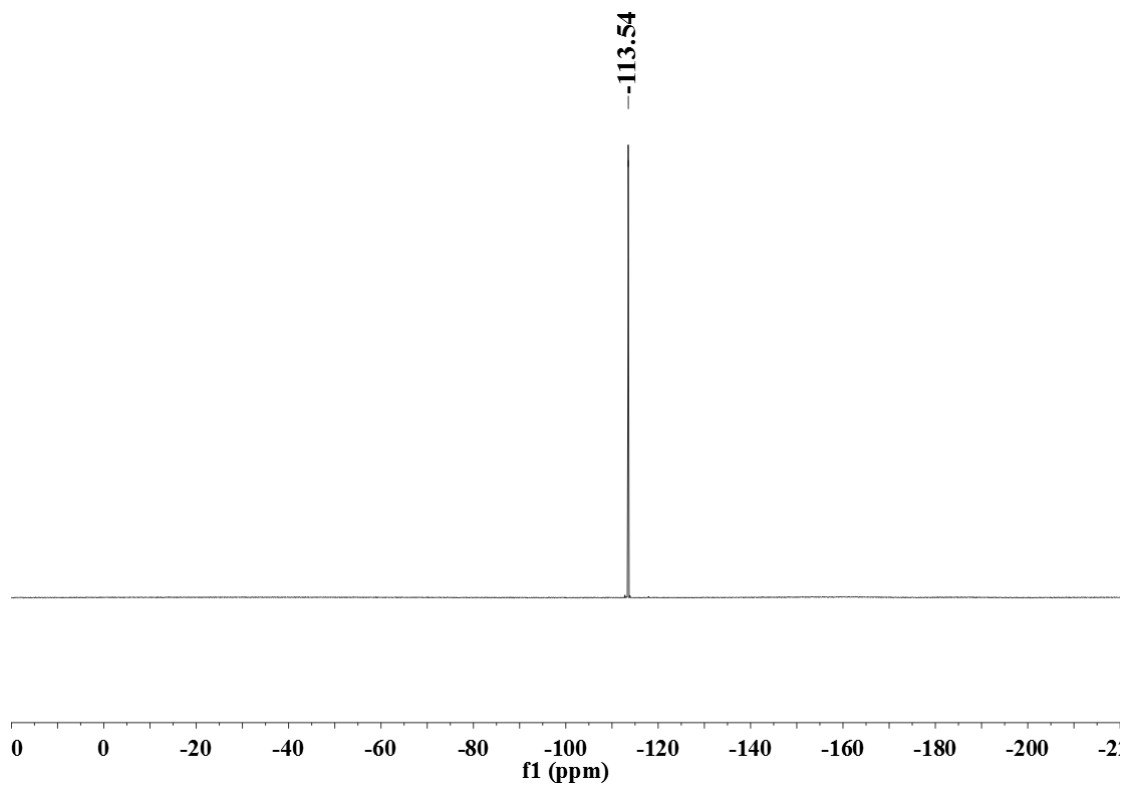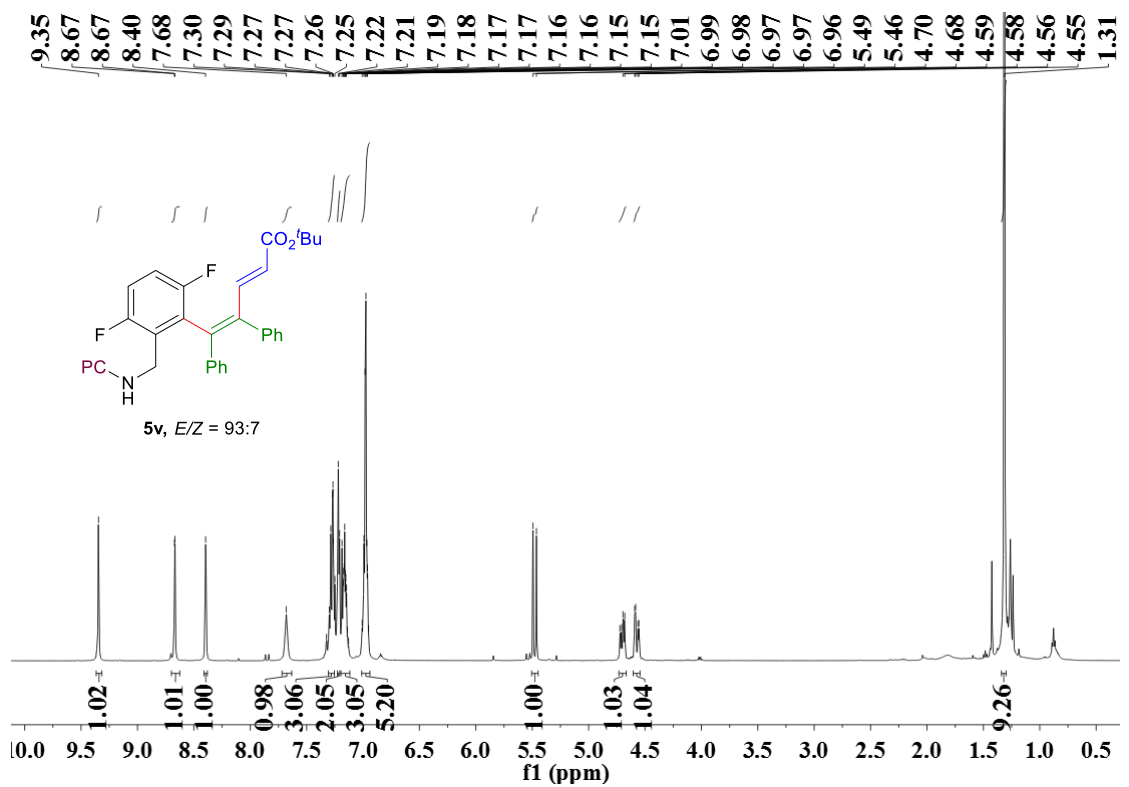

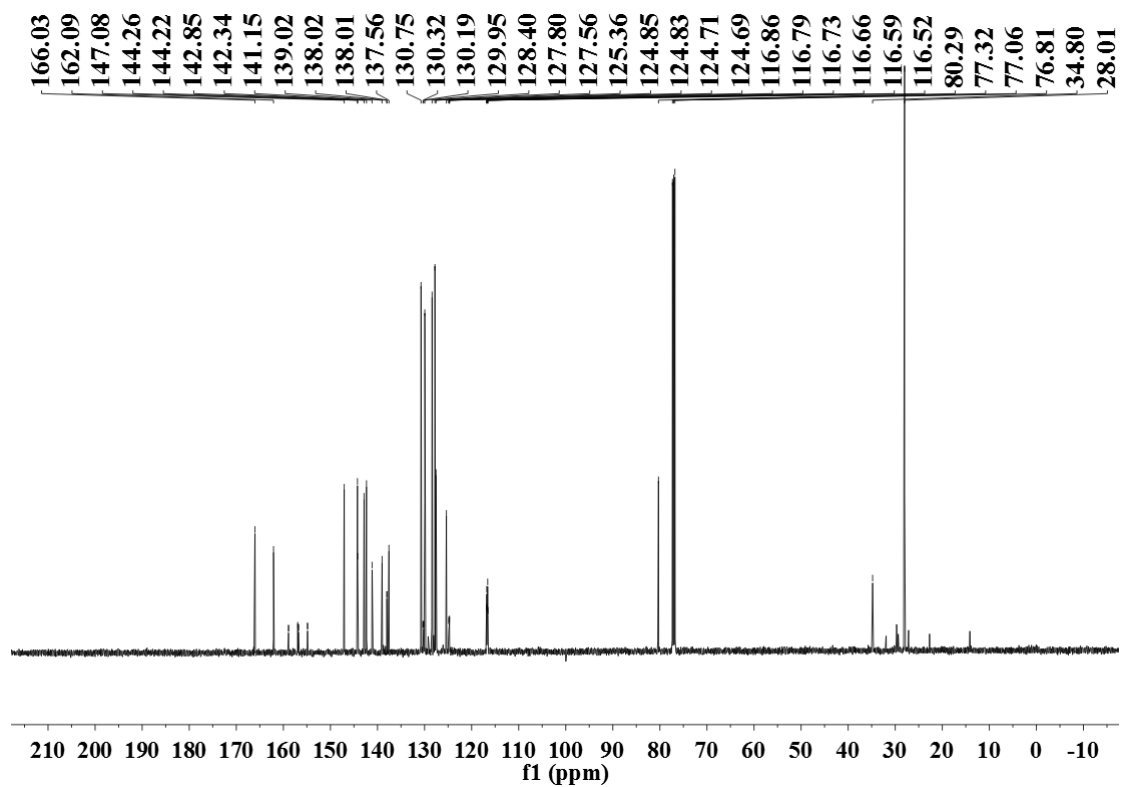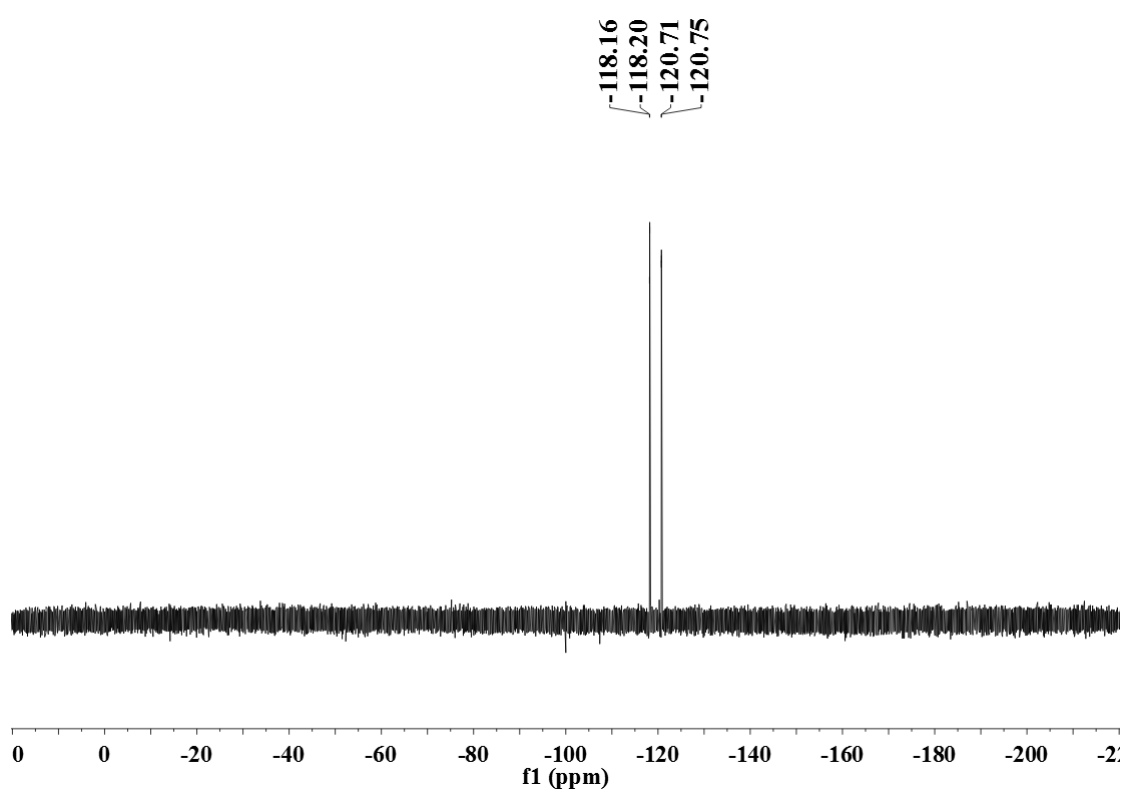



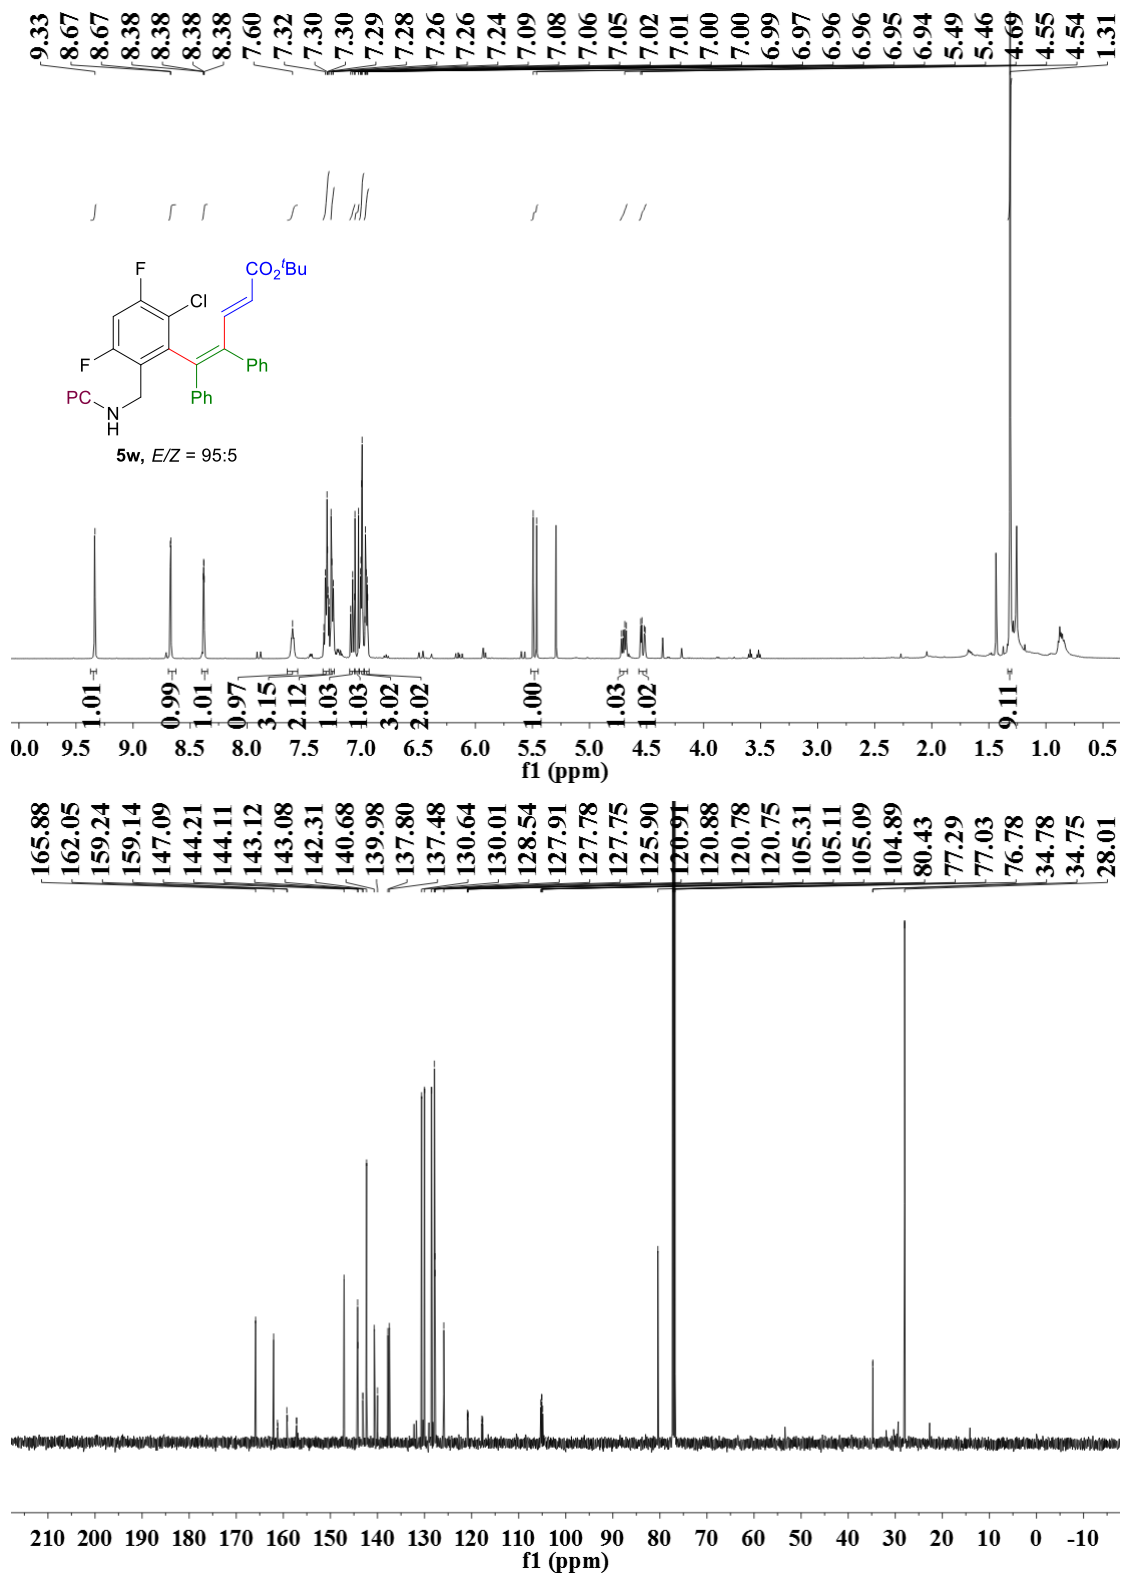

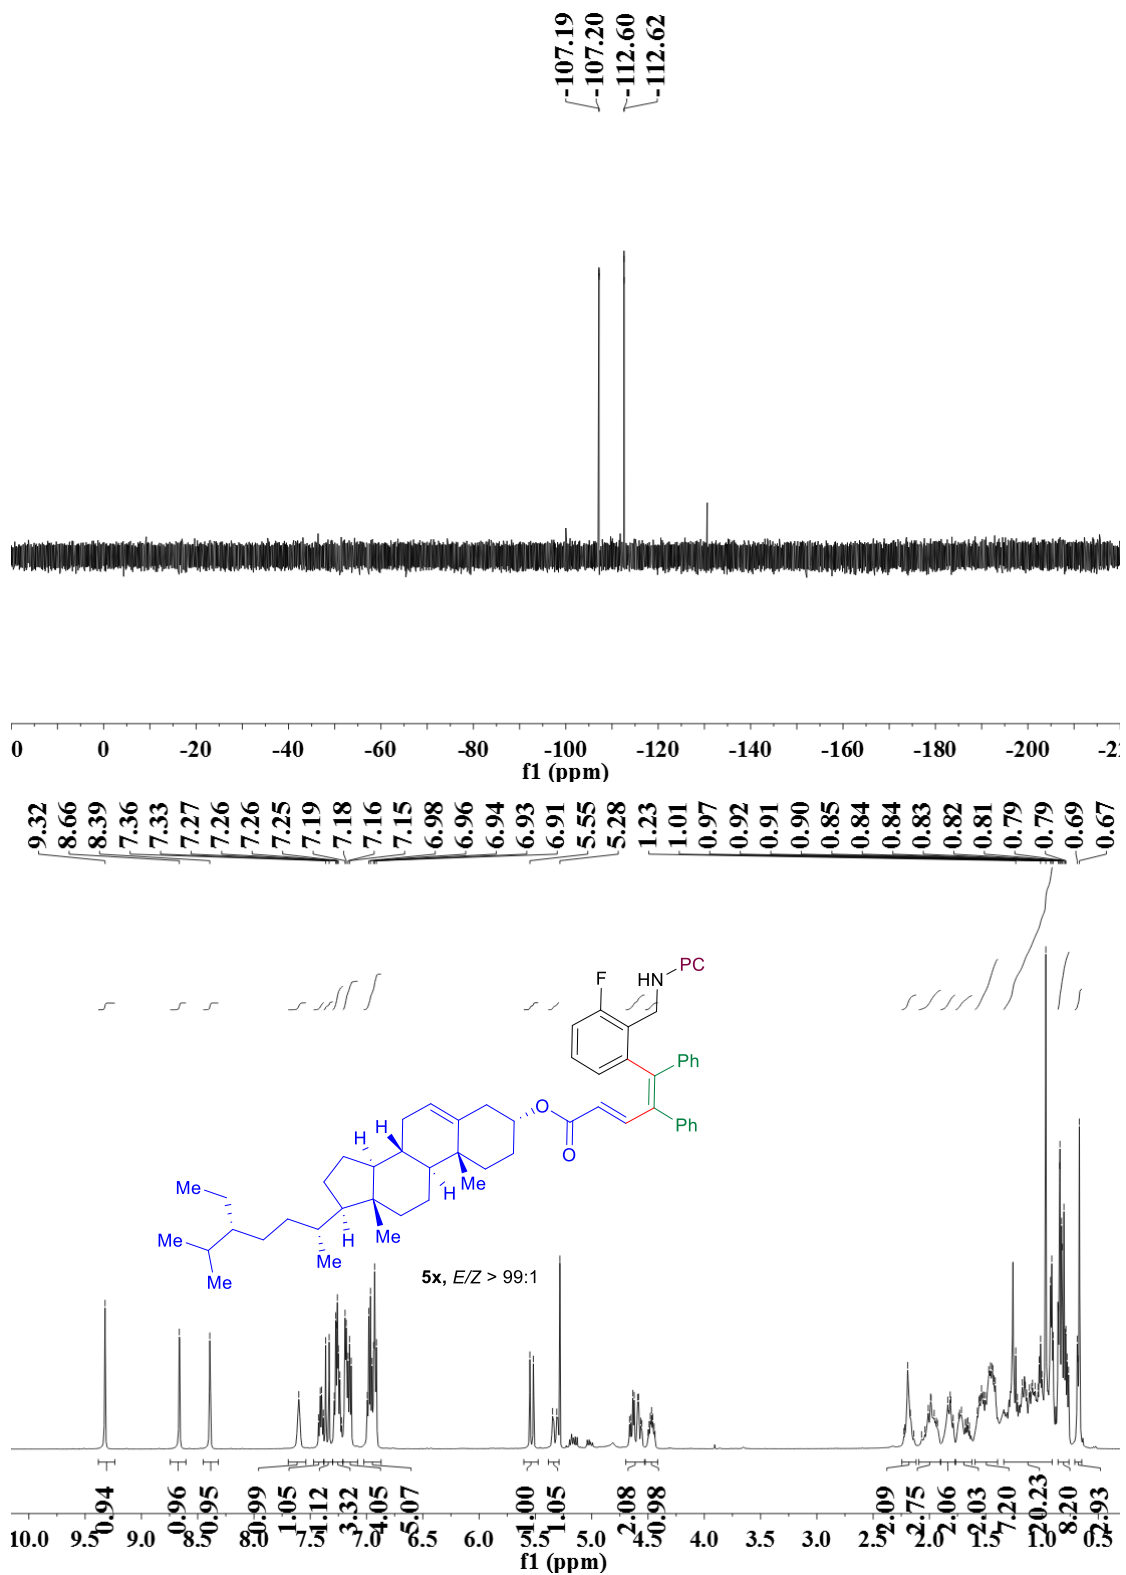

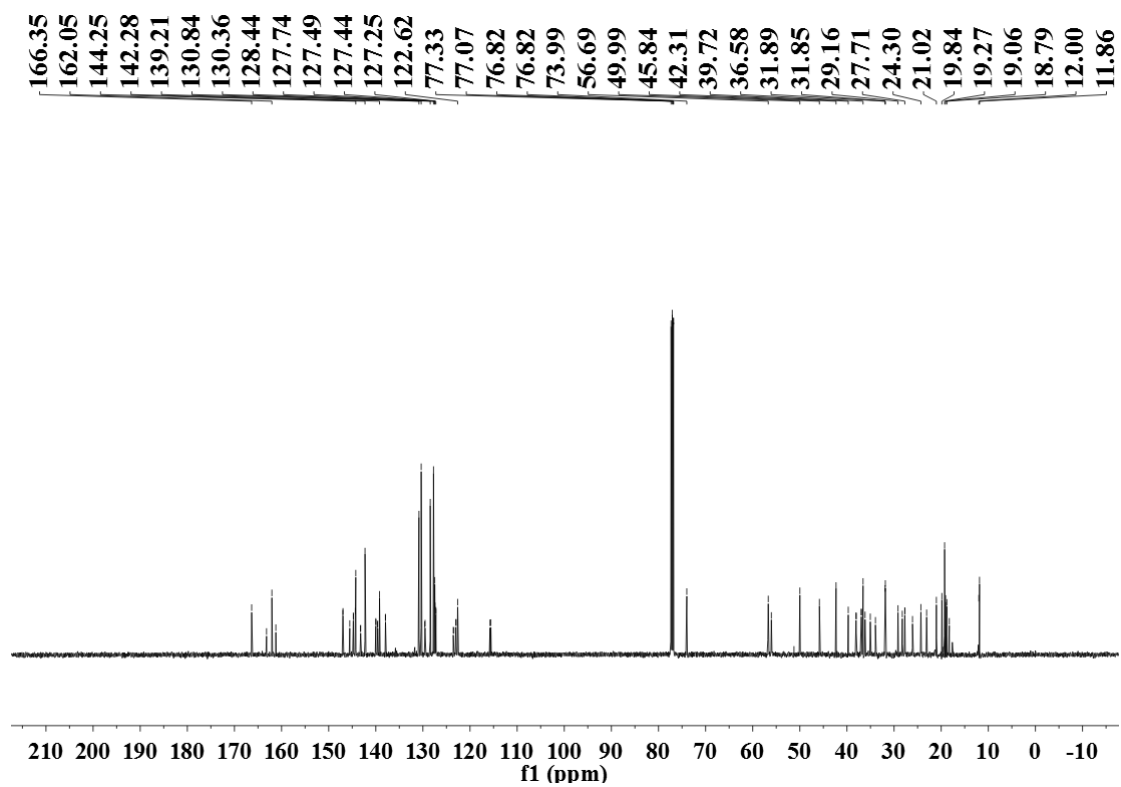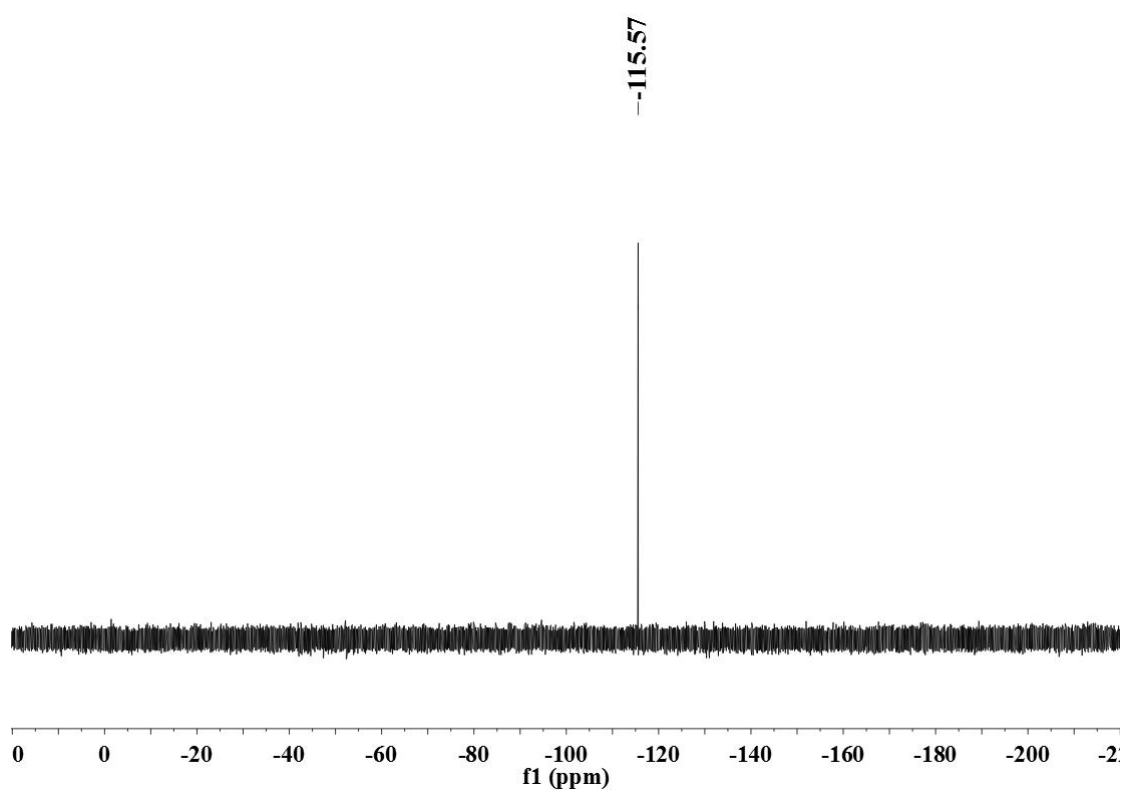

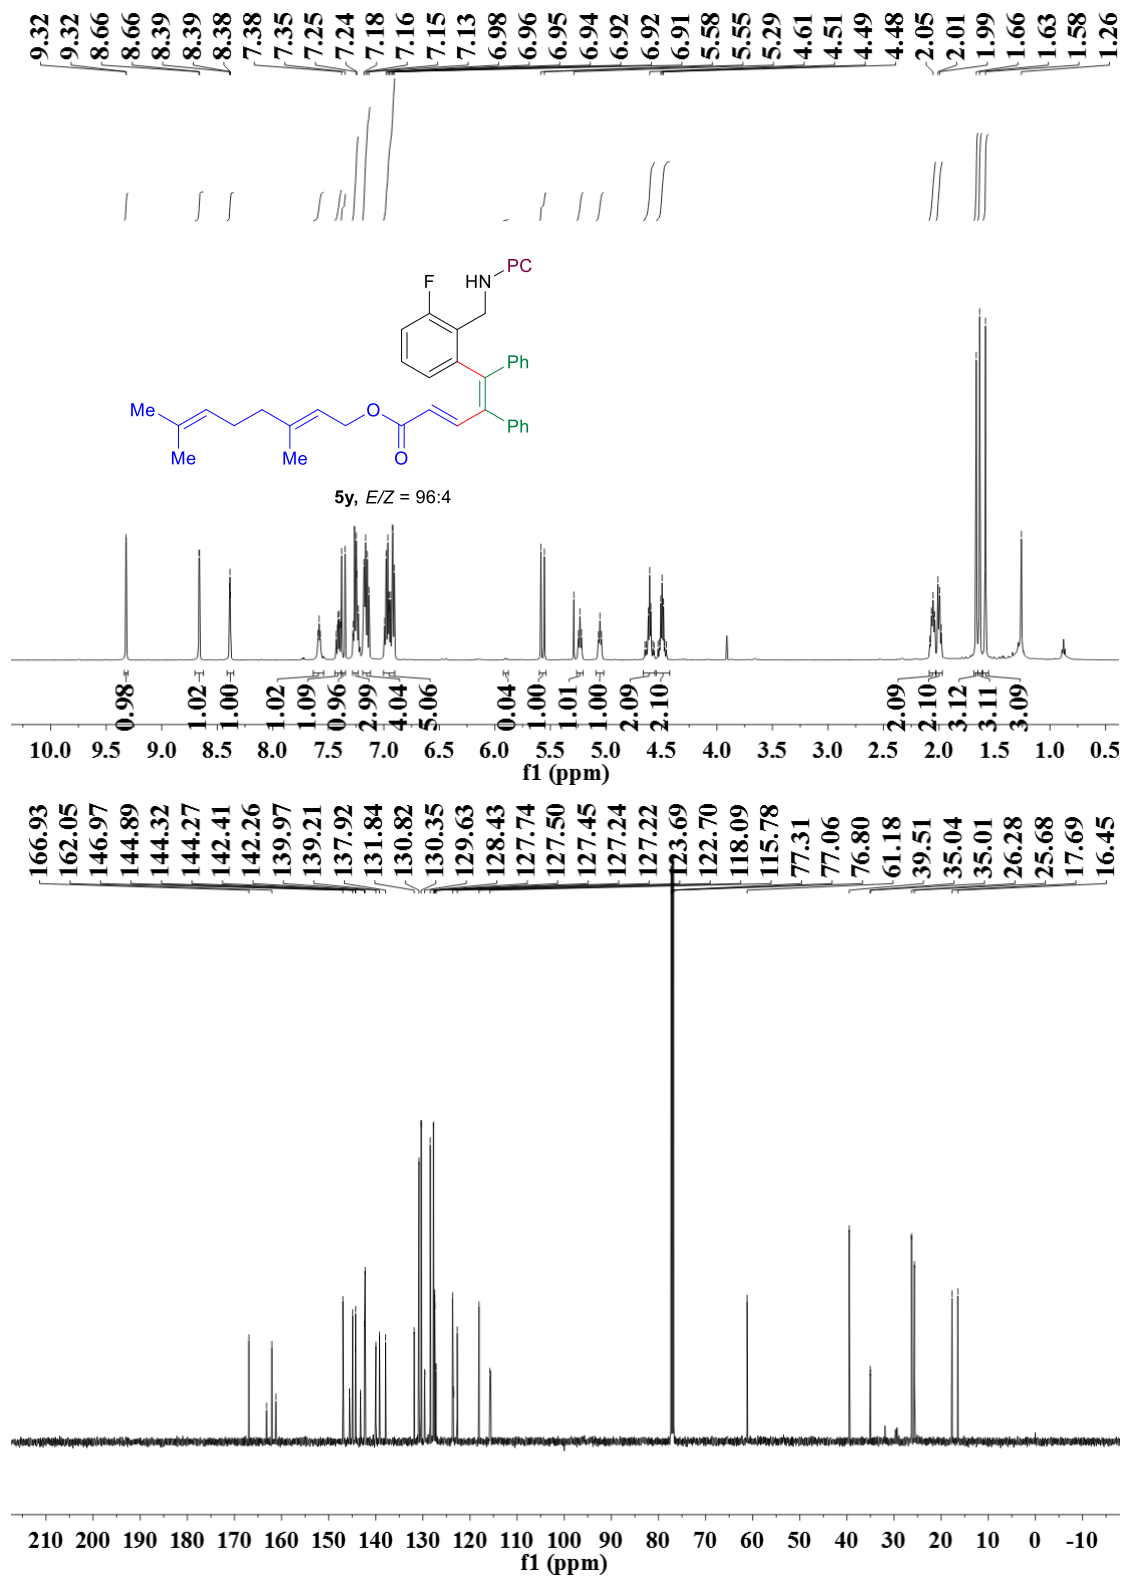

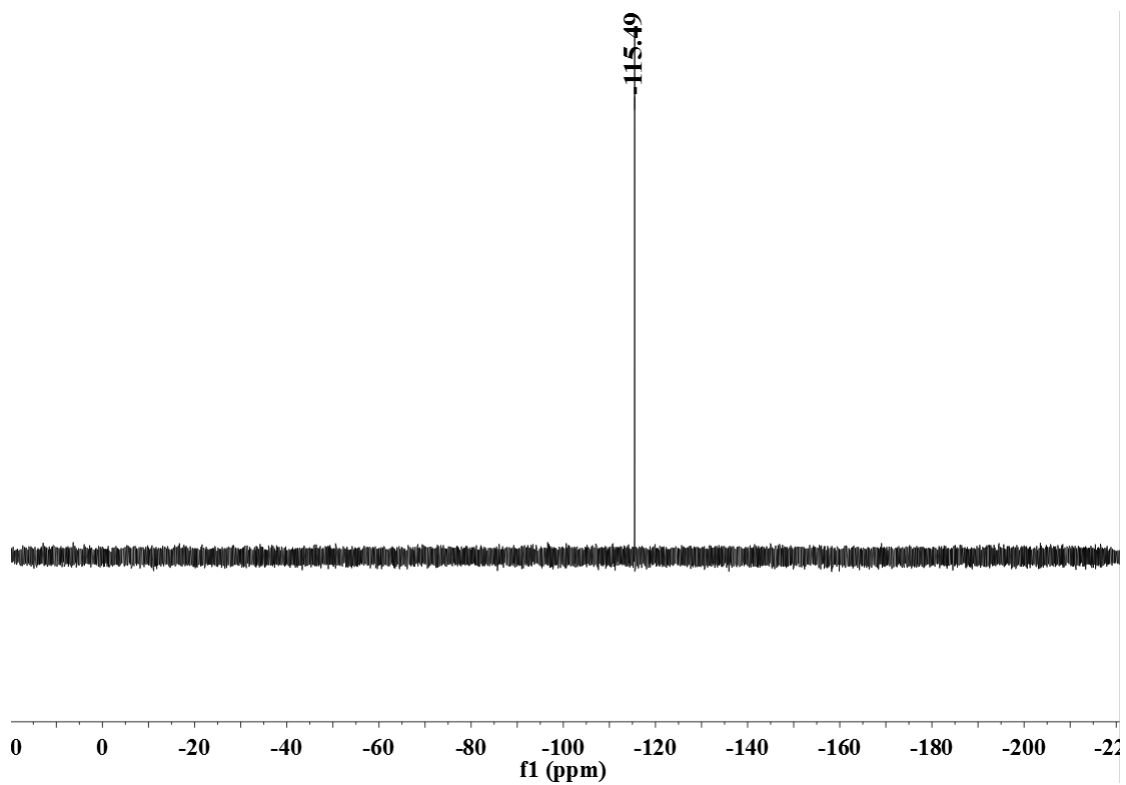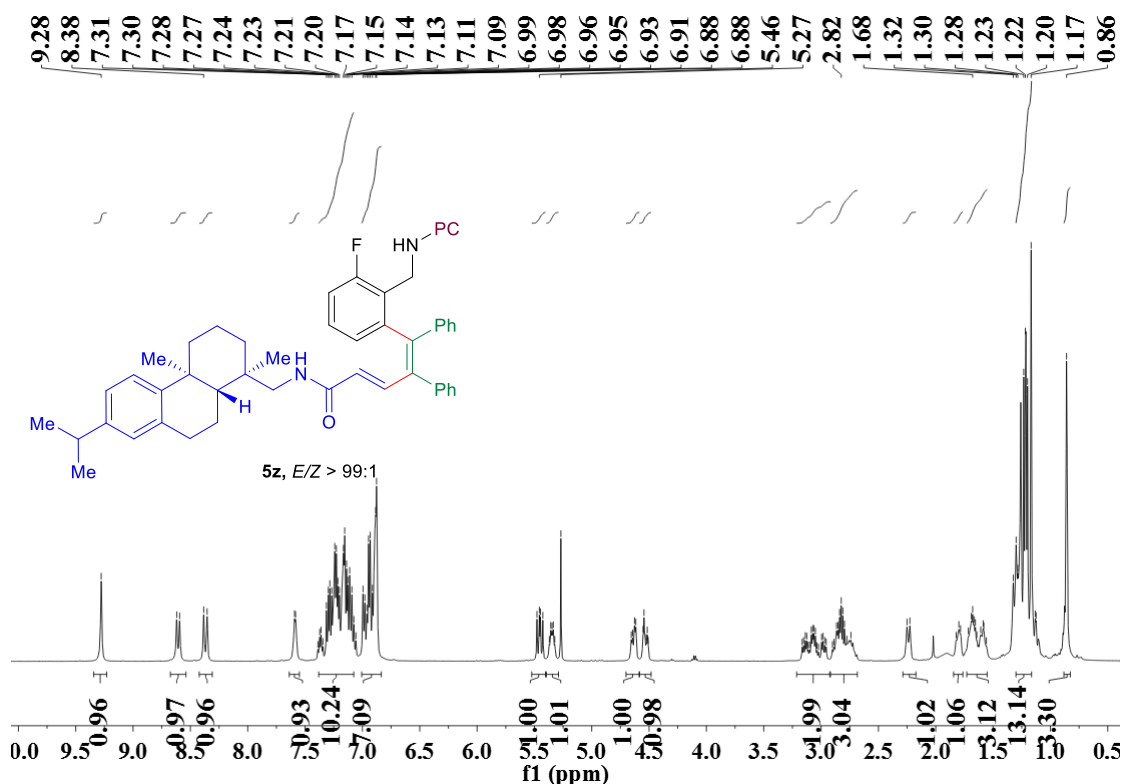

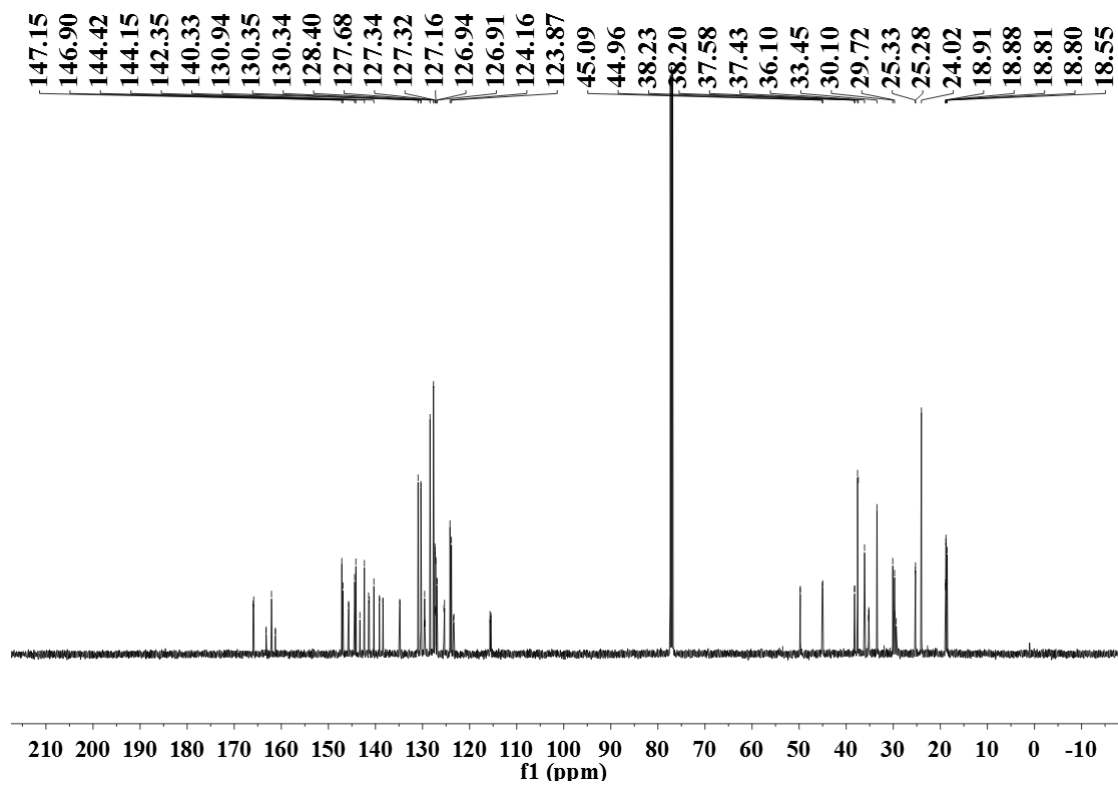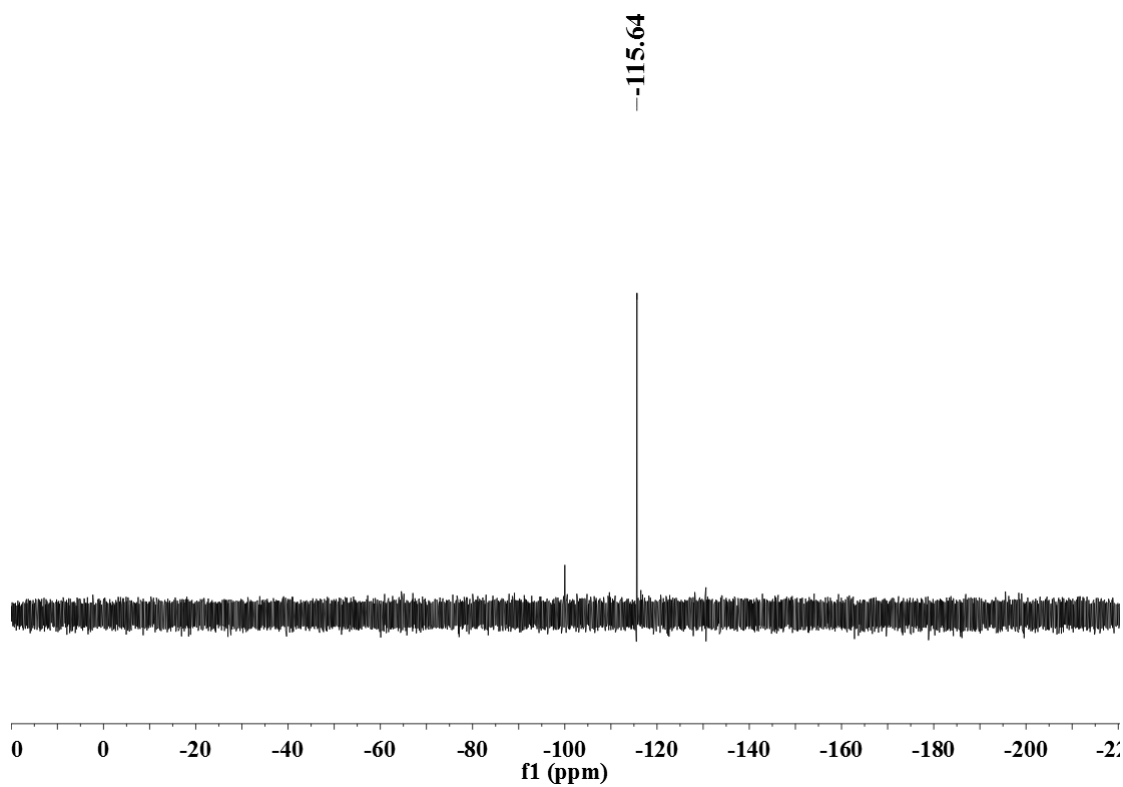

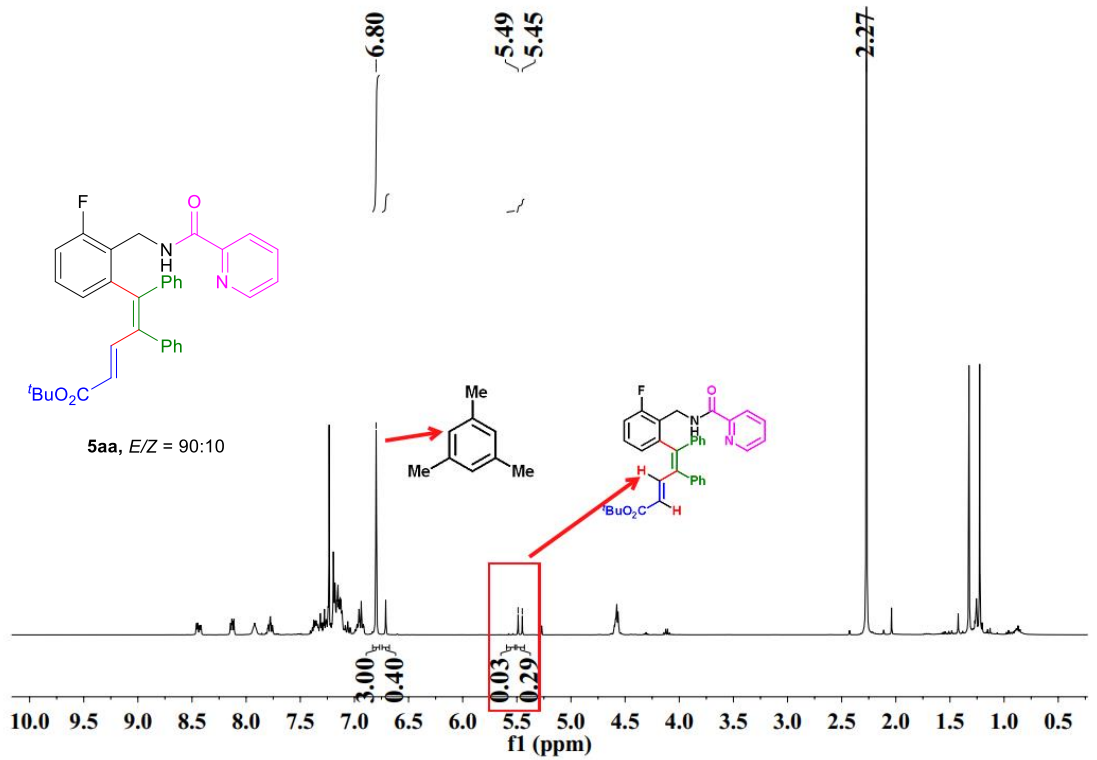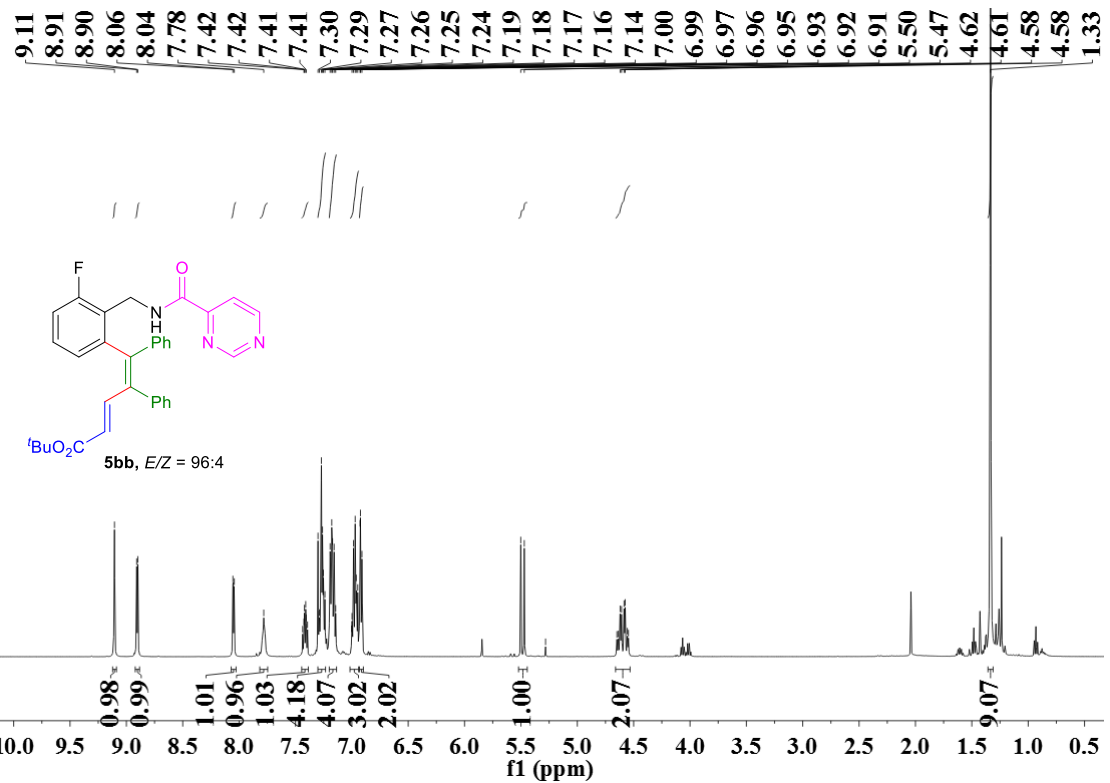

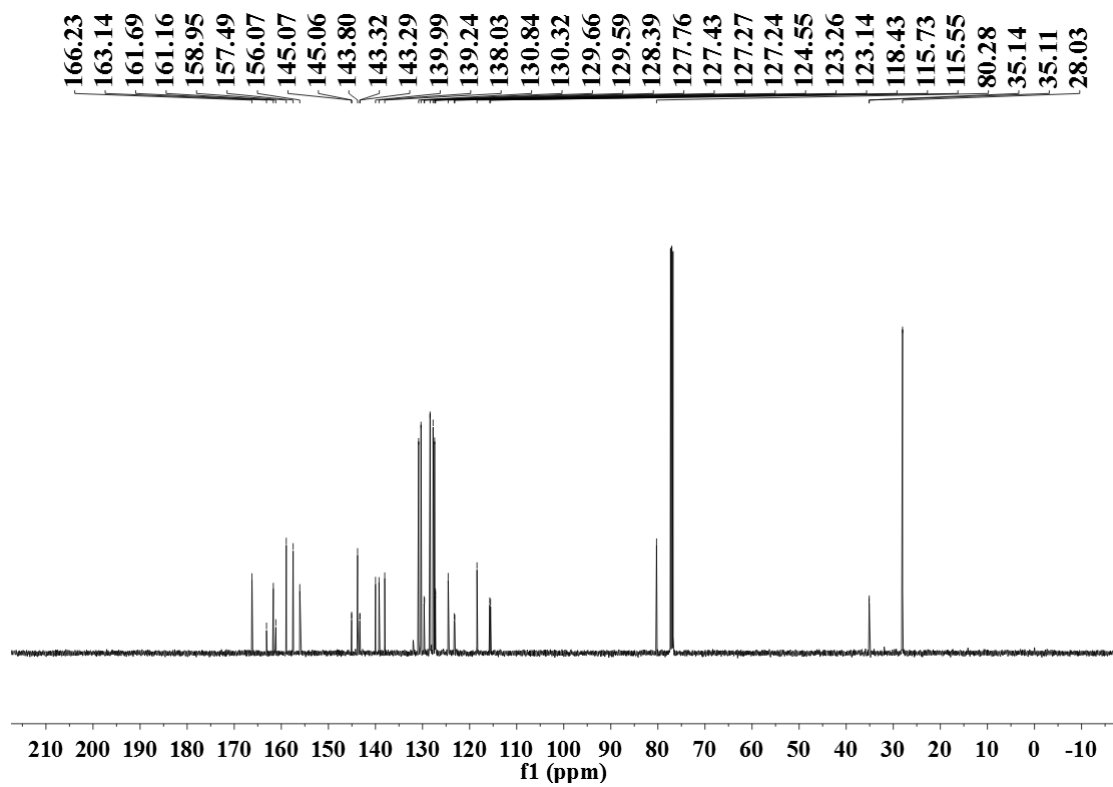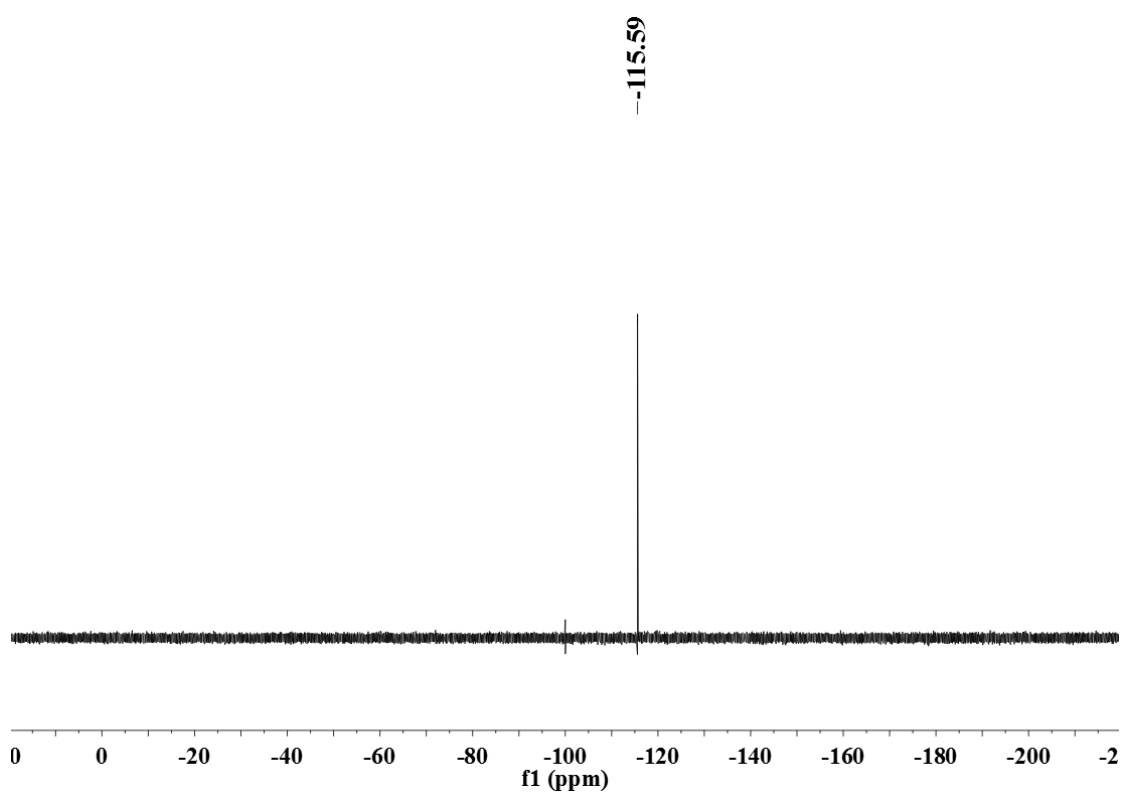



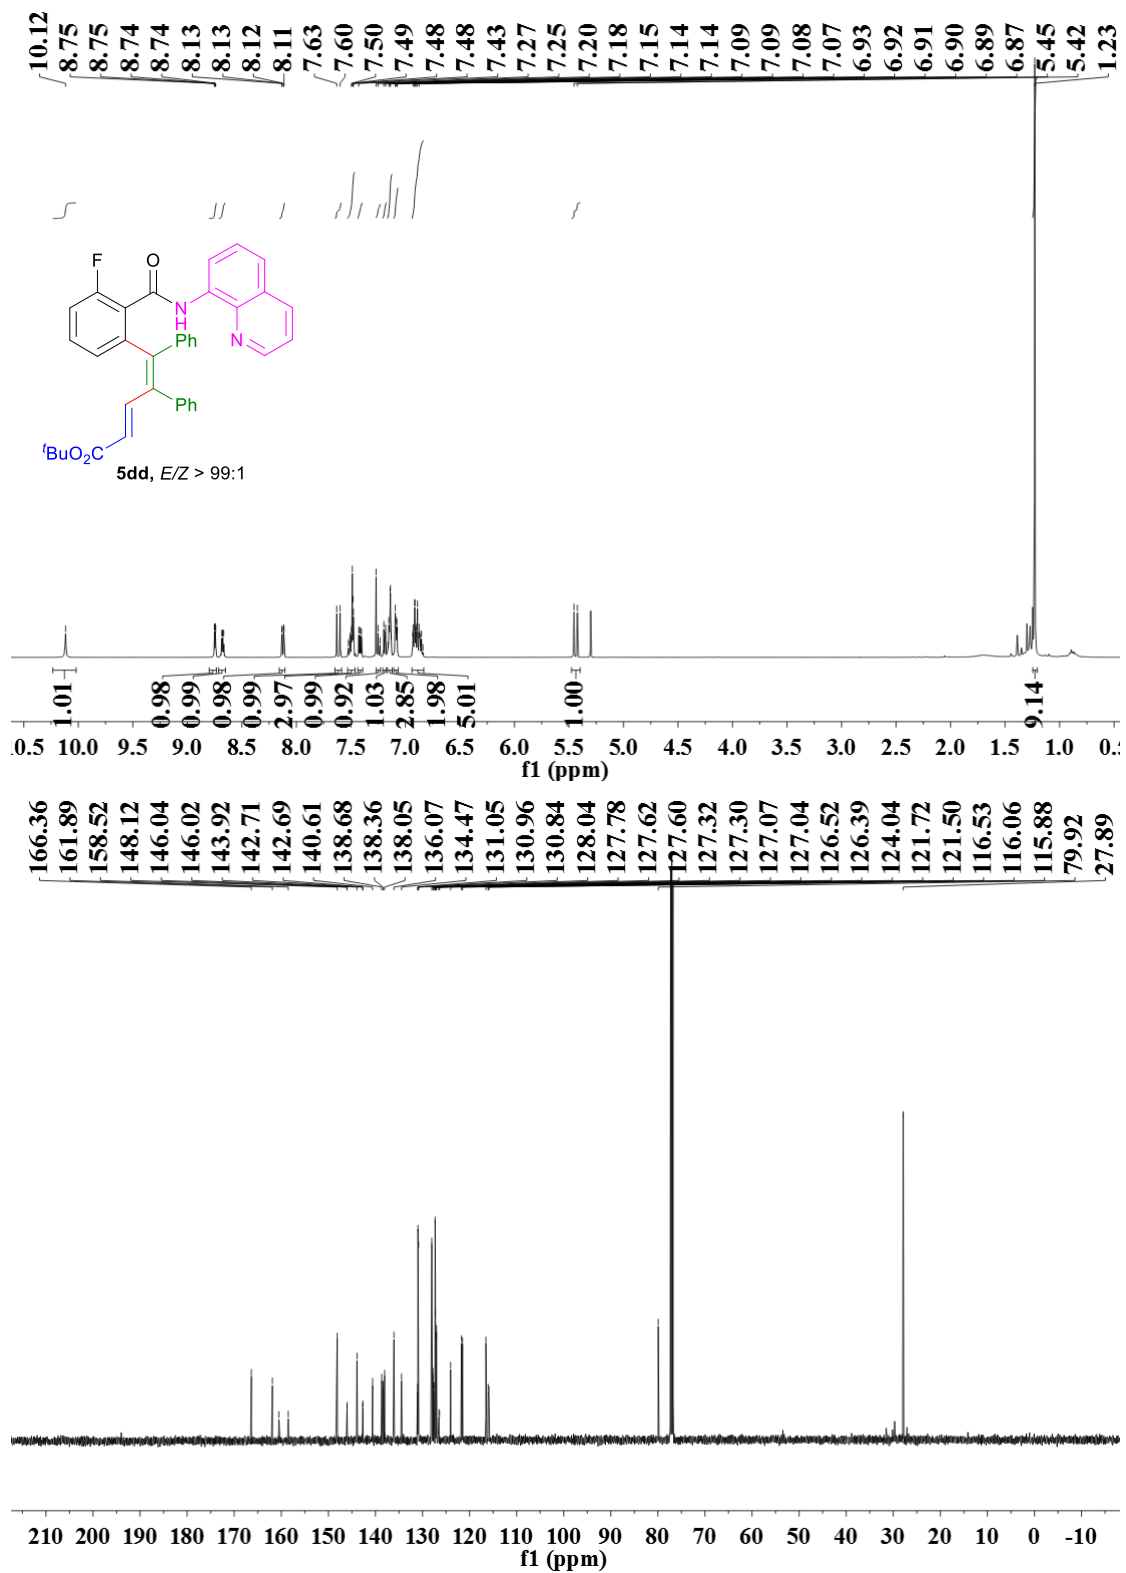

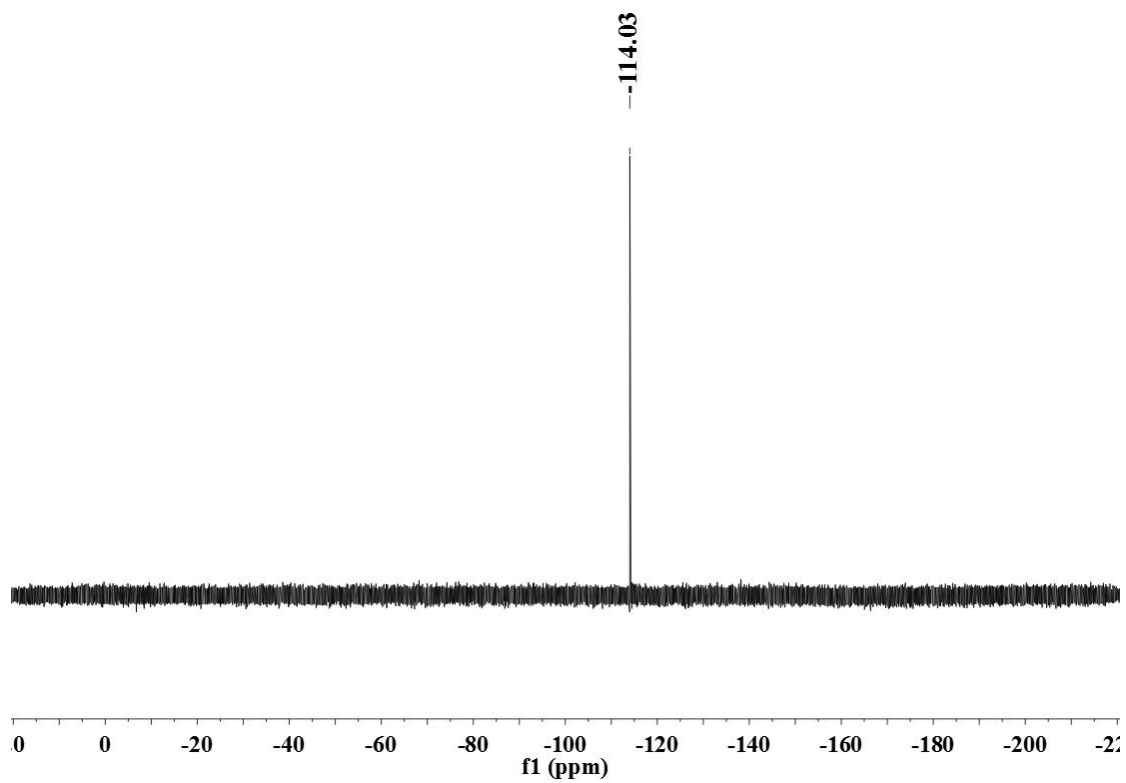

## 9.4 NMR Spectra of 7

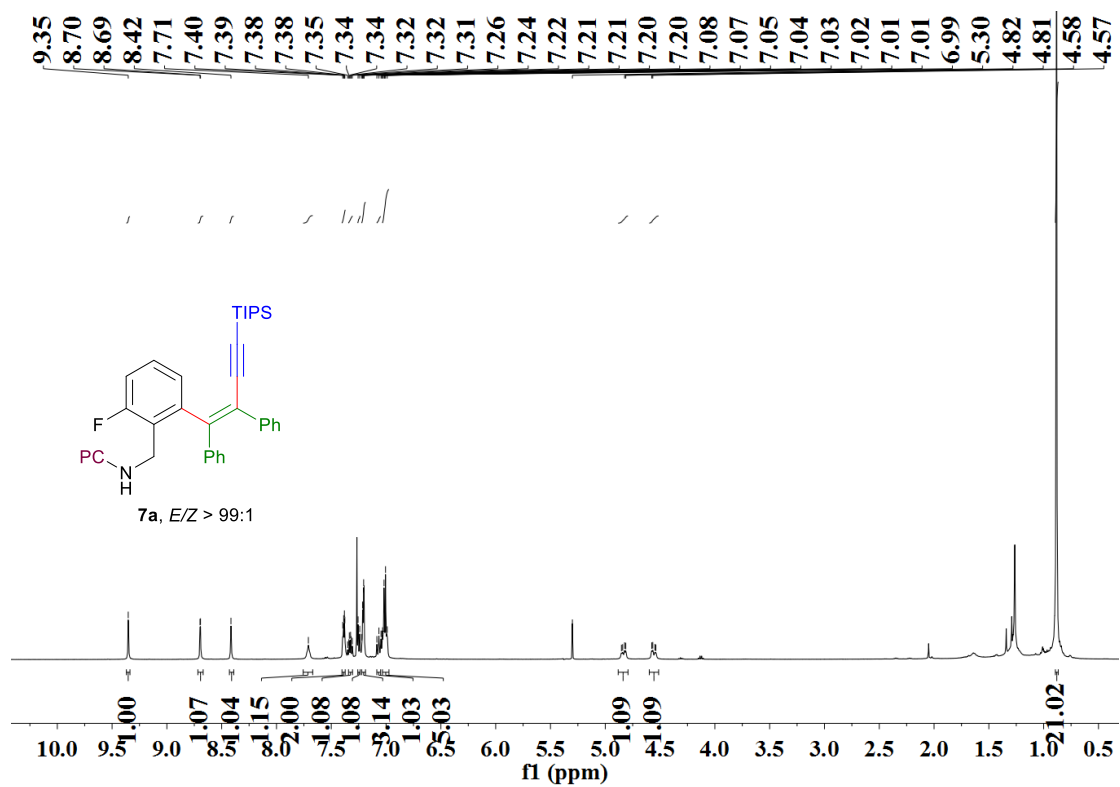

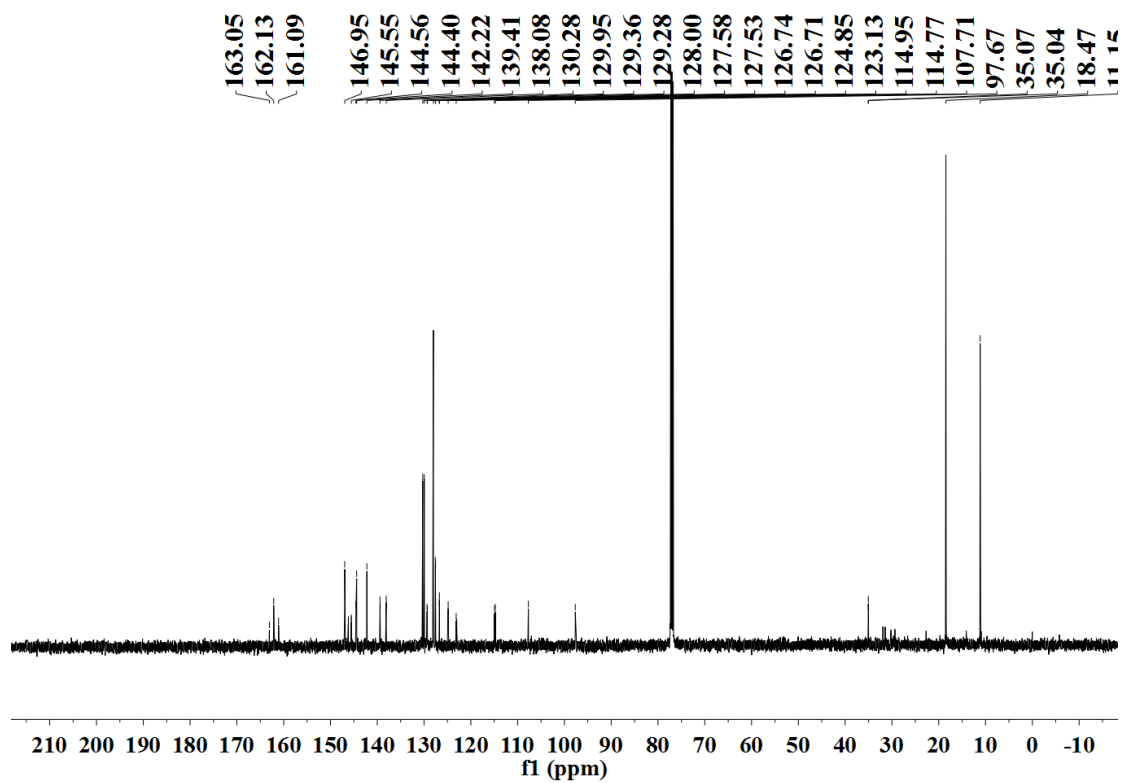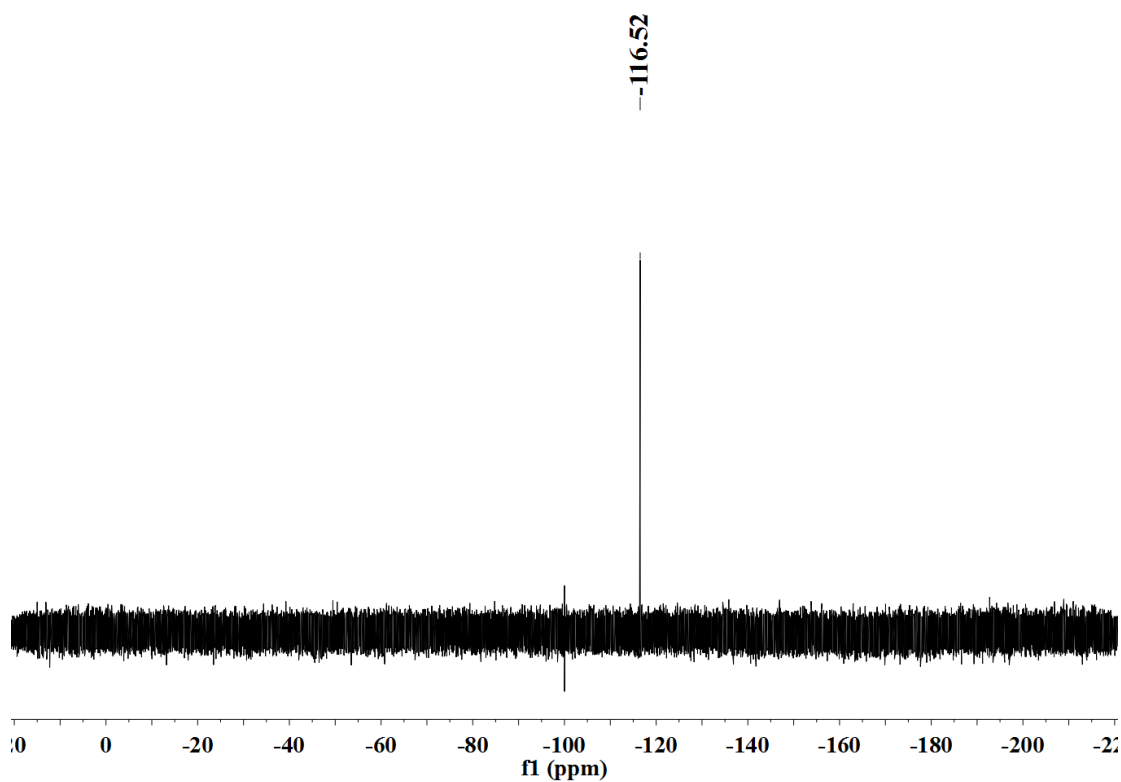

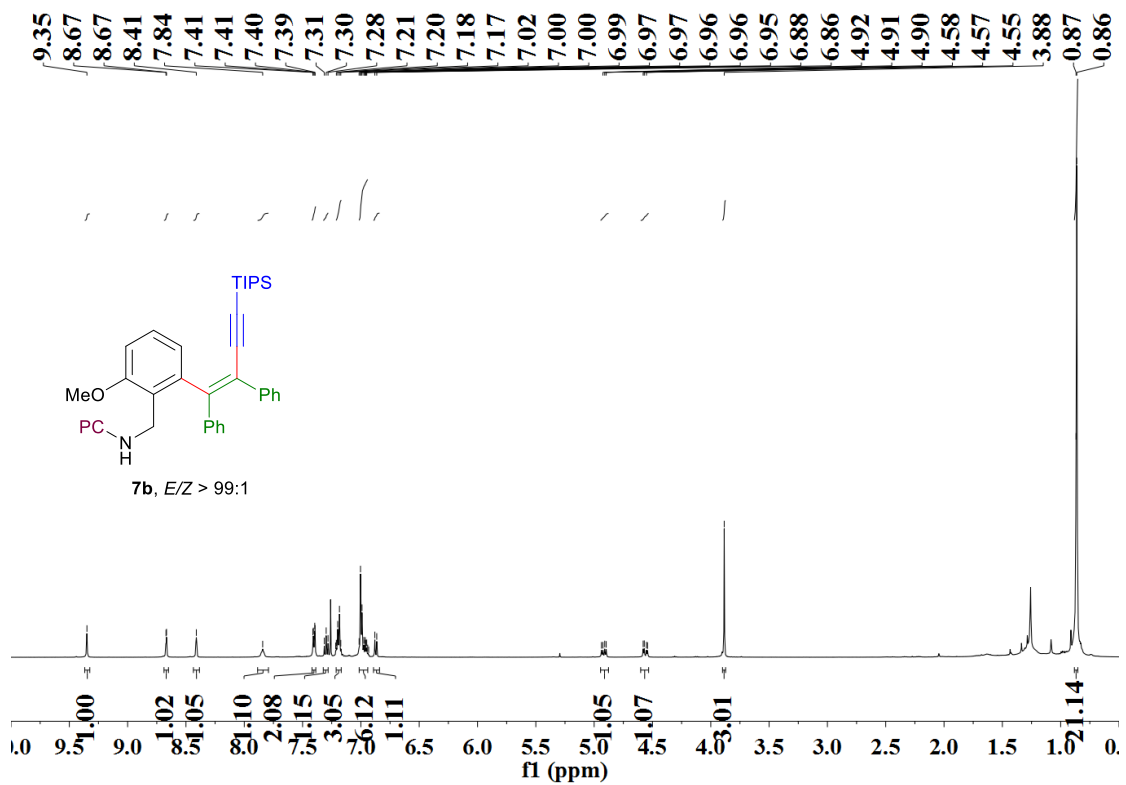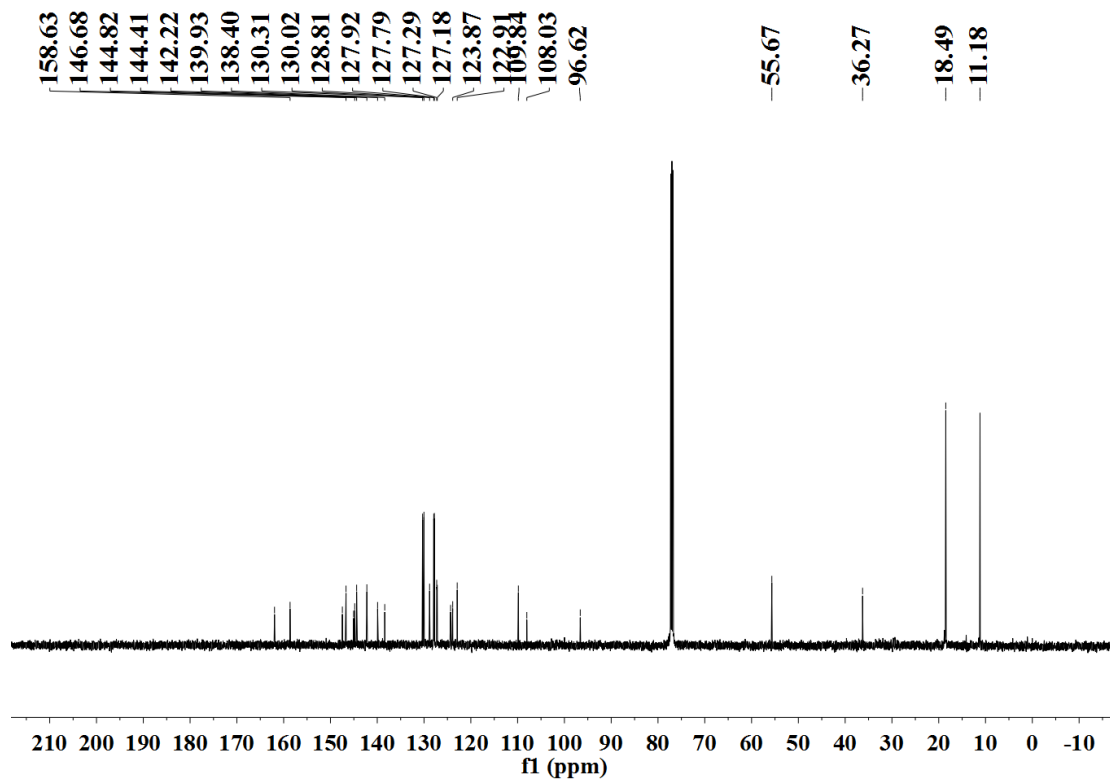

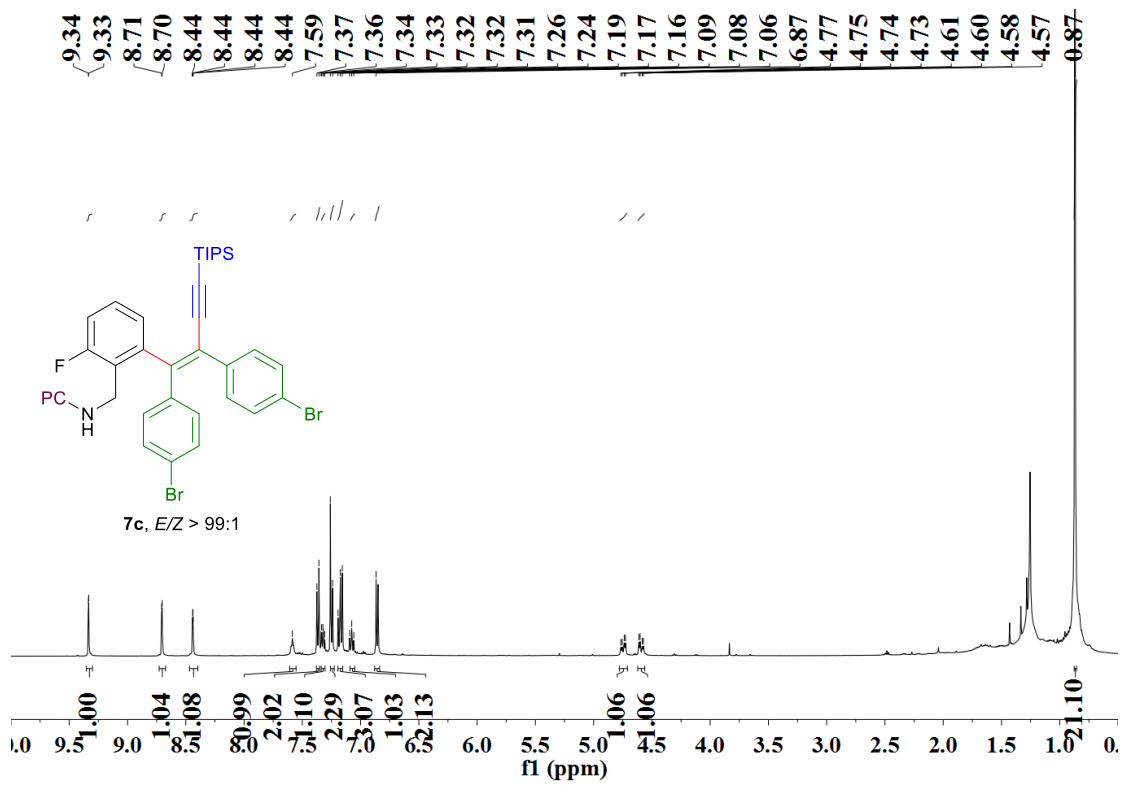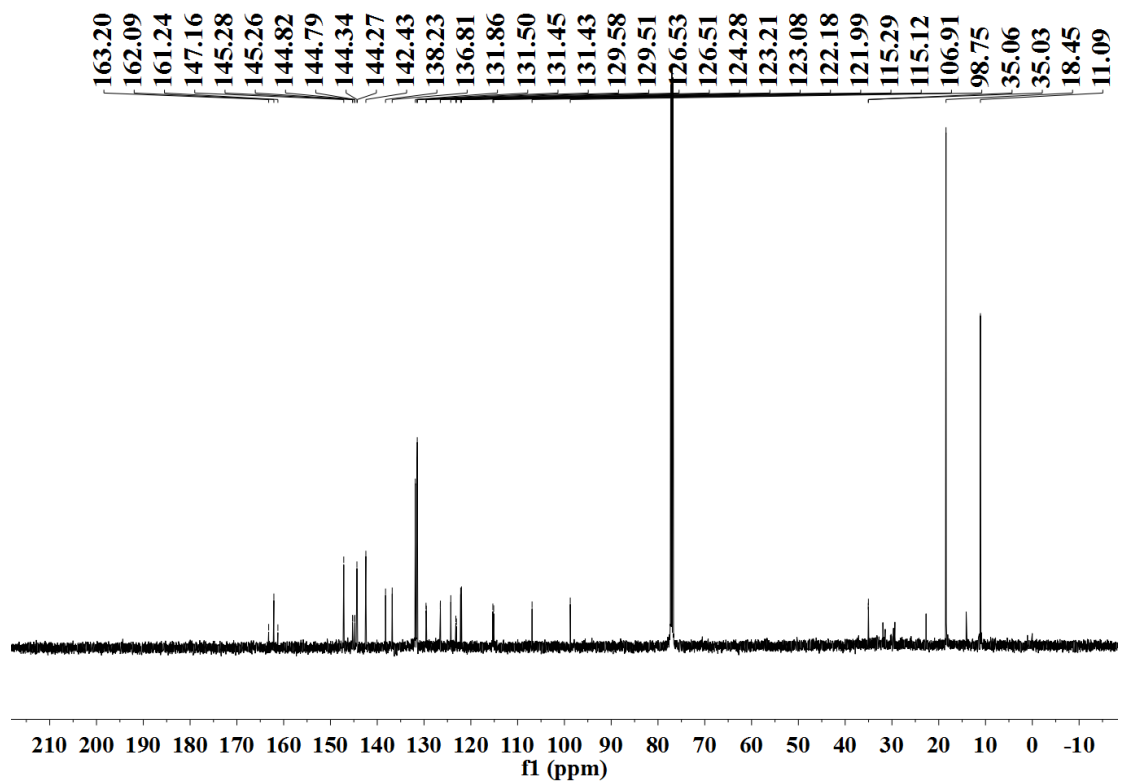

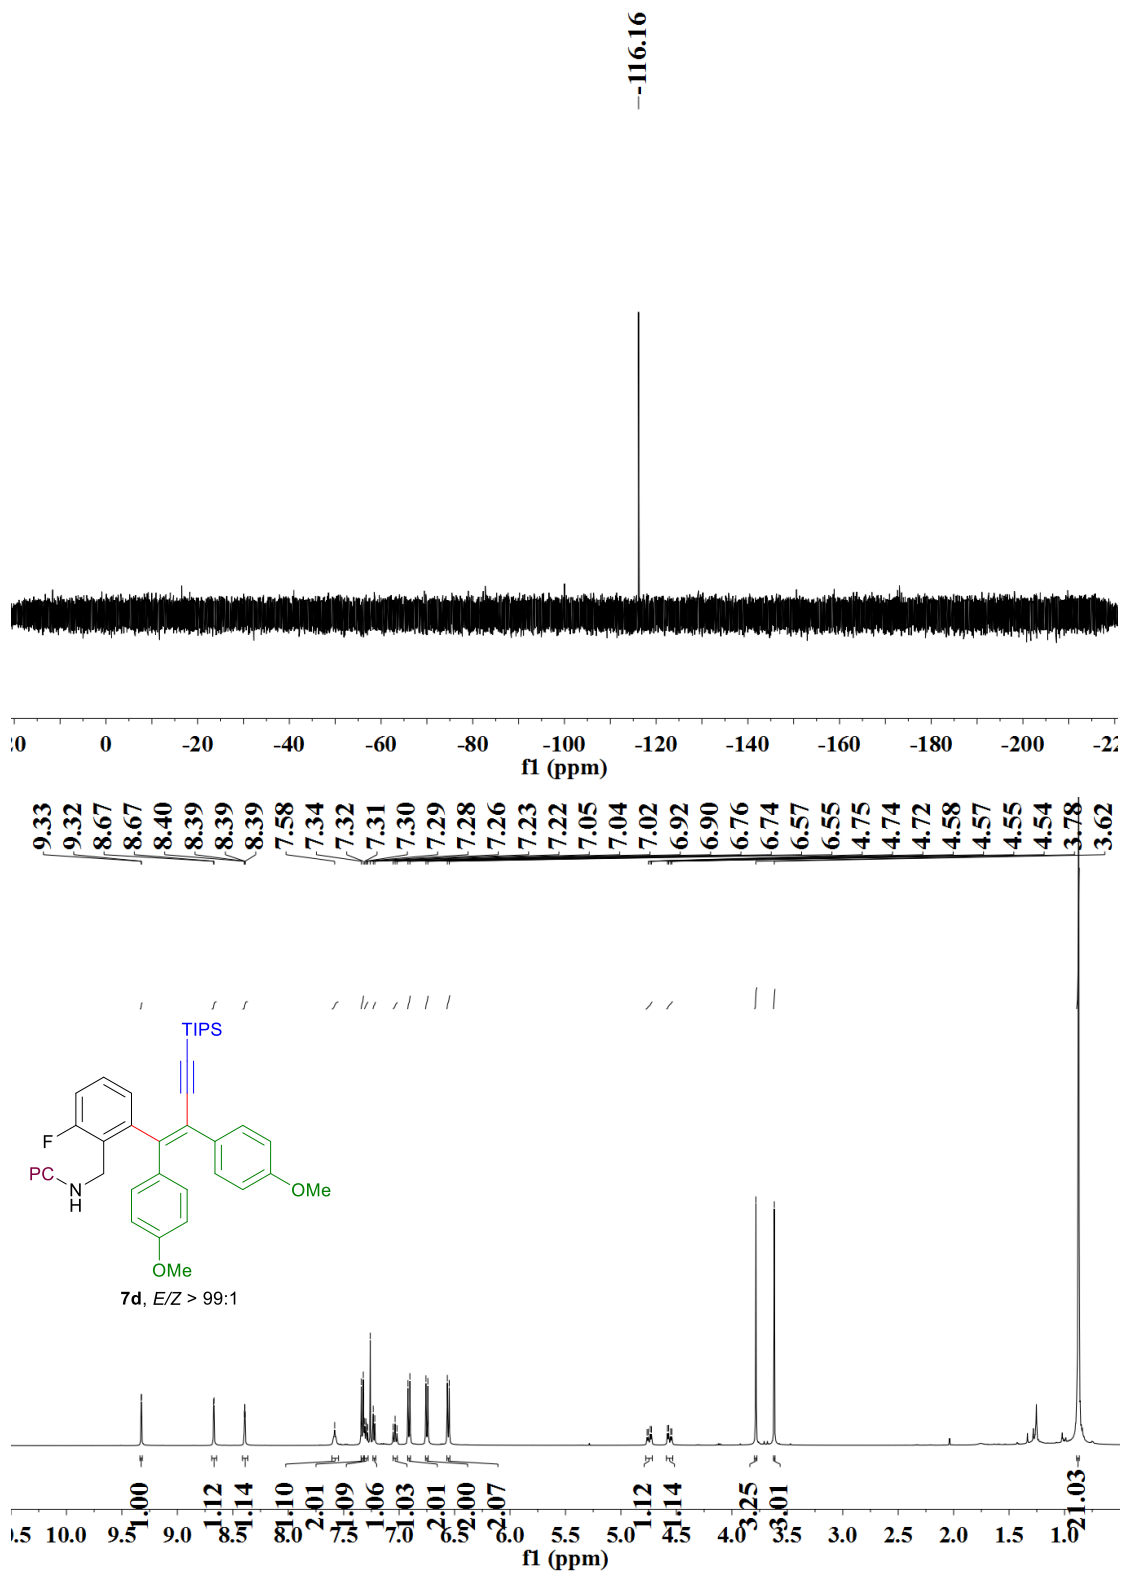

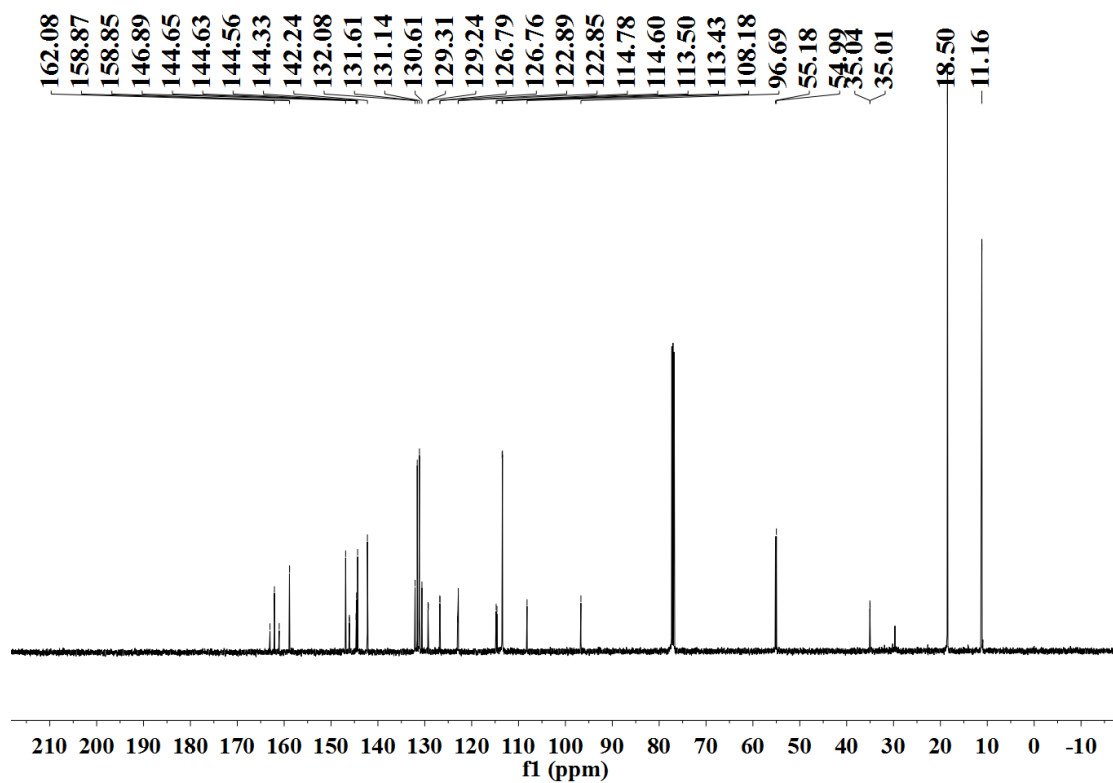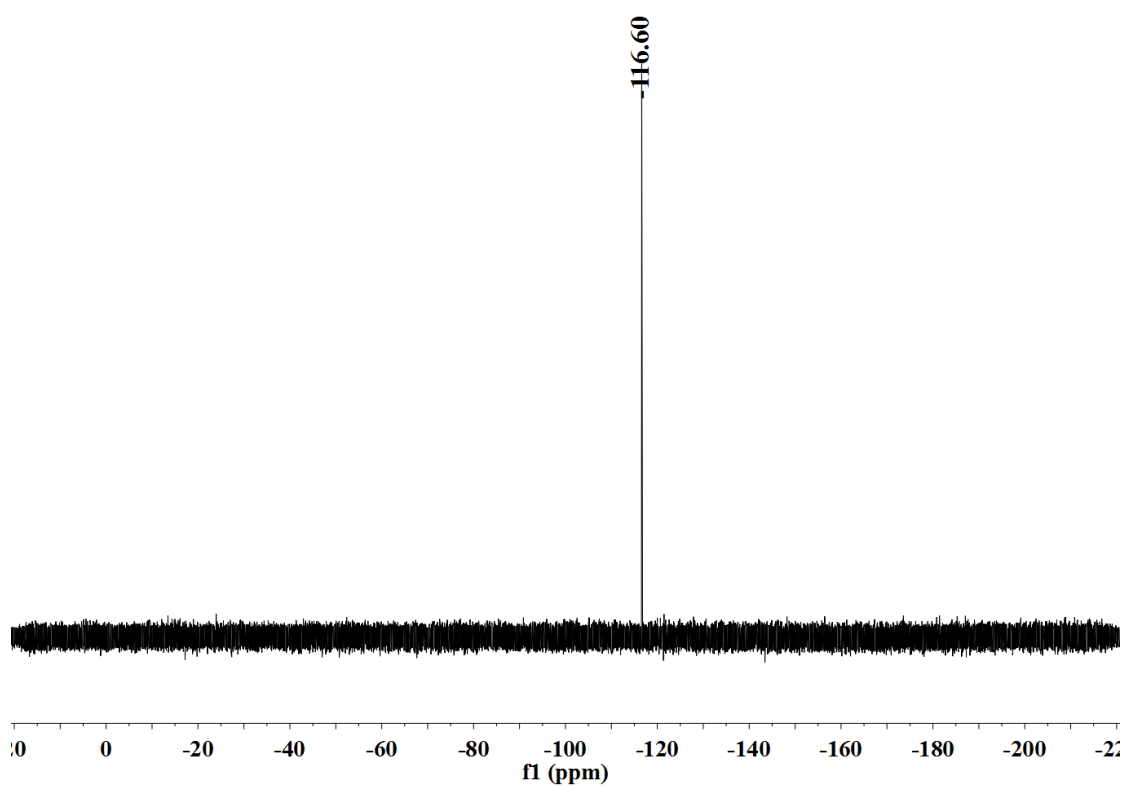

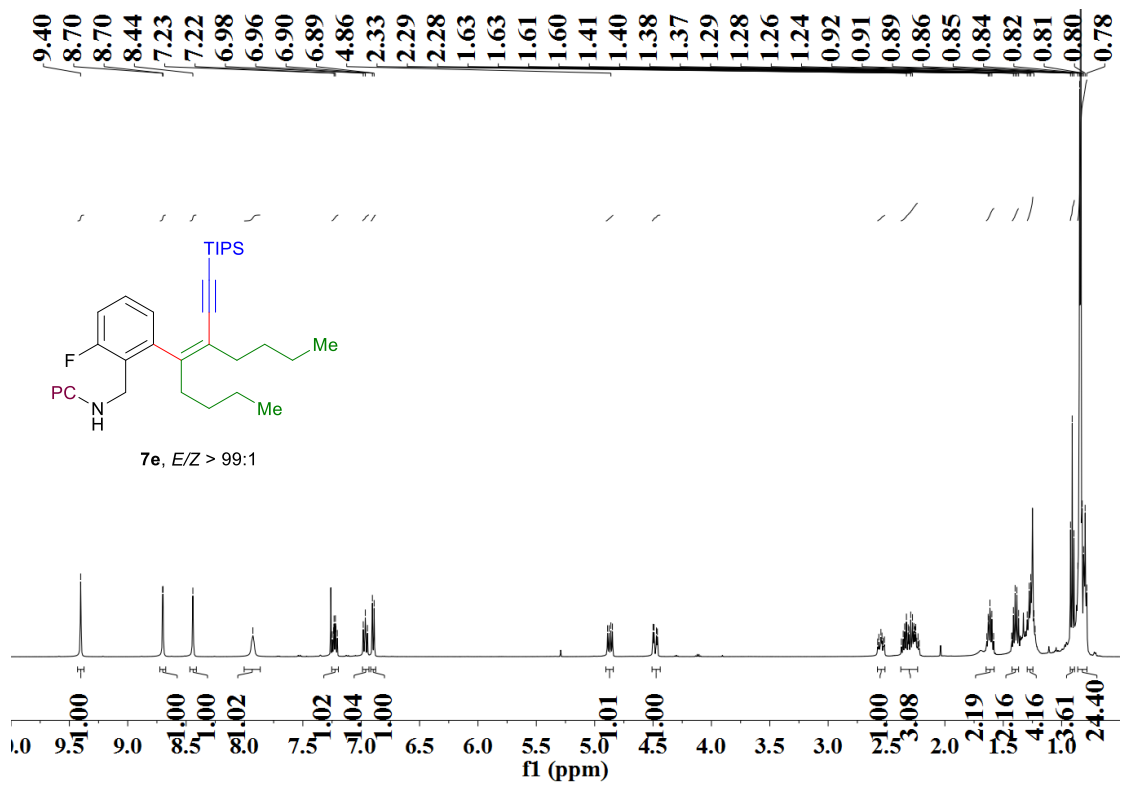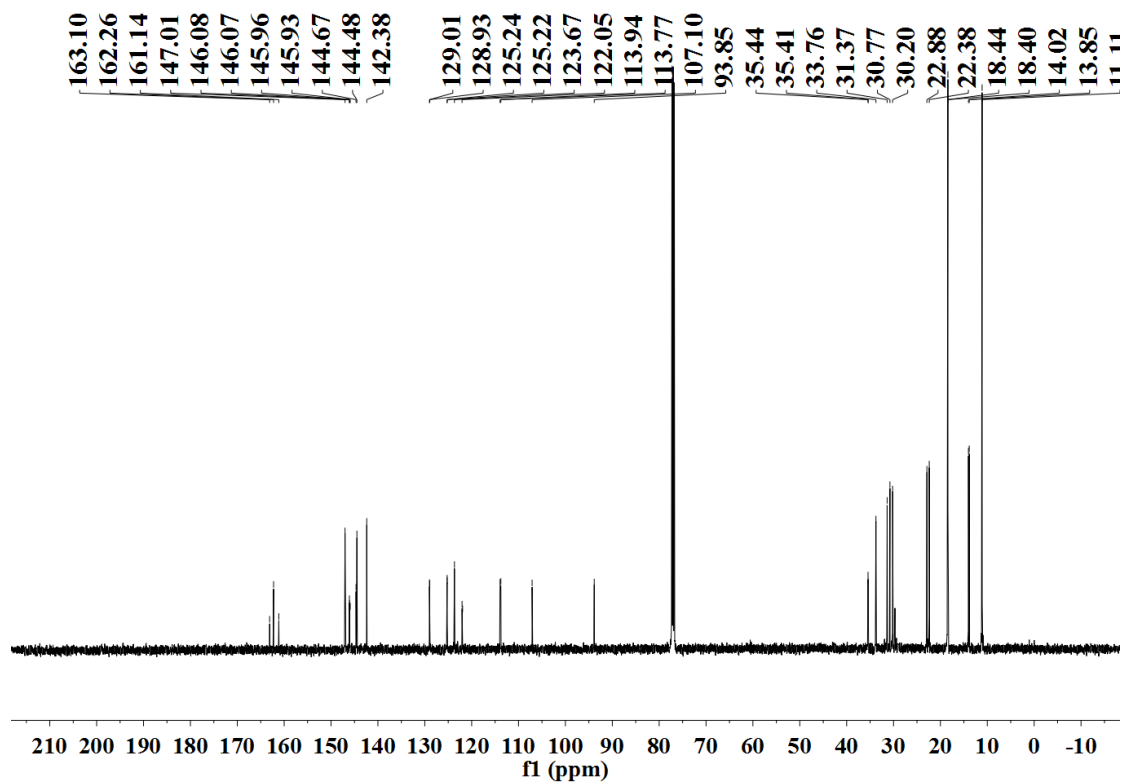



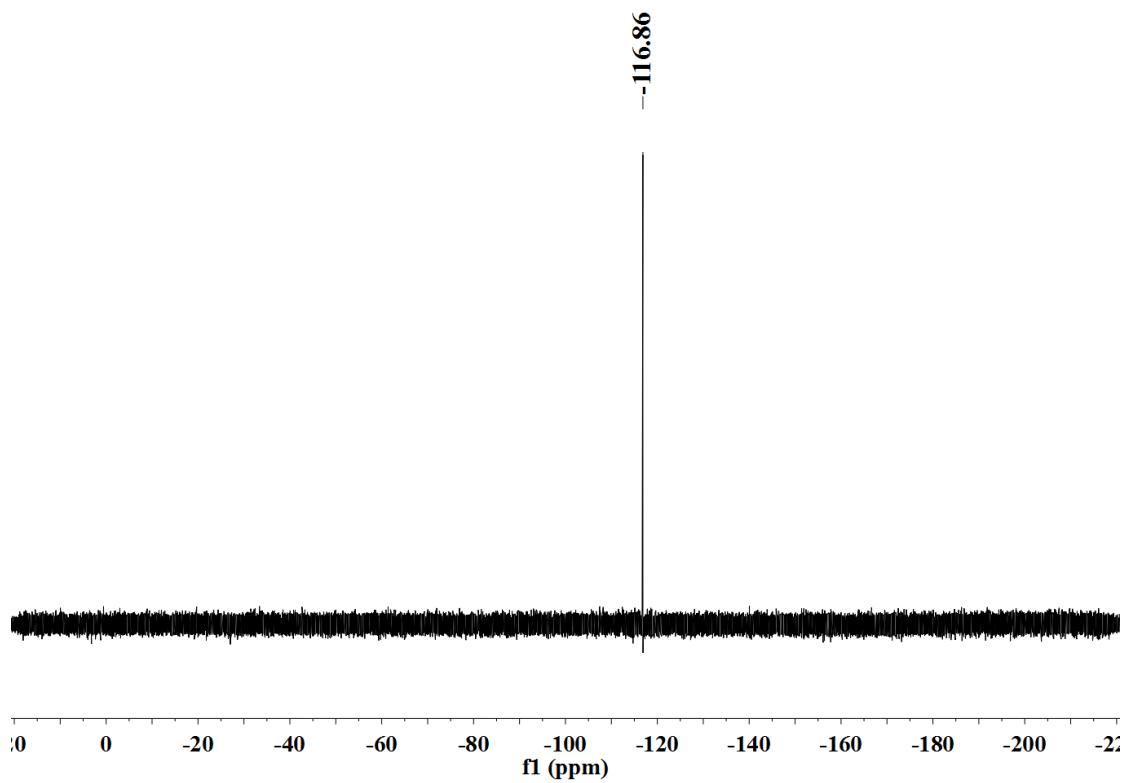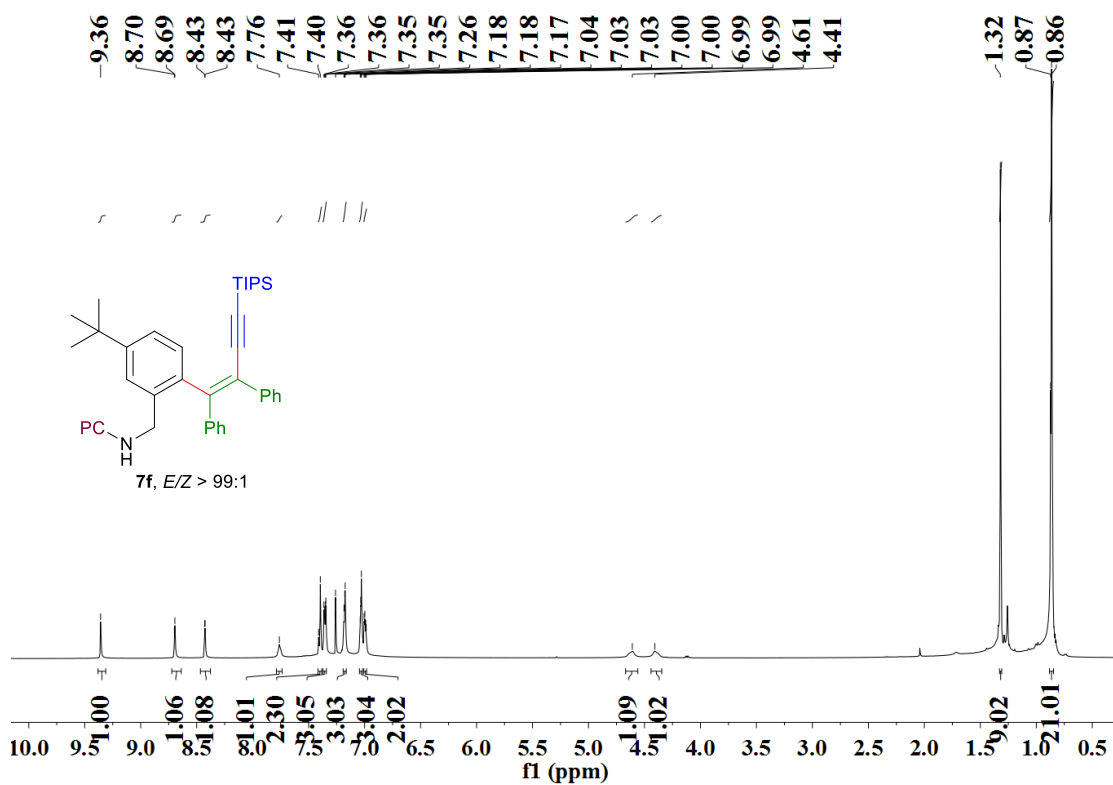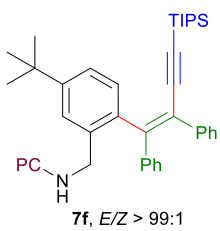

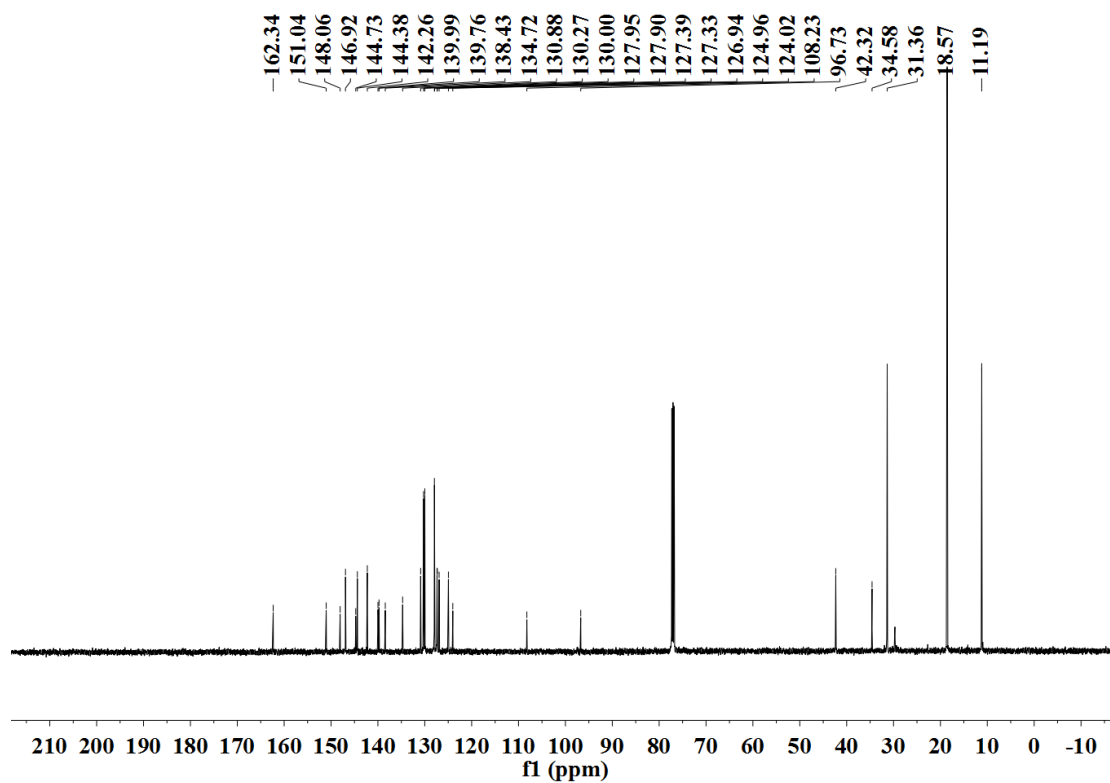

## 9.5 NMR Spectra of 9

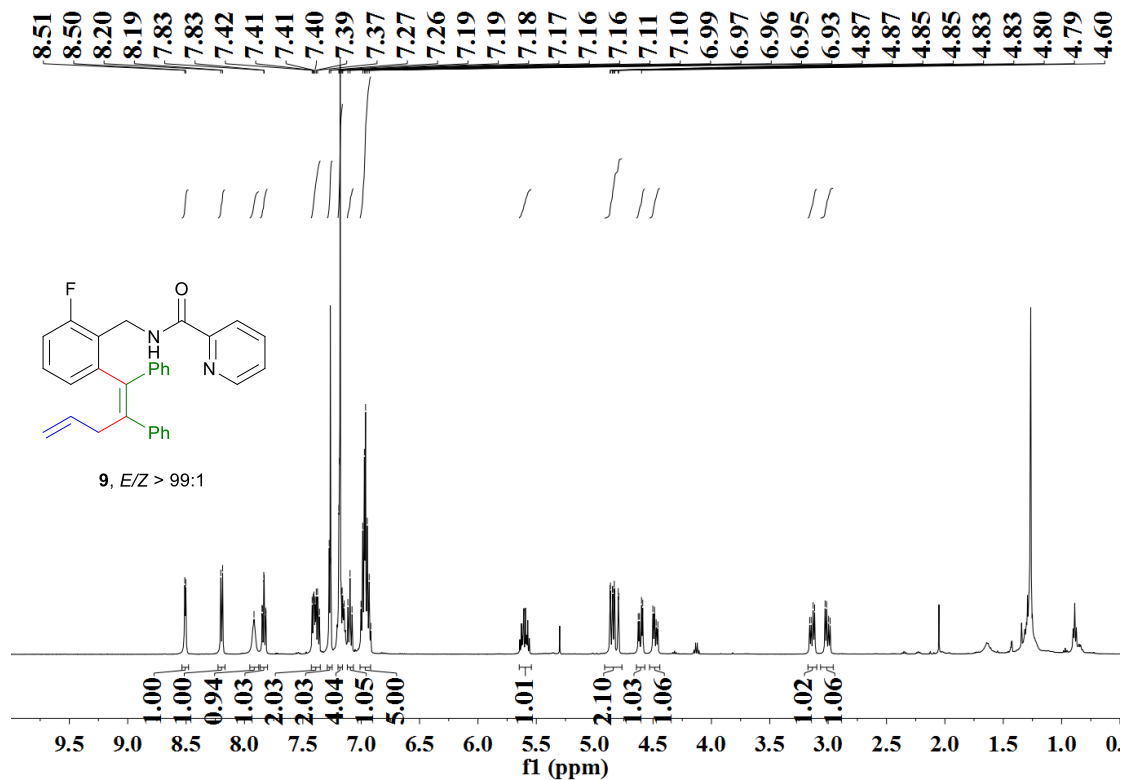

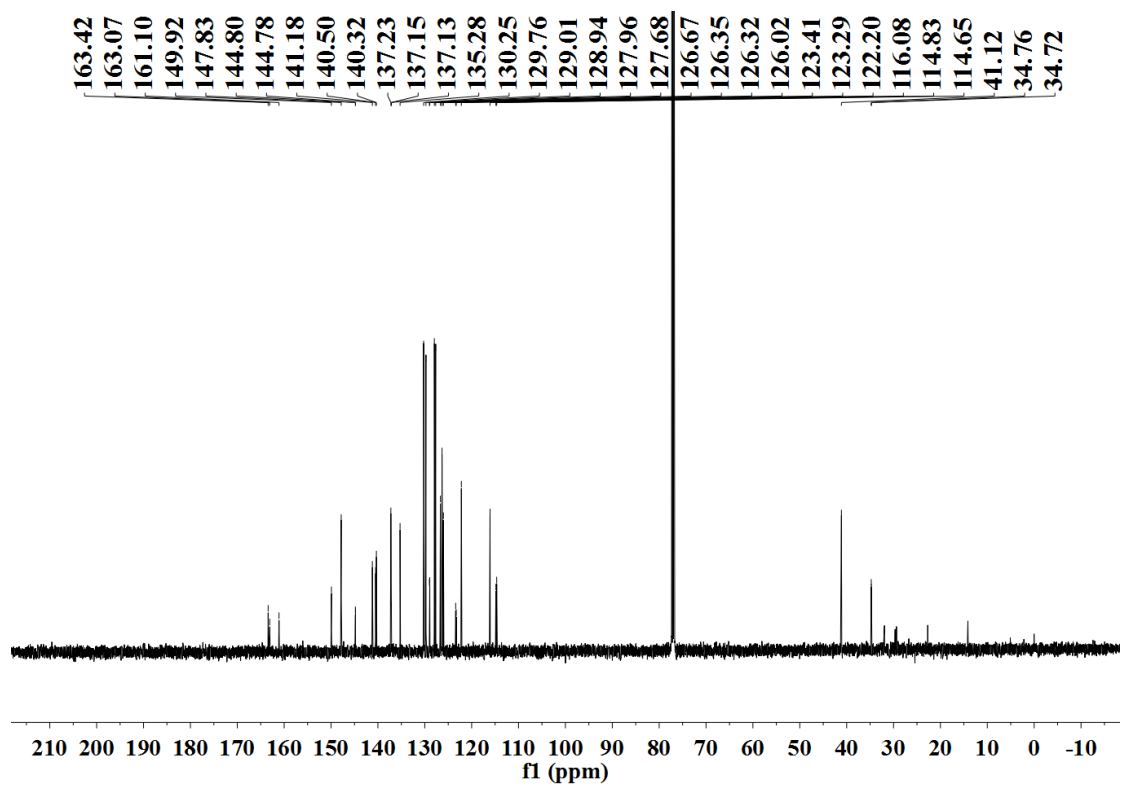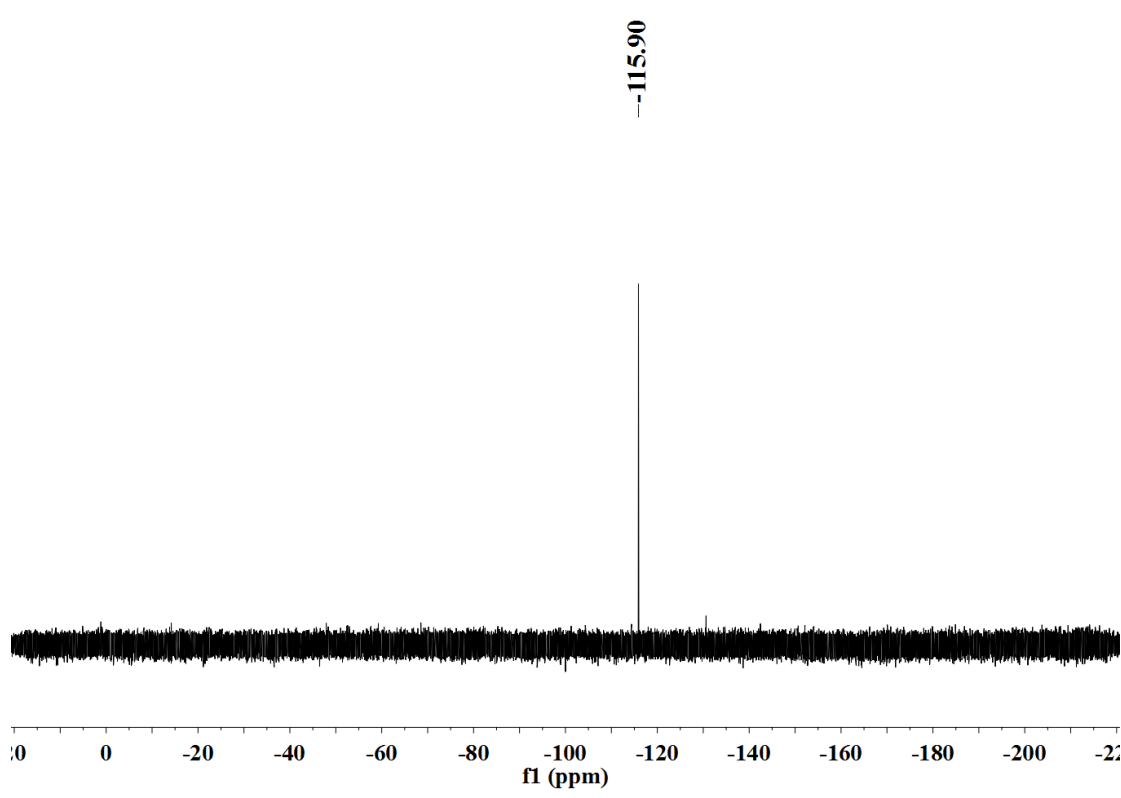

## 9.6 NMR Spectra of Synthetic Applications

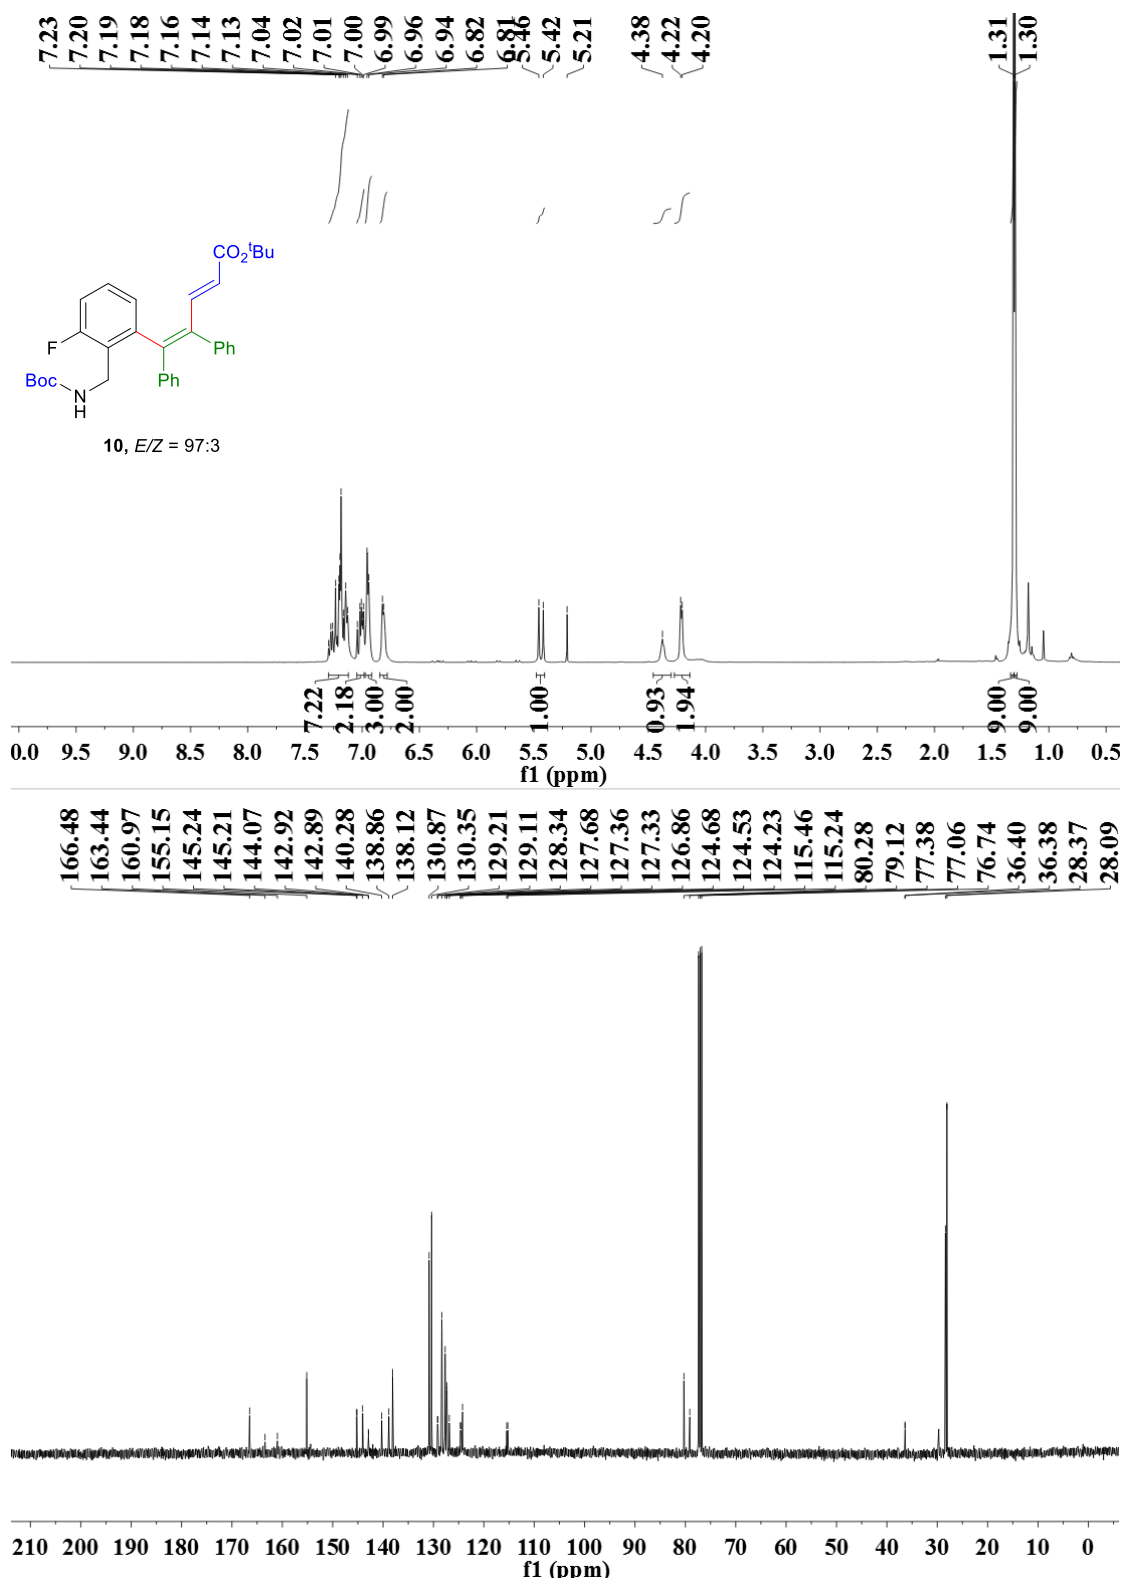

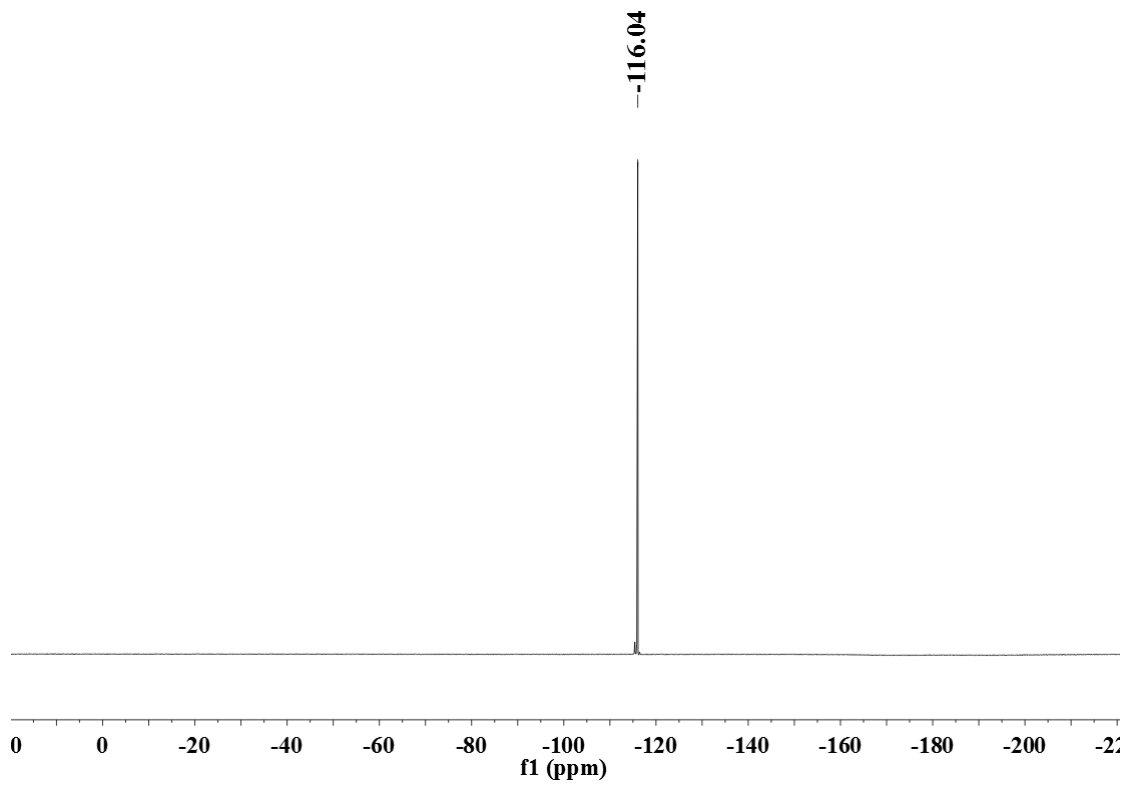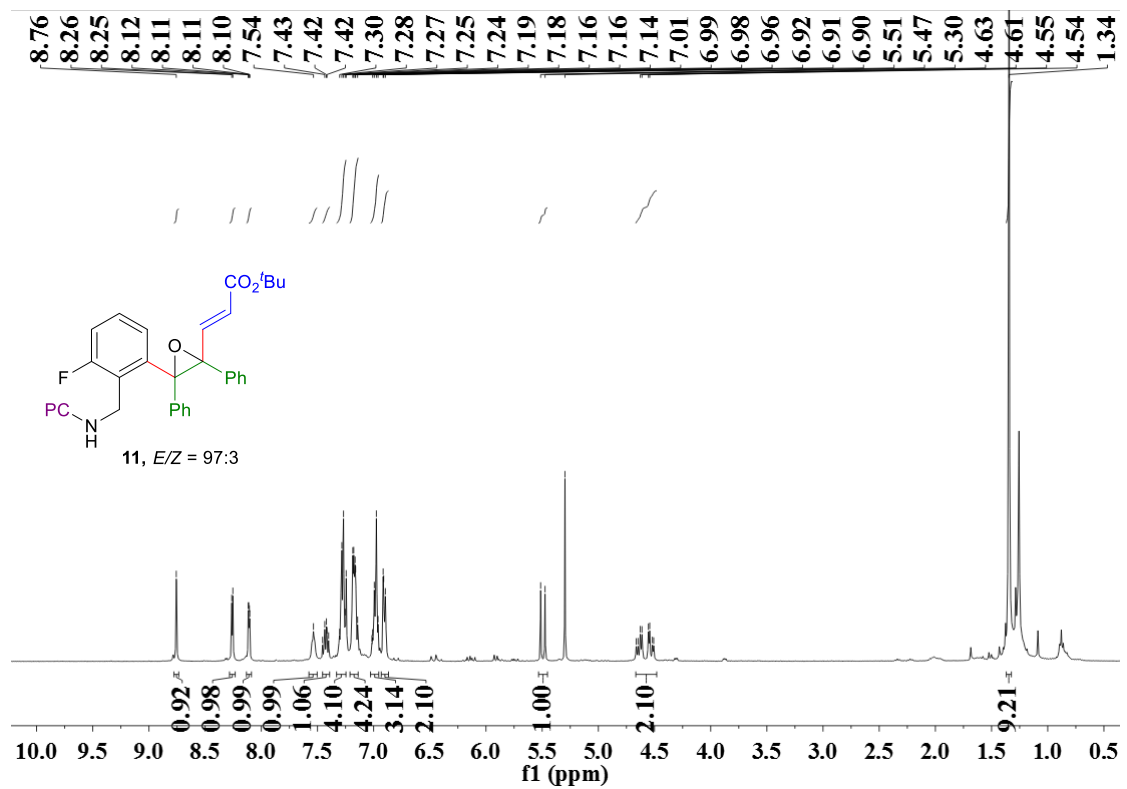

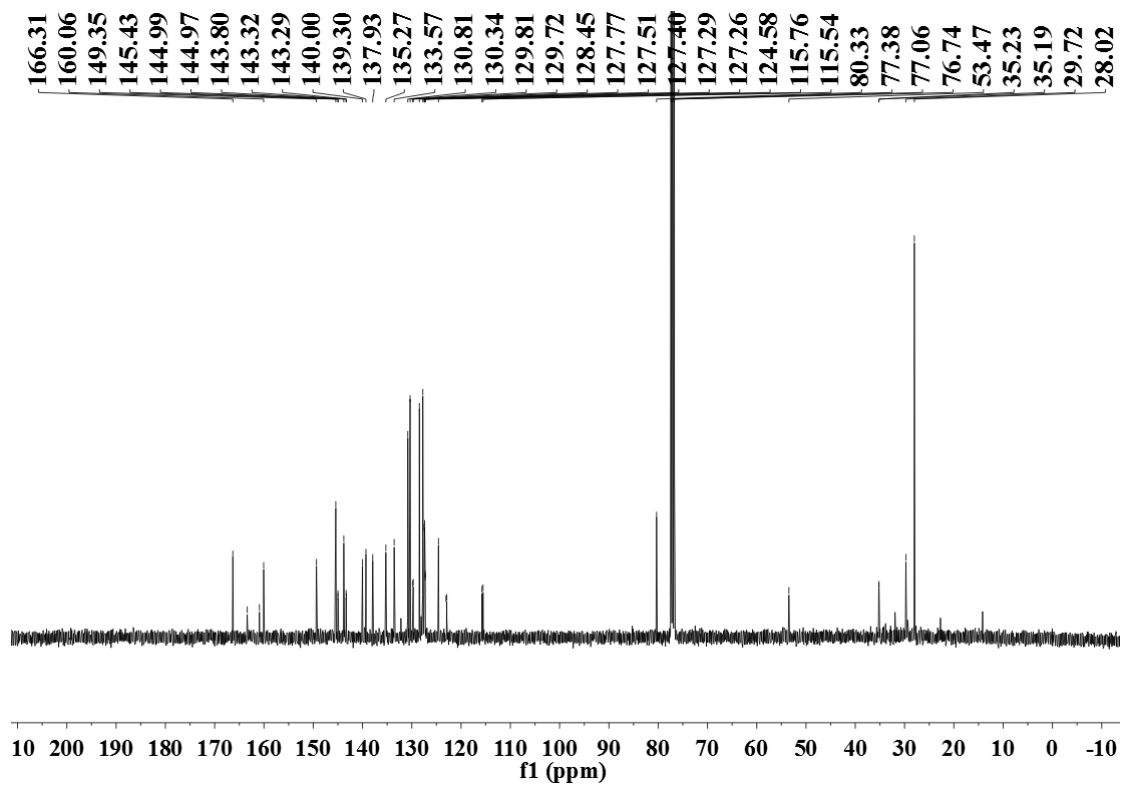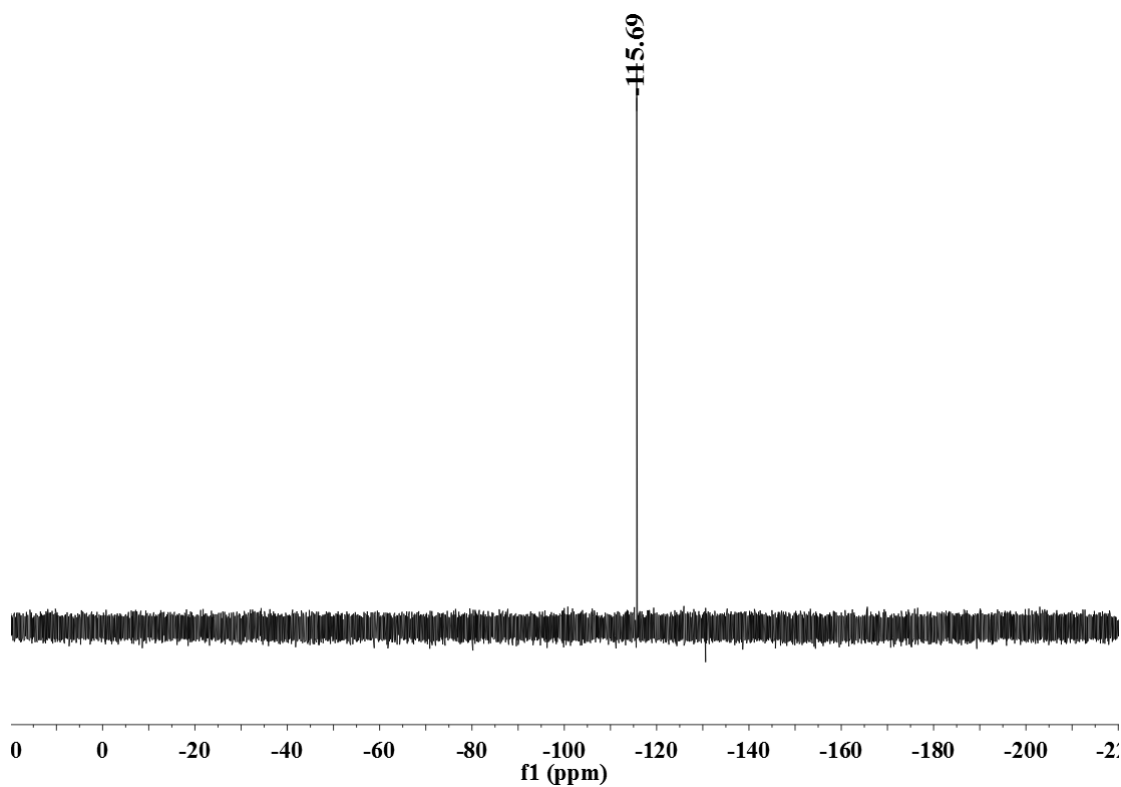

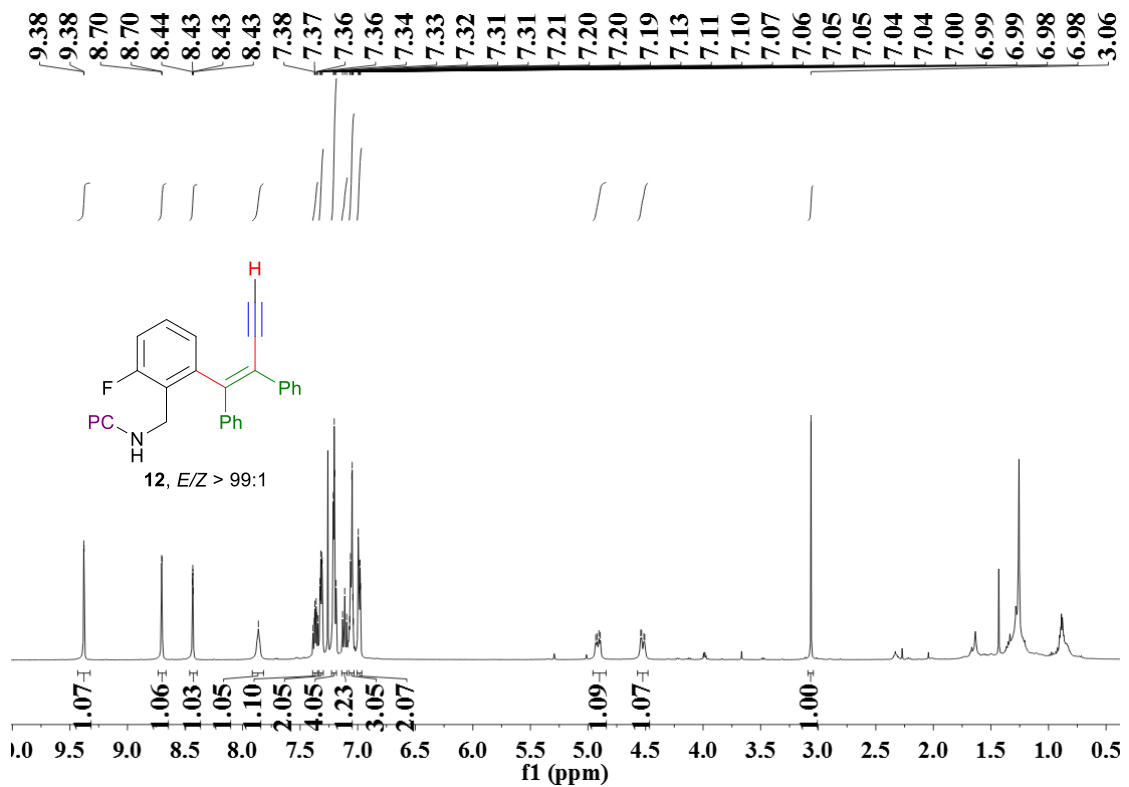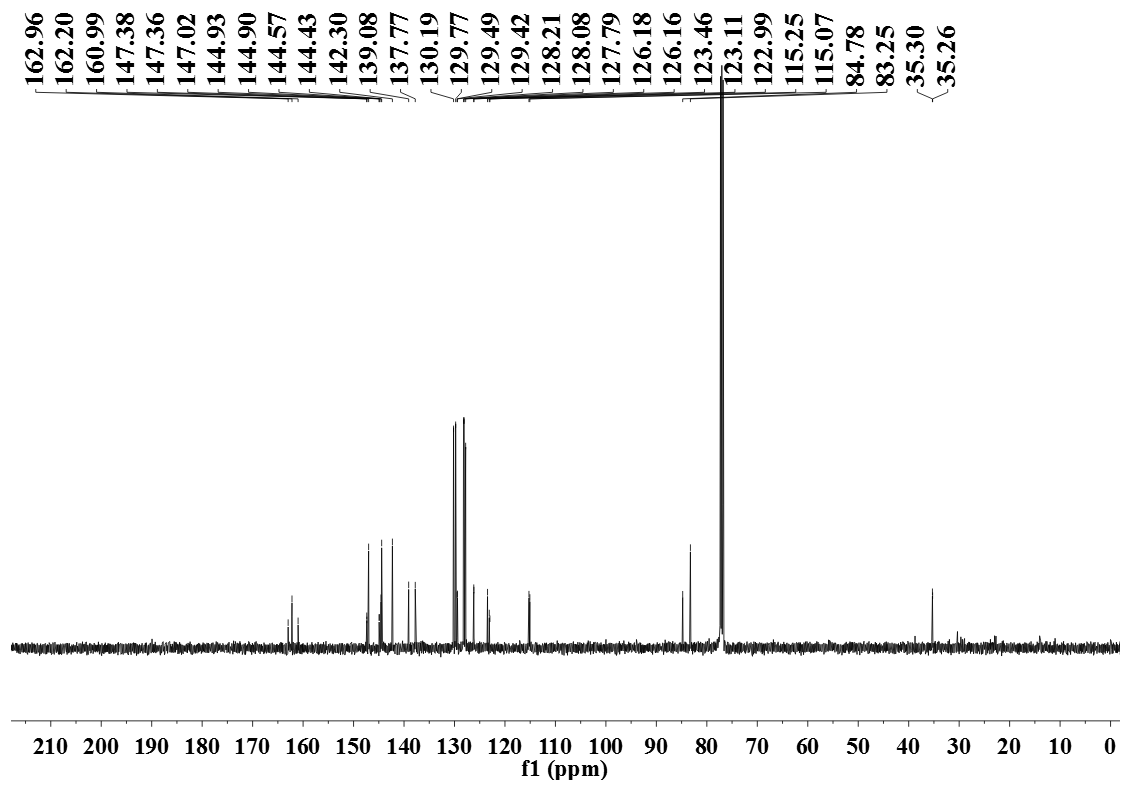

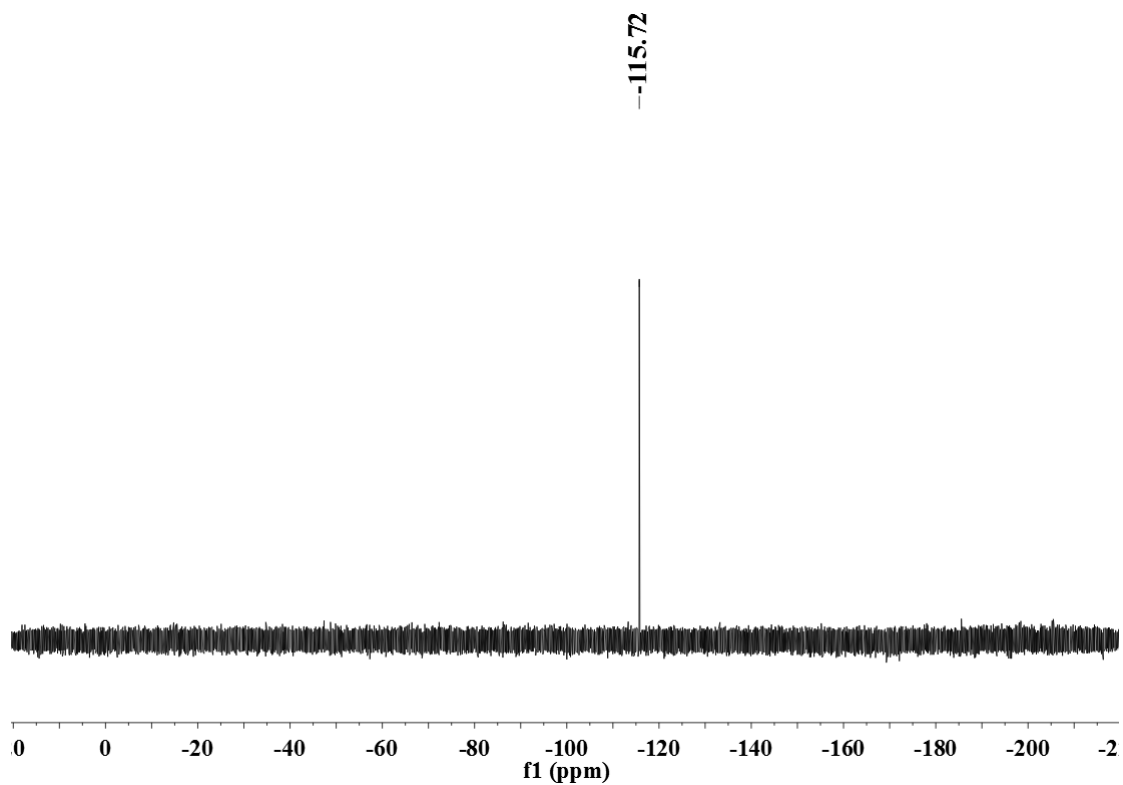

## 10. X-Ray Crystal Data

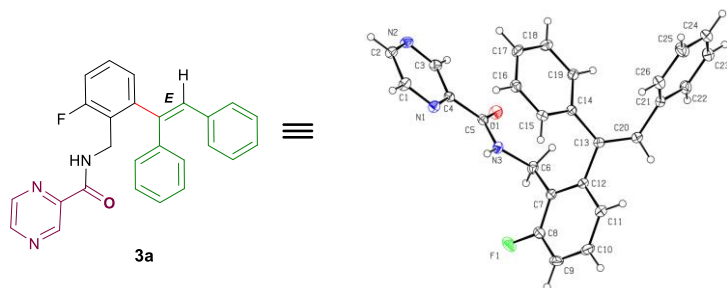

**230103\_ZJ\_ZYH\_3aa\_0m**

**Table 1 Crystal data and structure refinement for 230103\_ZJ\_ZYH\_3aa\_0m.**

|                     |                                                   |
|---------------------|---------------------------------------------------|
| Identification code | 230103_ZJ_ZYH_3aa_0m                              |
| Empirical formula   | C <sub>26</sub> H <sub>20</sub> FN <sub>3</sub> O |
| Formula weight      | 409.45                                            |
| Temperature/K       | 170.00                                            |
| Crystal system      | monoclinic                                        |
| Space group         | P2 <sub>1</sub> /n                                |
| a/Å                 | 9.4685(11)                                        |
| b/Å                 | 5.7414(7)                                         |
| c/Å                 | 37.581(4)                                         |
| $\alpha$ /°         | 90                                                |



|                                                |                                                               |
|------------------------------------------------|---------------------------------------------------------------|
| $\beta/^\circ$                                 | 97.187(3)                                                     |
| $\gamma/^\circ$                                | 90                                                            |
| Volume/ $\text{\AA}^3$                         | 2027.0(4)                                                     |
| Z                                              | 4                                                             |
| $\rho_{\text{calc}}/\text{cm}^3$               | 1.342                                                         |
| $\mu/\text{mm}^{-1}$                           | 0.461                                                         |
| F(000)                                         | 856.0                                                         |
| Crystal size/ $\text{mm}^3$                    | $0.32 \times 0.08 \times 0.06$                                |
| Radiation                                      | GaK $\alpha$ ( $\lambda = 1.34139$ )                          |
| 2 $\Theta$ range for data collection/ $^\circ$ | 4.124 to 121.382                                              |
| Index ranges                                   | $-12 \leq h \leq 12, -7 \leq k \leq 7, -48 \leq l \leq 48$    |
| Reflections collected                          | 34858                                                         |
| Independent reflections                        | 4663 [ $R_{\text{int}} = 0.0665, R_{\text{sigma}} = 0.0654$ ] |
| Data/restraints/parameters                     | 4663/0/280                                                    |
| Goodness-of-fit on $F^2$                       | 1.094                                                         |
| Final R indexes [ $I \geq 2\sigma(I)$ ]        | $R_1 = 0.0489, wR_2 = 0.1157$                                 |
| Final R indexes [all data]                     | $R_1 = 0.0520, wR_2 = 0.1178$                                 |
| Largest diff. peak/hole / $e \text{\AA}^{-3}$  | 0.25/-0.28                                                    |

**Table 2 Fractional Atomic Coordinates ( $\times 10^4$ ) and Equivalent Isotropic Displacement Parameters ( $\text{\AA}^2 \times 10^3$ ) for 230103\_ZJ\_ZYH\_3aa\_0m.  $U_{\text{eq}}$  is defined as 1/3 of the trace of the orthogonalised  $U_{ij}$  tensor.**

| Atom | x          | y           | z         | $U(\text{eq})$ |
|------|------------|-------------|-----------|----------------|
| F1   | 752.3(9)   | 4742.6(18)  | 5470.6(2) | 44.4(2)        |
| O1   | 4314.4(10) | -1377.5(16) | 5620.9(3) | 33.5(2)        |
| N1   | 6338.4(11) | 3230.5(18)  | 5302.3(3) | 26.1(2)        |
| N2   | 8010.0(12) | -616.6(18)  | 5156.0(3) | 28.6(2)        |
| N3   | 3998.5(11) | 2507.7(19)  | 5662.4(3) | 24.8(2)        |
| C1   | 7521.2(14) | 3453(2)     | 5144.6(4) | 29.3(3)        |
| C2   | 8354.3(13) | 1553(2)     | 5075.8(4) | 27.5(3)        |
| C3   | 6805.7(13) | -847(2)     | 5305.3(3) | 26.4(3)        |
| C4   | 5990.6(12) | 1053(2)     | 5380.8(3) | 21.7(2)        |
| C5   | 4690.4(13) | 628(2)      | 5563.4(3) | 23.8(2)        |
| C6   | 2813.8(13) | 2107(2)     | 5869.4(3) | 27.6(3)        |
| C7   | 2220.8(12) | 4290(2)     | 6016.5(3) | 24.9(3)        |
| C8   | 1150.2(13) | 5510(3)     | 5809.7(3) | 30.3(3)        |
| C9   | 443.7(13)  | 7406(3)     | 5928.8(4) | 36.0(3)        |
| C10  | 828.0(15)  | 8132(3)     | 6276.8(4) | 36.9(3)        |
| C11  | 1892.7(14) | 6978(3)     | 6495.6(4) | 32.5(3)        |
| C12  | 2596.8(12) | 5062(2)     | 6370.4(3) | 25.2(3)        |
| C13  | 3734.1(12) | 3900(2)     | 6621.5(3) | 24.6(3)        |

**Table 2 Fractional Atomic Coordinates ( $\times 10^4$ ) and Equivalent Isotropic Displacement Parameters ( $\text{\AA}^2 \times 10^3$ ) for 230103\_ZJ\_ZYH\_3aa\_0m.  $U_{\text{eq}}$  is defined as 1/3 of the trace of the orthogonalised  $U_{ij}$  tensor.**

| Atom | x          | y       | z         | $U(\text{eq})$ |
|------|------------|---------|-----------|----------------|
| C14  | 5171.1(12) | 3696(2) | 6501.9(3) | 22.3(2)        |
| C15  | 5699.7(13) | 5471(2) | 6301.6(3) | 25.2(3)        |
| C16  | 7018.0(13) | 5251(2) | 6178.9(3) | 28.4(3)        |
| C17  | 7823.8(13) | 3256(2) | 6251.3(4) | 30.6(3)        |
| C18  | 7305.7(14) | 1473(2) | 6446.8(4) | 31.2(3)        |
| C19  | 5990.0(13) | 1685(2) | 6571.7(3) | 26.3(3)        |
| C20  | 3413.4(13) | 3188(3) | 6941.7(3) | 29.8(3)        |
| C21  | 4417.0(13) | 2444(2) | 7256.1(3) | 28.5(3)        |
| C22  | 4196.6(15) | 415(3)  | 7445.5(4) | 36.4(3)        |
| C23  | 5124.0(16) | -195(3) | 7746.3(4) | 40.6(3)        |
| C24  | 6258.1(16) | 1232(3) | 7867.4(4) | 40.9(4)        |
| C25  | 6478.8(17) | 3259(3) | 7684.3(4) | 42.0(4)        |
| C26  | 5565.1(15) | 3858(3) | 7379.7(4) | 34.3(3)        |

**Table 3 Anisotropic Displacement Parameters ( $\text{\AA}^2 \times 10^3$ ) for 230103\_ZJ\_ZYH\_3aa\_0m. The Anisotropic displacement factor exponent takes the form:  $-2\pi^2[h^2a^2U_{11}+2hka*b*U_{12}+\dots]$ .**

| Atom | $U_{11}$ | $U_{22}$ | $U_{33}$ | $U_{23}$ | $U_{13}$ | $U_{12}$ |
|------|----------|----------|----------|----------|----------|----------|
| F1   | 36.6(5)  | 63.2(6)  | 30.0(4)  | 9.1(4)   | -8.8(3)  | -8.5(4)  |
| O1   | 33.9(5)  | 26.2(5)  | 41.5(5)  | 5.3(4)   | 9.0(4)   | -3.5(4)  |
| N1   | 29.0(5)  | 18.9(5)  | 31.2(5)  | -0.4(4)  | 7.7(4)   | 1.5(4)   |
| N2   | 27.9(5)  | 21.3(5)  | 37.2(6)  | 1.9(4)   | 5.7(4)   | 4.7(4)   |
| N3   | 23.6(5)  | 26.6(5)  | 25.1(5)  | -0.3(4)  | 6.4(4)   | -3.0(4)  |
| C1   | 32.5(6)  | 18.2(5)  | 39.1(7)  | 0.1(5)   | 12.6(5)  | -1.3(5)  |
| C2   | 26.1(6)  | 23.1(6)  | 34.4(6)  | -0.4(5)  | 7.6(5)   | 0.1(5)   |
| C3   | 28.5(6)  | 17.9(5)  | 32.5(6)  | 2.5(5)   | 3.2(5)   | 0.5(5)   |
| C4   | 22.6(5)  | 21.5(5)  | 20.2(5)  | -0.2(4)  | -0.5(4)  | 0.0(4)   |
| C5   | 23.5(5)  | 25.9(6)  | 21.1(5)  | 2.2(4)   | -0.3(4)  | -1.3(5)  |
| C6   | 24.7(6)  | 32.7(6)  | 26.2(6)  | -1.0(5)  | 6.6(5)   | -6.3(5)  |
| C7   | 17.4(5)  | 32.3(6)  | 25.6(6)  | 4.4(5)   | 5.1(4)   | -2.9(5)  |
| C8   | 19.7(5)  | 42.2(7)  | 28.5(6)  | 10.2(5)  | 0.9(5)   | -6.5(5)  |
| C9   | 18.0(6)  | 43.6(8)  | 46.4(8)  | 20.6(6)  | 3.7(5)   | 3.0(5)   |
| C10  | 26.9(6)  | 37.1(7)  | 49.1(8)  | 10.2(6)  | 13.6(6)  | 10.6(6)  |
| C11  | 28.1(6)  | 38.0(7)  | 32.4(6)  | 1.0(5)   | 8.2(5)   | 7.3(5)   |

**Table 3 Anisotropic Displacement Parameters ( $\text{\AA}^2 \times 10^3$ ) for 230103\_ZJ\_ZYH\_3aa\_0m. The Anisotropic displacement factor exponent takes the form:  $-2\pi^2[h^2a^2U_{11}+2hka*b*U_{12}+\dots]$ .**

| Atom | $U_{11}$ | $U_{22}$ | $U_{33}$ | $U_{23}$ | $U_{13}$ | $U_{12}$ |
|------|----------|----------|----------|----------|----------|----------|
| C12  | 18.8(5)  | 31.8(6)  | 25.6(6)  | 3.2(5)   | 5.4(4)   | 3.2(5)   |
| C13  | 21.8(5)  | 27.4(6)  | 24.5(6)  | 0.1(5)   | 1.9(4)   | 3.2(5)   |
| C14  | 21.0(5)  | 25.8(6)  | 19.9(5)  | -1.1(4)  | 1.4(4)   | 1.1(4)   |
| C15  | 24.4(6)  | 25.1(6)  | 25.3(6)  | 1.7(5)   | -0.5(4)  | 1.2(5)   |
| C16  | 26.4(6)  | 31.8(6)  | 27.2(6)  | 2.4(5)   | 3.7(5)   | -5.5(5)  |
| C17  | 22.0(6)  | 39.2(7)  | 31.5(6)  | -2.7(5)  | 6.8(5)   | 1.1(5)   |
| C18  | 27.6(6)  | 31.0(7)  | 35.6(7)  | 0.6(5)   | 6.2(5)   | 7.7(5)   |
| C19  | 27.0(6)  | 25.2(6)  | 27.2(6)  | 2.7(5)   | 5.7(5)   | 2.7(5)   |
| C20  | 21.5(6)  | 41.6(7)  | 26.7(6)  | 2.8(5)   | 4.4(5)   | 3.8(5)   |
| C21  | 25.6(6)  | 39.3(7)  | 21.4(6)  | 1.8(5)   | 6.2(4)   | 5.2(5)   |
| C22  | 30.8(7)  | 48.0(8)  | 31.2(7)  | 7.9(6)   | 6.6(5)   | -3.1(6)  |
| C23  | 38.0(7)  | 51.5(9)  | 33.6(7)  | 15.6(6)  | 9.3(6)   | 6.0(7)   |
| C24  | 35.9(7)  | 59.8(10) | 26.2(6)  | 7.8(6)   | 0.4(5)   | 9.5(7)   |
| C25  | 40.2(8)  | 51.4(9)  | 32.0(7)  | -0.3(6)  | -4.6(6)  | -3.4(7)  |
| C26  | 37.7(7)  | 36.1(7)  | 28.5(6)  | 1.9(5)   | 1.2(5)   | -0.2(6)  |

**Table 4 Bond Lengths for 230103\_ZJ\_ZYH\_3aa\_0m.**

| Atom | Atom | Length/ $\text{\AA}$ | Atom | Atom | Length/ $\text{\AA}$ |
|------|------|----------------------|------|------|----------------------|
| F1   | C8   | 1.3567(16)           | C11  | C12  | 1.3977(18)           |
| O1   | C5   | 1.2325(15)           | C12  | C13  | 1.4972(16)           |
| N1   | C1   | 1.3371(16)           | C13  | C14  | 1.4900(16)           |
| N1   | C4   | 1.3352(16)           | C13  | C20  | 1.3413(18)           |
| N2   | C2   | 1.3315(17)           | C14  | C15  | 1.3964(17)           |
| N2   | C3   | 1.3389(17)           | C14  | C19  | 1.3974(17)           |
| N3   | C5   | 1.3389(16)           | C15  | C16  | 1.3895(18)           |
| N3   | C6   | 1.4611(15)           | C16  | C17  | 1.3842(19)           |
| C1   | C2   | 1.3893(17)           | C17  | C18  | 1.385(2)             |
| C3   | C4   | 1.3859(17)           | C18  | C19  | 1.3904(18)           |
| C4   | C5   | 1.5024(17)           | C20  | C21  | 1.4833(17)           |
| C6   | C7   | 1.5067(18)           | C21  | C22  | 1.394(2)             |
| C7   | C8   | 1.3871(18)           | C21  | C26  | 1.389(2)             |
| C7   | C12  | 1.4049(18)           | C22  | C23  | 1.387(2)             |
| C8   | C9   | 1.382(2)             | C23  | C24  | 1.382(2)             |
| C9   | C10  | 1.377(2)             | C24  | C25  | 1.381(2)             |
| C10  | C11  | 1.3874(19)           | C25  | C26  | 1.389(2)             |

**Table 5 Bond Angles for 230103\_ZJ\_ZYH\_3aa\_0m.**

| Atom | Atom | Atom | Angle/°    | Atom | Atom | Atom | Angle/°    |
|------|------|------|------------|------|------|------|------------|
| C4   | N1   | C1   | 115.51(10) | C11  | C12  | C7   | 119.47(11) |
| C2   | N2   | C3   | 115.63(11) | C11  | C12  | C13  | 118.29(11) |
| C5   | N3   | C6   | 117.12(10) | C14  | C13  | C12  | 117.18(10) |
| N1   | C1   | C2   | 122.29(11) | C20  | C13  | C12  | 118.41(11) |
| N2   | C2   | C1   | 122.11(11) | C20  | C13  | C14  | 124.37(11) |
| N2   | C3   | C4   | 122.24(11) | C15  | C14  | C13  | 120.51(11) |
| N1   | C4   | C3   | 122.18(11) | C15  | C14  | C19  | 118.45(11) |
| N1   | C4   | C5   | 119.46(10) | C19  | C14  | C13  | 120.97(11) |
| C3   | C4   | C5   | 118.36(11) | C16  | C15  | C14  | 120.66(11) |
| O1   | C5   | N3   | 122.84(11) | C17  | C16  | C15  | 120.40(12) |
| O1   | C5   | C4   | 120.19(11) | C16  | C17  | C18  | 119.52(12) |
| N3   | C5   | C4   | 116.96(10) | C17  | C18  | C19  | 120.40(12) |
| N3   | C6   | C7   | 114.23(10) | C18  | C19  | C14  | 120.57(12) |
| C8   | C7   | C6   | 119.61(12) | C13  | C20  | C21  | 127.44(11) |
| C8   | C7   | C12  | 116.87(12) | C22  | C21  | C20  | 121.69(13) |
| C12  | C7   | C6   | 123.23(11) | C26  | C21  | C20  | 119.64(12) |
| F1   | C8   | C7   | 117.39(13) | C26  | C21  | C22  | 118.57(12) |
| F1   | C8   | C9   | 118.12(12) | C23  | C22  | C21  | 120.46(14) |
| C9   | C8   | C7   | 124.47(13) | C24  | C23  | C22  | 120.38(14) |
| C10  | C9   | C8   | 117.71(12) | C25  | C24  | C23  | 119.68(13) |
| C9   | C10  | C11  | 120.28(13) | C24  | C25  | C26  | 120.11(15) |
| C10  | C11  | C12  | 121.21(13) | C25  | C26  | C21  | 120.78(14) |
| C7   | C12  | C13  | 122.23(11) |      |      |      |            |

**Table 6 Torsion Angles for 230103\_ZJ\_ZYH\_3aa\_0m.**

| A  | B  | C  | D   | Angle/°     | A   | B   | C   | D   | Angle/°     |
|----|----|----|-----|-------------|-----|-----|-----|-----|-------------|
| F1 | C8 | C9 | C10 | 178.23(12)  | C10 | C11 | C12 | C13 | -179.96(12) |
| N1 | C1 | C2 | N2  | 1.4(2)      | C11 | C12 | C13 | C14 | -124.09(13) |
| N1 | C4 | C5 | O1  | 176.24(11)  | C11 | C12 | C13 | C20 | 53.66(17)   |
| N1 | C4 | C5 | N3  | -4.82(16)   | C12 | C7  | C8  | F1  | -178.32(11) |
| N2 | C3 | C4 | N1  | 1.50(19)    | C12 | C7  | C8  | C9  | 0.05(19)    |
| N2 | C3 | C4 | C5  | -177.34(11) | C12 | C13 | C14 | C15 | 36.13(16)   |
| N3 | C6 | C7 | C8  | 88.23(14)   | C12 | C13 | C14 | C19 | -140.67(12) |
| N3 | C6 | C7 | C12 | -98.21(14)  | C12 | C13 | C20 | C21 | -166.77(13) |
| C1 | N1 | C4 | C3  | 0.28(18)    | C13 | C14 | C15 | C16 | -177.73(11) |
| C1 | N1 | C4 | C5  | 179.11(11)  | C13 | C14 | C19 | C18 | 177.46(12)  |

**Table 6 Torsion Angles for 230103\_ZJ\_ZYH\_3aa\_0m.**

| A   | B   | C   | D   | Angle/°     | A   | B   | C   | D   | Angle/°     |
|-----|-----|-----|-----|-------------|-----|-----|-----|-----|-------------|
| C2  | N2  | C3  | C4  | -1.75(18)   | C13 | C20 | C21 | C22 | -132.74(16) |
| C3  | N2  | C2  | C1  | 0.36(19)    | C13 | C20 | C21 | C26 | 51.0(2)     |
| C3  | C4  | C5  | O1  | -4.88(17)   | C14 | C13 | C20 | C21 | 10.8(2)     |
| C3  | C4  | C5  | N3  | 174.06(11)  | C14 | C15 | C16 | C17 | 0.50(19)    |
| C4  | N1  | C1  | C2  | -1.67(19)   | C15 | C14 | C19 | C18 | 0.60(18)    |
| C5  | N3  | C6  | C7  | 171.68(10)  | C15 | C16 | C17 | C18 | 0.1(2)      |
| C6  | N3  | C5  | O1  | 4.46(17)    | C16 | C17 | C18 | C19 | -0.4(2)     |
| C6  | N3  | C5  | C4  | -174.45(10) | C17 | C18 | C19 | C14 | 0.0(2)      |
| C6  | C7  | C8  | F1  | -4.36(17)   | C19 | C14 | C15 | C16 | -0.85(18)   |
| C6  | C7  | C8  | C9  | 174.01(12)  | C20 | C13 | C14 | C15 | -141.47(14) |
| C6  | C7  | C12 | C11 | -173.71(11) | C20 | C13 | C14 | C19 | 41.73(19)   |
| C6  | C7  | C12 | C13 | 6.25(18)    | C20 | C21 | C22 | C23 | -177.62(13) |
| C7  | C8  | C9  | C10 | -0.1(2)     | C20 | C21 | C26 | C25 | 176.70(13)  |
| C7  | C12 | C13 | C14 | 55.96(16)   | C21 | C22 | C23 | C24 | 1.6(2)      |
| C7  | C12 | C13 | C20 | -126.29(14) | C22 | C21 | C26 | C25 | 0.3(2)      |
| C8  | C7  | C12 | C11 | 0.02(18)    | C22 | C23 | C24 | C25 | -0.9(2)     |
| C8  | C7  | C12 | C13 | 179.97(11)  | C23 | C24 | C25 | C26 | -0.1(2)     |
| C8  | C9  | C10 | C11 | 0.1(2)      | C24 | C25 | C26 | C21 | 0.4(2)      |
| C9  | C10 | C11 | C12 | -0.1(2)     | C26 | C21 | C22 | C23 | -1.3(2)     |
| C10 | C11 | C12 | C7  | 0.0(2)      |     |     |     |     |             |

**Table 7 Hydrogen Atom Coordinates ( $\text{\AA}\times 10^4$ ) and Isotropic Displacement Parameters ( $\text{\AA}^2\times 10^3$ ) for 230103\_ZJ\_ZYH\_3aa\_0m.**

| Atom | x       | y        | z       | U(eq) |
|------|---------|----------|---------|-------|
| H3   | 4246.67 | 3923.2   | 5605.25 | 30    |
| H1   | 7801.74 | 4962.22  | 5077.32 | 35    |
| H2   | 9196.53 | 1809.49  | 4968.04 | 33    |
| H3A  | 6499.48 | -2363.82 | 5361.34 | 32    |
| H6A  | 3137.55 | 1052.97  | 6071.71 | 33    |
| H6B  | 2040.64 | 1305.24  | 5714.44 | 33    |
| H9   | -282.05 | 8183.31  | 5775.91 | 43    |
| H10  | 362.03  | 9429.43  | 6367.3  | 44    |
| H11  | 2147.79 | 7497.88  | 6734.98 | 39    |
| H15  | 5152.43 | 6842.95  | 6248.65 | 30    |
| H16  | 7368.3  | 6477.08  | 6044.48 | 34    |
| H17  | 8725.53 | 3111.07  | 6167.42 | 37    |

**Table 7 Hydrogen Atom Coordinates ( $\text{\AA}\times 10^4$ ) and Isotropic Displacement Parameters ( $\text{\AA}^2\times 10^3$ ) for 230103\_ZJ\_ZYH\_3aa\_0m.**

| Atom | x       | y        | z       | U(eq) |
|------|---------|----------|---------|-------|
| H18  | 7852.82 | 97.33    | 6495.96 | 37    |
| H19  | 5644.82 | 451.74   | 6705.56 | 32    |
| H20  | 2430.91 | 3156.33  | 6970.49 | 36    |
| H22  | 3405.59 | -556.71  | 7367.91 | 44    |
| H23  | 4978.7  | -1601.12 | 7869.81 | 49    |
| H24  | 6882.99 | 821.42   | 8075.71 | 49    |
| H25  | 7256.85 | 4245.78  | 7766.81 | 50    |
| H26  | 5727.29 | 5250.05  | 7254.35 | 41    |

### Experimental

Single crystals of  $\text{C}_{26}\text{H}_{20}\text{FN}_3\text{O}$  [230103\_ZJ\_ZYH\_3aa\_0m] were [1]. A suitable crystal was selected and [1] on a diffractometer. The crystal was kept at 170.00 K during data collection. Using Olex2 [1], the structure was solved with the SHELXT [2] structure solution program using Intrinsic Phasing and refined with the SHELXL [3] refinement package using Least Squares minimisation.

1. Dolomanov, O.V., Bourhis, L.J., Gildea, R.J, Howard, J.A.K. & Puschmann, H. (2009), J. Appl. Cryst. 42, 339-341.
2. Sheldrick, G.M. (2015). Acta Cryst. A71, 3-8.
3. Sheldrick, G.M. (2015). Acta Cryst. C71, 3-8.

### Crystal structure determination of [230103\_ZJ\_ZYH\_3aa\_0m]

**Crystal Data** for  $\text{C}_{26}\text{H}_{20}\text{FN}_3\text{O}$  ( $M=409.45$  g/mol): monoclinic, space group  $P2_1/n$  (no. 14),  $a = 9.4685(11)$   $\text{\AA}$ ,  $b = 5.7414(7)$   $\text{\AA}$ ,  $c = 37.581(4)$   $\text{\AA}$ ,  $\beta = 97.187(3)^\circ$ ,  $V = 2027.0(4)$   $\text{\AA}^3$ ,  $Z = 4$ ,  $T = 170.00$  K,  $\mu(\text{GaK}\alpha) = 0.461$   $\text{mm}^{-1}$ ,  $D_{\text{calc}} = 1.342$   $\text{g/cm}^3$ , 34858 reflections measured ( $4.124^\circ \leq 2\theta \leq 121.382^\circ$ ), 4663 unique ( $R_{\text{int}} = 0.0665$ ,  $R_{\text{sigma}} = 0.0654$ ) which were used in all calculations. The final  $R_1$  was 0.0489 ( $I > 2\sigma(I)$ ) and  $wR_2$  was 0.1178 (all data).

### Refinement model description

Number of restraints0, number of constraintsunknown.

Details:

1. Fixed Uiso

At 1.2 times of:

All C(H) groups, All C(H,H) groups, All N(H) groups

- 2.a Secondary CH2 refined with riding coordinates:

C6(H6A,H6B)

- 2.b Aromatic/amide H refined with riding coordinates:

N3(H3), C1(H1), C2(H2), C3(H3A), C9(H9), C10(H10), C11(H11), C15(H15),

C16(H16), C17(H17), C18(H18), C19(H19), C20(H20), C22(H22), C23(H23), C24(H24),

C25(H25), C26(H26)

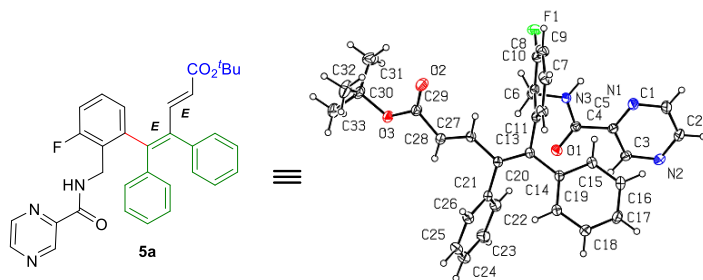

230103\_ZJ\_ZYH\_5aa\_tBu\_0m

Table 1 Crystal data and structure refinement for 230103\_ZJ\_ZYH\_5aa\_tBu\_0m.

|                                             |                                                                |
|---------------------------------------------|----------------------------------------------------------------|
| Identification code                         | 230103_ZJ_ZYH_5aa_tBu_0m                                       |
| Empirical formula                           | C <sub>33</sub> H <sub>30</sub> FN <sub>3</sub> O <sub>3</sub> |
| Formula weight                              | 535.60                                                         |
| Temperature/K                               | 170.00                                                         |
| Crystal system                              | triclinic                                                      |
| Space group                                 | P-1                                                            |
| a/Å                                         | 10.3014(13)                                                    |
| b/Å                                         | 15.605(2)                                                      |
| c/Å                                         | 18.244(2)                                                      |
| α/°                                         | 82.729(4)                                                      |
| β/°                                         | 80.543(4)                                                      |
| γ/°                                         | 81.413(4)                                                      |
| Volume/Å <sup>3</sup>                       | 2844.7(6)                                                      |
| Z                                           | 4                                                              |
| ρ <sub>calc</sub> /cm <sup>3</sup>          | 1.251                                                          |
| μ/mm <sup>-1</sup>                          | 0.440                                                          |
| F(000)                                      | 1128.0                                                         |
| Crystal size/mm <sup>3</sup>                | 0.08 × 0.05 × 0.04                                             |
| Radiation                                   | GaKα (λ = 1.34139)                                             |
| 2θ range for data collection/°              | 4.296 to 121.18                                                |
| Index ranges                                | -13 ≤ h ≤ 13, -20 ≤ k ≤ 20, -23 ≤ l ≤ 23                       |
| Reflections collected                       | 54150                                                          |
| Independent reflections                     | 12693 [R <sub>int</sub> = 0.0596, R <sub>sigma</sub> = 0.0665] |
| Data/restraints/parameters                  | 12693/0/727                                                    |
| Goodness-of-fit on F <sup>2</sup>           | 1.092                                                          |
| Final R indexes [I ≥ 2σ (I)]                | R <sub>1</sub> = 0.0502, wR <sub>2</sub> = 0.1294              |
| Final R indexes [all data]                  | R <sub>1</sub> = 0.0549, wR <sub>2</sub> = 0.1329              |
| Largest diff. peak/hole / e Å <sup>-3</sup> | 0.26/-0.29                                                     |

**Table 2 Fractional Atomic Coordinates ( $\times 10^4$ ) and Equivalent Isotropic Displacement Parameters ( $\text{\AA}^2 \times 10^3$ ) for 230103\_ZJ\_ZYH\_5aa\_tBu\_0m.  $U_{eq}$  is defined as 1/3 of the trace of the orthogonalised  $U_{ij}$  tensor.**

| Atom | <i>x</i>   | <i>y</i>   | <i>z</i>  | $U_{eq}$  |
|------|------------|------------|-----------|-----------|
| F1   | 11077.9(7) | 4637.6(5)  | 7779.0(5) | 45.3(2)   |
| O1   | 7167.0(9)  | 2934.7(6)  | 7109.2(5) | 35.64(19) |
| O2   | 8866.3(10) | 6938.8(7)  | 6099.4(5) | 46.7(2)   |
| O3   | 7963.0(9)  | 6975.3(6)  | 5041.1(4) | 34.63(19) |
| N1   | 8831.9(12) | 1710.3(7)  | 8536.9(7) | 41.2(3)   |
| N2   | 7077.5(11) | 546.5(7)   | 8424.5(6) | 36.4(2)   |
| N3   | 8940.4(9)  | 3196.2(6)  | 7608.0(6) | 28.6(2)   |
| C1   | 8777.0(16) | 965.2(10)  | 8981.9(9) | 49.3(4)   |
| C2   | 7894.5(14) | 400.3(9)   | 8931.1(8) | 39.6(3)   |
| C3   | 7161.2(11) | 1278.6(8)  | 7957.4(7) | 30.8(2)   |
| C4   | 8014.9(11) | 1864.5(7)  | 8023.4(6) | 27.7(2)   |
| C5   | 8001.0(11) | 2714.8(7)  | 7531.2(6) | 27.0(2)   |
| C6   | 8962.1(12) | 4091.2(7)  | 7265.1(6) | 29.4(2)   |
| C7   | 8758.4(11) | 4701.6(7)  | 7867.9(6) | 27.8(2)   |
| C8   | 9848.6(12) | 4920.9(8)  | 8126.8(7) | 34.0(3)   |
| C9   | 9766.5(14) | 5413.6(9)  | 8710.8(8) | 41.4(3)   |
| C10  | 8519.8(15) | 5700.0(9)  | 9068.9(8) | 42.3(3)   |
| C11  | 7391.9(13) | 5513.6(8)  | 8828.5(7) | 35.8(3)   |
| C12  | 7495.7(11) | 5034.6(7)  | 8217.7(6) | 27.6(2)   |
| C13  | 6241.6(11) | 4929.5(7)  | 7939.0(6) | 27.1(2)   |
| C14  | 5355.9(11) | 4377.2(7)  | 8450.3(6) | 27.6(2)   |
| C15  | 5922.7(12) | 3669.0(8)  | 8897.2(7) | 32.6(2)   |
| C16  | 5135.1(14) | 3131.8(8)  | 9381.3(7) | 37.9(3)   |
| C17  | 3766.2(14) | 3301.8(9)  | 9441.7(7) | 39.7(3)   |
| C18  | 3190.3(13) | 4013.2(9)  | 9020.9(7) | 39.6(3)   |
| C19  | 3971.9(12) | 4546.9(8)  | 8526.4(7) | 33.6(3)   |
| C20  | 5996.1(11) | 5343.6(7)  | 7262.2(6) | 27.6(2)   |
| C21  | 4827.6(11) | 5271.6(8)  | 6890.8(6) | 30.2(2)   |
| C22  | 4790.7(14) | 4549.4(9)  | 6526.8(7) | 38.6(3)   |
| C23  | 3748.5(16) | 4530.0(11) | 6129.4(9) | 49.5(3)   |
| C24  | 2743.8(16) | 5217.5(11) | 6101.3(9) | 51.7(4)   |
| C25  | 2767.1(15) | 5936.4(10) | 6467.7(9) | 49.3(4)   |
| C26  | 3809.2(13) | 5966.8(9)  | 6855.3(8) | 39.8(3)   |
| C27  | 6947.9(11) | 5888.4(7)  | 6828.6(6) | 28.8(2)   |
| C28  | 6998.9(12) | 6199.6(8)  | 6108.4(7) | 31.9(2)   |



**Table 2 Fractional Atomic Coordinates ( $\times 10^4$ ) and Equivalent Isotropic Displacement Parameters ( $\text{\AA}^2 \times 10^3$ ) for 230103\_ZJ\_ZYH\_5aa\_tBu\_0m.  $U_{\text{eq}}$  is defined as 1/3 of the trace of the orthogonalised  $U_{ij}$  tensor.**

| Atom | x           | y           | z          | U(eq)     |
|------|-------------|-------------|------------|-----------|
| C29  | 8051.5(12)  | 6739.5(8)   | 5767.5(7)  | 33.2(2)   |
| C30  | 8875.0(14)  | 7546.4(10)  | 4577.6(7)  | 41.7(3)   |
| C31  | 10290.3(16) | 7101.8(16)  | 4539.5(9)  | 65.0(5)   |
| C32  | 8657(2)     | 8430.6(12)  | 4880.3(10) | 62.1(5)   |
| C33  | 8404.3(16)  | 7627.1(11)  | 3820.6(8)  | 49.6(4)   |
| F2   | 2872.1(7)   | 11449.1(5)  | 417.1(4)   | 36.50(17) |
| O4   | 7986.9(8)   | 9792.8(6)   | 641.4(5)   | 37.1(2)   |
| O5   | 3834.4(10)  | 9336.9(7)   | 3451.6(5)  | 47.4(2)   |
| O6   | 4982.4(9)   | 8942.0(6)   | 4426.0(5)  | 36.0(2)   |
| N4   | 5869.6(10)  | 8442.8(7)   | 1838.8(6)  | 34.1(2)   |
| N5   | 8297.9(10)  | 7364.5(7)   | 1854.9(7)  | 38.0(2)   |
| N6   | 5738.8(9)   | 9993.7(6)   | 956.4(5)   | 26.90(19) |
| C34  | 5974.3(13)  | 7674.2(8)   | 2251.8(8)  | 38.0(3)   |
| C35  | 7179.0(13)  | 7146.7(8)   | 2263.5(7)  | 36.1(3)   |
| C36  | 8183.0(12)  | 8127.5(8)   | 1428.4(7)  | 33.9(3)   |
| C37  | 6986.4(11)  | 8668.9(7)   | 1429.8(6)  | 26.9(2)   |
| C38  | 6950.3(11)  | 9540.7(7)   | 969.5(6)   | 27.3(2)   |
| C39  | 5543.1(11)  | 10881.2(7)  | 588.0(6)   | 27.1(2)   |
| C40  | 4615.9(11)  | 11458.4(7)  | 1105.6(6)  | 25.4(2)   |
| C41  | 3286.5(11)  | 11677.1(7)  | 1030.8(7)  | 28.9(2)   |
| C42  | 2350.8(12)  | 12101.8(8)  | 1538.4(8)  | 35.8(3)   |
| C43  | 2764.9(13)  | 12337.3(8)  | 2157.0(8)  | 38.6(3)   |
| C44  | 4092.0(12)  | 12159.2(8)  | 2249.3(7)  | 34.5(3)   |
| C45  | 5022.2(11)  | 11722.5(7)  | 1730.5(6)  | 27.4(2)   |
| C46  | 6446.1(11)  | 11541.9(7)  | 1848.9(6)  | 28.1(2)   |
| C47  | 7360.5(12)  | 12068.9(8)  | 1320.9(6)  | 31.0(2)   |
| C48  | 6922.7(14)  | 12930.7(9)  | 1067.5(7)  | 39.0(3)   |
| C49  | 7721.1(17)  | 13409.5(10) | 530.7(8)   | 49.5(4)   |
| C50  | 8968.9(16)  | 13030.1(12) | 228.8(8)   | 51.4(4)   |
| C51  | 9416.3(14)  | 12181.2(11) | 475.8(8)   | 46.7(3)   |
| C52  | 8626.7(13)  | 11698.0(9)  | 1018.6(7)  | 37.0(3)   |
| C53  | 6804.2(11)  | 10936.5(8)  | 2409.8(6)  | 28.9(2)   |
| C54  | 8126.5(11)  | 10839.7(8)  | 2666.9(6)  | 29.4(2)   |
| C55  | 8578.1(12)  | 11564.4(9)  | 2867.8(7)  | 33.5(3)   |
| C56  | 9787.1(13)  | 11486.6(10) | 3131.9(7)  | 42.1(3)   |
| C57  | 10562.3(13) | 10683.3(12) | 3194.1(8)  | 47.5(3)   |
| C58  | 10124.3(14) | 9959.9(11)  | 2998.7(8)  | 45.6(3)   |

**Table 2 Fractional Atomic Coordinates ( $\times 10^4$ ) and Equivalent Isotropic Displacement Parameters ( $\text{\AA}^2 \times 10^3$ ) for 230103\_ZJ\_ZYH\_5aa\_tBu\_0m.  $U_{eq}$  is defined as 1/3 of the trace of the orthogonalised  $U_{ij}$  tensor.**

| Atom | x          | y          | z          | $U_{eq}$ |
|------|------------|------------|------------|----------|
| C59  | 8916.3(13) | 10035.5(9) | 2735.6(7)  | 37.6(3)  |
| C60  | 5834.2(12) | 10374.6(8) | 2799.1(6)  | 31.0(2)  |
| C61  | 5909.4(13) | 9850.9(8)  | 3434.6(7)  | 33.7(3)  |
| C62  | 4789.5(13) | 9356.0(8)  | 3752.7(7)  | 34.1(3)  |
| C63  | 3994.0(13) | 8408.2(9)  | 4861.7(7)  | 37.6(3)  |
| C64  | 3943(2)    | 7631.9(11) | 4447.2(10) | 58.9(4)  |
| C65  | 2653.8(16) | 8953.6(13) | 5017.9(9)  | 56.2(4)  |
| C66  | 4583.8(16) | 8119.2(10) | 5580.5(8)  | 49.2(3)  |

**Table 3 Anisotropic Displacement Parameters ( $\text{\AA}^2 \times 10^3$ ) for 230103\_ZJ\_ZYH\_5aa\_tBu\_0m. The Anisotropic displacement factor exponent takes the form:  $-2\pi^2[h^2a^*U_{11}+2hka^*b^*U_{12}+\dots]$ .**

| Atom | $U_{11}$ | $U_{22}$ | $U_{33}$ | $U_{23}$ | $U_{13}$ | $U_{12}$ |
|------|----------|----------|----------|----------|----------|----------|
| F1   | 28.5(4)  | 43.5(4)  | 64.6(5)  | -6.3(4)  | -8.5(3)  | -4.5(3)  |
| O1   | 35.5(4)  | 33.9(4)  | 40.1(5)  | 2.0(4)   | -14.6(4) | -7.9(3)  |
| O2   | 50.4(6)  | 62.0(6)  | 33.1(5)  | 3.5(4)   | -8.8(4)  | -28.8(5) |
| O3   | 36.1(4)  | 41.1(5)  | 26.6(4)  | 3.0(3)   | -2.9(3)  | -12.0(4) |
| N1   | 44.3(6)  | 37.9(6)  | 46.4(6)  | 10.7(5)  | -20.9(5) | -18.9(5) |
| N2   | 33.6(5)  | 34.4(5)  | 42.2(6)  | 0.9(4)   | -5.0(4)  | -12.7(4) |
| N3   | 27.1(5)  | 22.5(4)  | 36.7(5)  | 0.7(4)   | -8.2(4)  | -4.2(3)  |
| C1   | 56.2(9)  | 46.3(8)  | 51.7(8)  | 17.2(6)  | -27.2(7) | -24.4(7) |
| C2   | 43.2(7)  | 35.4(6)  | 40.5(7)  | 8.0(5)   | -8.0(5)  | -14.7(5) |
| C3   | 27.7(5)  | 30.1(6)  | 35.5(6)  | -2.5(5)  | -5.1(4)  | -6.9(4)  |
| C4   | 25.3(5)  | 27.4(5)  | 30.4(5)  | -2.5(4)  | -3.1(4)  | -5.5(4)  |
| C5   | 25.5(5)  | 25.8(5)  | 29.4(5)  | -3.5(4)  | -2.4(4)  | -3.5(4)  |
| C6   | 31.0(5)  | 23.7(5)  | 32.7(6)  | 0.1(4)   | -3.3(4)  | -4.8(4)  |
| C7   | 31.0(6)  | 21.4(5)  | 31.5(5)  | 2.7(4)   | -8.0(4)  | -5.6(4)  |
| C8   | 30.5(6)  | 27.2(5)  | 44.6(7)  | 1.5(5)   | -10.6(5) | -3.5(4)  |
| C9   | 41.9(7)  | 35.4(6)  | 53.0(8)  | -4.5(6)  | -22.8(6) | -7.4(5)  |
| C10  | 51.6(8)  | 39.3(7)  | 40.9(7)  | -9.8(5)  | -17.3(6) | -5.1(6)  |
| C11  | 39.5(6)  | 34.7(6)  | 33.9(6)  | -5.6(5)  | -8.0(5)  | -2.2(5)  |
| C12  | 31.8(6)  | 23.2(5)  | 27.7(5)  | 2.9(4)   | -7.2(4)  | -4.8(4)  |
| C13  | 28.7(5)  | 23.4(5)  | 28.6(5)  | -0.8(4)  | -4.9(4)  | -2.4(4)  |
| C14  | 31.0(5)  | 26.6(5)  | 24.9(5)  | -0.3(4)  | -4.9(4)  | -4.7(4)  |
| C15  | 33.9(6)  | 31.2(6)  | 31.2(6)  | 2.8(5)   | -7.1(5)  | -2.3(5)  |
| C16  | 47.0(7)  | 31.3(6)  | 32.9(6)  | 7.5(5)   | -6.8(5)  | -5.0(5)  |

**Table 3 Anisotropic Displacement Parameters ( $\text{\AA}^2 \times 10^3$ ) for 230103\_ZJ\_ZYH\_5aa\_tBu\_0m. The Anisotropic displacement factor exponent takes the form:  $-2\pi^2[h^2a^2U_{11}+2hka*b*U_{12}+\dots]$ .**

| Atom | U <sub>11</sub> | U <sub>22</sub> | U <sub>33</sub> | U <sub>23</sub> | U <sub>13</sub> | U <sub>12</sub> |
|------|-----------------|-----------------|-----------------|-----------------|-----------------|-----------------|
| C17  | 45.0(7)         | 40.5(7)         | 32.8(6)         | 6.8(5)          | -2.5(5)         | -15.4(6)        |
| C18  | 32.8(6)         | 47.4(7)         | 36.9(6)         | 4.9(5)          | -3.0(5)         | -9.5(5)         |
| C19  | 31.5(6)         | 35.4(6)         | 31.8(6)         | 5.2(5)          | -5.8(5)         | -3.5(5)         |
| C20  | 29.4(5)         | 24.2(5)         | 28.6(5)         | 0.7(4)          | -5.4(4)         | -3.4(4)         |
| C21  | 30.6(6)         | 31.1(6)         | 27.9(5)         | 7.6(4)          | -6.0(4)         | -8.0(4)         |
| C22  | 41.7(7)         | 35.7(6)         | 39.7(6)         | 0.9(5)          | -12.0(5)        | -7.0(5)         |
| C23  | 55.0(9)         | 49.9(8)         | 50.3(8)         | -2.4(6)         | -21.4(7)        | -15.8(7)        |
| C24  | 46.0(8)         | 59.5(9)         | 54.3(8)         | 10.8(7)         | -26.1(7)        | -16.1(7)        |
| C25  | 37.8(7)         | 49.0(8)         | 60.2(9)         | 9.6(7)          | -19.6(6)        | -2.7(6)         |
| C26  | 38.0(7)         | 35.4(6)         | 45.7(7)         | 4.3(5)          | -12.6(5)        | -3.4(5)         |
| C27  | 30.5(5)         | 24.4(5)         | 31.4(5)         | 0.3(4)          | -6.1(4)         | -4.1(4)         |
| C28  | 33.0(6)         | 32.5(6)         | 30.3(6)         | 2.2(4)          | -5.7(4)         | -8.3(5)         |
| C29  | 36.2(6)         | 36.0(6)         | 27.3(5)         | 0.1(5)          | -3.0(5)         | -8.9(5)         |
| C30  | 42.8(7)         | 52.6(8)         | 29.4(6)         | 5.0(5)          | 0.6(5)          | -19.8(6)        |
| C31  | 38.1(8)         | 110.3(16)       | 43.5(8)         | 1.6(9)          | 1.5(6)          | -16.1(9)        |
| C32  | 92.0(13)        | 52.1(9)         | 46.0(8)         | 4.6(7)          | -3.9(8)         | -36.8(9)        |
| C33  | 53.9(8)         | 62.8(9)         | 30.2(6)         | 6.5(6)          | -2.1(6)         | -15.4(7)        |
| F2   | 37.8(4)         | 34.9(4)         | 41.3(4)         | -0.6(3)         | -19.1(3)        | -7.6(3)         |
| O4   | 28.5(4)         | 37.5(5)         | 42.9(5)         | 7.4(4)          | -4.1(4)         | -8.1(3)         |
| O5   | 49.0(6)         | 63.2(6)         | 36.3(5)         | 4.9(4)          | -12.8(4)        | -29.4(5)        |
| O6   | 42.2(5)         | 35.1(4)         | 31.7(4)         | 4.8(3)          | -6.8(4)         | -13.8(4)        |
| N4   | 30.0(5)         | 29.8(5)         | 39.3(5)         | 2.5(4)          | -0.8(4)         | -3.3(4)         |
| N5   | 30.8(5)         | 34.0(5)         | 47.8(6)         | 6.3(5)          | -10.5(4)        | -3.5(4)         |
| N6   | 27.0(4)         | 22.9(4)         | 31.2(5)         | 0.0(4)          | -4.8(4)         | -6.2(3)         |
| C34  | 34.9(6)         | 33.2(6)         | 41.9(7)         | 5.0(5)          | 0.7(5)          | -6.2(5)         |
| C35  | 38.0(6)         | 30.8(6)         | 39.0(6)         | 5.6(5)          | -9.3(5)         | -6.3(5)         |
| C36  | 26.9(5)         | 34.4(6)         | 39.3(6)         | 3.3(5)          | -6.3(5)         | -4.9(5)         |
| C37  | 27.4(5)         | 27.2(5)         | 27.3(5)         | -1.9(4)         | -6.3(4)         | -5.3(4)         |
| C38  | 28.2(5)         | 28.0(5)         | 27.0(5)         | -0.9(4)         | -6.9(4)         | -6.7(4)         |
| C39  | 30.6(5)         | 24.8(5)         | 26.4(5)         | 1.6(4)          | -6.7(4)         | -6.0(4)         |
| C40  | 28.6(5)         | 20.7(5)         | 27.3(5)         | 3.5(4)          | -6.3(4)         | -7.1(4)         |
| C41  | 31.7(6)         | 22.1(5)         | 34.9(6)         | 3.1(4)          | -11.7(4)        | -8.0(4)         |
| C42  | 27.1(6)         | 29.8(6)         | 50.8(7)         | -1.3(5)         | -7.6(5)         | -4.9(4)         |
| C43  | 33.4(6)         | 34.3(6)         | 47.2(7)         | -10.2(5)        | 1.9(5)          | -5.4(5)         |
| C44  | 35.1(6)         | 35.3(6)         | 35.2(6)         | -7.7(5)         | -3.7(5)         | -9.4(5)         |
| C45  | 29.5(5)         | 25.5(5)         | 28.1(5)         | 1.0(4)          | -5.3(4)         | -9.0(4)         |
| C46  | 29.6(5)         | 30.6(5)         | 26.4(5)         | -3.2(4)         | -5.7(4)         | -9.3(4)         |

**Table 3 Anisotropic Displacement Parameters ( $\text{\AA}^2 \times 10^3$ ) for 230103\_ZJ\_ZYH\_5aa\_tBu\_0m. The Anisotropic displacement factor exponent takes the form:  $-2\pi^2[h^2a^{*2}U_{11}+2hka^*b^*U_{12}+\dots]$ .**

| Atom | $U_{11}$ | $U_{22}$ | $U_{33}$ | $U_{23}$ | $U_{13}$ | $U_{12}$ |
|------|----------|----------|----------|----------|----------|----------|
| C47  | 32.8(6)  | 38.0(6)  | 26.6(5)  | 0.8(4)   | -10.0(4) | -15.7(5) |
| C48  | 42.6(7)  | 39.2(7)  | 38.8(6)  | 4.5(5)   | -13.8(5) | -16.2(5) |
| C49  | 63.1(9)  | 47.2(8)  | 44.8(7)  | 12.8(6)  | -20.4(7) | -30.4(7) |
| C50  | 54.7(9)  | 72.2(10) | 34.9(7)  | 9.7(7)   | -10.7(6) | -41.4(8) |
| C51  | 37.6(7)  | 74.4(10) | 32.7(6)  | -2.4(6)  | -4.4(5)  | -25.9(7) |
| C52  | 33.8(6)  | 49.6(7)  | 30.2(6)  | -0.9(5)  | -6.9(5)  | -14.4(5) |
| C53  | 31.2(6)  | 30.6(5)  | 27.1(5)  | -3.2(4)  | -6.8(4)  | -8.5(4)  |
| C54  | 28.9(5)  | 35.8(6)  | 24.1(5)  | 0.5(4)   | -5.1(4)  | -8.3(4)  |
| C55  | 33.4(6)  | 39.9(6)  | 29.5(5)  | -1.7(5)  | -6.4(5)  | -12.0(5) |
| C56  | 36.3(7)  | 59.8(8)  | 35.3(6)  | -4.7(6)  | -7.4(5)  | -20.7(6) |
| C57  | 28.5(6)  | 75.3(10) | 39.1(7)  | 0.8(7)   | -8.2(5)  | -10.1(6) |
| C58  | 34.0(7)  | 55.8(8)  | 42.2(7)  | 0.1(6)   | -3.8(5)  | 3.3(6)   |
| C59  | 36.5(6)  | 39.4(7)  | 36.1(6)  | -2.8(5)  | -4.5(5)  | -4.8(5)  |
| C60  | 33.8(6)  | 32.9(6)  | 28.9(5)  | -2.4(4)  | -7.1(4)  | -10.4(5) |
| C61  | 37.7(6)  | 34.9(6)  | 31.4(6)  | -0.1(5)  | -9.2(5)  | -12.7(5) |
| C62  | 42.0(7)  | 34.1(6)  | 28.7(5)  | -1.1(5)  | -7.0(5)  | -12.9(5) |
| C63  | 41.9(7)  | 36.6(6)  | 32.2(6)  | 1.7(5)   | 2.5(5)   | -11.7(5) |
| C64  | 76.7(11) | 45.1(8)  | 57.2(9)  | -6.5(7)  | 4.6(8)   | -30.3(8) |
| C65  | 46.4(8)  | 72.4(11) | 42.4(8)  | 1.7(7)   | 1.3(6)   | 0.8(7)   |
| C66  | 54.7(9)  | 47.9(8)  | 38.7(7)  | 10.5(6)  | -2.2(6)  | -4.4(6)  |

**Table 4 Bond Lengths for 230103\_ZJ\_ZYH\_5aa\_tBu\_0m.**

| Atom | Atom | Length/ $\text{\AA}$ | Atom | Atom | Length/ $\text{\AA}$ |
|------|------|----------------------|------|------|----------------------|
| F1   | C8   | 1.3571(15)           | F2   | C41  | 1.3658(13)           |
| O1   | C5   | 1.2292(14)           | O4   | C38  | 1.2285(14)           |
| O2   | C29  | 1.2084(16)           | O5   | C62  | 1.2088(16)           |
| O3   | C29  | 1.3440(14)           | O6   | C62  | 1.3441(15)           |
| O3   | C30  | 1.4800(15)           | O6   | C63  | 1.4773(14)           |
| N1   | C1   | 1.3341(17)           | N4   | C34  | 1.3330(16)           |
| N1   | C4   | 1.3362(15)           | N4   | C37  | 1.3331(15)           |
| N2   | C2   | 1.3264(17)           | N5   | C35  | 1.3305(17)           |
| N2   | C3   | 1.3408(16)           | N5   | C36  | 1.3382(16)           |
| N3   | C5   | 1.3449(15)           | N6   | C38  | 1.3416(15)           |
| N3   | C6   | 1.4581(14)           | N6   | C39  | 1.4616(14)           |
| C1   | C2   | 1.3784(19)           | C34  | C35  | 1.3847(18)           |

**Table 4 Bond Lengths for 230103\_ZJ\_ZYH\_5aa\_tBu\_0m.**

| Atom | Atom | Length/Å   | Atom | Atom | Length/Å   |
|------|------|------------|------|------|------------|
| C3   | C4   | 1.3879(16) | C36  | C37  | 1.3863(16) |
| C4   | C5   | 1.5047(15) | C37  | C38  | 1.5044(15) |
| C6   | C7   | 1.5134(16) | C39  | C40  | 1.5091(16) |
| C7   | C8   | 1.3898(16) | C40  | C41  | 1.3859(16) |
| C7   | C12  | 1.4067(16) | C40  | C45  | 1.4041(15) |
| C8   | C9   | 1.3755(19) | C41  | C42  | 1.3774(18) |
| C9   | C10  | 1.379(2)   | C42  | C43  | 1.3787(19) |
| C10  | C11  | 1.3884(19) | C43  | C44  | 1.3874(18) |
| C11  | C12  | 1.3998(17) | C44  | C45  | 1.3960(17) |
| C12  | C13  | 1.5016(16) | C45  | C46  | 1.4977(16) |
| C13  | C14  | 1.4822(15) | C46  | C47  | 1.4913(16) |
| C13  | C20  | 1.3630(15) | C46  | C53  | 1.3605(16) |
| C14  | C15  | 1.4010(16) | C47  | C48  | 1.3986(18) |
| C14  | C19  | 1.3977(17) | C47  | C52  | 1.3997(19) |
| C15  | C16  | 1.3862(17) | C48  | C49  | 1.3882(19) |
| C16  | C17  | 1.384(2)   | C49  | C50  | 1.389(3)   |
| C17  | C18  | 1.3823(19) | C50  | C51  | 1.380(2)   |
| C18  | C19  | 1.3881(17) | C51  | C52  | 1.3929(18) |
| C20  | C21  | 1.4993(16) | C53  | C54  | 1.4929(16) |
| C20  | C27  | 1.4607(16) | C53  | C60  | 1.4637(16) |
| C21  | C22  | 1.3869(18) | C54  | C55  | 1.3957(17) |
| C21  | C26  | 1.3950(18) | C54  | C59  | 1.3933(18) |
| C22  | C23  | 1.3965(19) | C55  | C56  | 1.3911(17) |
| C23  | C24  | 1.377(2)   | C56  | C57  | 1.385(2)   |
| C24  | C25  | 1.382(2)   | C57  | C58  | 1.383(2)   |
| C25  | C26  | 1.3885(19) | C58  | C59  | 1.3895(19) |
| C27  | C28  | 1.3373(16) | C60  | C61  | 1.3374(17) |
| C28  | C29  | 1.4801(16) | C61  | C62  | 1.4822(17) |
| C30  | C31  | 1.513(2)   | C63  | C64  | 1.519(2)   |
| C30  | C32  | 1.523(2)   | C63  | C65  | 1.514(2)   |
| C30  | C33  | 1.522(2)   | C63  | C66  | 1.524(2)   |

**Table 5 Bond Angles for 230103\_ZJ\_ZYH\_5aa\_tBu\_0m.**

| Atom | Atom | Atom | Angle/°    | Atom | Atom | Atom | Angle/°    |
|------|------|------|------------|------|------|------|------------|
| C29  | O3   | C30  | 120.91(10) | C62  | O6   | C63  | 120.63(10) |
| C1   | N1   | C4   | 116.30(11) | C34  | N4   | C37  | 116.24(10) |

**Table 5 Bond Angles for 230103\_ZJ\_ZYH\_5aa\_tBu\_0m.**

| Atom | Atom | Atom | Angle/°    | Atom | Atom | Atom | Angle/°    |
|------|------|------|------------|------|------|------|------------|
| C2   | N2   | C3   | 116.07(11) | C35  | N5   | C36  | 115.57(11) |
| C5   | N3   | C6   | 122.50(10) | C38  | N6   | C39  | 122.09(9)  |
| N1   | C1   | C2   | 121.80(13) | N4   | C34  | C35  | 121.85(12) |
| N2   | C2   | C1   | 122.44(12) | N5   | C35  | C34  | 122.38(11) |
| N2   | C3   | C4   | 121.66(11) | N5   | C36  | C37  | 122.27(11) |
| N1   | C4   | C3   | 121.64(11) | N4   | C37  | C36  | 121.65(11) |
| N1   | C4   | C5   | 118.10(10) | N4   | C37  | C38  | 119.10(10) |
| C3   | C4   | C5   | 120.21(10) | C36  | C37  | C38  | 119.24(10) |
| O1   | C5   | N3   | 124.55(10) | O4   | C38  | N6   | 124.65(10) |
| O1   | C5   | C4   | 120.85(10) | O4   | C38  | C37  | 120.01(10) |
| N3   | C5   | C4   | 114.59(10) | N6   | C38  | C37  | 115.33(10) |
| N3   | C6   | C7   | 109.64(9)  | N6   | C39  | C40  | 109.70(9)  |
| C8   | C7   | C6   | 119.95(11) | C41  | C40  | C39  | 121.33(10) |
| C8   | C7   | C12  | 116.93(11) | C41  | C40  | C45  | 116.72(10) |
| C12  | C7   | C6   | 123.04(10) | C45  | C40  | C39  | 121.61(10) |
| F1   | C8   | C7   | 118.13(11) | F2   | C41  | C40  | 117.92(10) |
| F1   | C8   | C9   | 117.54(11) | F2   | C41  | C42  | 117.73(10) |
| C9   | C8   | C7   | 124.33(12) | C42  | C41  | C40  | 124.34(11) |
| C8   | C9   | C10  | 117.81(12) | C41  | C42  | C43  | 117.98(11) |
| C9   | C10  | C11  | 120.53(12) | C42  | C43  | C44  | 120.19(12) |
| C10  | C11  | C12  | 120.77(12) | C43  | C44  | C45  | 120.87(12) |
| C7   | C12  | C13  | 122.30(10) | C40  | C45  | C46  | 120.80(10) |
| C11  | C12  | C7   | 119.50(11) | C44  | C45  | C40  | 119.86(11) |
| C11  | C12  | C13  | 118.15(10) | C44  | C45  | C46  | 119.34(10) |
| C14  | C13  | C12  | 115.23(9)  | C47  | C46  | C45  | 114.90(10) |
| C20  | C13  | C12  | 119.17(10) | C53  | C46  | C45  | 119.50(10) |
| C20  | C13  | C14  | 125.60(10) | C53  | C46  | C47  | 125.60(10) |
| C15  | C14  | C13  | 118.90(10) | C48  | C47  | C46  | 120.16(11) |
| C19  | C14  | C13  | 122.94(10) | C48  | C47  | C52  | 118.33(11) |
| C19  | C14  | C15  | 118.13(11) | C52  | C47  | C46  | 121.29(11) |
| C16  | C15  | C14  | 120.98(11) | C49  | C48  | C47  | 121.04(14) |
| C17  | C16  | C15  | 120.09(11) | C48  | C49  | C50  | 120.04(14) |
| C18  | C17  | C16  | 119.64(12) | C51  | C50  | C49  | 119.55(13) |
| C17  | C18  | C19  | 120.63(12) | C50  | C51  | C52  | 120.82(14) |
| C18  | C19  | C14  | 120.48(11) | C51  | C52  | C47  | 120.21(14) |
| C13  | C20  | C21  | 125.64(10) | C46  | C53  | C54  | 123.01(10) |
| C13  | C20  | C27  | 119.39(10) | C46  | C53  | C60  | 118.68(10) |
| C27  | C20  | C21  | 114.93(9)  | C60  | C53  | C54  | 118.27(10) |

**Table 5 Bond Angles for 230103\_ZJ\_ZYH\_5aa\_tBu\_0m.**

| Atom Atom Atom | Angle/°    | Atom Atom Atom | Angle/°    |
|----------------|------------|----------------|------------|
| C22 C21 C20    | 120.88(11) | C55 C54 C53    | 119.70(11) |
| C22 C21 C26    | 118.94(12) | C59 C54 C53    | 121.83(11) |
| C26 C21 C20    | 119.98(11) | C59 C54 C55    | 118.44(11) |
| C21 C22 C23    | 119.88(13) | C56 C55 C54    | 120.85(13) |
| C24 C23 C22    | 120.73(14) | C57 C56 C55    | 119.98(13) |
| C23 C24 C25    | 119.76(13) | C58 C57 C56    | 119.72(12) |
| C24 C25 C26    | 119.91(14) | C57 C58 C59    | 120.43(14) |
| C25 C26 C21    | 120.77(13) | C58 C59 C54    | 120.58(13) |
| C28 C27 C20    | 126.91(11) | C61 C60 C53    | 127.47(11) |
| C27 C28 C29    | 118.70(11) | C60 C61 C62    | 118.99(11) |
| O2 C29 O3      | 125.29(11) | O5 C62 O6      | 125.06(11) |
| O2 C29 C28     | 124.53(11) | O5 C62 C61     | 124.69(11) |
| O3 C29 C28     | 110.18(10) | O6 C62 C61     | 110.24(10) |
| O3 C30 C31     | 109.84(12) | O6 C63 C64     | 108.97(11) |
| O3 C30 C32     | 109.35(11) | O6 C63 C65     | 110.77(11) |
| O3 C30 C33     | 101.85(11) | O6 C63 C66     | 102.02(11) |
| C31 C30 C32    | 113.67(15) | C64 C63 C66    | 110.97(13) |
| C31 C30 C33    | 111.02(13) | C65 C63 C64    | 112.71(14) |
| C33 C30 C32    | 110.45(14) | C65 C63 C66    | 110.89(12) |

**Table 6 Torsion Angles for 230103\_ZJ\_ZYH\_5aa\_tBu\_0m.**

| A B C D      | Angle/°     | A B C D        | Angle/°     |
|--------------|-------------|----------------|-------------|
| F1 C8 C9 C10 | -179.70(12) | F2 C41 C42 C43 | -179.68(10) |
| N1 C1 C2 N2  | 2.2(3)      | N4 C34 C35 N5  | -1.3(2)     |
| N1 C4 C5 O1  | -171.66(11) | N4 C37 C38 O4  | 173.61(11)  |
| N1 C4 C5 N3  | 7.19(15)    | N4 C37 C38 N6  | -6.08(15)   |
| N2 C3 C4 N1  | 2.69(19)    | N5 C36 C37 N4  | -2.42(19)   |
| N2 C3 C4 C5  | -174.87(11) | N5 C36 C37 C38 | 176.43(11)  |
| N3 C6 C7 C8  | 91.58(12)   | N6 C39 C40 C41 | -100.42(11) |
| N3 C6 C7 C12 | -85.03(13)  | N6 C39 C40 C45 | 72.75(13)   |
| C1 N1 C4 C3  | -0.2(2)     | C34 N4 C37 C36 | 0.84(18)    |
| C1 N1 C4 C5  | 177.41(13)  | C34 N4 C37 C38 | -178.02(11) |
| C2 N2 C3 C4  | -2.62(18)   | C35 N5 C36 C37 | 1.99(19)    |
| C3 N2 C2 C1  | 0.3(2)      | C36 N5 C35 C34 | -0.2(2)     |
| C3 C4 C5 O1  | 5.98(17)    | C36 C37 C38 O4 | -5.27(16)   |
| C3 C4 C5 N3  | -175.17(10) | C36 C37 C38 N6 | 175.03(11)  |

**Table 6 Torsion Angles for 230103\_ZJ\_ZYH\_5aa\_tBu\_0m.**

| A   | B   | C   | D   | Angle/°     | A   | B   | C   | D   | Angle/°     |
|-----|-----|-----|-----|-------------|-----|-----|-----|-----|-------------|
| C4  | N1  | C1  | C2  | -2.1(2)     | C37 | N4  | C34 | C35 | 0.93(19)    |
| C5  | N3  | C6  | C7  | 115.84(12)  | C38 | N6  | C39 | C40 | -131.34(11) |
| C6  | N3  | C5  | O1  | 8.22(18)    | C39 | N6  | C38 | O4  | -4.94(17)   |
| C6  | N3  | C5  | C4  | -170.59(10) | C39 | N6  | C38 | C37 | 174.74(9)   |
| C6  | C7  | C8  | F1  | 5.82(16)    | C39 | C40 | C41 | F2  | -8.27(15)   |
| C6  | C7  | C8  | C9  | -174.71(11) | C39 | C40 | C41 | C42 | 171.04(11)  |
| C6  | C7  | C12 | C11 | 172.66(10)  | C39 | C40 | C45 | C44 | -171.60(10) |
| C6  | C7  | C12 | C13 | -10.09(16)  | C39 | C40 | C45 | C46 | 8.43(15)    |
| C7  | C8  | C9  | C10 | 0.8(2)      | C40 | C41 | C42 | C43 | 1.01(18)    |
| C7  | C12 | C13 | C14 | 114.17(12)  | C40 | C45 | C46 | C47 | 71.09(13)   |
| C7  | C12 | C13 | C20 | -66.72(15)  | C40 | C45 | C46 | C53 | -109.22(13) |
| C8  | C7  | C12 | C11 | -4.04(16)   | C41 | C40 | C45 | C44 | 1.87(15)    |
| C8  | C7  | C12 | C13 | 173.21(10)  | C41 | C40 | C45 | C46 | -178.10(10) |
| C8  | C9  | C10 | C11 | -1.8(2)     | C41 | C42 | C43 | C44 | 1.04(19)    |
| C9  | C10 | C11 | C12 | -0.2(2)     | C42 | C43 | C44 | C45 | -1.53(19)   |
| C10 | C11 | C12 | C7  | 3.23(18)    | C43 | C44 | C45 | C40 | 0.01(18)    |
| C10 | C11 | C12 | C13 | -174.13(11) | C43 | C44 | C45 | C46 | 179.99(11)  |
| C11 | C12 | C13 | C14 | -68.54(13)  | C44 | C45 | C46 | C47 | -108.88(12) |
| C11 | C12 | C13 | C20 | 110.56(13)  | C44 | C45 | C46 | C53 | 70.80(15)   |
| C12 | C7  | C8  | F1  | -177.38(10) | C45 | C40 | C41 | F2  | 178.23(9)   |
| C12 | C7  | C8  | C9  | 2.09(18)    | C45 | C40 | C41 | C42 | -2.45(16)   |
| C12 | C13 | C14 | C15 | -33.47(15)  | C45 | C46 | C47 | C48 | 35.08(15)   |
| C12 | C13 | C14 | C19 | 144.36(11)  | C45 | C46 | C47 | C52 | -139.44(11) |
| C12 | C13 | C20 | C21 | 176.96(10)  | C45 | C46 | C53 | C54 | -167.35(10) |
| C12 | C13 | C20 | C27 | -0.79(16)   | C45 | C46 | C53 | C60 | 10.31(16)   |
| C13 | C14 | C15 | C16 | -179.70(11) | C46 | C47 | C48 | C49 | -174.78(11) |
| C13 | C14 | C19 | C18 | -179.22(12) | C46 | C47 | C52 | C51 | 174.19(11)  |
| C13 | C20 | C21 | C22 | -78.27(16)  | C46 | C53 | C54 | C55 | 52.89(16)   |
| C13 | C20 | C21 | C26 | 107.00(14)  | C46 | C53 | C54 | C59 | -129.12(13) |
| C13 | C20 | C27 | C28 | 166.14(12)  | C46 | C53 | C60 | C61 | -167.87(13) |
| C14 | C13 | C20 | C21 | -4.03(19)   | C47 | C46 | C53 | C54 | 12.30(18)   |
| C14 | C13 | C20 | C27 | 178.21(10)  | C47 | C46 | C53 | C60 | -170.04(11) |
| C14 | C15 | C16 | C17 | -1.5(2)     | C47 | C48 | C49 | C50 | 0.9(2)      |
| C15 | C14 | C19 | C18 | -1.38(18)   | C48 | C47 | C52 | C51 | -0.43(17)   |
| C15 | C16 | C17 | C18 | -0.5(2)     | C48 | C49 | C50 | C51 | -1.1(2)     |
| C16 | C17 | C18 | C19 | 1.4(2)      | C49 | C50 | C51 | C52 | 0.6(2)      |
| C17 | C18 | C19 | C14 | -0.5(2)     | C50 | C51 | C52 | C47 | 0.2(2)      |
| C19 | C14 | C15 | C16 | 2.36(18)    | C52 | C47 | C48 | C49 | -0.10(18)   |



**Table 6 Torsion Angles for 230103\_ZJ\_ZYH\_5aa\_tBu\_0m.**

| A   | B   | C   | D   | Angle/°     | A   | B   | C   | D   | Angle/°     |
|-----|-----|-----|-----|-------------|-----|-----|-----|-----|-------------|
| C20 | C13 | C14 | C15 | 147.49(12)  | C53 | C46 | C47 | C48 | -144.58(12) |
| C20 | C13 | C14 | C19 | -34.68(18)  | C53 | C46 | C47 | C52 | 40.90(17)   |
| C20 | C21 | C22 | C23 | -174.40(12) | C53 | C54 | C55 | C56 | 177.93(11)  |
| C20 | C21 | C26 | C25 | 175.37(12)  | C53 | C54 | C59 | C58 | -177.97(11) |
| C20 | C27 | C28 | C29 | -179.65(11) | C53 | C60 | C61 | C62 | 177.81(11)  |
| C21 | C20 | C27 | C28 | -11.85(17)  | C54 | C53 | C60 | C61 | 9.91(19)    |
| C21 | C22 | C23 | C24 | -0.8(2)     | C54 | C55 | C56 | C57 | 0.36(19)    |
| C22 | C21 | C26 | C25 | 0.54(19)    | C55 | C54 | C59 | C58 | 0.04(18)    |
| C22 | C23 | C24 | C25 | 0.2(2)      | C55 | C56 | C57 | C58 | -0.5(2)     |
| C23 | C24 | C25 | C26 | 0.7(2)      | C56 | C57 | C58 | C59 | 0.4(2)      |
| C24 | C25 | C26 | C21 | -1.1(2)     | C57 | C58 | C59 | C54 | -0.2(2)     |
| C26 | C21 | C22 | C23 | 0.39(19)    | C59 | C54 | C55 | C56 | -0.12(18)   |
| C27 | C20 | C21 | C22 | 99.57(13)   | C60 | C53 | C54 | C55 | -124.78(12) |
| C27 | C20 | C21 | C26 | -75.16(14)  | C60 | C53 | C54 | C59 | 53.21(16)   |
| C27 | C28 | C29 | O2  | -1.6(2)     | C60 | C61 | C62 | O5  | 5.7(2)      |
| C27 | C28 | C29 | O3  | 178.64(11)  | C60 | C61 | C62 | O6  | -173.50(11) |
| C29 | O3  | C30 | C31 | 62.24(16)   | C62 | O6  | C63 | C64 | 65.55(16)   |
| C29 | O3  | C30 | C32 | -63.15(16)  | C62 | O6  | C63 | C65 | -58.99(15)  |
| C29 | O3  | C30 | C33 | 179.97(12)  | C62 | O6  | C63 | C66 | -177.06(11) |
| C30 | O3  | C29 | O2  | -2.0(2)     | C63 | O6  | C62 | O5  | 0.2(2)      |
| C30 | O3  | C29 | C28 | 177.77(11)  | C63 | O6  | C62 | C61 | 179.49(10)  |

**Table 7 Hydrogen Atom Coordinates ( $\text{\AA}\times 10^4$ ) and Isotropic Displacement Parameters ( $\text{\AA}^2\times 10^3$ ) for 230103\_ZJ\_ZYH\_5aa\_tBu\_0m.**

| Atom | x        | y       | z       | U(eq) |
|------|----------|---------|---------|-------|
| H3   | 9565.73  | 2962.15 | 7875.5  | 34    |
| H1   | 9362.22  | 819.97  | 9343.72 | 59    |
| H2   | 7870.41  | -112.86 | 9271.53 | 48    |
| H3A  | 6622.62  | 1399.44 | 7571.53 | 37    |
| H6A  | 8250.25  | 4248.75 | 6948.96 | 35    |
| H6B  | 9824.55  | 4145.62 | 6943.07 | 35    |
| H9   | 10542.86 | 5552.12 | 8862.54 | 50    |
| H10  | 8432.27  | 6027.53 | 9483.26 | 51    |
| H11  | 6539.7   | 5713.33 | 9081.58 | 43    |
| H15  | 6860.78  | 3555.31 | 8868.05 | 39    |
| H16  | 5535.38  | 2646.15 | 9672.07 | 46    |

**Table 7 Hydrogen Atom Coordinates ( $\text{\AA}\times 10^4$ ) and Isotropic Displacement Parameters ( $\text{\AA}^2\times 10^3$ ) for 230103\_ZJ\_ZYH\_5aa\_tBu\_0m.**

| Atom | x        | y        | z       | U(eq) |
|------|----------|----------|---------|-------|
| H17  | 3225.33  | 2931.7   | 9770.5  | 48    |
| H18  | 2250.63  | 4138.1   | 9070.59 | 48    |
| H19  | 3563.1   | 5030.91  | 8237.71 | 40    |
| H22  | 5473.18  | 4068.64  | 6547.7  | 46    |
| H23  | 3732.32  | 4037.18  | 5875.68 | 59    |
| H24  | 2037.36  | 5197.56  | 5830.92 | 62    |
| H25  | 2070.97  | 6409.27  | 6454.51 | 59    |
| H26  | 3828.97  | 6466.72  | 7099.14 | 48    |
| H27  | 7599.91  | 6037.39  | 7085.47 | 35    |
| H28  | 6371.74  | 6076.64  | 5821.2  | 38    |
| H31A | 10336.73 | 6507.4   | 4407.24 | 98    |
| H31B | 10583.27 | 7080.82  | 5026.81 | 98    |
| H31C | 10867.77 | 7429.07  | 4159.75 | 98    |
| H32A | 8973.6   | 8369.03  | 5364.72 | 93    |
| H32B | 7708.61  | 8652.64  | 4941.79 | 93    |
| H32C | 9149.5   | 8839.09  | 4529.05 | 93    |
| H33A | 7469.73  | 7883     | 3866.79 | 74    |
| H33B | 8499.34  | 7048.29  | 3647.83 | 74    |
| H33C | 8940.6   | 8002.08  | 3459.83 | 74    |
| H6   | 5039.78  | 9748.62  | 1176.69 | 32    |
| H34  | 5200.68  | 7483.04  | 2546.26 | 46    |
| H35  | 7207.6   | 6609.86  | 2574.57 | 43    |
| H36  | 8947.86  | 8304.31  | 1113.89 | 41    |
| H39A | 5163.06  | 10880.36 | 123.68  | 33    |
| H39B | 6407.51  | 11108.77 | 452.18  | 33    |
| H42  | 1447.57  | 12228.51 | 1464.51 | 43    |
| H43  | 2139.71  | 12622.38 | 2521.08 | 46    |
| H44  | 4371.36  | 12336.72 | 2671.2  | 41    |
| H48  | 6065.47  | 13192.71 | 1265.81 | 47    |
| H49  | 7413.74  | 13996.9  | 369.74  | 59    |
| H50  | 9510.95  | 13352.7  | -145.16 | 62    |
| H51  | 10273.29 | 11923.29 | 273.08  | 56    |
| H52  | 8948.63  | 11114.9  | 1184.28 | 44    |
| H55  | 8053.05  | 12118.05 | 2823.65 | 40    |
| H56  | 10080.66 | 11984.48 | 3269.39 | 51    |
| H57  | 11391.7  | 10629.3  | 3370.45 | 57    |
| H58  | 10652.6  | 9407.68  | 3044.5  | 55    |

**Table 7 Hydrogen Atom Coordinates ( $\text{\AA}\times 10^4$ ) and Isotropic Displacement Parameters ( $\text{\AA}^2\times 10^3$ ) for 230103\_ZJ\_ZYH\_5aa\_tBu\_0m.**

| Atom | x       | y       | z       | U(eq) |
|------|---------|---------|---------|-------|
| H59  | 8626.45 | 9534.45 | 2601.5  | 45    |
| H60  | 5062.51 | 10382.9 | 2574.6  | 37    |
| H61  | 6669.14 | 9796.89 | 3678.33 | 40    |
| H64A | 3526.33 | 7830.7  | 3999.15 | 88    |
| H64B | 3423.94 | 7217.14 | 4773.22 | 88    |
| H64C | 4847.33 | 7346.82 | 4301.67 | 88    |
| H65A | 2762.39 | 9489.82 | 5215.63 | 84    |
| H65B | 2062.09 | 8622.3  | 5385.44 | 84    |
| H65C | 2269.48 | 9101.65 | 4553.8  | 84    |
| H66A | 5457.72 | 7778.7  | 5464.86 | 74    |
| H66B | 3995.88 | 7759.82 | 5923.23 | 74    |
| H66C | 4677.12 | 8633.19 | 5815.74 | 74    |

### Experimental

Single crystals of  $\text{C}_{33}\text{H}_{30}\text{FN}_3\text{O}_3$  [230103\_ZJ\_ZYH\_5aa\_tBu\_0m] were [1]. A suitable crystal was selected and [1] on a diffractometer. The crystal was kept at 170.00 K during data collection. Using Olex2 [1], the structure was solved with the SHELXT [2] structure solution program using Intrinsic Phasing and refined with the SHELXL [3] refinement package using Least Squares minimisation.

1. Dolomanov, O.V., Bourhis, L.J., Gildea, R.J., Howard, J.A.K. & Puschmann, H. (2009), *J. Appl. Cryst.* 42, 339-341.
2. Sheldrick, G.M. (2015). *Acta Cryst.* A71, 3-8.
3. Sheldrick, G.M. (2015). *Acta Cryst.* C71, 3-8.

### Crystal structure determination of [230103\_ZJ\_ZYH\_5aa\_tBu\_0m]

**Crystal Data** for  $\text{C}_{33}\text{H}_{30}\text{FN}_3\text{O}_3$  ( $M = 535.60$  g/mol): triclinic, space group P-1 (no. 2),  $a = 10.3014(13)$   $\text{\AA}$ ,  $b = 15.605(2)$   $\text{\AA}$ ,  $c = 18.244(2)$   $\text{\AA}$ ,  $\alpha = 82.729(4)^\circ$ ,  $\beta = 80.543(4)^\circ$ ,  $\gamma = 81.413(4)^\circ$ ,  $V = 2844.7(6)$   $\text{\AA}^3$ ,  $Z = 4$ ,  $T = 170.00$  K,  $\mu(\text{GaK}\alpha) = 0.440$   $\text{mm}^{-1}$ ,  $D_{\text{calc}} = 1.251$   $\text{g/cm}^3$ , 54150 reflections measured ( $4.296^\circ \leq 2\theta \leq 121.18^\circ$ ), 12693 unique ( $R_{\text{int}} = 0.0596$ ,  $R_{\text{sigma}} = 0.0665$ ) which were used in all calculations. The final  $R_1$  was 0.0502 ( $I > 2\sigma(I)$ ) and  $wR_2$  was 0.1329 (all data).

### Refinement model description

Number of restraints 0, number of constraints unknown.

Details:

1. Fixed Uiso

At 1.2 times of:

All C(H) groups, All C(H,H) groups, All N(H) groups

At 1.5 times of:

All C(H,H,H) groups

2.a Secondary CH2 refined with riding coordinates:

C6(H6A,H6B), C39(H39A,H39B)

2.b Aromatic/amide H refined with riding coordinates:

N3(H3), C1(H1), C2(H2), C3(H3A), C9(H9), C10(H10), C11(H11), C15(H15),  
C16(H16), C17(H17), C18(H18), C19(H19), C22(H22), C23(H23), C24(H24), C25(H25),  
C26(H26), C27(H27), C28(H28), N6(H6), C34(H34), C35(H35), C36(H36), C42(H42),  
C43(H43), C44(H44), C48(H48), C49(H49), C50(H50), C51(H51), C52(H52), C55(H55),  
C56(H56), C57(H57), C58(H58), C59(H59), C60(H60), C61(H61)

2.c Idealised Me refined as rotating group:

C31(H31A,H31B,H31C), C32(H32A,H32B,H32C), C33(H33A,H33B,H33C), C64(H64A,H64B,  
H64C), C65(H65A,H65B,H65C), C66(H66A,H66B,H66C)
